# Supplementary material
Source: PubMed Central journal article supplement (PMC5359767)
Supplement: NIHMS849705-supplement-Supporting_Information.pdf [file NIHMS849705-supplement-Supporting_Information.pdf]

## A mechanistic model for colibactin-induced genotoxicity.

Alan R. Healy,<sup>1,2</sup> Herman Nikolayevskiy,<sup>1</sup> Jaymin R. Patel,<sup>2,3</sup> Jason M. Crawford,<sup>1,2,4</sup> and  
Seth B. Herzon<sup>\*,1,5</sup>

<sup>1</sup>Department of Chemistry, Yale University, 225 Prospect Street, New Haven, CT 06520

<sup>2</sup>Chemical Biology Institute, Yale University, West Haven, CT 06516

<sup>3</sup>Department of Molecular, Cellular, and Developmental Biology, Yale University, New  
Haven, Connecticut 06520, USA

<sup>4</sup>Department of Microbial Pathogenesis, Yale School of Medicine, New Haven, Connecticut,  
06536, USA

<sup>5</sup>Department of Pharmacology, Yale School of Medicine, New Haven, Connecticut, 06520,  
USA

*J. Am. Chem. Soc.*

### Supporting Information

#### **Index**

|                                                            |             |
|------------------------------------------------------------|-------------|
| <b>Supplementary Schemes.....</b>                          | <b>S2</b>   |
| <b>Supplementary Figures and Tables.....</b>               | <b>S7</b>   |
| <b>General Experimental Methods.....</b>                   | <b>S20</b>  |
| <b>Materials .....</b>                                     | <b>S20</b>  |
| <b>Instrumentation.....</b>                                | <b>S21</b>  |
| <b>Synthetic Procedures .....</b>                          | <b>S23</b>  |
| <b>Catalog of Nuclear Magnetic Resonance Spectra .....</b> | <b>S61</b>  |
| <b>Bibliography .....</b>                                  | <b>S132</b> |

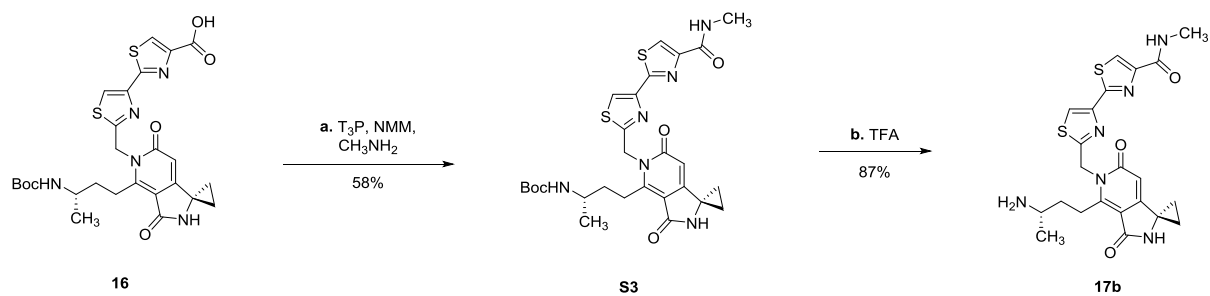

**Scheme S1.** Synthesis of the pyridone derivative **17b**. Reagents and conditions: (a) propylphosphonic anhydride solution (T<sub>3</sub>P), *N*-methylmorpholine, methylamine, THF, 23 °C, 58%; (b) trifluoroacetic acid (TFA), CH<sub>2</sub>Cl<sub>2</sub>, 0 °C, 87%.

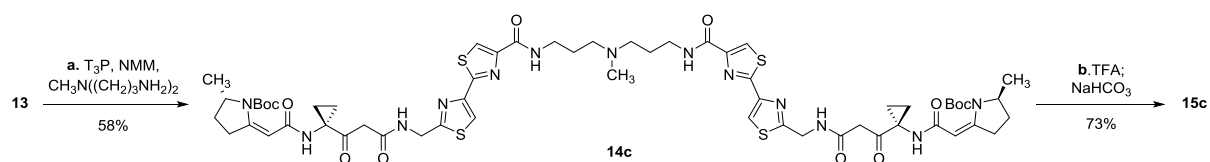

**Scheme S2.** Synthesis of the dimeric unsaturated imine **15c**. Reagents and conditions: (a) propylphosphonic anhydride solution (T3P), *N*-methylmorpholine, *N,N*-bis(3-aminopropyl)methylamine, THF, 23 °C, 58%; (b) trifluoroacetic acid (TFA), CH<sub>2</sub>Cl<sub>2</sub>, 0 °C, then aqueous NaHCO<sub>3</sub>, 23 °C, 73%.

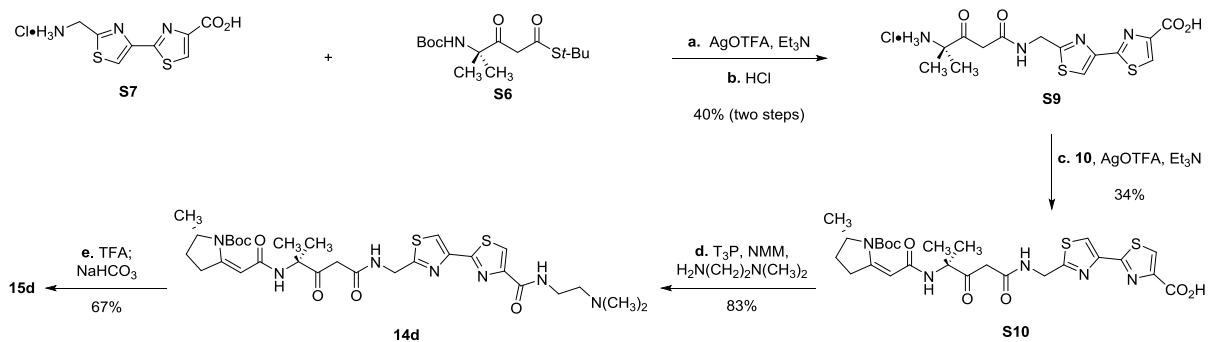

**Scheme S3.** Synthesis of the unsaturated imine **15d**. Reagents and conditions: (a) silver trifluoroacetate ( $\text{AgOTFA}$ ),  $\text{Et}_3\text{N}$ , DMF,  $0^\circ\text{C}$ , 40%; (b)  $\text{HCl}$ ,  $\text{CH}_2\text{Cl}_2$ –1,4-dioxane (1:1),  $0 \rightarrow 23^\circ\text{C}$ , >99%; (c) **10**,  $\text{AgOTFA}$ ,  $\text{Et}_3\text{N}$ , DMF,  $0^\circ\text{C}$ , 34%; (d) propylphosphonic anhydride solution (T3P), *N*-methylmorpholine, *N,N*-dimethylethylenediamine, THF,  $23^\circ\text{C}$ , 83%; (e) trifluoroacetic acid (TFA),  $\text{CH}_2\text{Cl}_2$ ,  $0^\circ\text{C}$ , then aqueous  $\text{NaHCO}_3$ ,  $23^\circ\text{C}$ , 67%.

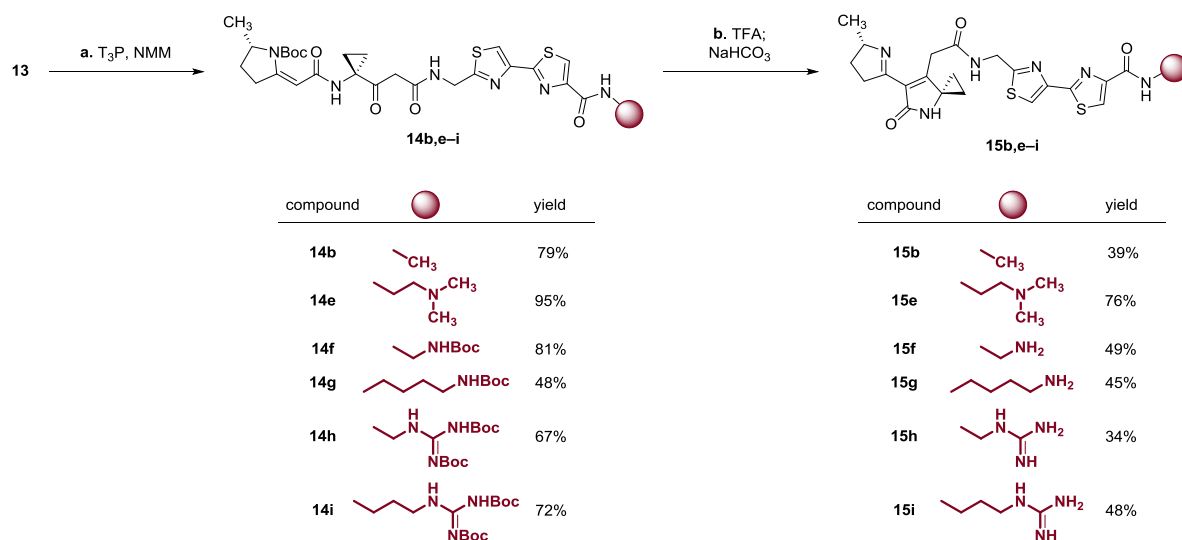

**Scheme S4.** Synthesis of the unsaturated imines **15b**, **15e-i**. Reagents and conditions: (a) methylamine, *N,N*-dimethyl-1,3-diaminopropane, *N*-(*tert*-butoxycarbonyl)-1,2-diaminoethane, *N*-(*tert*-butoxycarbonyl)-1,5-diaminopentane, *N,N'*-bis-(*tert*-butoxycarbonyl)-*N''*-(2-aminoethyl)-guanidine (**S11**), or *N,N'*-bis-(*tert*-butoxycarbonyl)-*N''*-(4-aminobutyl)-guanidine (**S12**), propylphosphonic anhydride solution (T3P), *N*-methylmorpholine, THF, 23 °C; 79% (**14b**), 95% (**14e**), 81% (**14f**), 48% (**14g**), 67% (**14h**), 72% (**14i**); (b) trifluoroacetic acid (TFA), CH<sub>2</sub>Cl<sub>2</sub>, 0 °C, then aqueous NaHCO<sub>3</sub>, 23 °C; 39% (**15b**), 76% (**15e**), 49% (**15f**), 45% (**15g**), 34% (**15h**), 48% (**15i**).

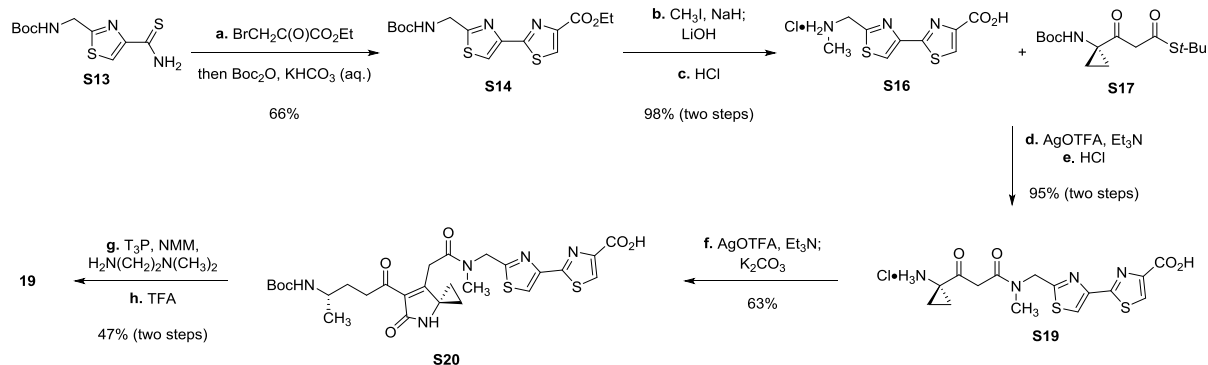

**Scheme S5.** Synthesis of the unsaturated imine **19**. Reagents and conditions: (a) ethyl bromopyruvate, *iso*-propanol, 83 °C, then di-*tert*-butyl dicarbonate, aqueous KHCO<sub>3</sub>, 1,4-dioxane, 0 °C, 66%; (b) NaH, iodomethane, DMF, -5→15 °C, then LiOH, H<sub>2</sub>O, 15 °C, 98%; (c) HCl, CH<sub>2</sub>Cl<sub>2</sub>-1,4-dioxane (3:1), 23 °C, >99%; (d) AgOTFA, Et<sub>3</sub>N, DMF, 0 °C, 95%; (e) HCl, CH<sub>2</sub>Cl<sub>2</sub>-1,4-dioxane (3:1), 23 °C, >99%; (f) AgOTFA, Et<sub>3</sub>N, DMF, 0 °C, then K<sub>2</sub>CO<sub>3</sub>, CH<sub>3</sub>OH, 0→23 °C, 63% (g) propylphosphonic anhydride solution (T3P), *N*-methylmorpholine, *N,N*-dimethylethylenediamine, THF, 23 °C, 58%; (h) trifluoroacetic acid (TFA), CH<sub>2</sub>Cl<sub>2</sub>, 0 °C, 81%.

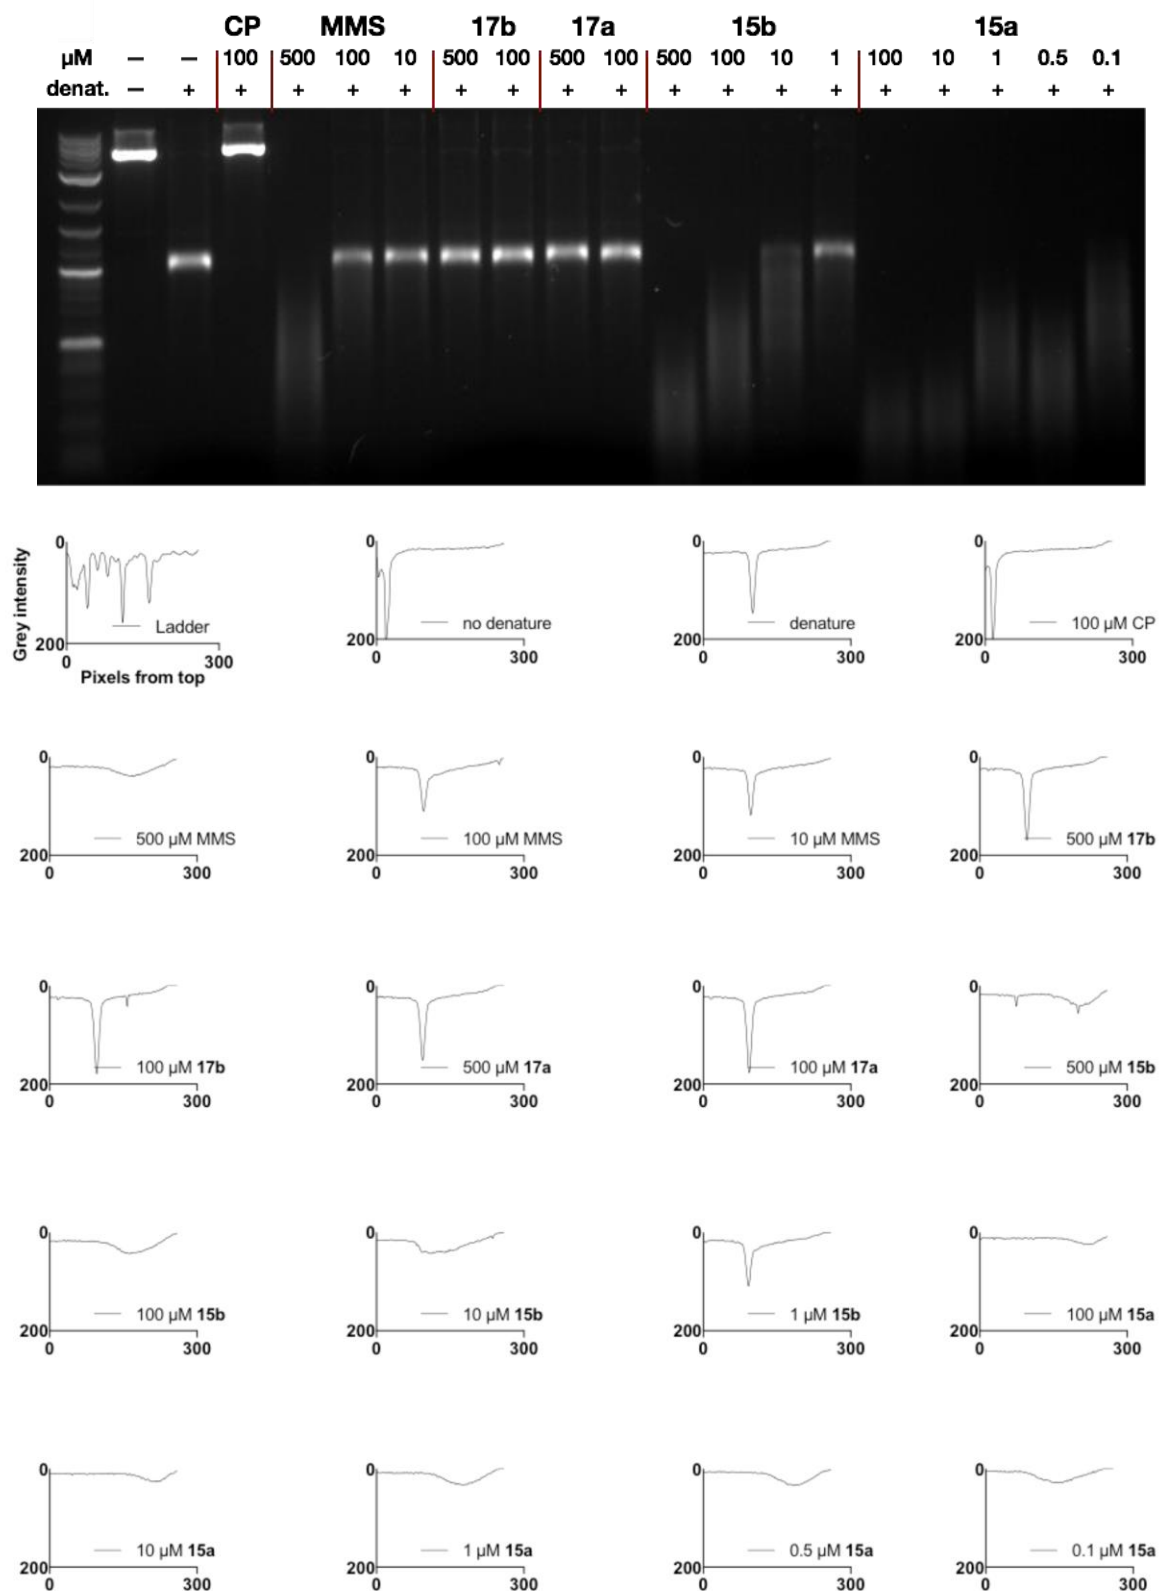

**Figure S1.** Unaltered image (top) and grayscale values (bottom) of the DNA agarose electrophoresis gel shown in Figure 2A of the manuscript, stained with SybrGold. 0 pixels on the x-axis of the graphs corresponds to the top edge of the gel. Generated using ImageJ.

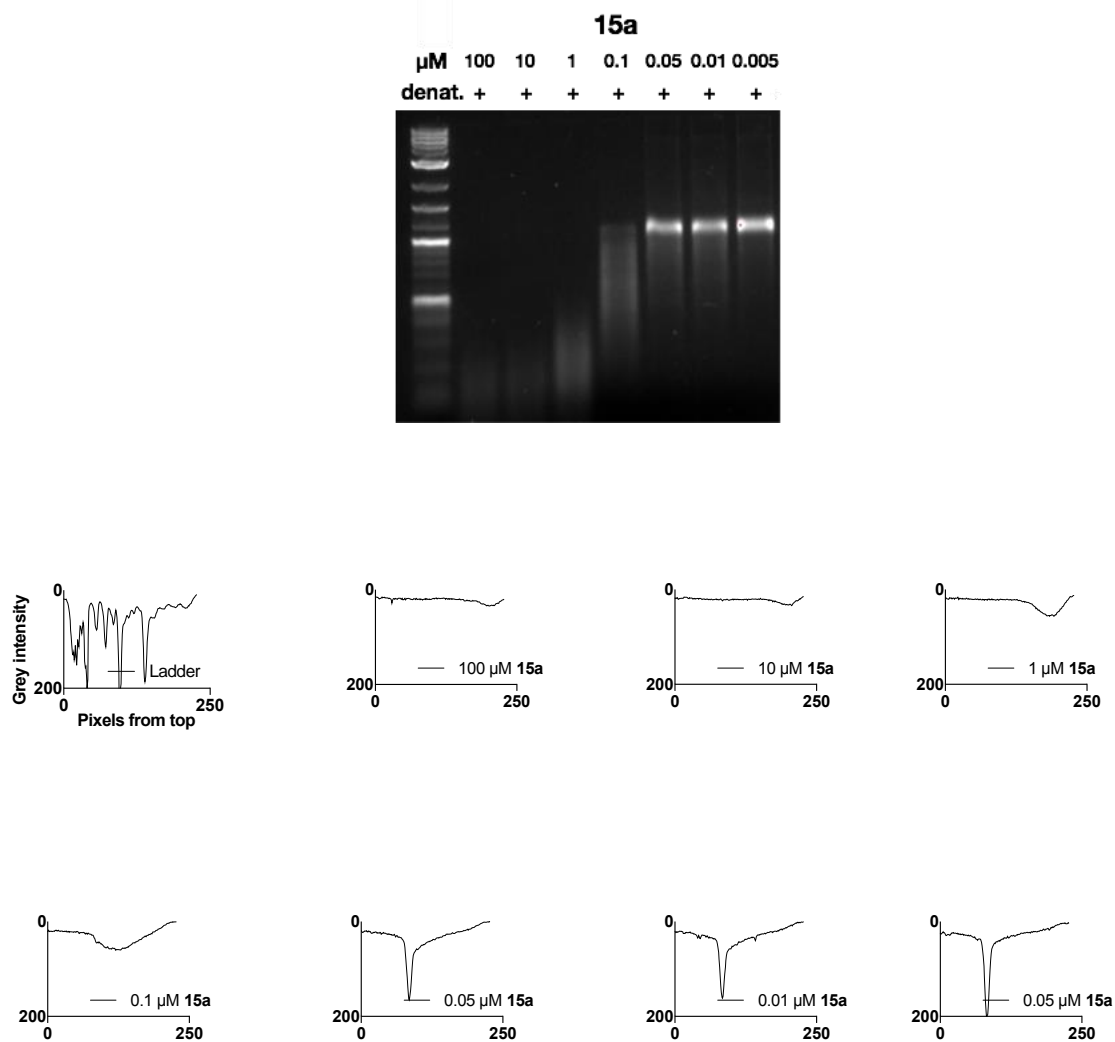

**Figure S2.** Unaltered image (top) and grayscale values (bottom) of the DNA agarose electrophoresis gel shown in Figure 2B of the manuscript, stained with SybrGold. 0 pixels on the x-axis of the graphs corresponds to the top edge of the gel. Generated using ImageJ.



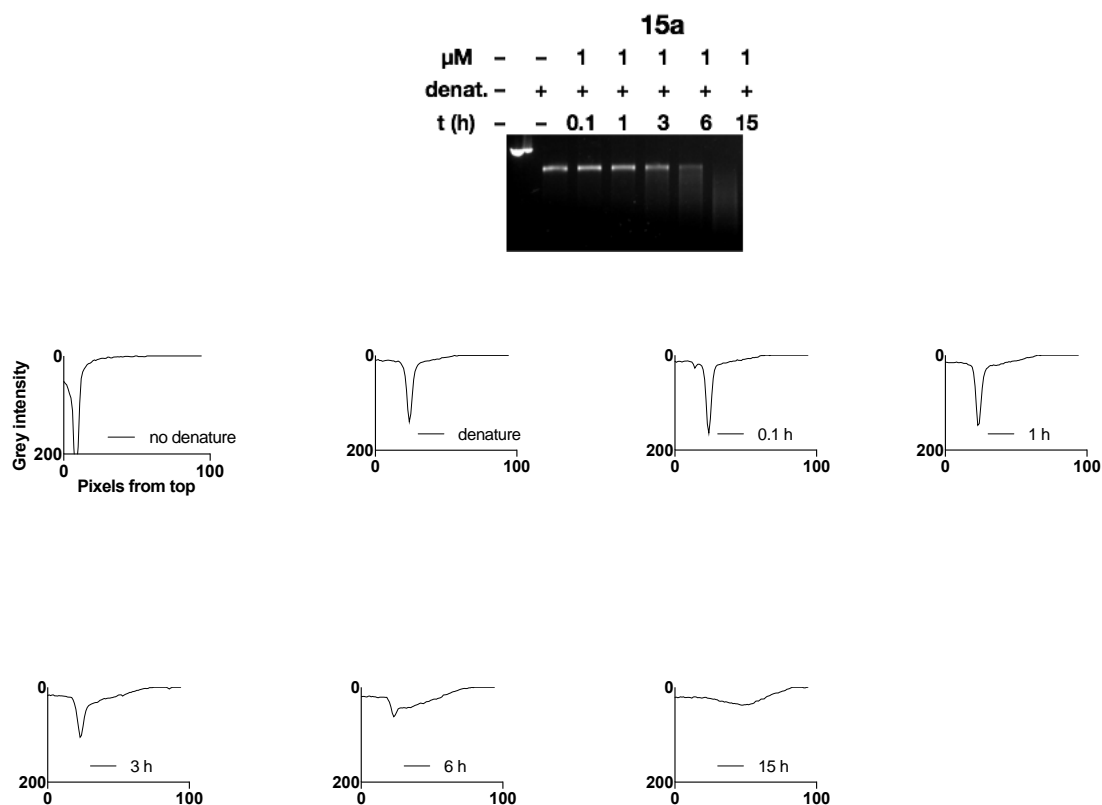

**Figure S3.** Unaltered image (top) and grayscale values (bottom) of the DNA agarose electrophoresis gel shown in Figure 3C of the manuscript, stained with SybrGold. 0 pixels on the x-axis of the graphs corresponds to the top edge of the gel. Generated using ImageJ.

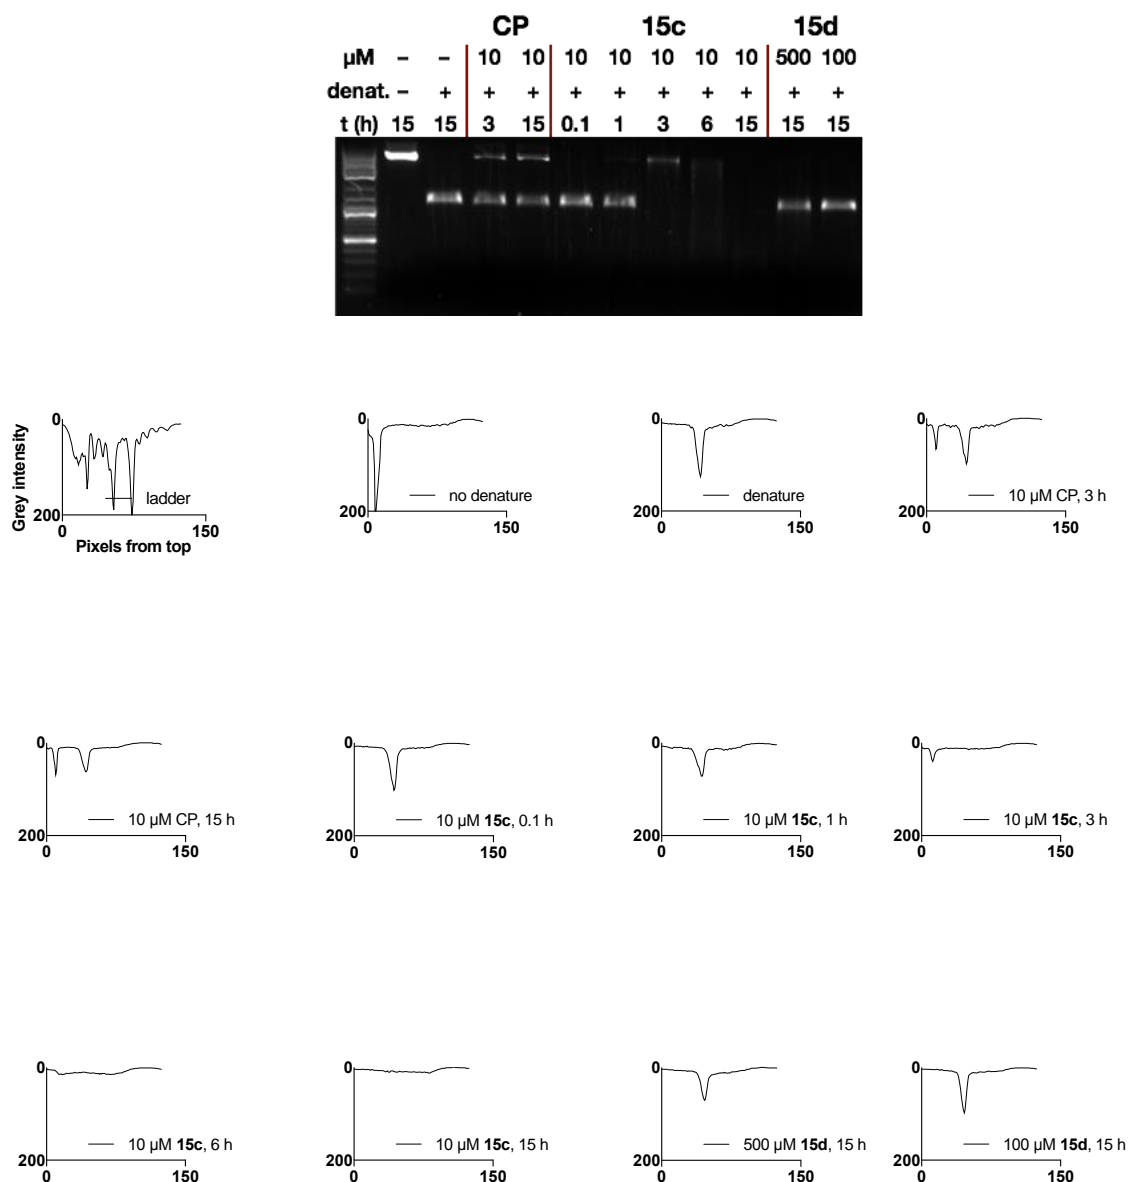

**Figure S4.** Unaltered image (top) and grayscale values (bottom) of the DNA agarose electrophoresis gel shown in Figure 4B of the manuscript, stained with SybrGold. 0 pixels on the x-axis of the graphs corresponds to the top edge of the gel. Generated using ImageJ.

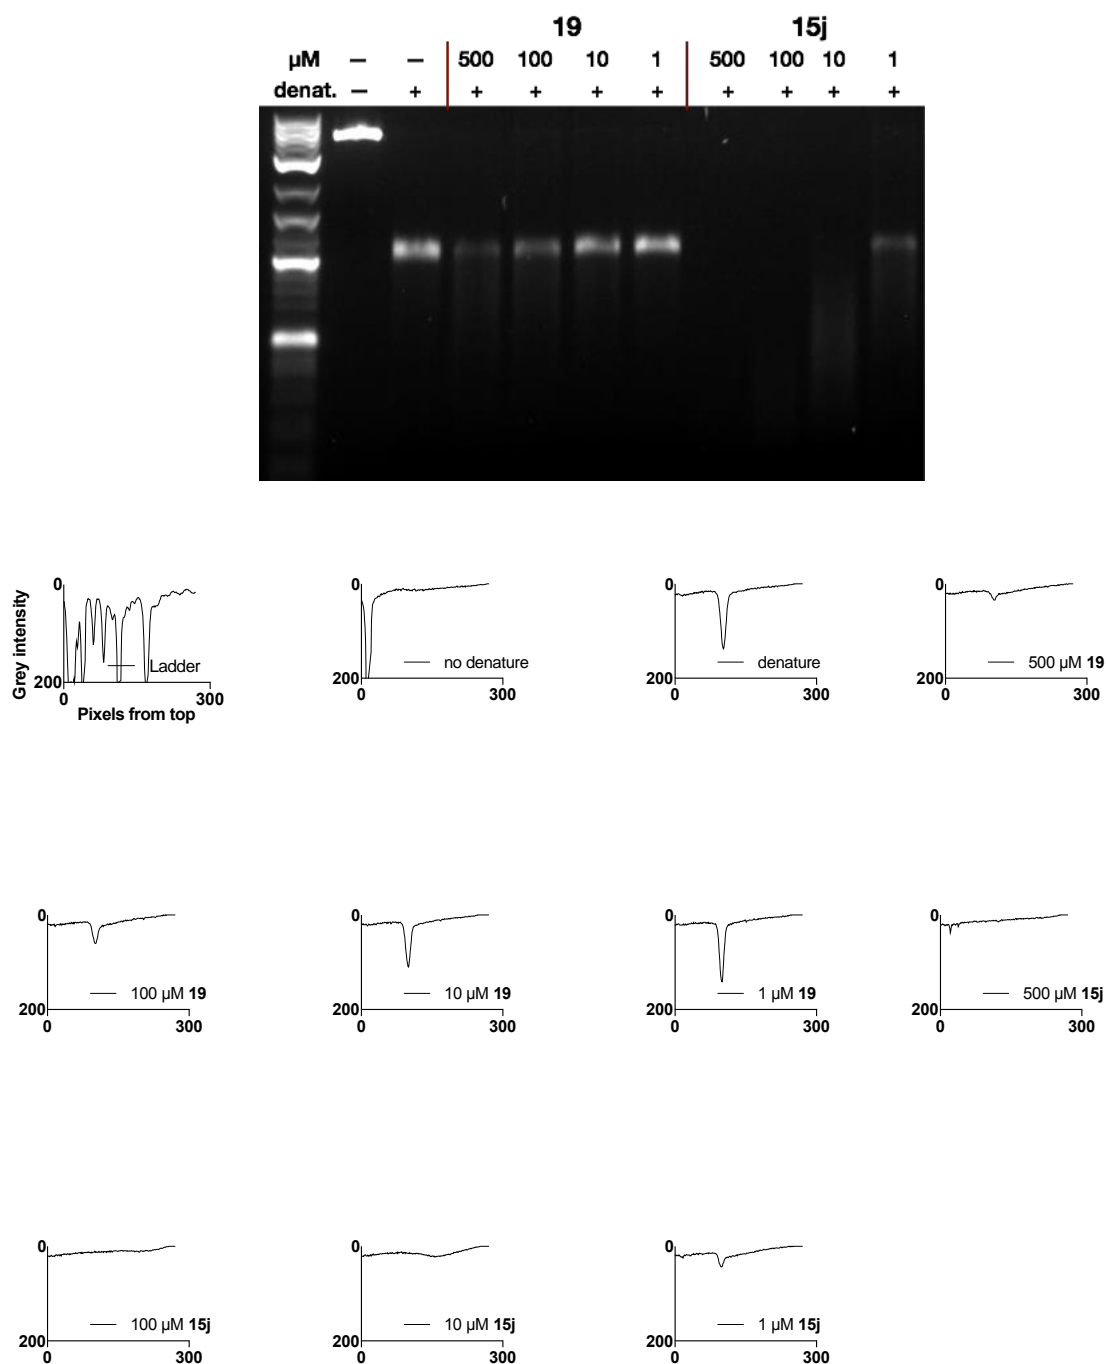

**Figure S5.** Unaltered image (top) and grayscale values (bottom) of the DNA agarose electrophoresis gel shown in Figure 5 of the manuscript, stained with SybrGold. 0 pixels on the x-axis of the graphs corresponds to the top edge of the gel. Generated using ImageJ.

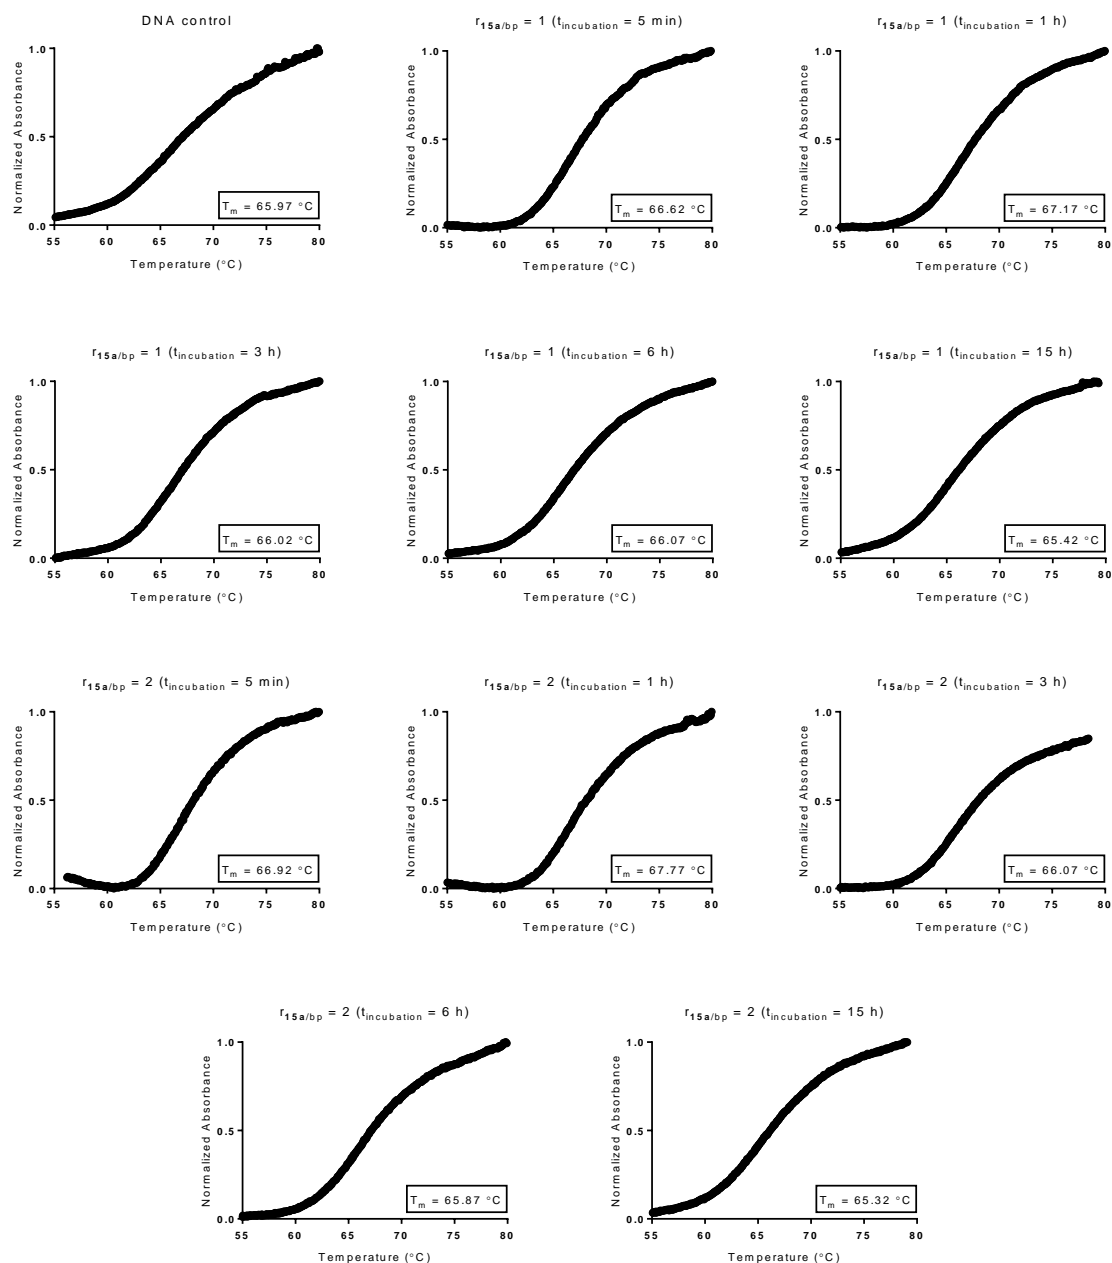

**Figure S6.** Time-dependent modulation of the melting temperature of calf thymus DNA treated with 1 or 2 bp equiv of the imine **15a**. Conditions: 2.09 mM NaH<sub>2</sub>PO<sub>4</sub>, 7.13 mM Na<sub>2</sub>HPO<sub>4</sub>, 928 μM Na<sub>2</sub>EDTA, 1.01 mM DMSO, pH 7.18. The imine **15a** was incubated with ctDNA for 5 min, 1 h, 3 h, 6 h, or 15 h prior to UV thermal denaturation experiments (260 nm, heating rate: 0.5 °C/min). [DNA] = 32.0 mM bps. The  $T_m$  was defined as the temperature at which half of the duplex DNA was unwound, and was determined by the maximum of the first derivative of the thermal denaturation profile.

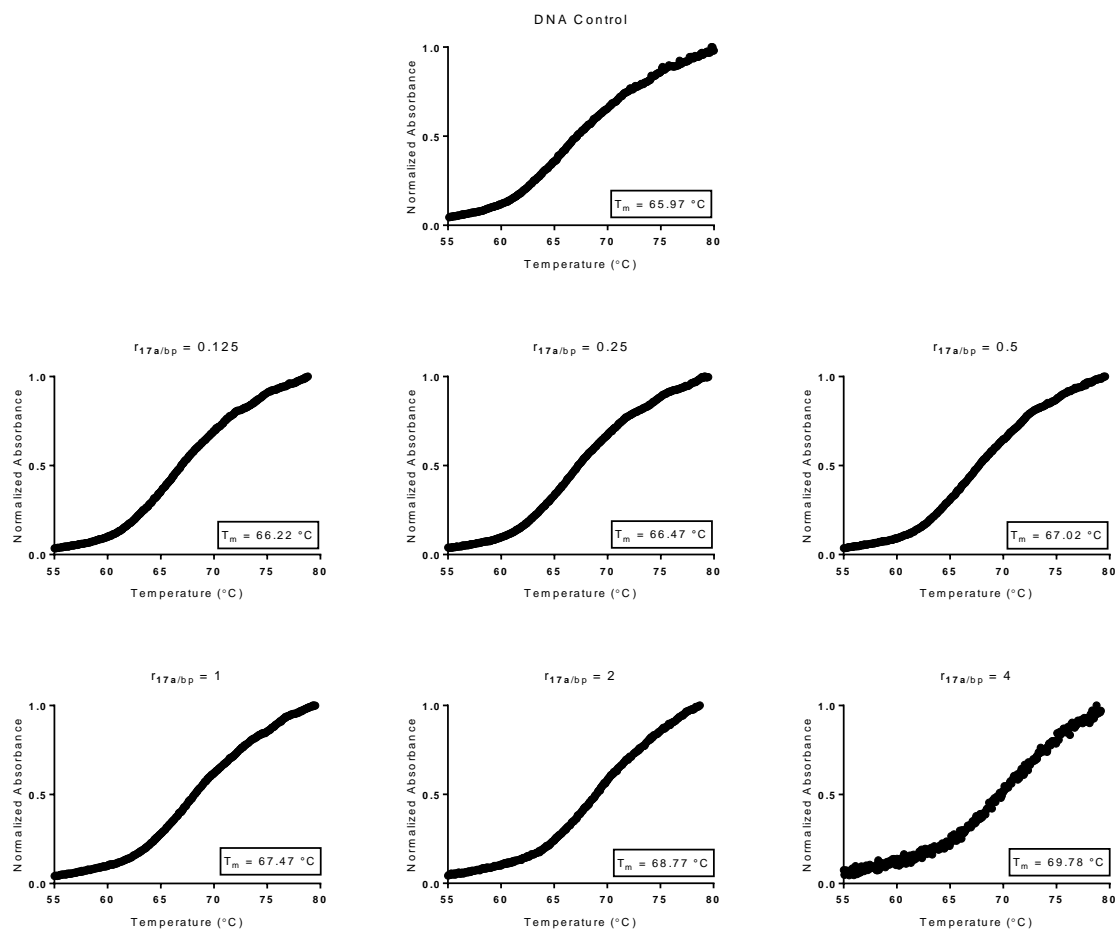

**Figure S7.** Increase in the melting temperature of calf thymus DNA after treatment with increasing amounts of the pyridone **17a**. Conditions: 2.09 mM NaH<sub>2</sub>PO<sub>4</sub>, 7.13 mM Na<sub>2</sub>HPO<sub>4</sub>, 928 μM Na<sub>2</sub>EDTA, 1.01 mM DMSO, pH 7.18. The pyridone **17a** was incubated with ctDNA for 3 h prior to UV thermal denaturation experiments (260 nm, heating rate: 0.5 °C/min). [DNA] = 32.0 mM bps. The  $T_m$  was defined as the temperature at which half of the duplex DNA was unwound, and was determined by the maximum of the first derivative of the thermal denaturation profile.

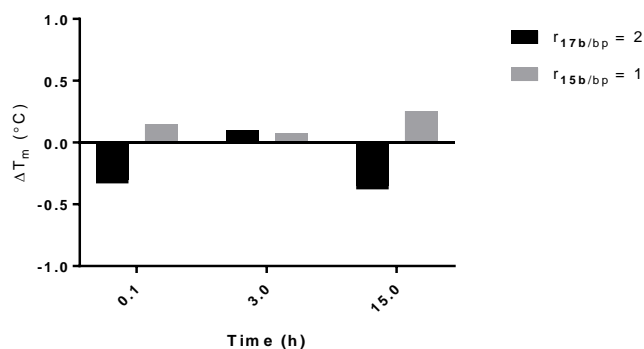

**Figure S8.** No significant modulation of the melting temperature of calf thymus DNA was observed on treatment with 2 bp equiv of the pyridone **17b** or 1 bp equiv of the imine **15b**. Conditions: 2.09 mM NaH<sub>2</sub>PO<sub>4</sub>, 7.13 mM Na<sub>2</sub>HPO<sub>4</sub>, 928 μM Na<sub>2</sub>EDTA, 1.01 mM DMSO, pH 7.18. The pyridone **17b** and the imine **15b** were incubated with ctDNA for 5 min, 3 h, or 15 h prior to UV thermal denaturation experiments (260 nm, heating rate: 0.5 °C/min). [DNA] = 32.0 mM bps.

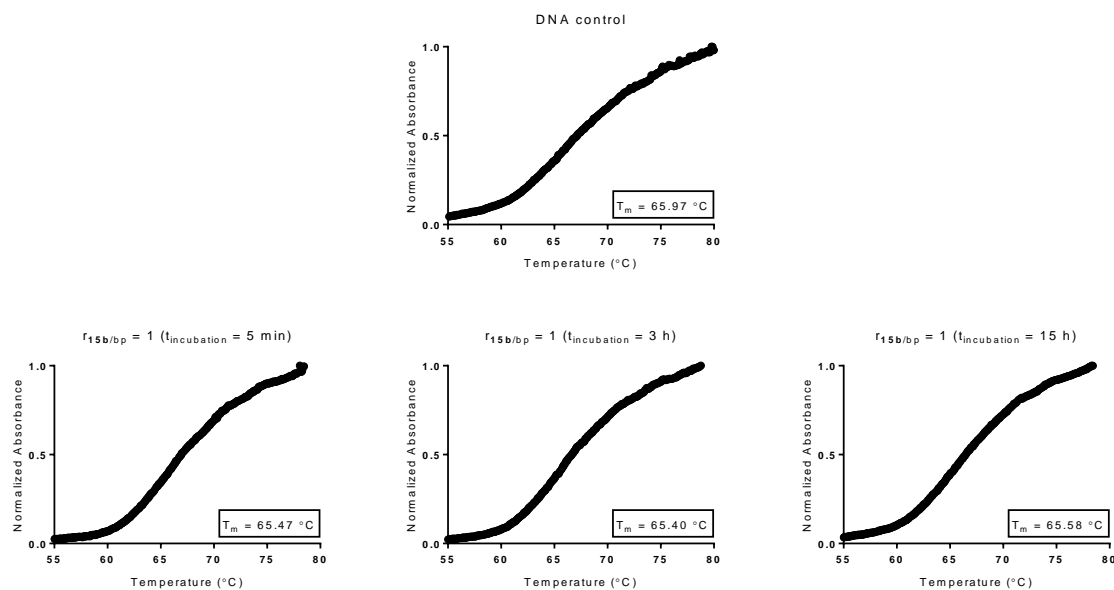

**Figure S9.** No significant modulation of the melting temperature of calf thymus DNA was observed on treatment with 2 bp equiv of the unsaturated imine **15b**. Conditions: 2.09 mM NaH<sub>2</sub>PO<sub>4</sub>, 7.13 mM Na<sub>2</sub>HPO<sub>4</sub>, 928 μM Na<sub>2</sub>EDTA, 1.01 mM DMSO, pH 7.18. The imine **15b** was incubated with ctDNA for 5 min, 1 h, 3 h, 6 h, or 15 h prior to UV thermal denaturation experiments (260 nm, heating rate: 0.5 °C/min). [DNA] = 32.0 mM bps. The T<sub>m</sub> was defined as the temperature at which half of the duplex DNA was unwound, and was determined by the maximum of the first derivative of the thermal denaturation profile.

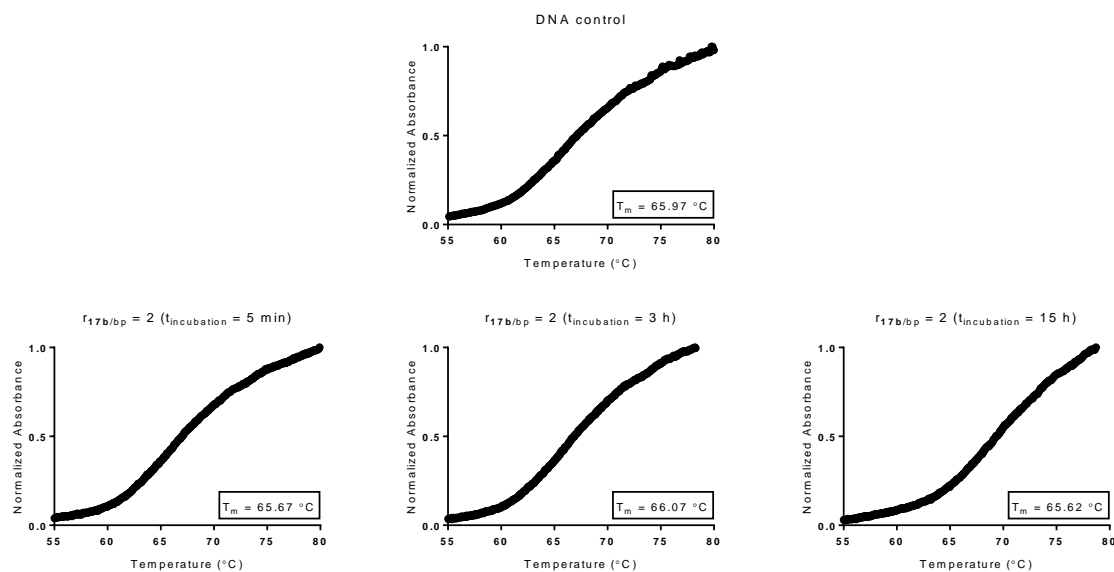

**Figure S10.** No significant modulation of the melting temperature of calf thymus DNA was observed on treatment with 2 bp equiv of the pyridone **17b**. Conditions: 2.09 mM NaH<sub>2</sub>PO<sub>4</sub>, 7.13 mM Na<sub>2</sub>HPO<sub>4</sub>, 928 μM Na<sub>2</sub>EDTA, 1.01 mM DMSO, pH 7.18. The pyridone **17b** was incubated with ctDNA for 5 min, 1 h, 3 h, 6 h, or 15 h prior to UV thermal denaturation experiments (260 nm, heating rate: 0.5 °C/min). [DNA] = 32.0 mM bps. The  $T_m$  was defined as the temperature at which half of the duplex DNA was unwound, and was determined by the maximum of the first derivative of the thermal denaturation profile.



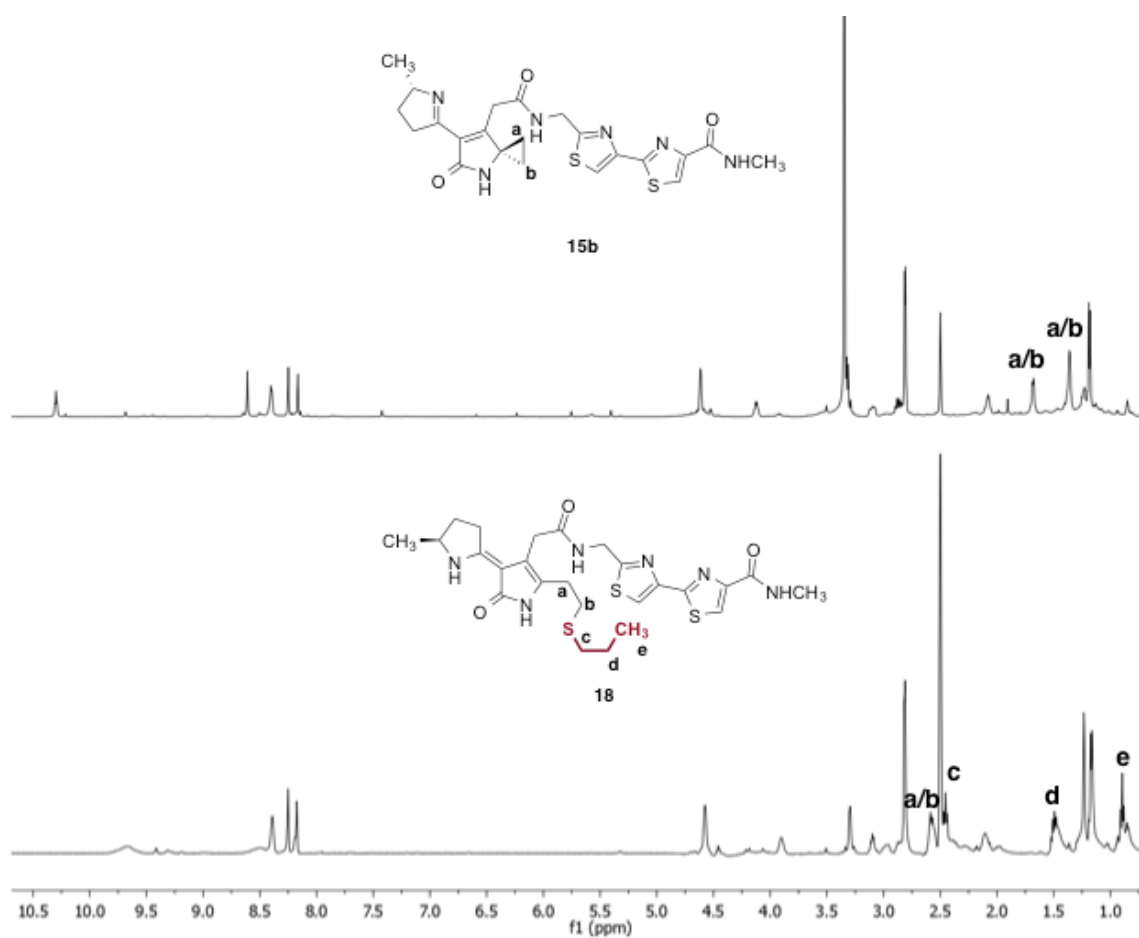

**Figure S11.** A comparison of the  $^1\text{H}$  NMR of the unsaturated imine **15b** (top) and the propanethiol adduct product **18** (bottom).  $^1\text{H}$  spectroscopic data were recorded in  $\text{DMSO-}d_6$  (600 MHz (**15b**), 500 MHz (**18**), 23 °C).

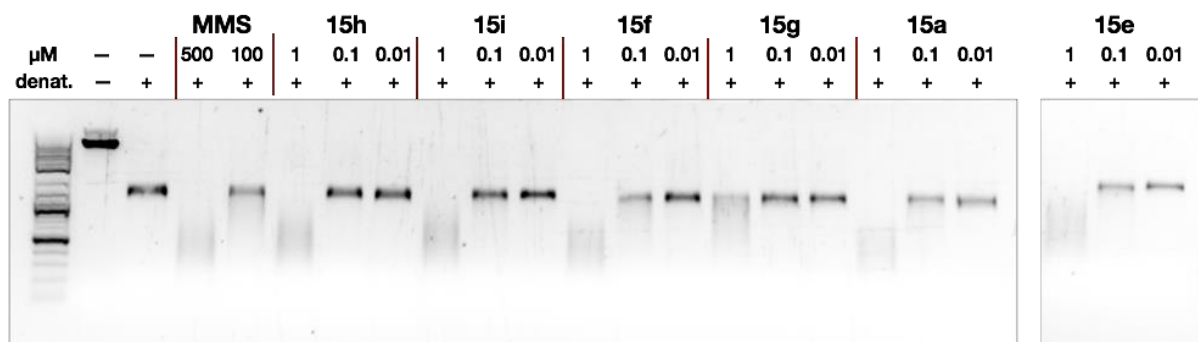

**Figure S12.** DNA alkylation assay employing linearized pBR322 DNA and the derivatives **15a** and **15e–i** to probe the influence of the cationic residue on DNA alkylation activity. Conditions: Linearized pBR322 DNA (20  $\mu\text{M}$  in base pairs), **15h** (1, 0.1, or 0.01  $\mu\text{M}$ ), **15i** (1, 0.1, or 0.01  $\mu\text{M}$ ), **15f** (1, 0.1, or 0.01  $\mu\text{M}$ ), **15g** (1, 0.1, or 0.01  $\mu\text{M}$ ), **15a** (1, 0.1, or 0.01  $\mu\text{M}$ ), **15e** (1, 0.1, or 0.01  $\mu\text{M}$ ), 37  $^{\circ}\text{C}$ , 15 h. Methyl methanesulfonate (MMS; 500 or 100  $\mu\text{M}$ ) was used as a positive control for DNA alkylation. DNA was visualized using SybrGold.

**Table S1.** Comparison of selected  $^1\text{H}$  and  $^{13}\text{C}$  NMR Data of **15b** and **18**.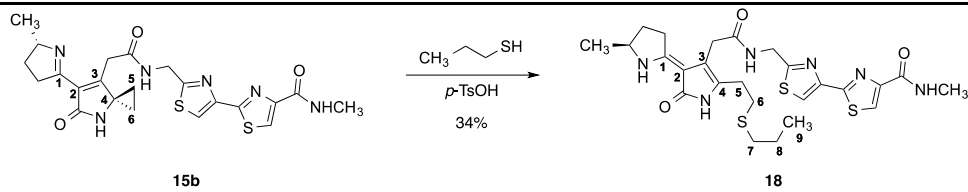

| Position | $\delta_{\text{H}}$ ( <b>15b</b> ) <sup>a</sup> | $\delta_{\text{H}}$ ( <b>18</b> ) <sup>b</sup> | $\delta_{\text{C}}$ ( <b>15b</b> ) <sup>a</sup> | $\delta_{\text{C}}$ ( <b>18</b> ) <sup>b</sup> |
|----------|-------------------------------------------------|------------------------------------------------|-------------------------------------------------|------------------------------------------------|
| 1        | —                                               | —                                              | 168.4                                           | 160.8                                          |
| 2        | —                                               | —                                              | 127.4                                           | 96.1                                           |
| 3        | —                                               | —                                              | 157.7                                           | 104.3                                          |
| 4        | —                                               | —                                              | 45.3                                            | 125.8                                          |
| 5        | 1.31–1.42 (m)<br>1.62–1.73 (m)                  | 2.61–2.57 (m)                                  | 11.7                                            | 30.4                                           |
| 6        | 1.31–1.42 (m)<br>1.62–1.73 (m)                  | 2.61–2.57 (m)                                  | 11.7                                            | 25.7                                           |
| 7        | —                                               | 2.45 (t, 7.3)                                  | —                                               | 33.1                                           |
| 8        | —                                               | 1.44–1.56 (m)                                  | —                                               | 22.5                                           |
| 9        | —                                               | 0.90 (t, 7.4)                                  | —                                               | 13.3                                           |

<sup>a</sup>NMR spectra were obtained in DMSO-*d*<sub>6</sub> at 600 MHz for  $^1\text{H}$  and 150 MHz for  $^{13}\text{C}$ . <sup>b</sup>NMR spectra were obtained in DMSO-*d*<sub>6</sub> at 500 MHz for  $^1\text{H}$  and 125 MHz for  $^{13}\text{C}$ .

## General Experimental Methods.

**UV Spectroscopy.** UV thermal denaturation samples were prepared by mixing calf thymus DNA [32.0 mM base pairs (bps)] in 2.09 mM NaH<sub>2</sub>PO<sub>4</sub>, 7.13 mM Na<sub>2</sub>HPO<sub>4</sub>, 928 μM Na<sub>2</sub>EDTA, 1.01 mM DMSO, pH 7.18 to a final volume of 1.0 mL. Samples were subjected to sonication (6 h) at 25 °C to effect complete dissolution. After incubation with **15a**, **15b**, **17a**, and **17b** for 5 min, 1 h, 3 h, 6 h, or 15 h, the UV thermal denaturation spectra of the samples were recorded at 260 nm as a function of temperature (55→80 °C, heating rate: 0.5 °C/min). First derivative plots were used to determine the denaturation temperature.

**Electrophoretic gel assay.** The 4,163 bp plasmid pBR322 was propagated in DH5a, isolated by MaxiPrep (Qiagen), and linearized with 5U/μg EcoRI (NEB). The cut plasmid was column purified and eluted into 10 mM Tris pH 8.0. For each reaction, 130 ng of DNA (20 μM base pairs) was incubated with compound in a 10 μL total volume. Reactions proceeded for 15 h at 37 °C, unless otherwise noted. Compounds were diluted in DMSO such that each reaction consisted of a fixed 5% DMSO concentration. Pure MMS (Alfa Aesar) and cisplatin (Biovision) stock solutions were diluted into DMSO immediately prior to use. After incubation, 35 μL of denaturation buffer (6% sucrose, 1% sodium hydroxide, 0.04% bromophenol blue) was added to each reaction. Non-denatured control samples were diluted with 6% sucrose, 0.04% bromophenol blue. Samples were vortexed for 1 min, left at room temperature for 15 min, and then immediately frozen at -80 °C. Thawed samples were then loaded onto a 1% agarose Tris-Borate-EDTA (TBE) gel stained with SybrGold (Molecular Probes) and run in TBE buffer for 1 hour at 120V.

**General Experimental Procedures.** All reactions were performed in single-neck, flame-dried, round-bottomed flasks fitted with rubber septa under a positive pressure of nitrogen unless otherwise noted. Air- and moisture-sensitive liquids were transferred via syringe or stainless steel cannula, or were handled in a nitrogen-filled drybox (working oxygen level <10 ppm). Organic solutions were concentrated by rotary evaporation at 28–32 °C. Flash-column chromatography was performed as described by Still et al.,<sup>1</sup> employing silica gel (60 Å, 40–63 μm particle size) purchased from Sorbent Technologies (Atlanta, GA). Anion-exchange chromatography was performed as described by Béland et al.,<sup>2</sup> employing trimethylamine acetate-functionalized silica gel (SiliaBond® TMA Acetate). Analytical thin-layered chromatography (TLC) was performed using glass plates pre-coated with silica gel (0.25 mm, 60 Å pore size) impregnated with a fluorescent indicator (254 nm). TLC plates were visualized by exposure to ultraviolet light (UV).

**Materials.** Commercial solvents and reagents were used as received with the following exceptions. Dichloromethane, ether and *N,N*-dimethylformamide were purified according to the method of Pangborn et al.<sup>3</sup> Triethylamine was distilled from calcium hydride under an atmosphere of argon immediately before use. Di-*iso*-propylamine was distilled from calcium hydride and was stored under nitrogen. Methanol was distilled from magnesium turnings under an atmosphere of nitrogen immediately before use. Tetrahydrofuran was distilled from sodium-benzophenone under an atmosphere of nitrogen immediately before use. Deoxyribonucleic acid sodium salt from calf thymus (Type I, fibers) was purchased from

Sigma Aldrich. Trimethylamine acetate-functionalized silica gel (SiliaBond® TMA Acetate) was purchased from SiliCycle (Quebec City, CA). *tert*-butyl-(*S*)-2-methyl-5-oxopyrrolidine-1-carboxylate (**S1**),<sup>4</sup> 2'-((3-(1-aminocyclopropyl)-3-oxopropanamido)methyl)-[2,4'-bithiazole]-4-carboxylic acid hydrochloride (**11**),<sup>5</sup> 3-(*tert*-butylthio)-3-oxopropanoic acid (**S5**),<sup>6</sup> 2'-(aminomethyl)-[2,4'-bithiazole]-4-carboxylic acid hydrochloride (**S7**),<sup>5</sup> *N,N'*-bis-(*tert*-butoxycarbonyl)-*N''*-(2-aminoethyl)-guanidine (**S11**),<sup>7</sup> *N,N'*-bis-(*tert*-butoxycarbonyl)-*N''*-(4-aminobutyl)-guanidine (**S12**),<sup>7</sup> *tert*-butyl-((4-carbamothioylthiazol-2-yl)methyl)carbamate (**S13**),<sup>5</sup> and *S*-(*tert*-butyl)-3-(1-((*tert*-butoxycarbonyl)amino)cyclopropyl)-3-oxopropanethioate (**S17**)<sup>5</sup> were prepared according to published procedures.

**Instrumentation.** Proton nuclear magnetic resonance spectra (<sup>1</sup>H NMR) were recorded at 500 or 600 MHz at 24 °C, unless otherwise noted. Chemical shifts are expressed in parts per million (ppm, δ scale) downfield from tetramethylsilane and are referenced to residual protium in the NMR solvent (CD<sub>2</sub>Cl<sub>2</sub>, δ 5.32; CD<sub>3</sub>OD, δ 3.31; C<sub>2</sub>D<sub>6</sub>OS, δ 2.50). Data are represented as follows: chemical shift, multiplicity (s = singlet, d = doublet, t = triplet, q = quartet, m = multiplet and/or multiple resonances, br = broad, app = apparent), coupling constant in Hertz, integration, and assignment. Proton-decoupled carbon nuclear magnetic resonance spectra (<sup>13</sup>C NMR) were recorded at 125 MHz at 24 °C, unless otherwise noted. Chemical shifts are expressed in parts per million (ppm, δ scale) downfield from tetramethylsilane and are referenced to the carbon resonances of the solvent (CD<sub>2</sub>Cl<sub>2</sub>, δ 54.0; CD<sub>3</sub>OD, δ 49.0; C<sub>2</sub>D<sub>6</sub>OS, δ 39.5). Signals of protons and carbons were assigned, as far as possible, by using the following two dimensional NMR spectroscopy techniques: [<sup>1</sup>H, <sup>1</sup>H] COSY (Correlation Spectroscopy), [<sup>1</sup>H, <sup>13</sup>C] HSQC (Heteronuclear Single Quantum Coherence) and long range [<sup>1</sup>H, <sup>13</sup>C] HMBC (Heteronuclear Multiple Bond Connectivity). Attenuated total reflectance Fourier transform infrared (ATR-FTIR) spectra were obtained using a Thermo Electron Corporation Nicolet 6700 FTIR spectrometer referenced to a polystyrene standard. Data are represented as follows: frequency of absorption (cm<sup>-1</sup>), intensity of absorption (s = strong, m = medium, w = weak, br = broad). Analytical ultra high-performance liquid chromatography/mass spectrometry (UPLC/MS) was performed on a Waters UPLC/MS instrument equipped with a reverse-phase C<sub>18</sub> column (1.7 μm particle size, 2.1 × 50 mm), dual atmospheric pressure chemical ionization (API)/electrospray (ESI) mass spectrometry detector, and photodiode array detector. Samples were eluted with a linear gradient of 5% acetonitrile–water containing 0.1% formic acid→100% acetonitrile containing 0.1% formic acid over 0.75 min, followed by 100% acetonitrile containing 0.1% formic acid for 0.75 min, at a flow rate of 800 μL/min. High-resolution mass spectrometry (HRMS) were obtained on a Waters UPLC/HRMS instrument equipped with a dual API/ESI high-resolution mass spectrometry detector and photodiode array detector. Unless otherwise noted, samples were eluted over a reverse-phase C<sub>18</sub> column (1.7 μm particle size, 2.1 × 50 mm) with a linear gradient of 5% acetonitrile–water containing 0.1% formic acid→95% acetonitrile–water containing 0.1% formic acid for 1 min, at a flow rate of 600 μL/min. Optical rotations were measured on a Perkin Elmer polarimeter equipped with a sodium (589 nm, D) lamp. Optical rotation data are represented as follows: specific rotation ([α]<sub>λ</sub><sup>T</sup>),

concentration (g/100 mL), and solvent. UV spectra were recorded on a Cary 3E UV/Vis spectrophotometer equipped with a thermoelectrically controlled 12-cell holder. High precision quartz SUPRASIL cells with a 1 cm path length were used for all absorbance studies.

## Synthetic Procedures.

### Synthesis of the $\beta$ -ketothioester **10**:

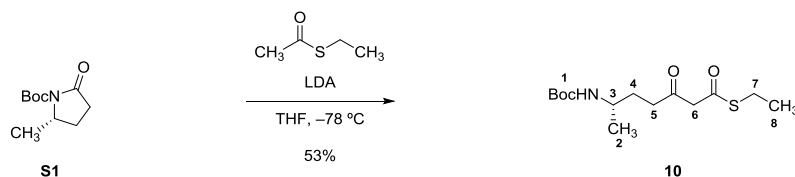

Ethyl thioacetate (2.08 mL, 19.5 mmol, 1.30 equiv) was added dropwise via syringe to a solution of lithium di-*iso*-propylamide (19.5 mmol, 1.30 equiv) in tetrahydrofuran (75 mL) at  $-78$  °C. The reaction mixture was stirred for 30 min at  $-78$  °C. A solution of the imide **S1** (3.00 g, 15.1 mmol, 1 equiv) in tetrahydrofuran (28 mL) was added dropwise via cannula to the reaction mixture. The resulting mixture was stirred for 3 h at  $-78$  °C. The product mixture was diluted sequentially with saturated aqueous ammonium chloride solution (30 mL) and ethyl acetate (50 mL). The diluted product mixture was transferred to a separatory funnel and the layers that formed were separated. The aqueous layer was extracted with ethyl acetate ( $2 \times 50$  mL). The organic layers were combined and the combined organic layers were washed with saturated aqueous sodium chloride solution (30 mL). The washed organic layer was dried over sodium sulfate. The dried solution was filtered and the filtrate was concentrated. The residue obtained was purified by flash-column chromatography (eluting with 5% ethyl acetate–hexanes initially, grading to 20% ethyl acetate–hexanes, linear gradient) to provide the  $\beta$ -ketothioester **10** as a light pink solid (2.40 g, 53%).

$^1\text{H}$  NMR (500 MHz,  $\text{CD}_2\text{Cl}_2$ )  $\delta$  4.38 (bs, 1H), 3.66 (s, 2H, H<sub>6</sub>), 3.58 (m, 1H, H<sub>3</sub>), 2.90 (q,  $J = 6.9$  Hz, 2H, H<sub>7</sub>), 2.65 – 2.50 (m, 2H, H<sub>5</sub>), 1.77 – 1.67 (m, 1H, H<sub>4</sub>), 1.62 – 1.52 (m, 1H, H<sub>4</sub>), 1.41 (s, 9H, H<sub>1</sub>), 1.25 (t,  $J = 7.8$  Hz, 3H, H<sub>8</sub>), 1.10 (d,  $J = 6.6$  Hz, 3H, H<sub>2</sub>).  $^{13}\text{C}$  NMR (126 MHz,  $\text{CD}_2\text{Cl}_2$ )  $\delta$  202.4 (C), 192.6 (C), 155.9 (C), 79.3 (C), 58.2 (CH<sub>2</sub>), 46.4 (CH), 40.4 (CH<sub>2</sub>), 31.2 (CH<sub>2</sub>), 28.7 (CH<sub>3</sub>), 24.5 (CH<sub>2</sub>), 21.8 (CH<sub>3</sub>), 14.9 (CH<sub>3</sub>). IR (ATR-FTIR),  $\text{cm}^{-1}$ : 3387 (m), 2797 (w), 2929 (w), 1717 (w), 1683 (s), 1512 (s), 1310 (m), 1170 (m), 1051 (s), 541 (m). HRMS-Cl ( $m/z$ ):  $[\text{M} + \text{Na}]^+$  calcd for  $\text{C}_{14}\text{H}_{25}\text{NNaO}_4\text{S}$ , 326.1397; found, 326.1399.  $[\alpha]_{\text{D}}^{20} +8.0$  ( $c$  1.0,  $\text{CH}_2\text{Cl}_2$ ).

### Synthesis of the acid **13**:

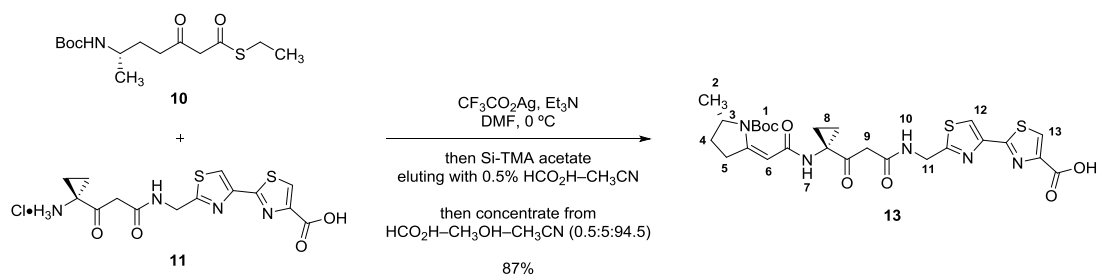

Silver trifluoroacetate (164 mg, 742  $\mu\text{mol}$ , 2.00 equiv) was added to a solution of triethylamine (207  $\mu\text{L}$ , 1.48 mmol, 4.00 equiv) and the amine **11** (149 mg, 371  $\mu\text{mol}$ , 1 equiv) in *N,N*-dimethylformamide (2.7 mL) at  $0\text{ }^\circ\text{C}$ . A solution of the  $\beta$ -ketothioester **10** (146 mg, 482  $\mu\text{mol}$ , 1.30 equiv) in *N,N*-dimethylformamide (1.2 mL) was added dropwise via syringe to the reaction mixture. The reaction vessel was covered with foil to exclude light and the reaction mixture was stirred for 1 h at  $0\text{ }^\circ\text{C}$ . The heterogeneous product mixture was filtered through a fritted funnel the filtrate was concentrated. The residue obtained was applied to a column containing trimethylamine acetate-functionalized silica gel (Si-TMA acetate; eluting with 0.5% formic acid–acetonitrile). The fractions containing product were collected, combined, and concentrated. The concentrated product was diluted with a solution containing 0.5% formic acid–5% methanol–acetonitrile (600 mL). The diluted product solution was concentrated. This process was repeated until LC/MS analysis indicated full conversion to the acid **13** (white solid, 185 mg, 87%).

$^1\text{H}$  NMR (500 MHz,  $\text{DMSO}-d_6$ )  $\delta$  13.12 (bs, 1H), 8.94 (t,  $J = 6.0$  Hz, 1H,  $\text{H}_{10}$ ), 8.47 (bs, 1H,  $\text{H}_7$ ), 8.46 (s, 1H,  $\text{H}_{13}$ ), 8.23 (s, 1H,  $\text{H}_{12}$ ), 6.55 (s, 1H,  $\text{H}_6$ ), 4.59 (d,  $J = 5.9$  Hz, 2H,  $\text{H}_{11}$ ), 4.17 (app p,  $J = 6.6$  Hz, 1H,  $\text{H}_3$ ), 3.55 (s, 2H,  $\text{H}_9$ ), 3.41 (dd,  $J = 18.2, 8.7$  Hz, 1H,  $\text{H}_5$ ), 2.82 (dt,  $J = 18.6, 9.9$  Hz, 1H,  $\text{H}_5$ ), 1.89 (ddd,  $J = 20.6, 12.2, 8.6$  Hz, 1H,  $\text{H}_4$ ), 1.55 (app t,  $J = 10.4$  Hz, 1H,  $\text{H}_4$ ), 1.47 (s, 9H,  $\text{H}_1$ ), 1.39 – 1.34 (m, 2H,  $\text{H}_8$ ), 1.15 (d,  $J = 6.3$  Hz, 3H,  $\text{H}_2$ ), 1.05 – 0.99 (m, 2H,  $\text{H}_8$ ).  $^{13}\text{C}$  NMR (126 MHz,  $\text{DMSO}-d_6$ )  $\delta$  204.7 (C), 171.4 (C), 169.0 (C), 167.0 (C), 163.1 (C), 162.1 (C), 153.3 (C), 151.2 (C), 148.3 (C), 147.1 (C), 128.8 (CH), 118.2 (CH), 98.4 (CH), 80.9 (C), 56.0 (CH), 46.3 ( $\text{CH}_2$ ), 40.6 (C), 40.5 ( $\text{CH}_2$ ), 28.9 ( $\text{CH}_2$ ), 27.8 ( $\text{CH}_2$ ), 27.8 ( $\text{CH}_3$ ), 19.5 ( $\text{CH}_2$ ), 19.5 ( $\text{CH}_2$ ), 19.3 ( $\text{CH}_3$ ). IR (ATR-FTIR),  $\text{cm}^{-1}$ : 3329 (m), 2978 (w), 1722 (w), 1711 (w), 1673 (s), 1641 (w), 1586 (m), 1543 (m), 1518 (m), 1286 (s), 1230 (s), 1180 (s), 1157 (s), 1142 (s), 780 (m). HRMS-CI ( $m/z$ ):  $[\text{M} + \text{H}]^+$  calcd for  $\text{C}_{26}\text{H}_{32}\text{N}_5\text{O}_7\text{S}_2$ , 590.1738; found, 590.1731.  $[\alpha]_{\text{D}}^{20} +13.0$  ( $c$  1.0,  $\text{DMSO}$ ).



### Synthesis of the amide **14a**:

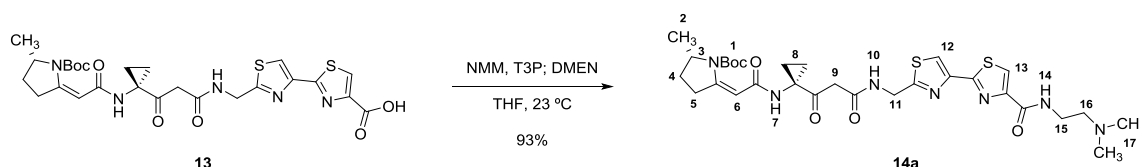

A solution of T3P in ethyl acetate (50 wt%, 10.6  $\mu\text{L}$ , 17.8  $\mu\text{mol}$ , 1.50 equiv) and 4-methylmorpholine (6.5  $\mu\text{L}$ , 59.4  $\mu\text{mol}$ , 5.00 equiv) were added in sequence to a solution of the acid **13** (7.0 mg, 11.9  $\mu\text{mol}$ , 1 equiv) in tetrahydrofuran (240  $\mu\text{L}$ ) at 23 °C. The reaction mixture was stirred for 20 min at 23 °C. A solution of *N,N*-dimethylethylenediamine (3.2  $\mu\text{L}$ , 29.7  $\mu\text{mol}$ , 2.50 equiv) in tetrahydrofuran (50  $\mu\text{L}$ ) was added to the reaction mixture. The resulting mixture was stirred for 7 h at 23 °C. The product mixture was concentrated. The concentrated product mixture was diluted with ethyl acetate (10 mL). The diluted product mixture was poured into a separatory funnel that had been charged with saturated aqueous sodium bicarbonate solution (5.0 mL) and the layers that formed were separated. The aqueous layer was extracted with ethyl acetate ( $2 \times 10$  mL). The organic layers were combined and the combined organic layers were dried over sodium sulfate. The dried solution was filtered and the filtrate was concentrated to provide the amide **14a** as a white solid (7.3 mg, 93%). The product so obtained was used without further purification.

$^1\text{H}$  NMR (400 MHz,  $\text{DMSO-}d_6$ )  $\delta$  8.96 (t,  $J = 5.7$  Hz, 1H,  $\text{H}_{10}$ ), 8.48 (bs, 1H,  $\text{H}_7$ ), 8.26 (s, 1H,  $\text{H}_{13}$ ), 8.24 (bs, 1H,  $\text{H}_{14}$ ), 8.19 (s, 1H,  $\text{H}_{12}$ ), 6.55 (s, 1H,  $\text{H}_6$ ), 4.59 (d,  $J = 5.4$  Hz, 2H,  $\text{H}_{11}$ ), 4.17 (app p,  $J = 5.7$  Hz, 1H,  $\text{H}_3$ ), 3.55 (s, 2H,  $\text{H}_9$ ), 3.47 – 3.35 (m, 3H,  $\text{H}_5$ ,  $\text{H}_{15}$ ), 2.82 (dt,  $J = 19.0$ , 9.9 Hz, 1H,  $\text{H}_5$ ), 2.41 (t,  $J = 6.2$  Hz, 2H,  $\text{H}_{16}$ ), 2.18 (s, 6H,  $\text{H}_{17}$ ), 1.97 – 1.81 (m, 1H,  $\text{H}_4$ ), 1.55 (app t,  $J = 10.4$  Hz, 1H,  $\text{H}_4$ ), 1.47 (s, 9H,  $\text{H}_1$ ), 1.39 – 1.33 (m, 2H,  $\text{H}_8$ ), 1.15 (d,  $J = 5.8$  Hz, 3H,  $\text{H}_2$ ), 1.06 – 0.96 (m, 2H,  $\text{H}_8$ ).  $^{13}\text{C}$  NMR (101 MHz,  $\text{DMSO-}d_6$ )  $\delta$  204.7 (C), 171.6 (C), 169.0 (C), 167.1 (C), 161.9 (C), 160.2 (C), 153.3 (C), 151.2 (C), 150.8 (C), 147.2 (C), 124.1 (CH), 118.2 (CH), 98.4 (CH), 80.9 (C), 58.1 ( $\text{CH}_2$ ), 56.0 (CH), 46.4 ( $\text{CH}_2$ ), 45.2 ( $\text{CH}_3$ ), 40.7 (C), 40.1 ( $\text{CH}_2$ ), 36.7 ( $\text{CH}_2$ ), 28.9 ( $\text{CH}_2$ ), 27.8 ( $\text{CH}_2$ ), 27.8 ( $\text{CH}_3$ ), 19.5 ( $\text{CH}_2$ ), 19.5 ( $\text{CH}_2$ ), 19.3 ( $\text{CH}_3$ ). IR (ATR-FTIR),  $\text{cm}^{-1}$ : 3278 (br w), 2975 (w), 2931 (w), 1703 (m), 1648 (s), 1603 (m), 1549 (m), 1291 (m), 1158 (s). HRMS-CI ( $m/z$ ):  $[\text{M} + \text{H}]^+$  calcd for  $\text{C}_{30}\text{H}_{42}\text{N}_7\text{O}_6\text{S}_2$ , 660.2633; found, 660.2631.  $[\alpha]_{\text{D}}^{20} +25.0$  ( $c$  1.0,  $\text{CH}_3\text{OH}$ ).

### Synthesis of the lactam **15a**:

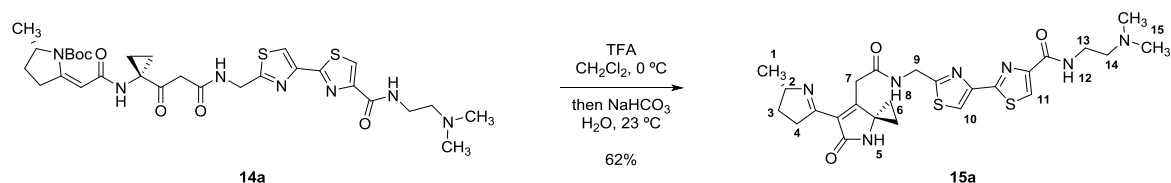

Trifluoroacetic acid (751  $\mu$ L, 9.82 mmol, 120 equiv) was added dropwise via syringe to a solution of the amide **14a** (54.0 mg, 81.8  $\mu$ mol, 1 equiv) in dichloromethane (1.6 mL) at 0 °C. The reaction mixture was stirred for 14 h at 0 °C. The reaction mixture was concentrated and the concentrated reaction mixture was diluted with saturated aqueous sodium bicarbonate solution (4.0 mL). The diluted reaction mixture was stirred for 1 h at 23 °C. The product mixture was diluted sequentially with water (10 mL) and ethyl acetate (30 mL). The diluted product mixture was transferred to a separatory funnel and the layers that formed were separated. The aqueous layer was extracted with ethyl acetate (5  $\times$  30 mL). The organic layers were combined and the combined organic layers were dried over sodium sulfate. The dried solution was filtered and the filtrate was concentrated to provide the lactam **15a** as a light yellow solid (27.5 mg, 62%). The product so obtained was used without further purification.

<sup>1</sup>H NMR (500 MHz, DMSO-*d*<sub>6</sub>)  $\delta$  10.28 (t,  $J$  = 6.0 Hz, 1H, H<sub>8</sub>), 8.60 (bs, 1H, H<sub>5</sub>), 8.28 – 8.23 (m, 2H, H<sub>11</sub>, H<sub>12</sub>), 8.19 (s, 1H, H<sub>10</sub>), 4.66 – 4.57 (m, 2H, H<sub>9</sub>), 4.18 – 4.07 (m, 1H, H<sub>2</sub>), 3.39 (app q,  $J$  = 6.5 Hz, 2H, H<sub>13</sub>), 3.35 – 3.30 (m, 2H, H<sub>7</sub>), 3.15 – 3.06 (m, 1H, H<sub>4</sub>), 2.87 (dt,  $J$  = 17.8, 8.8 Hz, 1H, H<sub>4</sub>), 2.45 (t,  $J$  = 6.7 Hz, 2H, H<sub>14</sub>), 2.21 (s, 6H, H<sub>15</sub>), 2.12 – 2.06 (m, 1H, H<sub>3</sub>), 1.76 – 1.61 (m, 2H, H<sub>6</sub>), 1.42 – 1.33 (m, 3H, H<sub>3</sub>, H<sub>6</sub>), 1.19 (d,  $J$  = 6.6 Hz, 3H, H<sub>1</sub>). <sup>13</sup>C NMR (126 MHz, DMSO-*d*<sub>6</sub>)  $\delta$  171.1 (C), 169.6 (C), 168.3 (C), 168.2 (C), 161.8 (C), 160.2 (C), 157.6 (C), 150.8 (C), 147.4 (C), 127.4 (C), 124.2 (CH), 118.0 (CH), 66.5 (CH), 58.0 (CH<sub>2</sub>), 45.3 (C), 45.1 (CH<sub>3</sub>), 40.4 (CH<sub>2</sub>), 36.6 (CH<sub>2</sub>), 36.5 (CH<sub>2</sub>), 33.5 (CH<sub>2</sub>), 29.7 (CH<sub>2</sub>), 21.9 (CH<sub>3</sub>), 11.8 (CH<sub>2</sub>), 11.7 (CH<sub>2</sub>). HRMS-Cl (m/z): [M + H]<sup>+</sup> calcd for C<sub>25</sub>H<sub>32</sub>N<sub>7</sub>O<sub>3</sub>S<sub>2</sub>, 542.2003; found, 542.2016.  $[\alpha]_D^{20}$  –6.0 ( $c$  1.5, DMSO- *d*<sub>6</sub>).

### Synthesis of the pyridone **16**:

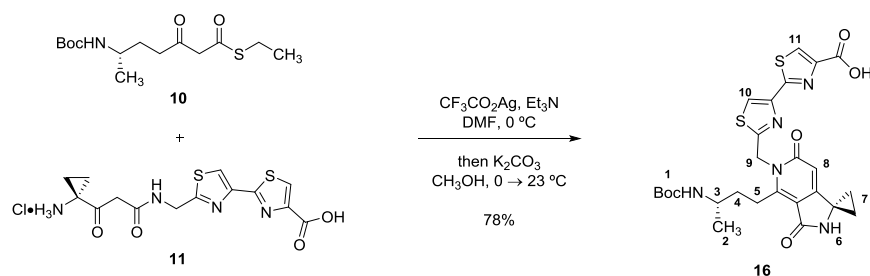

Silver trifluoroacetate (410 mg, 1.86 mmol, 2.00 equiv) was added to a solution of triethylamine (518  $\mu\text{L}$ , 3.71 mmol, 4.00 equiv) and the amine **11** (374 mg, 930  $\mu\text{mol}$ , 1 equiv) in *N,N*-dimethylformamide (6.0 mL) at  $0\text{ }^\circ\text{C}$ . A solution of the  $\beta$ -ketothioester **10** (366 mg, 1.21 mmol, 1.30 equiv) in *N,N*-dimethylformamide (2.0 mL) was added dropwise via syringe to the reaction mixture. The reaction vessel was covered with foil to exclude light and the reaction mixture was stirred for 1 h at  $0\text{ }^\circ\text{C}$ . Potassium carbonate (385 mg, 2.79 mmol, 3.00 equiv) and methanol (8.0 mL) were then added in sequence to the reaction mixture at  $0\text{ }^\circ\text{C}$ . The reaction mixture was stirred for 30 min at  $0\text{ }^\circ\text{C}$ . The heterogeneous product mixture was filtered through a fritted funnel. The filter cake was washed with methanol (10 mL). The filtrates were combined and the combined filtrates were concentrated. The residue obtained was applied to a trimethylamine acetate-functionalized silica column (Si-TMA acetate; eluting with 0.5% formic acid–acetonitrile). The fractions containing the product **16** were collected, combined, and concentrated to provide the pyridone **16** as a white solid (414 mg, 78%).

$^1\text{H}$  NMR (600 MHz,  $\text{DMSO-}d_6$ )  $\delta$  8.48 (bs, 1H,  $\text{H}_6$ ), 8.39 (s, 1H,  $\text{H}_{11}$ ), 8.25 (s, 1H,  $\text{H}_{10}$ ), 6.80 (d,  $J = 8.0\text{ Hz}$ , 1H), 6.17 (s, 1H,  $\text{H}_8$ ), 5.60 (d,  $J = 16.0\text{ Hz}$ , 1H,  $\text{H}_9$ ), 5.49 (d,  $J = 15.9\text{ Hz}$ , 1H,  $\text{H}_9$ ), 3.63 – 3.52 (m, 1H,  $\text{H}_3$ ), 3.53 – 3.45 (m, 1H,  $\text{H}_5$ ), 3.32 – 3.14 (m, 1H,  $\text{H}_5$ ), 1.75 – 1.60 (m, 2H,  $\text{H}_4$ ), 1.37 (app t,  $J = 2.7\text{ Hz}$ , 2H,  $\text{H}_7$ ), 1.35 (app t,  $J = 2.8\text{ Hz}$ , 1H,  $\text{H}_7$ ), 1.30 (s, 9H,  $\text{H}_1$ ), 1.06 (d,  $J = 6.6\text{ Hz}$ , 3H,  $\text{H}_2$ ).  $^{13}\text{C}$  NMR (151 MHz,  $\text{DMSO-}d_6$ )  $\delta$  166.9 (C), 166.7 (C), 162.3 (C), 161.8 (C), 161.6 (C), 159.9 (C), 155.1 (C), 153.0 (C), 149.3 (C), 147.2 (C), 128.3 (CH), 118.7 (CH), 109.7 (C), 103.3 (CH), 77.4 (C), 46.1 (CH), 44.2 ( $\text{CH}_2$ ), 39.7 (C), 35.5 ( $\text{CH}_2$ ), 28.2 ( $\text{CH}_3$ ), 24.1 ( $\text{CH}_2$ ), 20.7 ( $\text{CH}_3$ ), 15.2 ( $\text{CH}_2$ ). IR (ATR-FTIR),  $\text{cm}^{-1}$ : 3327 (w), 3121 (w), 2971 (w), 2355 (br w), 1720 (w), 1702 (w), 1674 (m), 1649 (s), 1571 (m), 1518 (m), 1171 (m), 578 (s). HRMS-CI ( $m/z$ ):  $[\text{M} + \text{H}]^+$  calcd for  $\text{C}_{26}\text{H}_{30}\text{N}_5\text{O}_6\text{S}_2$ , 572.1632; found, 572.1630.  $[\alpha]_{\text{D}}^{20} -64.0$  ( $c$  0.5,  $\text{DMSO}$ ).

### Synthesis of the amide **S2**:

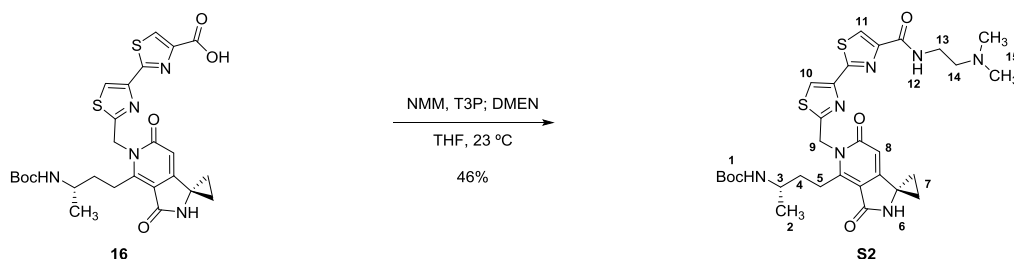

A solution of T3P in ethyl acetate (50 wt%, 54.7  $\mu\text{L}$ , 91.8  $\mu\text{mol}$ , 1.50 equiv) and 4-methylmorpholine (33.7  $\mu\text{L}$ , 306  $\mu\text{mol}$ , 5.00 equiv) were added in sequence to a solution of the acid **16** (35.0 mg, 61.2  $\mu\text{mol}$ , 1 equiv) in tetrahydrofuran (790  $\mu\text{L}$ ) at 23 °C. *N,N*-Dimethylethylenediamine (16.7  $\mu\text{L}$ , 153  $\mu\text{mol}$ , 2.50 equiv) was then added to the reaction mixture. The resulting mixture was stirred for 7 h at 23 °C. The product mixture was concentrated. The concentrated product mixture was diluted with ethyl acetate (10 mL). The diluted product mixture was poured into a separatory funnel that had been charged with saturated aqueous sodium bicarbonate solution (5.0 mL) and the layers that formed were separated. The aqueous layer was extracted with ethyl acetate ( $2 \times 10$  mL). The organic layers were combined and the combined organic layers were dried over sodium sulfate. The dried solution was filtered and the filtrate was concentrated to provide the amide **S2** as a white solid (18.1 mg, 46%). The product so obtained was used without further purification.

$^1\text{H}$  NMR (500 MHz,  $\text{CD}_2\text{Cl}_2$ )  $\delta$  8.06 (s, 1H, H<sub>11</sub>), 8.01 (s, 1H, H<sub>10</sub>), 7.64 (bs, 1H, H<sub>12</sub>), 6.33 (bs, 1H, H<sub>6</sub>), 6.01 (s, 1H, H<sub>8</sub>), 5.62 (d,  $J = 15.0$  Hz, 1H, H<sub>9</sub>), 5.55 (d,  $J = 14.2$  Hz, 1H, H<sub>9</sub>), 5.38 (d,  $J = 7.4$  Hz, 1H), 3.82 – 3.74 (m, 1H, H<sub>3</sub>), 3.66 – 3.58 (m, 1H, H<sub>5</sub>), 3.51 (app q,  $J = 5.9$  Hz, 2H, H<sub>13</sub>), 3.48 – 3.41 (m, 1H, H<sub>5</sub>), 2.51 (t,  $J = 6.1$  Hz, 2H, H<sub>14</sub>), 2.27 (s, 6H, H<sub>15</sub>), 1.89 – 1.81 (m, 1H, H<sub>4</sub>), 1.80 – 1.69 (m, 1H, H<sub>4</sub>), 1.52 – 1.45 (m, 2H, H<sub>7</sub>), 1.41 (s, 9H, H<sub>1</sub>), 1.37 – 1.32 (m, 2H, H<sub>7</sub>), 1.19 (d,  $J = 6.5$  Hz, 3H, H<sub>2</sub>).  $^{13}\text{C}$  NMR (126 MHz,  $\text{CD}_2\text{Cl}_2$ )  $\delta$  168.4 (C), 166.0 (C), 163.1 (C), 162.7 (C), 161.2 (C), 160.5 (C), 156.1 (C), 154.4 (C), 151.8 (C), 148.5 (C), 123.8 (CH), 119.2 (CH), 110.3 (C), 103.9 (CH), 79.2 (C), 58.7 (CH<sub>2</sub>), 47.1 (CH), 45.7 (CH<sub>3</sub>), 45.1 (CH<sub>2</sub>), 40.6 (C), 37.5 (CH<sub>2</sub>), 36.1 (CH<sub>2</sub>), 28.7 (CH<sub>3</sub>), 25.0 (CH<sub>2</sub>), 21.3 (CH<sub>3</sub>), 16.2 (CH<sub>2</sub>). IR (ATR-FTIR),  $\text{cm}^{-1}$ : 3327 (br w), 2972 (w), 1694 (w), 1651 (s), 1541 (m), 1250 (m), 1165 (m), 568 (m). HRMS-CI ( $m/z$ ):  $[\text{M} + \text{H}]^+$  calcd for  $\text{C}_{30}\text{H}_{40}\text{N}_7\text{O}_5\text{S}_2$ , 642.2527; found, 642.2532.  $[\alpha]_{\text{D}}^{20}$  –125.8 ( $c$  0.93,  $\text{CH}_3\text{OH}$ ).

### Synthesis of the amide **17a**:

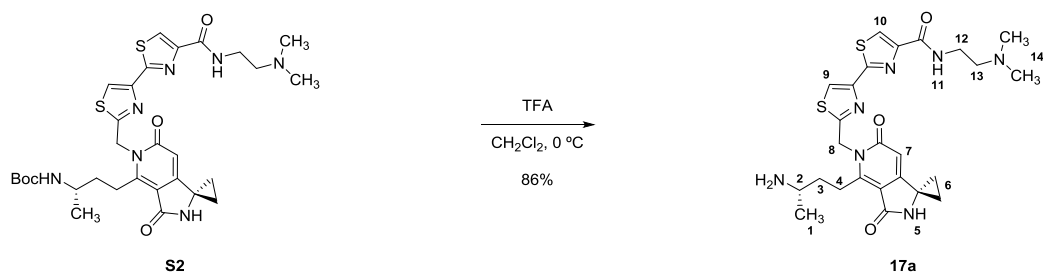

Trifluoroacetic acid (206  $\mu\text{L}$ , 2.69 mmol, 120 equiv) was added dropwise via syringe to a solution of the amide **S2** (14.4 mg, 22.4  $\mu\text{mol}$ , 1 equiv) in dichloromethane (560  $\mu\text{L}$ ) at 0  $^{\circ}\text{C}$ . The reaction mixture was stirred for 14 h at 0  $^{\circ}\text{C}$ . The reaction mixture was concentrated. The concentrated product mixture was diluted with chloroform (10 mL). The diluted product mixture was poured into a separatory funnel that had been charged with saturated aqueous sodium bicarbonate solution (5.0 mL) and the layers that formed were separated. The aqueous layer was extracted with chloroform (2  $\times$  10 mL). The organic layers were combined and the combined organic layers were dried over sodium sulfate. The dried solution was filtered and the filtrate was concentrated to provide the amide **17a** as a white solid (10.5 mg, 86%). The product so obtained was used without further purification.

$^1\text{H}$  NMR (400 MHz,  $\text{CD}_3\text{OD}$ )  $\delta$  8.24 (s, 1H, H<sub>10</sub>), 8.18 (s, 1H, H<sub>9</sub>), 6.19 (s, 1H, H<sub>7</sub>), 5.73 (d,  $J$  = 15.4 Hz, 1H, H<sub>8</sub>), 5.68 (d,  $J$  = 15.5 Hz, 1H, H<sub>8</sub>), 3.75 – 3.62 (m, 1H, H<sub>4</sub>), 3.60 – 3.50 (m, 3H, H<sub>4</sub>, H<sub>12</sub>), 3.10 – 3.02 (m, 1H, H<sub>2</sub>), 2.59 (t,  $J$  = 6.7 Hz, 2H, H<sub>13</sub>), 2.32 (s, 6H, H<sub>14</sub>), 1.87 – 1.72 (m, 2H, H<sub>3</sub>), 1.58 – 1.50 (m, 2H, H<sub>6</sub>), 1.47 – 1.40 (m, 2H, H<sub>6</sub>), 1.18 (d,  $J$  = 6.3 Hz, 3H, H<sub>1</sub>).  $^{13}\text{C}$  NMR (151 MHz,  $\text{CD}_3\text{OD}$ )  $\delta$  169.5 (C), 167.5 (C), 165.0 (C), 163.7 (C), 163.4 (C), 162.5 (C), 154.9 (C), 151.7 (C), 149.1 (C), 125.2 (CH), 120.2 (CH), 112.3 (C), 104.4 (CH), 59.3 (CH<sub>2</sub>), 47.7 (CH), 46.1 (CH<sub>2</sub>), 45.5 (CH<sub>3</sub>), 41.5 (C), 39.0 (CH<sub>2</sub>), 38.0 (CH<sub>2</sub>), 25.5 (CH<sub>2</sub>), 22.5 (CH<sub>3</sub>), 16.3 (CH<sub>2</sub>). IR (ATR-FTIR),  $\text{cm}^{-1}$ : 3355 (br w), 2956 (w), 1691 (w), 1648 (s), 1572 (w), 1545 (w), 1288 (m), 568 (m). HRMS-Cl ( $m/z$ ):  $[\text{M} + \text{H}]^+$  calcd for  $\text{C}_{25}\text{H}_{32}\text{N}_7\text{O}_3\text{S}_2$ , 542.2003; found, 542.2004.  $[\alpha]_{\text{D}}^{20}$   $-13.0$  ( $c$  1.0,  $\text{CH}_3\text{OH}$ ).

### Synthesis of the amide **14b**:

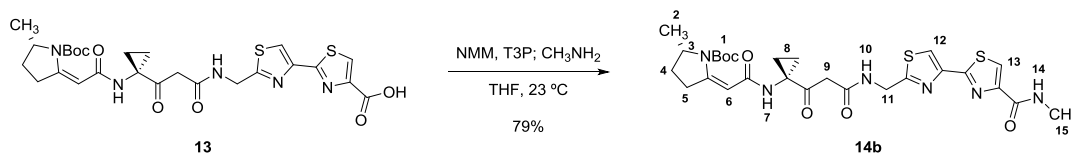

A solution of T3P in ethyl acetate (50 wt%, 22.7  $\mu\text{L}$ , 38.2  $\mu\text{mol}$ , 1.50 equiv) and 4-methylmorpholine (14.0  $\mu\text{L}$ , 127  $\mu\text{mol}$ , 5.00 equiv) were added in sequence to a solution of the acid **13** (15.0 mg, 25.4  $\mu\text{mol}$ , 1 equiv) in tetrahydrofuran (330  $\mu\text{L}$ ) at 23 °C. The reaction mixture was stirred for 20 min at 23 °C. A solution of methylamine in tetrahydrofuran (2.00 M, 23  $\mu\text{L}$ , 63.6  $\mu\text{mol}$ , 2.50 equiv) was then added to the reaction mixture. The resulting mixture was stirred for 7 h at 23 °C. The product mixture was concentrated. The residue obtained was purified by flash-column chromatography (eluting with dichloromethane initially, grading to 10% methanol–dichloromethane, linear gradient) to provide the amide **14b** as an off-white solid (12.1 mg, 79%).

<sup>1</sup>H NMR (500 MHz, CD<sub>2</sub>Cl<sub>2</sub>)  $\delta$  8.05 (s, 1H, H<sub>13</sub>), 8.04 (bs, 1H, H<sub>10</sub>), 7.93 (s, 1H, H<sub>12</sub>), 7.38 (bs, 1H, H<sub>14</sub>), 6.55 (s, 1H, H<sub>6</sub>), 6.23 (bs, 1H, H<sub>7</sub>), 4.76 (d,  $J$  = 6.0 Hz, 2H, H<sub>11</sub>), 4.23 (app p,  $J$  = 6.8 Hz, 1H, H<sub>3</sub>), 3.66 (s, 2H, H<sub>9</sub>), 3.47 (dd,  $J$  = 18.3, 8.7 Hz, 1H, H<sub>5</sub>), 2.98 (d,  $J$  = 5.1 Hz, 3H, H<sub>15</sub>), 2.89 (dddd,  $J$  = 18.3, 11.1, 8.3, 2.2 Hz, 1H, H<sub>5</sub>), 1.92 (tt,  $J$  = 12.1, 8.5 Hz, 1H, H<sub>4</sub>), 1.62 (app q,  $J$  = 4.4 Hz, 2H, H<sub>8</sub>), 1.56 (dd,  $J$  = 12.2, 8.6 Hz, 1H, H<sub>4</sub>), 1.18 (d,  $J$  = 6.5 Hz, 3H, H<sub>2</sub>), 1.17 – 1.13 (m, 2H, H<sub>8</sub>). <sup>13</sup>C NMR (126 MHz, CD<sub>2</sub>Cl<sub>2</sub>)  $\delta$  206.1 (C), 170.6 (C), 170.4 (C), 167.2 (C), 163.0 (C), 161.9 (C), 156.9 (C), 152.4 (C), 151.6 (C), 148.9 (C), 123.5 (CH), 117.6 (CH), 97.2 (CH), 82.2 (C), 57.5 (CH), 45.6 (CH<sub>2</sub>), 42.0 (C), 41.7 (CH<sub>2</sub>), 30.2 (CH<sub>2</sub>), 28.9 (CH<sub>2</sub>), 28.5 (CH<sub>3</sub>), 26.3 (CH<sub>3</sub>), 21.6 (CH<sub>2</sub>), 21.6 (CH<sub>2</sub>), 19.9 (CH<sub>3</sub>). IR (ATR-FTIR), cm<sup>-1</sup>: 3295 (br w), 2975 (w), 2931 (w), 1706 (m), 1651 (s), 1606 (m), 1547 (m), 1289 (m), 1156 (s), 771 (m). HRMS-CI (m/z): [M + H]<sup>+</sup> calcd for C<sub>27</sub>H<sub>35</sub>N<sub>6</sub>O<sub>6</sub>S<sub>2</sub>, 603.2054; found, 603.2053. [ $\alpha$ ]<sub>D</sub><sup>20</sup> +36.1 (c 0.83, CH<sub>2</sub>Cl<sub>2</sub>).

### Synthesis of the lactam **15b**:

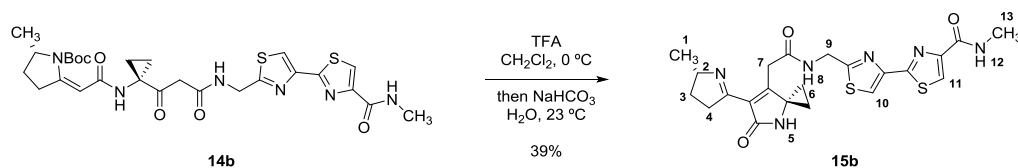

Trifluoroacetic acid (216  $\mu$ L, 2.83 mmol, 120 equiv) was added dropwise via syringe to a solution of the amide **14b** (14.2 mg, 23.6  $\mu$ mol, 1 equiv) in dichloromethane (590  $\mu$ L) at 0 °C. The reaction mixture was stirred for 14 h at 0 °C. The reaction mixture was concentrated. The concentrated reaction mixture was diluted with saturated aqueous sodium bicarbonate solution (400  $\mu$ L). The diluted reaction mixture was stirred for 1 h at 23 °C. The product mixture was diluted sequentially with water (1.0 mL) and ethyl acetate (3.0 mL). The diluted product mixture was transferred to a separatory funnel and the layers that formed were separated. The aqueous layer was extracted with ethyl acetate (5  $\times$  3.0 mL). The organic layers were combined and the combined organic layers were dried over sodium sulfate. The dried solution was filtered and the filtrate was concentrated to provide the lactam **15b** as a light yellow solid (4.5 mg, 39%). The product so obtained was used without further purification.

<sup>1</sup>H NMR (500 MHz, DMSO-*d*<sub>6</sub>)  $\delta$  10.28 (t,  $J$  = 6.0 Hz, 1H, H<sub>8</sub>), 8.60 (bs, 1H, H<sub>5</sub>), 8.41 – 8.34 (m, 1H, H<sub>12</sub>), 8.25 (s, 1H, H<sub>11</sub>), 8.17 (s, 1H, H<sub>10</sub>), 4.65 – 4.57 (m, 2H, H<sub>9</sub>), 4.17 – 4.07 (m, 1H, H<sub>2</sub>), 3.38 – 3.26 (m, 2H, H<sub>7</sub>), 3.15 – 3.05 (m, 1H, H<sub>4</sub>), 2.91 – 2.85 (m, 1H, H<sub>4</sub>), 2.81 (d,  $J$  = 4.8 Hz, 3H, H<sub>13</sub>), 2.14 – 2.03 (m, 1H, H<sub>3</sub>), 1.73 – 1.61 (m, 2H, H<sub>6</sub>), 1.42 – 1.29 (m, 3H, H<sub>3</sub>, H<sub>6</sub>), 1.19 (d,  $J$  = 6.7 Hz, 3H, H<sub>1</sub>). <sup>13</sup>C NMR (126 MHz, DMSO-*d*<sub>6</sub>)  $\delta$  171.1 (C), 169.6 (C), 168.4 (C), 168.2 (C), 161.7 (C), 160.9 (C), 157.7 (C), 150.9 (C), 147.5 (C), 127.4 (C), 123.8 (CH), 117.8 (CH), 66.5 (CH), 45.3 (C), 40.4 (CH<sub>2</sub>), 36.5 (CH<sub>2</sub>), 33.5 (CH<sub>2</sub>), 29.7 (CH<sub>2</sub>), 25.8 (CH<sub>3</sub>), 21.9 (CH<sub>3</sub>), 11.8 (CH<sub>2</sub>), 11.8 (CH<sub>2</sub>). HRMS-Cl (m/z): [M + H]<sup>+</sup> calcd for C<sub>22</sub>H<sub>25</sub>N<sub>6</sub>O<sub>3</sub>S<sub>2</sub>, 485.1424; found, 485.1418. [ $\alpha$ ]<sub>D</sub><sup>20</sup> -2.3 (*c* 1.3, DMSO-*d*<sub>6</sub>).

### Synthesis of the amide **S3**:

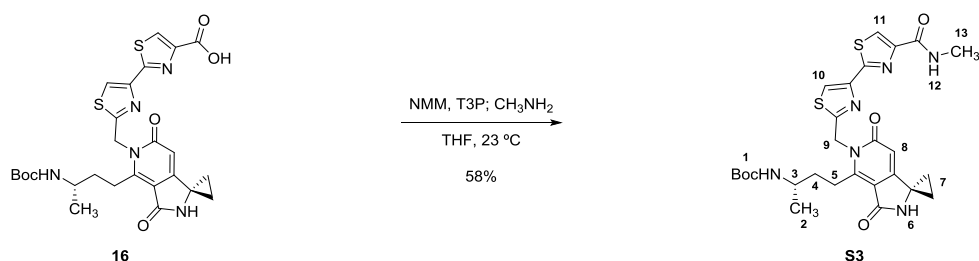

A solution of T3P in ethyl acetate (50 wt%, 54.7  $\mu\text{L}$ , 91.8  $\mu\text{mol}$ , 1.50 equiv) and 4-methylmorpholine (33.7  $\mu\text{L}$ , 306  $\mu\text{mol}$ , 5.00 equiv) were added in sequence to a solution of the acid **16** (35.0 mg, 61.2  $\mu\text{mol}$ , 1 equiv) in tetrahydrofuran (790  $\mu\text{L}$ ) at 23  $^\circ\text{C}$ . A solution of methylamine in tetrahydrofuran (2.00 M, 77  $\mu\text{L}$ , 153  $\mu\text{mol}$ , 2.50 equiv) was then added to the reaction mixture. The resulting mixture was stirred for 7 h at 23  $^\circ\text{C}$ . The product mixture was concentrated. The concentrated product mixture was diluted with ethyl acetate (10 mL). The diluted product mixture was poured into a separatory funnel that had been charged with saturated aqueous sodium bicarbonate solution (5.0 mL) and the layers that formed were separated. The aqueous layer was extracted with ethyl acetate ( $2 \times 10$  mL). The organic layers were combined and the combined organic layers were dried over sodium sulfate. The dried solution was filtered and the filtrate was concentrated to provide the amide **S3** as a white solid (20.8 mg, 58%). The product so obtained was used without further purification.

$^1\text{H}$  NMR (600 MHz,  $\text{CD}_3\text{OD}$ )  $\delta$  8.22 (s, 1H, H<sub>11</sub>), 8.16 (s, 1H, H<sub>10</sub>), 6.16 (s, 1H, H<sub>8</sub>), 5.71 (d,  $J = 15.8$  Hz, 1H, H<sub>9</sub>), 5.65 (d,  $J = 15.8$  Hz, 1H, H<sub>9</sub>), 3.74 (app h,  $J = 6.4$  Hz, 1H, H<sub>3</sub>), 3.60 – 3.50 (m, 2H, H<sub>5</sub>), 2.96 (s, 3H, H<sub>13</sub>), 1.89 – 1.75 (m, 2H, H<sub>4</sub>), 1.54 – 1.51 (m, 2H, H<sub>7</sub>), 1.43 – 1.40 (m, 2H, H<sub>7</sub>), 1.37 (s, 9H, H<sub>1</sub>), 1.17 (d,  $J = 6.7$  Hz, 3H, H<sub>2</sub>).  $^{13}\text{C}$  NMR (151 MHz,  $\text{CD}_3\text{OD}$ )  $\delta$  169.4 (C), 167.4 (C), 164.9 (C), 164.0 (C), 163.7 (C), 162.5 (C), 157.9 (C), 155.1 (C), 151.8 (C), 149.3 (C), 124.9 (CH), 119.8 (CH), 112.2 (C), 104.3 (CH), 79.9 (C), 47.8 (CH), 45.9 (CH<sub>2</sub>), 41.5 (C), 36.8 (CH<sub>2</sub>), 28.9 (CH<sub>3</sub>), 26.3 (CH<sub>3</sub>), 25.9 (CH<sub>2</sub>), 21.2 (CH<sub>3</sub>), 16.3 (CH<sub>2</sub>). IR (ATR-FTIR),  $\text{cm}^{-1}$ : 3284 (br w), 2971 (w), 1694 (m), 1652 (s), 1573 (m), 1550 (m), 1167 (m), 570 (s). HRMS-CI (m/z):  $[\text{M} + \text{H}]^+$  calcd for  $\text{C}_{27}\text{H}_{33}\text{N}_6\text{O}_5\text{S}_2$ , 585.1948; found, 585.1948.  $[\alpha]_{\text{D}}^{20}$   $-101.2$  (c 0.85,  $\text{CH}_3\text{OH}$ ).



### Synthesis of the amide **17b**:

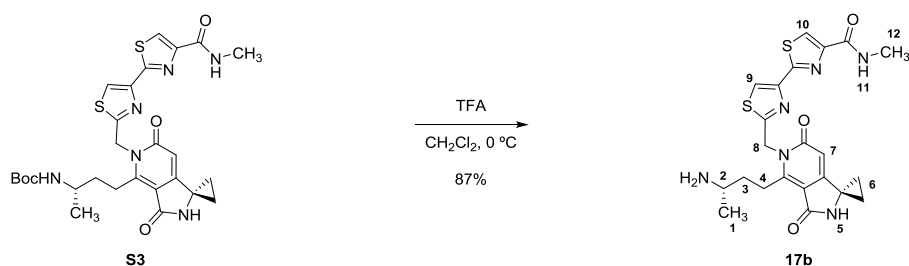

Trifluoroacetic acid (273  $\mu$ L, 3.57 mmol, 120 equiv) was added dropwise via syringe to a solution of the amide **S3** (17.4 mg, 29.8  $\mu$ mol, 1 equiv) in dichloromethane (740  $\mu$ L) at 0 °C. The reaction mixture was stirred for 14 h at 0 °C. The reaction mixture was concentrated. The concentrated product mixture was diluted with chloroform (10 mL). The diluted product mixture was poured into a separatory funnel that had been charged with saturated aqueous sodium bicarbonate solution (5.0 mL) and the layers that formed were separated. The aqueous layer was extracted with chloroform (2  $\times$  10 mL). The organic layers were combined and the combined organic layers were dried over sodium sulfate. The dried solution was filtered and the filtrate was concentrated to provide the amide **17b** as a white solid (12.6 mg, 87%). The product so obtained was used without further purification.

<sup>1</sup>H NMR (600 MHz, CD<sub>3</sub>OD)  $\delta$  8.24 (s, 1H, H<sub>9</sub>), 8.16 (s, 1H, H<sub>10</sub>), 6.21 (s, 1H, H<sub>7</sub>), 5.72 (d, J = 15.7 Hz, 1H, H<sub>8</sub>), 5.67 (d, J = 15.7 Hz, 1H, H<sub>8</sub>), 3.74 – 3.65 (m, 1H, H<sub>4</sub>), 3.62 – 3.51 (m, 1H, H<sub>4</sub>), 3.31 – 3.26 (m, 1H, H<sub>2</sub>), 2.96 (s, 3H, H<sub>12</sub>), 2.04 – 1.86 (m, 2H, H<sub>3</sub>), 1.58 – 1.50 (m, 2H, H<sub>6</sub>), 1.48 – 1.41 (m, 2H, H<sub>6</sub>), 1.30 (d, J = 6.6 Hz, 3H, H<sub>1</sub>). <sup>13</sup>C NMR (151 MHz, CD<sub>3</sub>OD)  $\delta$  169.6 (C), 167.3 (C), 164.8 (C), 164.0 (C), 163.7 (C), 162.3 (C), 153.7 (C), 151.8 (C), 149.1 (C), 124.8 (CH), 120.3 (CH), 112.5 (C), 104.8 (CH), 48.1 (CH), 46.0 (CH<sub>2</sub>), 41.6 (C), 36.4 (CH<sub>2</sub>), 26.4 (CH<sub>3</sub>), 25.0 (CH<sub>2</sub>), 20.3 (CH<sub>3</sub>), 16.4 (CH<sub>2</sub>). IR (ATR-FTIR), cm<sup>-1</sup>: 3419 (br w), 2926 (w), 2857 (w), 1688 (w), 1647 (s), 1556 (m), 1289 (w), 568 (m). HRMS-CI (m/z): [M + H]<sup>+</sup> calcd for C<sub>22</sub>H<sub>25</sub>N<sub>6</sub>O<sub>3</sub>S<sub>2</sub>, 485.1424; found, 485.1425. [ $\alpha$ ]<sub>D</sub><sup>20</sup> –29.0 (c 1.0, CH<sub>3</sub>OH).

Synthesis of the dimeric amide **14c**:

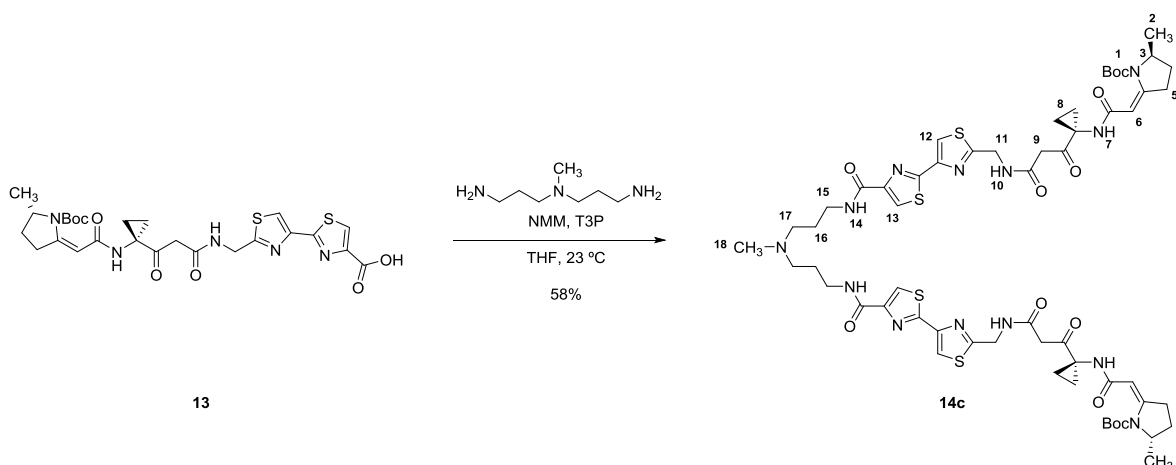

A solution of T3P in ethyl acetate (50 wt%, 50.5  $\mu\text{L}$ , 84.8  $\mu\text{mol}$ , 2.50 equiv) and 4-methylmorpholine (37.3  $\mu\text{L}$ , 339  $\mu\text{mol}$ , 10.00 equiv) were added in sequence to a solution of the acid **13** (20.0 mg, 33.9  $\mu\text{mol}$ , 1 equiv) in tetrahydrofuran (680  $\mu\text{L}$ ) at 23 °C. The reaction mixture was stirred for 20 min at 23 °C. A solution of *N,N*-bis(3-aminopropyl)methylamine (2.7  $\mu\text{L}$ , 17.0  $\mu\text{mol}$ , 0.50 equiv) in tetrahydrofuran (50  $\mu\text{L}$ ) was then added to the reaction mixture. The resulting mixture was stirred for 7 h at 23 °C. The product mixture was concentrated. The concentrated product mixture was diluted with ethyl acetate (10 mL). The diluted product mixture was poured into a separatory funnel that had been charged with saturated aqueous sodium bicarbonate solution (5.0 mL) and the layers that formed were separated. The aqueous layer was extracted with ethyl acetate ( $2 \times 10$  mL). The organic layers were combined and the combined organic layers were dried over sodium sulfate. The dried solution was filtered and the filtrate was concentrated to provide the dimeric amide **14c** as a white solid (12.5 mg, 58%). The product so obtained was used without further purification.

$^1\text{H}$  NMR (500 MHz,  $\text{CD}_2\text{Cl}_2$ )  $\delta$  8.21 – 8.14 (m, 2H,  $\text{H}_{10}$ ), 8.07 – 8.01 (m, 2H,  $\text{H}_{14}$ ), 8.01 (s, 2H,  $\text{H}_{13}$ ), 7.80 (s, 2H,  $\text{H}_{12}$ ), 6.76 (bs, 2H,  $\text{H}_7$ ), 6.57 (s, 2H,  $\text{H}_6$ ), 4.68 (d,  $J = 5.9$  Hz, 4H,  $\text{H}_{11}$ ), 4.28 – 4.16 (m, 2H,  $\text{H}_3$ ), 3.68 (s, 4H,  $\text{H}_9$ ), 3.55 – 3.49 (m, 4H,  $\text{H}_{15}$ ), 3.50 – 3.42 (m, 2H,  $\text{H}_5$ ), 2.95 – 2.77 (m, 2H,  $\text{H}_5$ ), 2.51 (t,  $J = 6.6$  Hz, 4H,  $\text{H}_{17}$ ), 2.28 (s, 3H,  $\text{H}_{18}$ ), 1.98 – 1.86 (m, 2H,  $\text{H}_4$ ), 1.87 – 1.80 (m, 4H,  $\text{H}_{16}$ ), 1.64 – 1.58 (m, 4H,  $\text{H}_8$ ), 1.60 – 1.52 (m, 2H,  $\text{H}_4$ ), 1.49 (s, 18H,  $\text{H}_1$ ), 1.17 (d,  $J = 6.5$  Hz, 6H,  $\text{H}_2$ ), 1.14 – 1.01 (m, 4H,  $\text{H}_8$ ).  $^{13}\text{C}$  NMR (126 MHz,  $\text{CD}_2\text{Cl}_2$ )  $\delta$  206.2 (C), 170.6 (C), 170.2 (C), 167.4 (C), 162.8 (C), 161.3 (C), 156.6 (C), 152.4 (C), 151.8 (C), 148.7 (C), 123.6 (CH), 117.6 (CH), 97.5 (CH), 82.1 (C), 57.4 (CH), 56.7 (CH<sub>2</sub>), 46.0 (CH<sub>2</sub>), 42.5 (CH<sub>3</sub>), 41.9 (C), 41.6 (CH<sub>2</sub>), 38.9 (CH<sub>2</sub>), 30.1 (CH<sub>2</sub>), 28.9 (CH<sub>2</sub>), 28.5 (CH<sub>3</sub>), 27.5 (CH<sub>2</sub>), 21.6 (CH<sub>2</sub>), 21.6 (CH<sub>2</sub>), 19.8 (CH<sub>3</sub>). IR (ATR-FTIR),  $\text{cm}^{-1}$ : 3282 (br w), 2974 (w), 2933 (w), 1708 (m), 1651 (s), 1608 (m), 1541 (s), 1315 (m), 1290 (s), 1156 (s), 1026 (m), 770 (m), 755 (m), 620 (w). HRMS-CI ( $m/z$ ):  $[\text{M} + \text{H}]^+$  calcd for  $\text{C}_{59}\text{H}_{78}\text{N}_{13}\text{O}_{12}\text{S}_4$ , 1288.4770; found, 1288.4768.  $[\alpha]_{\text{D}}^{20} +19.0$  ( $c$  1.0,  $\text{CH}_2\text{Cl}_2$ ).

Synthesis of the dimeric lactam **15c**:

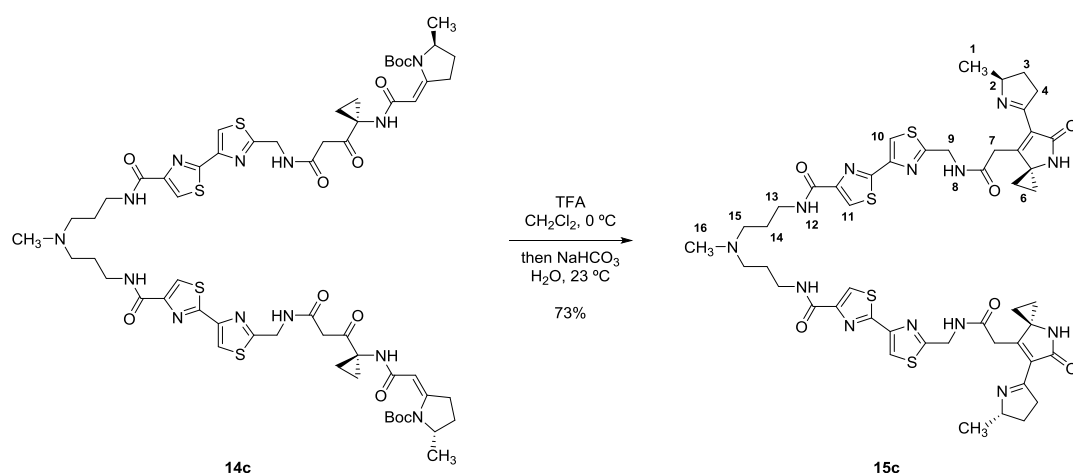

Trifluoroacetic acid (57.0  $\mu\text{L}$ , 745  $\mu\text{mol}$ , 120 equiv) was added dropwise via syringe to a solution of the amide **14c** (8.0 mg, 6.21  $\mu\text{mol}$ , 1 equiv) in dichloromethane (200  $\mu\text{L}$ ) at 0  $^\circ\text{C}$ . The reaction mixture was stirred for 14 h at 0  $^\circ\text{C}$ . The reaction mixture was concentrated. The concentrated reaction mixture was diluted with saturated aqueous sodium bicarbonate solution (650  $\mu\text{L}$ ). The diluted reaction mixture was stirred for 1 h at 23  $^\circ\text{C}$ . The product mixture was diluted sequentially with water (1.0 mL) and ethyl acetate (3.0 mL). The diluted product mixture was transferred to a separatory funnel and the layers that formed were separated. The aqueous layer was extracted with ethyl acetate (5  $\times$  3.0 mL). The organic layers were combined and the combined organic layers were dried over sodium sulfate. The dried solution was filtered and the filtrate was concentrated to provide the dimeric lactam **15c** as a light yellow solid (4.8 mg, 73%). The product so obtained was used without further purification.

$^1\text{H}$  NMR (500 MHz,  $\text{DMSO-}d_6$ )  $\delta$  10.28 (t,  $J$  = 5.9 Hz, 2H, H<sub>8</sub>), 8.61 (bs, 2H, H<sub>5</sub>), 8.55 (t,  $J$  = 5.9 Hz, 2H, H<sub>12</sub>), 8.22 (s, 2H, H<sub>11</sub>), 8.15 (s, 2H, H<sub>10</sub>), 4.60 (d,  $J$  = 6.0 Hz, 4H, H<sub>9</sub>), 4.16 – 4.07 (m, 2H, H<sub>2</sub>), 3.38 – 3.29 (m, 8H, H<sub>7</sub>, H<sub>13</sub>), 3.16 – 3.05 (m, 2H, H<sub>4</sub>), 2.86 (dt,  $J$  = 18.1, 9.1 Hz, 2H, H<sub>4</sub>), 2.39 (t,  $J$  = 6.8 Hz, 4H, H<sub>15</sub>), 2.19 (s, 3H, H<sub>16</sub>), 2.10 – 2.04 (m, 2H, H<sub>3</sub>), 1.77 – 1.65 (m, 8H, H<sub>6</sub>, H<sub>14</sub>), 1.38 – 1.34 (m, 6H, H<sub>3</sub>, H<sub>6</sub>), 1.17 (d,  $J$  = 7.0 Hz, 6H, H<sub>1</sub>).  $^{13}\text{C}$  NMR (126 MHz,  $\text{DMSO-}d_6$ )  $\delta$  171.0 (C), 169.6 (C), 168.4 (C), 168.2 (C), 161.7 (C), 160.2 (C), 157.7 (C), 151.0 (C), 147.4 (C), 127.4 (C), 123.9 (CH), 117.8 (CH), 66.5 (CH), 55.4 (CH<sub>2</sub>), 45.3 (C), 41.8 (CH<sub>3</sub>), 40.4 (CH<sub>2</sub>), 37.7 (CH<sub>2</sub>), 36.5 (CH<sub>2</sub>), 33.5 (CH<sub>2</sub>), 29.7 (CH<sub>2</sub>), 26.7 (CH<sub>2</sub>), 21.9 (CH<sub>3</sub>), 11.8 (CH<sub>2</sub>), 11.8 (CH<sub>2</sub>). HRMS-CI ( $m/z$ ):  $[\text{M} + \text{H}]^+$  calcd for  $\text{C}_{49}\text{H}_{58}\text{N}_{13}\text{O}_6\text{S}_4$ , 1052.3510; found, 1052.3514.  $[\alpha]_{\text{D}}^{20}$  +1.3 ( $c$  1.5,  $\text{DMSO-}d_6$ ).

### Synthesis of the $\beta$ -ketothioester **S6**:

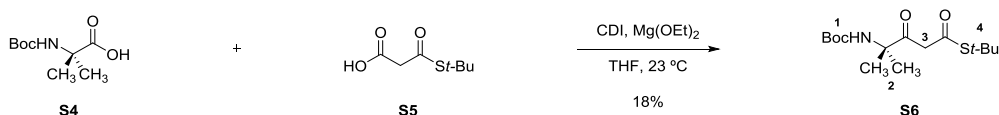

1,1'-Carbonyldiimidazole (1.20 g, 7.38 mmol, 1.50 equiv) was added to a solution of 2-((*tert*-butoxycarbonyl)amino)-2-methylpropanoic acid (**S4**, 1.00 g, 4.92 mmol, 1 equiv) in tetrahydrofuran (25 mL) at 23 °C. The resulting mixture was stirred for 6 h at 23 °C. In a second round-bottomed flask, magnesium ethoxide (845 mg, 7.38 mmol, 1.50 equiv) was added to a solution of 3-(*tert*-butylthio)-3-oxopropanoic acid (**S5**, 2.60 g, 14.8 mmol, 3.00 equiv) in tetrahydrofuran (13 mL) at 23 °C. The resulting mixture was stirred for 6 h at 23 °C, and then was concentrated to dryness. The activated carboxylic acid prepared in the first flask was transferred via cannula to the dried magnesium salt prepared in the second flask. The resulting mixture was stirred for 14 h at 23 °C. The product mixture was diluted sequentially with saturated aqueous ammonium chloride solution (20 mL) and ethyl acetate (30 mL). The diluted product mixture was transferred to a separatory funnel and the layers that formed were separated. The aqueous layer was extracted with ethyl acetate (2 × 30 mL). The organic layers were combined and the combined organic layers were washed with saturated aqueous sodium chloride solution (30 mL). The washed organic layer was dried over sodium sulfate. The dried solution was filtered and the filtrate was concentrated. The residue obtained was purified by flash-column chromatography (eluting with 75% dichloromethane–hexanes initially, grading to dichloromethane, linear gradient) to provide the  $\beta$ -ketothioester **S6** as a white solid (275 mg, 18%).

<sup>1</sup>H NMR (500 MHz, CD<sub>2</sub>Cl<sub>2</sub>)  $\delta$  5.04 (bs, 1H), 3.72 (s, 2H, H<sub>3</sub>), 1.46 (s, 9H, H<sub>4</sub>), 1.42 (s, 9H, H<sub>1</sub>), 1.34 (s, 6H, H<sub>2</sub>). <sup>13</sup>C NMR (126 MHz, CD<sub>2</sub>Cl<sub>2</sub>)  $\delta$  203.7 (C), 193.7 (C), 155.2 (C), 80.7 (C), 61.6 (C), 51.7 (CH<sub>2</sub>), 49.1 (C), 29.9 (CH<sub>3</sub>), 28.6 (CH<sub>3</sub>), 24.2 (CH<sub>3</sub>). IR (ATR-FTIR), cm<sup>-1</sup>: 3348 (m), 2974 (m), 2942 (w), 1723 (s), 1697 (s), 1668 (s), 1522 (s), 1452 (m), 1366 (m), 1273 (s), 1166 (s), 1080 (s), 1022 (m), 995 (s), 686 (s). HRMS-CI (m/z): [M + Na]<sup>+</sup> calcd for C<sub>15</sub>H<sub>27</sub>NNaO<sub>4</sub>S, 340.1553; found, 340.1553.

### Synthesis of the $\beta$ -ketoamide **S8**:

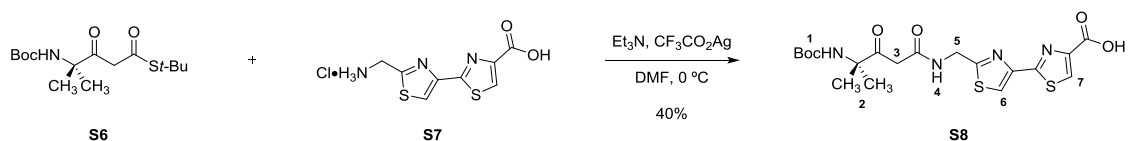

A solution of the thioester **S6** (821 mg, 2.59 mmol, 1.30 equiv) in *N,N*-dimethylformamide (5.4 mL) was added dropwise via syringe over 20 min to a solution of silver trifluoroacetate (879 mg, 3.98 mmol, 2.00 equiv), triethylamine (1.11 mL, 7.96 mmol, 4.00 equiv), and the amine **S7** (480 mg, 1.99 mmol, 1 equiv) in *N,N*-dimethylformamide (21 mL) at  $0^\circ\text{C}$ . The reaction mixture was stirred for 1 h at  $0^\circ\text{C}$ . The product mixture was filtered through a fritted funnel and the filtrate was concentrated. The concentrated product mixture was applied to a column containing trimethylamine acetate-functionalized silica gel (Si-TMA acetate; eluting with 2% acetic acid–methanol). The fractions containing product were collected, combined, and concentrated. The residue obtained was triturated with dichloromethane (50 mL) to provide the  $\beta$ -ketoamide **S8** as a white solid (368 mg, 40%).

$^1\text{H}$  NMR (500 MHz,  $\text{DMSO-}d_6$ )  $\delta$  13.01 (bs, 1H), 8.94 – 8.86 (m, 1H,  $\text{H}_4$ ), 8.47 (s, 1H,  $\text{H}_7$ ), 8.25 (s, 1H,  $\text{H}_6$ ), 7.49 (bs, 1H), 4.60 (d,  $J = 5.9$  Hz, 2H,  $\text{H}_5$ ), 3.49 (s, 2H,  $\text{H}_3$ ), 1.39 (s, 9H,  $\text{H}_1$ ), 1.23 (s, 6H,  $\text{H}_2$ ).  $^{13}\text{C}$  NMR (126 MHz,  $\text{DMSO-}d_6$ )  $\delta$  205.4 (C), 171.3 (C), 167.2 (C), 162.1 (C), 162.0 (C), 155.0 (C), 148.2 (C), 147.1 (C), 128.9 (CH), 118.3 (CH), 78.6 (C), 60.2 (C), 43.0 ( $\text{CH}_2$ ), 40.5 ( $\text{CH}_2$ ), 28.2 ( $\text{CH}_3$ ), 23.2 ( $\text{CH}_3$ ). IR (ATR-FTIR),  $\text{cm}^{-1}$ : 3308 (br m), 2962 (w), 2933 (w), 1713 (m), 1670 (s), 1650 (s), 1516 (s), 1293 (s), 1163 (s), 1053 (m), 754 (m). HRMS-Cl ( $m/z$ ):  $[\text{M} + \text{H}]^+$  calcd for  $\text{C}_{19}\text{H}_{25}\text{N}_4\text{O}_6\text{S}_2$ , 469.1210; found, 469.1212.

Synthesis of the hydrochloride salt **S9**:

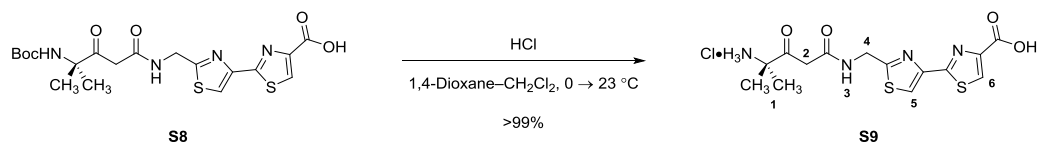

A solution of hydrogen chloride in 1,4-dioxane (4.0 N, 3.74 mL, 14.5 mmol, 70.2 equiv) was added dropwise via syringe to a solution of the  $\beta$ -ketoamide **S8** (100 mg, 213  $\mu$ mol, 1 equiv) in dichloromethane (4.0 mL) at 0 °C. The reaction mixture was allowed to warm to 23 °C and stirred at this temperature for 1 h. The product mixture was concentrated to provide the hydrochloride salt **S9** as a white solid (86.4 mg, >99%). The product **S9** obtained in this way was used directly in the following step.

<sup>1</sup>H NMR (400 MHz, DMSO-*d*<sub>6</sub>)  $\delta$  9.22 (t, *J* = 6.1 Hz, 1H, H<sub>3</sub>), 8.49 (s, 1H, H<sub>6</sub>), 8.41 (bs, 3H), 8.29 (s, 1H, H<sub>5</sub>), 4.65 (d, *J* = 5.8 Hz, 2H, H<sub>4</sub>), 3.77 (s, 2H, H<sub>2</sub>), 1.49 (s, 6H, H<sub>1</sub>). <sup>13</sup>C NMR (126 MHz, DMSO-*d*<sub>6</sub>)  $\delta$  202.7 (C), 170.7 (C), 165.9 (C), 162.0 (C), 162.0 (C), 148.1 (C), 147.1 (C), 128.9 (CH), 118.4 (CH), 61.5 (C), 43.7 (CH<sub>2</sub>), 40.5 (CH<sub>2</sub>), 21.9 (CH<sub>3</sub>).

### Synthesis of the acid **S10**:

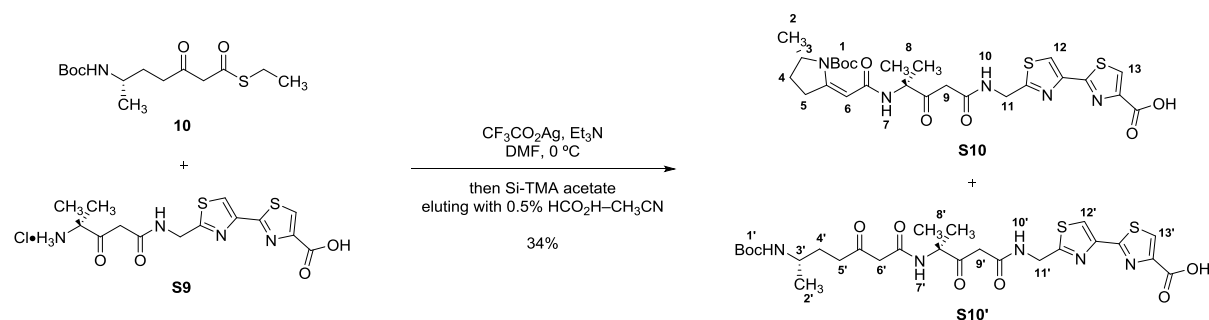

Silver trifluoroacetate (164 mg, 742  $\mu\text{mol}$ , 2.00 equiv) was added to a solution of triethylamine (207  $\mu\text{L}$ , 1.48 mmol, 4.00 equiv) and the amine **S9** (149 mg, 371  $\mu\text{mol}$ , 1 equiv) in *N,N*-dimethylformamide (2.7 mL) at  $0^\circ\text{C}$ . A solution of the  $\beta$ -keto thioester **10** (146 mg, 482  $\mu\text{mol}$ , 1.30 equiv) in *N,N*-dimethylformamide (1.2 mL) was added dropwise via syringe to the reaction mixture. The reaction vessel was covered with foil to exclude light and the reaction mixture was stirred for 1 h at  $0^\circ\text{C}$ . The heterogeneous product mixture was filtered through a fritted funnel and the filtrate was concentrated. The residue obtained was applied to a column containing trimethylamine acetate-functionalized silica gel (Si-TMA acetate; eluting with 0.5% formic acid–acetonitrile). The fractions containing product were collected, combined, and concentrated to provide a 2.3:1 mixture of the acids **S10** and **S10'** as a white solid (146 mg, 34%). The product mixture so obtained was used without further purification.

$^1\text{H}$  NMR (**S10**, 400 MHz,  $\text{DMSO}-d_6$ )  $\delta$  8.81 (t,  $J = 6.0$  Hz, 1H,  $\text{H}_{10}$ ), 8.47 (s, 1H,  $\text{H}_{13}$ ), 8.29 (bs, 1H,  $\text{H}_7$ ), 8.25 (s, 1H,  $\text{H}_{12}$ ), 6.59 (s, 1H,  $\text{H}_6$ ), 4.60 (d,  $J = 5.9$  Hz, 2H,  $\text{H}_{11}$ ), 4.15 (app p,  $J = 6.5$  Hz, 1H,  $\text{H}_3$ ), 3.43 (s, 2H,  $\text{H}_9$ ), 3.40 – 3.26 (m, 1H,  $\text{H}_5$ ), 2.75 (dt,  $J = 18.9, 10.0$  Hz, 1H,  $\text{H}_5$ ), 1.95 – 1.77 (m, 1H,  $\text{H}_4$ ), 1.56 – 1.47 (m, 1H,  $\text{H}_4$ ), 1.47 (s, 9H,  $\text{H}_1$ ), 1.23 (s, 6H,  $\text{H}_8$ ), 1.13 (d,  $J = 6.4$  Hz, 3H,  $\text{H}_2$ ).  $^1\text{H}$  NMR (**S10'**, 400 MHz,  $\text{DMSO}-d_6$ )  $\delta$  8.87 (t,  $J = 6.1$  Hz, 1H,  $\text{H}_{10'}$ ), 8.61 (bs, 1H,  $\text{H}_{7'}$ ), 8.47 (s, 1H,  $\text{H}_{13'}$ ), 8.25 (s, 1H,  $\text{H}_{12'}$ ), 6.71 – 6.64 (m, 1H), 4.60 (d,  $J = 5.9$  Hz, 2H,  $\text{H}_{11'}$ ), 3.51 (s, 2H,  $\text{H}_{9'}$ ), 3.39 – 3.27 (m, 3H,  $\text{H}_{3'}$ ,  $\text{H}_{6'}$ ), 2.54 – 2.44 (m, 2H,  $\text{H}_{5'}$ ), 1.56 – 1.45 (m, 2H,  $\text{H}_4$ ), 1.37 (s, 9H,  $\text{H}_1$ ), 1.27 (s, 6H,  $\text{H}_8$ ), 0.98 (d,  $J = 6.5$  Hz, 3H,  $\text{H}_2$ ).  $^{13}\text{C}$  NMR (**S10**, 101 MHz,  $\text{DMSO}-d_6$ )  $\delta$  204.9 (C), 171.4 (C), 167.6 (C), 167.5 (C), 163.1 (C), 162.0 (C), 153.3 (C), 151.2 (C), 148.1 (C), 147.1 (C), 128.9 (CH), 118.3 (CH), 98.2 (CH), 80.8 (C), 59.9 (C), 56.0 (CH), 43.0 ( $\text{CH}_2$ ), 40.6 ( $\text{CH}_2$ ), 28.8 ( $\text{CH}_2$ ), 27.8 ( $\text{CH}_2$ ), 27.8 ( $\text{CH}_3$ ), 23.4 ( $\text{CH}_3$ ), 23.3 ( $\text{CH}_3$ ), 19.3 ( $\text{CH}_3$ ).  $^{13}\text{C}$  NMR (**S10'**, 101 MHz,  $\text{DMSO}-d_6$ )  $\delta$  204.7 (C), 204.6 (C), 171.4 (C), 167.3 (C), 166.5 (C), 163.1 (C), 162.0 (C), 155.1 (C), 148.1 (C), 147.1 (C), 128.9 (CH), 118.3 (CH), 77.4 (C), 60.4 (C), 50.0 ( $\text{CH}_2$ ), 45.2 (CH), 43.4 ( $\text{CH}_2$ ), 40.6 ( $\text{CH}_2$ ), 38.8 ( $\text{CH}_2$ ), 29.9 ( $\text{CH}_2$ ), 28.3 ( $\text{CH}_3$ ), 23.4 ( $\text{CH}_3$ ), 23.3 ( $\text{CH}_3$ ), 20.9 ( $\text{CH}_3$ ). IR (ATR-FTIR),  $\text{cm}^{-1}$ : 3297 (br w), 2976 (w), 2933 (w), 1711 (s), 1648 (s), 1244 (m), 1158 (s), 754 (m), 635 (w). HRMS-CI ( $m/z$ ):  $[\text{M} + \text{H}]^+$  calcd for  $\text{C}_{26}\text{H}_{34}\text{N}_5\text{O}_7\text{S}_2$ , 592.1894; found, 592.1891.  $[\alpha]_{\text{D}}^{20} +15.0$  ( $c$  1.0,  $\text{CH}_3\text{OH}$ ).

### Synthesis of the amide **14d**:

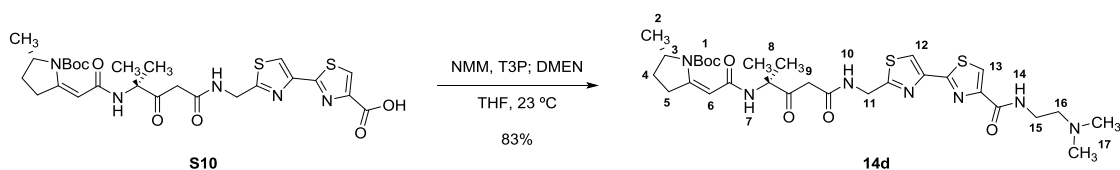

A solution of T3P in ethyl acetate (50 wt%, 154  $\mu\text{L}$ , 259  $\mu\text{mol}$ , 1.50 equiv) and 4-methylmorpholine (94.9  $\mu\text{L}$ , 863  $\mu\text{mol}$ , 5.00 equiv) were added in sequence to a solution of the acid **S10** (102.1 mg, 173  $\mu\text{mol}$ , 1 equiv) in tetrahydrofuran (1.2 mL) at 23  $^{\circ}\text{C}$ . The reaction mixture was stirred for 20 min at 23  $^{\circ}\text{C}$ . *N,N*-Dimethylethylenediamine (47.1  $\mu\text{L}$ , 431  $\mu\text{mol}$ , 2.50 equiv) was added to the reaction mixture. The resulting mixture was stirred for 7 h at 23  $^{\circ}\text{C}$ . The product mixture was concentrated. The concentrated product mixture was diluted with ethyl acetate (10 mL). The diluted product mixture was poured into a separatory funnel that had been charged with saturated aqueous sodium bicarbonate solution (5.0 mL) and the layers that formed were separated. The aqueous layer was extracted with ethyl acetate (2  $\times$  10 mL). The organic layers were combined and the combined organic layers were dried over sodium sulfate. The dried solution was filtered and the filtrate was concentrated. The residue obtained was purified by flash-column chromatography (eluting with 15% methanol–dichloromethane initially, grading to 40% methanol–dichloromethane, linear gradient) to provide the amide **14d** as a white solid (94.7 mg, 83%).

$^1\text{H}$  NMR (500 MHz,  $\text{CD}_2\text{Cl}_2$ )  $\delta$  8.05 (bs, 2H, H<sub>12</sub>, H<sub>13</sub>), 7.92 – 7.85 (m, 2H, H<sub>10</sub>, H<sub>14</sub>), 6.55 (s, 1H, H<sub>6</sub>), 5.97 (bs, 1H, H<sub>7</sub>), 4.75 (d,  $J$  = 6.0 Hz, 2H, H<sub>11</sub>), 4.20 (app p,  $J$  = 6.7 Hz, 1H, H<sub>3</sub>), 3.67 – 3.60 (m, 2H, H<sub>15</sub>), 3.54 (s, 2H, H<sub>9</sub>), 3.37 (dd,  $J$  = 18.3, 9.0 Hz, 1H, H<sub>5</sub>), 2.86 – 2.71 (m, 3H, H<sub>5</sub>, H<sub>16</sub>), 2.50 (s, 6H, H<sub>17</sub>), 1.86 (ddd,  $J$  = 20.7, 12.1, 8.6 Hz, 1H, H<sub>4</sub>), 1.50 (s, 10H, H<sub>1</sub>, H<sub>4</sub>), 1.34 (s, 6H, H<sub>8</sub>), 1.14 (d,  $J$  = 6.4 Hz, 3H, H<sub>2</sub>).  $^{13}\text{C}$  NMR (126 MHz,  $\text{CD}_2\text{Cl}_2$ )  $\delta$  206.1 (C), 170.7 (C), 169.3 (C), 168.0 (C), 163.2 (C), 161.7 (C), 156.9 (C), 152.4 (C), 151.4 (C), 148.8 (C), 123.9 (CH), 118.1 (CH), 96.9 (CH), 82.2 (C), 61.2 (C), 58.7 (CH<sub>2</sub>), 57.4 (CH), 45.2 (CH<sub>3</sub>), 43.3 (CH<sub>2</sub>), 41.7 (CH<sub>2</sub>), 36.7 (CH<sub>2</sub>), 30.1 (CH<sub>2</sub>), 28.8 (CH<sub>2</sub>), 28.5 (CH<sub>3</sub>), 24.3 (CH<sub>3</sub>), 24.3 (CH<sub>3</sub>), 19.8 (CH<sub>3</sub>). IR (ATR-FTIR),  $\text{cm}^{-1}$ : 3306 (br w), 2974 (w), 2934 (w), 1712 (m), 1654 (s), 1601 (w), 1540 (m), 1245 (m), 1156 (s), 620 (w). HRMS-Cl (m/z):  $[\text{M} + \text{H}]^+$  calcd for  $\text{C}_{30}\text{H}_{44}\text{N}_7\text{O}_6\text{S}_2$ , 662.2789; found, 662.2787.  $[\alpha]_{\text{D}}^{20}$   $-3.0$  ( $c$  1.0,  $\text{CH}_2\text{Cl}_2$ ).



Synthesis of the lactam **15d**:

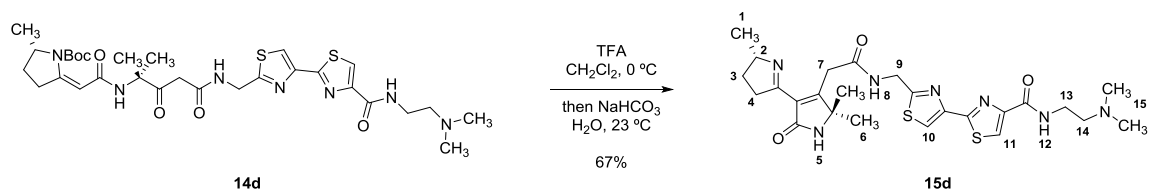

Trifluoroacetic acid (31.9  $\mu$ L, 417  $\mu$ mol, 120 equiv) was added dropwise via syringe to a solution of the amide **14d** (2.3 mg, 3.48  $\mu$ mol, 1 equiv) in dichloromethane (200  $\mu$ L) at 0 °C. The reaction mixture was stirred for 14 h at 0 °C. The reaction mixture was concentrated. The concentrated reaction mixture was diluted with saturated aqueous sodium bicarbonate solution (200  $\mu$ L). The diluted reaction mixture was stirred for 1 h at 23 °C. The product mixture was diluted sequentially with water (1.0 mL) and ethyl acetate (3.0 mL). The diluted product mixture was transferred to a separatory funnel and the layers that formed were separated. The aqueous layer was extracted with ethyl acetate (5  $\times$  3.0 mL). The organic layers were combined and the combined organic layers were dried over sodium sulfate. The dried solution was filtered and the filtrate was concentrated. To induce complete cyclization, the residue obtained was diluted with dichloromethane (1.0 mL) and left to stand for 3 h at 23 °C. The diluted product mixture was concentrated to provide the lactam **15d** as an off-white solid (1.3 mg, 67%).

<sup>1</sup>H NMR (500 MHz, CD<sub>2</sub>Cl<sub>2</sub>)  $\delta$  10.84 (t,  $J$  = 6.0 Hz, 1H, H<sub>8</sub>), 8.05 (s, 1H, H<sub>11</sub>), 7.92 (s, 1H, H<sub>10</sub>), 7.66 (bs, 1H, H<sub>12</sub>), 6.23 (bs, 1H, H<sub>5</sub>), 4.71 – 4.65 (m, 2H, H<sub>9</sub>), 4.23 – 4.15 (m, 1H, H<sub>2</sub>), 3.59 – 3.45 (m, 4H, H<sub>7</sub>, H<sub>13</sub>), 3.21 – 3.11 (m, 1H, H<sub>4</sub>), 3.03 – 2.90 (m, 1H, H<sub>4</sub>), 2.54 – 2.47 (m, 2H, H<sub>14</sub>), 2.27 (s, 6H, H<sub>15</sub>), 2.21 – 2.13 (m, 1H, H<sub>3</sub>), 1.44 – 1.40 (m, 7H, H<sub>3</sub>, H<sub>6</sub>), 1.25 (d,  $J$  = 6.8 Hz, 3H, H<sub>1</sub>). <sup>13</sup>C NMR (126 MHz, CD<sub>2</sub>Cl<sub>2</sub>)  $\delta$  171.2 (C), 169.8 (C), 169.8 (C), 169.2 (C), 163.6 (C), 163.0 (C), 161.3 (C), 151.7 (C), 149.0 (C), 127.9 (C), 123.7 (CH), 117.4 (CH), 67.9 (CH), 62.1 (C), 58.8 (CH<sub>2</sub>), 45.7 (CH<sub>3</sub>), 41.4 (CH<sub>2</sub>), 37.5 (CH<sub>2</sub>), 37.5 (CH<sub>2</sub>), 36.5 (CH<sub>2</sub>), 30.8 (CH<sub>2</sub>), 25.5 (CH<sub>3</sub>), 25.5 (CH<sub>3</sub>), 22.4 (CH<sub>3</sub>). IR (ATR-FTIR), cm<sup>-1</sup>: 3277 (br w), 2961 (w), 1655 (s), 1604 (w), 1543 (s), 1187 (m), 619 (m). HRMS-CI (m/z): [M + H]<sup>+</sup> calcd for C<sub>25</sub>H<sub>34</sub>N<sub>7</sub>O<sub>3</sub>S<sub>2</sub>, 544.2159; found, 544.2164. [ $\alpha$ ]<sub>D</sub><sup>20</sup> –15.0 ( $c$  1.0, CH<sub>2</sub>Cl<sub>2</sub>).

Synthesis of the thioether **18**:

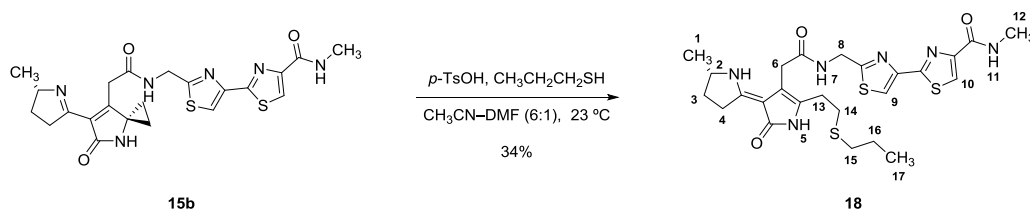

Propanethiol (100  $\mu\text{L}$ ) and *p*-toluenesulfonic acid monohydrate (2.0 mg, 10.3  $\mu\text{mol}$ , 1.00 equiv) were added in sequence to a solution of the amide **15b** (5.0 mg, 10.3  $\mu\text{mol}$ , 1 equiv) in acetonitrile (300  $\mu\text{L}$ ) at 23  $^\circ\text{C}$ . The reaction mixture was stirred for 30 min at 23  $^\circ\text{C}$ . *N,N*-Dimethylformamide (50  $\mu\text{L}$ ) was added to the reaction mixture at 23  $^\circ\text{C}$ . The reaction mixture was stirred for 3 h at 23  $^\circ\text{C}$ . The product mixture was diluted sequentially with toluene (5.0 mL) and hexanes (3.0 mL). The diluted product mixture was filtered and the filtrate was concentrated. The residue obtained was dried by azeotropic distillation with toluene (10 mL) to provide the thioether **18** as a light yellow solid (1.7 mg, 34%).

$^1\text{H}$  NMR (500 MHz,  $\text{DMSO-}d_6$ )  $\delta$  9.34 – 9.26 (m, 1H, H<sub>7</sub>), 8.41 – 8.36 (m, 2H, H<sub>5</sub>, H<sub>11</sub>), 8.25 (s, 1H, H<sub>10</sub>), 8.18 (s, 1H, H<sub>9</sub>), 4.60 – 4.55 (m, 2H, H<sub>8</sub>), 3.93 – 3.85 (m, 1H, H<sub>2</sub>), 3.32 (d,  $J$  = 17.0 Hz, 1H, H<sub>6</sub>), 3.28 (d,  $J$  = 16.8 Hz, 1H, H<sub>6</sub>), 3.02 – 2.92 (m, 1H, H<sub>4</sub>), 2.91 – 2.84 (m, 1H, H<sub>4</sub>), 2.82 (bs, 3H, H<sub>12</sub>), 2.62 – 2.54 (m, 4H, H<sub>13</sub>, H<sub>14</sub>), 2.49 – 2.42 (m, 2H, H<sub>15</sub>), 2.14 – 2.07 (m, 1H, H<sub>3</sub>), 1.55 – 1.41 (m, 3H, H<sub>3</sub>, H<sub>16</sub>), 1.17 (d,  $J$  = 6.8 Hz, 3H, H<sub>1</sub>), 0.90 (t,  $J$  = 7.2 Hz, 3H, H<sub>17</sub>).  $^1\text{H}$  NMR (400 MHz,  $\text{CD}_3\text{OD}$ )  $\delta$  8.19 – 8.14 (m, 2H, H<sub>9</sub>, H<sub>10</sub>), 4.71 (d,  $J$  = 5.2 Hz, 2H, H<sub>8</sub>), 4.12 – 3.99 (m, 1H, H<sub>2</sub>), 3.49 (s, 2H, H<sub>6</sub>), 3.04 – 2.89 (m, 5H, H<sub>4</sub>, H<sub>12</sub>), 2.77 – 2.65 (m, 4H, H<sub>13</sub>, H<sub>14</sub>), 2.44 (t,  $J$  = 7.2 Hz, 2H, H<sub>15</sub>), 2.32 – 2.19 (m, 1H, H<sub>3</sub>), 1.67 – 1.56 (m, 1H, H<sub>3</sub>), 1.54 (app q,  $J$  = 7.3 Hz, 2H, H<sub>16</sub>), 1.34 – 1.24 (m, 3H, H<sub>1</sub>), 0.93 (t,  $J$  = 7.3 Hz, 3H, H<sub>17</sub>).  $^{13}\text{C}$  NMR (126 MHz,  $\text{DMSO-}d_6$ )  $\delta$  171.8 (C), 171.3 (C), 161.7 (C), 160.9 (C), 160.8 (C), 150.9 (C), 147.2 (C), 125.8 (C), 123.7 (CH), 117.9 (CH), 104.3 (C), 96.1 (C), 54.6 (CH), 40.6 (CH<sub>2</sub>), 33.1 (CH<sub>2</sub>), 32.0 (CH<sub>2</sub>), 30.4 (CH<sub>2</sub>), 30.2 (CH<sub>2</sub>), 29.2 (CH<sub>2</sub>), 25.8 (CH<sub>3</sub>), 25.7 (CH<sub>2</sub>), 22.5 (CH<sub>2</sub>), 21.3 (CH<sub>3</sub>), 13.3 (CH<sub>3</sub>). HRMS-Cl ( $m/z$ ):  $[\text{M} + \text{H}]^+$  calcd for  $\text{C}_{25}\text{H}_{33}\text{N}_6\text{O}_3\text{S}_3$ , 561.1771; found, 561.1776.  $[\alpha]_{\text{D}}^{20}$  +60.5 ( $c$  0.22,  $\text{DMSO-}d_6$ ).

### Synthesis of the amide **14e**:

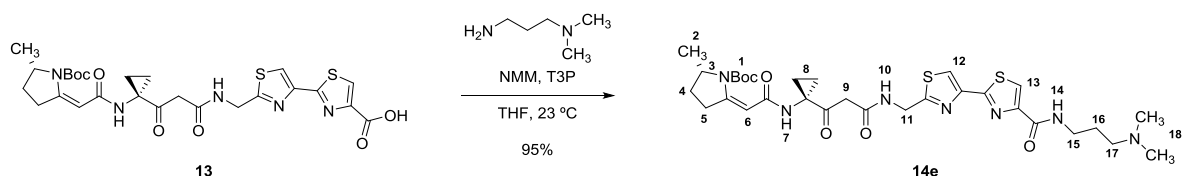

A solution of T3P in ethyl acetate (50 wt%, 30.3  $\mu\text{L}$ , 50.9  $\mu\text{mol}$ , 1.50 equiv) and 4-methylmorpholine (18.6  $\mu\text{L}$ , 170  $\mu\text{mol}$ , 5.00 equiv) were added in sequence to a solution of the acid **13** (20.0 mg, 33.9  $\mu\text{mol}$ , 1 equiv) in tetrahydrofuran (680  $\mu\text{L}$ ) at 23 °C. The reaction mixture was stirred for 20 min at 23 °C. *N,N*-Dimethyl-1,3-diaminopropane (10.7  $\mu\text{L}$ , 84.8  $\mu\text{mol}$ , 2.50 equiv) was then added to the reaction mixture. The resulting mixture was stirred for 7 h at 23 °C. The product mixture was concentrated. The concentrated product mixture was diluted with ethyl acetate (10 mL). The diluted product mixture was poured into a separatory funnel that had been charged with saturated aqueous sodium bicarbonate solution (5.0 mL) and the layers that formed were separated. The aqueous layer was extracted with ethyl acetate (2  $\times$  10 mL). The organic layers were combined and the combined organic layers were dried over sodium sulfate. The dried solution was filtered and the filtrate was concentrated to provide the amide **14e** as a white solid (21.8 mg, 95%). The product so obtained was used without further purification.

$^1\text{H}$  NMR (500 MHz,  $\text{CD}_2\text{Cl}_2$ )  $\delta$  8.33 – 8.22 (m, 1H,  $\text{H}_{14}$ ), 8.11 – 8.05 (m, 1H,  $\text{H}_{10}$ ), 8.03 (s, 1H,  $\text{H}_{13}$ ), 7.90 (s, 1H,  $\text{H}_{12}$ ), 6.55 (s, 1H,  $\text{H}_6$ ), 6.29 (bs, 1H,  $\text{H}_7$ ), 4.76 (d,  $J = 5.9$  Hz, 2H,  $\text{H}_{11}$ ), 4.30 – 4.16 (m, 1H,  $\text{H}_3$ ), 3.66 (s, 2H,  $\text{H}_9$ ), 3.53 – 3.45 (m, 2H,  $\text{H}_{15}$ ), 3.48 – 3.42 (m, 1H,  $\text{H}_5$ ), 2.99 – 2.80 (m, 1H,  $\text{H}_5$ ), 2.41 (t,  $J = 6.5$  Hz, 2H,  $\text{H}_{17}$ ), 2.25 (s, 6H,  $\text{H}_{18}$ ), 1.92 (tt,  $J = 11.9, 8.5$  Hz, 1H,  $\text{H}_4$ ), 1.83 – 1.70 (m, 2H,  $\text{H}_{16}$ ), 1.62 (app q,  $J = 4.4$  Hz, 2H,  $\text{H}_8$ ), 1.56 (dd,  $J = 12.4, 8.4$  Hz, 1H,  $\text{H}_4$ ), 1.49 (s, 9H,  $\text{H}_1$ ), 1.17 (d,  $J = 6.4$  Hz, 3H,  $\text{H}_2$ ), 1.18 – 1.12 (m, 2H,  $\text{H}_8$ ).  $^{13}\text{C}$  NMR (126 MHz,  $\text{CD}_2\text{Cl}_2$ )  $\delta$  206.1 (C), 170.6 (C), 170.4 (C), 167.2 (C), 162.8 (C), 161.3 (C), 156.8 (C), 152.4 (C), 152.1 (C), 149.0 (C), 123.4 (CH), 117.3 (CH), 97.3 (CH), 82.2 (C), 58.7 (CH<sub>2</sub>), 57.4 (CH), 45.8 (CH<sub>3</sub>), 45.6 (CH<sub>2</sub>), 42.0 (C), 41.7 (CH<sub>2</sub>), 39.2 (CH<sub>2</sub>), 30.2 (CH<sub>2</sub>), 28.5 (CH<sub>3</sub>), 28.5 (CH<sub>2</sub>), 27.3 (CH<sub>2</sub>), 21.6 (CH<sub>2</sub>), 21.6 (CH<sub>2</sub>), 19.8 (CH<sub>3</sub>). IR (ATR-FTIR),  $\text{cm}^{-1}$ : 3282 (w), 2976 (w), 1709 (m), 1650 (s), 1606 (w), 1542 (m), 1290 (m), 1155 (s), 770 (w). HRMS-Cl ( $m/z$ ):  $[\text{M} + \text{H}]^+$  calcd for  $\text{C}_{31}\text{H}_{44}\text{N}_7\text{O}_6\text{S}_2$ , 674.2789; found, 674.2795.  $[\alpha]_{\text{D}}^{20} +33.0$  (c 1.0,  $\text{CH}_2\text{Cl}_2$ ).

Synthesis of the amide **14f**:

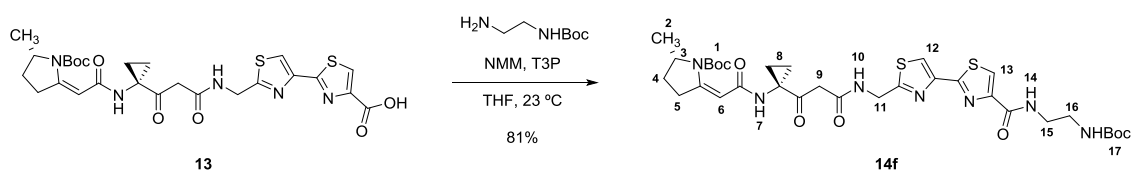

A solution of T3P in ethyl acetate (50 wt%, 22.7  $\mu$ L, 38.2  $\mu$ mol, 1.50 equiv) and 4-methylmorpholine (14.0  $\mu$ L, 127  $\mu$ mol, 5.00 equiv) were added in sequence to a solution of the acid **13** (15.0 mg, 25.4  $\mu$ mol, 1 equiv) in tetrahydrofuran (510  $\mu$ L) at 23 °C. The reaction mixture was stirred for 20 min at 23 °C. *tert*-Butyl-*N*-(2-aminoethyl)carbamate (9.1  $\mu$ L, 57.2  $\mu$ mol, 2.25 equiv) was added to the reaction mixture. The resulting mixture was stirred for 7 h at 23 °C. The product mixture was concentrated. The residue obtained was purified by flash-column chromatography (eluting with dichloromethane initially, grading to 10% methanol–dichloromethane, linear gradient) to provide the amide **14f** as an off-white solid (15.1 mg, 81%).

<sup>1</sup>H NMR (600 MHz, CD<sub>2</sub>Cl<sub>2</sub>)  $\delta$  8.10 – 8.04 (m, 2H, H<sub>10</sub>, H<sub>13</sub>), 7.96 (s, 1H, H<sub>12</sub>), 7.76 (bs, 1H, H<sub>14</sub>), 6.55 (s, 1H, H<sub>6</sub>), 6.24 (bs, 1H, H<sub>7</sub>), 5.08 (bs, 1H), 4.76 (d, *J* = 4.1 Hz, 2H, H<sub>11</sub>), 4.32 – 4.19 (m, 1H, H<sub>3</sub>), 3.67 (s, 2H, H<sub>9</sub>), 3.57 – 3.50 (m, 2H, H<sub>15</sub>), 3.48 (dd, *J* = 18.3, 8.8 Hz, 1H, H<sub>5</sub>), 3.38 – 3.33 (m, 2H, H<sub>16</sub>), 2.96 – 2.81 (m, 1H, H<sub>5</sub>), 2.03 – 1.85 (m, 1H, H<sub>4</sub>), 1.65 – 1.59 (m, 2H, H<sub>8</sub>), 1.61 – 1.52 (m, 1H, H<sub>4</sub>), 1.50 (s, 9H, H<sub>1</sub>), 1.40 (s, 9H, H<sub>17</sub>), 1.20 – 1.13 (m, 5H, H<sub>2</sub>, H<sub>8</sub>). <sup>13</sup>C NMR (126 MHz, CD<sub>2</sub>Cl<sub>2</sub>)  $\delta$  206.2 (C), 170.6 (C), 170.4 (C), 167.3 (C), 163.0 (C), 162.1 (C), 156.8 (C), 156.8 (C), 152.4 (C), 151.3 (C), 148.8 (C), 123.9 (CH), 117.8 (CH), 97.3 (CH), 82.2 (C), 79.7 (C), 57.4 (CH), 45.7 (CH<sub>2</sub>), 42.0 (C), 41.6 (CH<sub>2</sub>), 41.2 (CH<sub>2</sub>), 40.5 (CH<sub>2</sub>), 30.2 (CH<sub>2</sub>), 28.8 (CH<sub>2</sub>), 28.6 (CH<sub>3</sub>), 28.5 (CH<sub>3</sub>), 21.6 (CH<sub>2</sub>), 21.6 (CH<sub>2</sub>), 19.8 (CH<sub>3</sub>). IR (ATR-FTIR), cm<sup>-1</sup>: 3313 (br w), 2970 (w), 2930 (w), 1704 (m), 1650 (m), 1524 (w), 1154 (s), 1025 (w), 802 (m). HRMS-CI (*m/z*): [M + H]<sup>+</sup> calcd for C<sub>33</sub>H<sub>46</sub>N<sub>7</sub>O<sub>8</sub>S<sub>2</sub>, 732.2844; found, 732.2852. [ $\alpha$ ]<sub>D</sub><sup>20</sup> +4.0 (*c* 1.0, CH<sub>2</sub>Cl<sub>2</sub>).

### Synthesis of the amide **14g**:

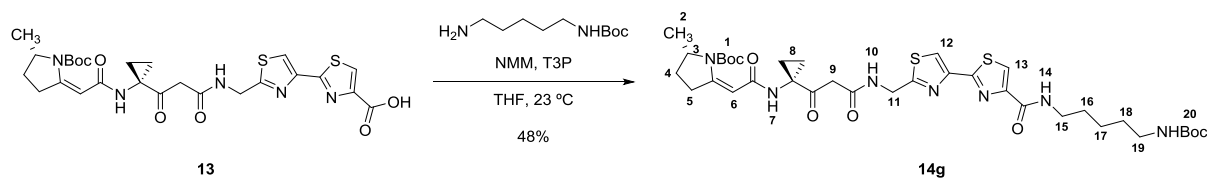

A solution of T3P in ethyl acetate (50 wt%, 30.3  $\mu\text{L}$ , 50.9  $\mu\text{mol}$ , 1.50 equiv) and 4-methylmorpholine (18.6  $\mu\text{L}$ , 170  $\mu\text{mol}$ , 5.00 equiv) were added in sequence to a solution of the acid **13** (20.0 mg, 33.9  $\mu\text{mol}$ , 1 equiv) in tetrahydrofuran (670  $\mu\text{L}$ ) at 23 °C. The reaction mixture was stirred for 20 min at 23 °C. *tert*-Butyl-*N*-(2-aminopentyl)carbamate (17.7  $\mu\text{L}$ , 84.8  $\mu\text{mol}$ , 2.50 equiv) was added to the reaction mixture. The resulting mixture was stirred for 7 h at 23 °C. The product mixture was concentrated. The residue obtained was purified by flash-column chromatography (eluting with dichloromethane initially, grading to 10% methanol–dichloromethane, linear gradient) to provide the amide **14g** as an off-white solid (12.6 mg, 48%).

$^1\text{H}$  NMR (500 MHz,  $\text{CD}_2\text{Cl}_2$ )  $\delta$  8.09 – 8.04 (m, 1H, H<sub>10</sub>), 8.05 (s, 1H, H<sub>13</sub>), 7.96 (s, 1H, H<sub>12</sub>), 7.42 (t,  $J = 6.2$  Hz, 1H, H<sub>14</sub>), 6.55 (s, 1H, H<sub>6</sub>), 6.27 (bs, 1H, H<sub>7</sub>), 4.76 (d,  $J = 6.0$  Hz, 2H, H<sub>11</sub>), 4.64 (bs, 1H), 4.23 (app p,  $J = 6.7$  Hz, 1H, H<sub>3</sub>), 3.66 (s, 2H, H<sub>9</sub>), 3.51 – 3.44 (m, 1H, H<sub>5</sub>), 3.43 (app q,  $J = 6.7$  Hz, 2H, H<sub>15</sub>), 3.13 – 3.05 (m, 2H, H<sub>19</sub>), 2.95 – 2.84 (m, 1H, H<sub>5</sub>), 1.92 (tt,  $J = 12.6, 8.6$  Hz, 1H, H<sub>4</sub>), 1.68 – 1.60 (m, 4H, H<sub>8</sub>, H<sub>16</sub>), 1.60 – 1.53 (m, 1H, H<sub>4</sub>), 1.54 – 1.50 (m, 2H, H<sub>18</sub>), 1.50 (s, 9H, H<sub>1</sub>), 1.43 – 1.37 (m, 11H, H<sub>17</sub>, H<sub>20</sub>), 1.18 (d,  $J = 6.5$  Hz, 3H, H<sub>2</sub>), 1.18 – 1.12 (m, 2H, H<sub>8</sub>).  $^{13}\text{C}$  NMR (126 MHz,  $\text{CD}_2\text{Cl}_2$ )  $\delta$  206.1 (C), 170.6 (C), 170.4 (C), 167.2 (C), 163.0 (C), 161.3 (C), 156.8 (C), 156.4 (C), 152.4 (C), 151.7 (C), 148.8 (C), 123.6 (CH), 117.7 (CH), 97.3 (CH), 82.2 (C), 79.2 (C), 57.4 (CH), 45.6 (CH<sub>2</sub>), 42.0 (C), 41.7 (CH<sub>2</sub>), 41.0 (CH<sub>2</sub>), 39.7 (CH<sub>2</sub>), 30.3 (CH<sub>2</sub>), 30.2 (CH<sub>2</sub>), 30.1 (CH<sub>2</sub>), 28.9 (CH<sub>2</sub>), 28.7 (CH<sub>3</sub>), 28.5 (CH<sub>3</sub>), 24.7 (CH<sub>2</sub>), 21.6 (CH<sub>2</sub>), 21.6 (CH<sub>2</sub>), 19.9 (CH<sub>3</sub>). IR (ATR-FTIR),  $\text{cm}^{-1}$ : 3305 (br m), 2970 (w), 2932 (w), 1699 (s), 1653 (s), 1541 (m), 1242 (m), 1156 (s), 1026 (m), 621 (w). HRMS-Cl (m/z):  $[\text{M} + \text{H}]^+$  calcd for  $\text{C}_{36}\text{H}_{52}\text{N}_7\text{O}_8\text{S}_2$ , 774.3313; found, 774.3309.  $[\alpha]_{\text{D}}^{20} +30.0$  (c 0.9,  $\text{CH}_2\text{Cl}_2$ ).

### Synthesis of the amide **14h**:

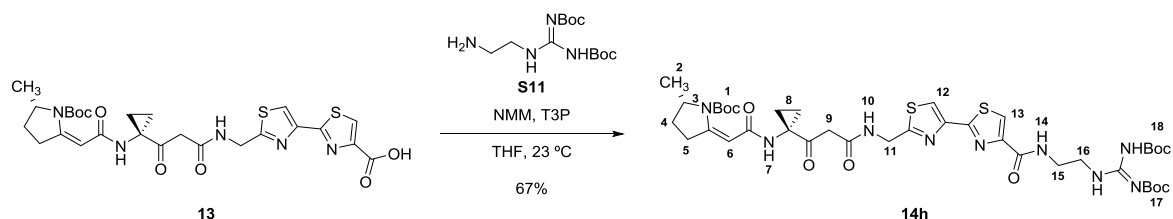

A solution of T3P in ethyl acetate (50 wt%, 22.7  $\mu\text{L}$ , 38.2  $\mu\text{mol}$ , 1.50 equiv) and 4-methylmorpholine (14.0  $\mu\text{L}$ , 127  $\mu\text{mol}$ , 5.00 equiv) were added in sequence to a solution of the acid **13** (15.0 mg, 25.4  $\mu\text{mol}$ , 1 equiv) in tetrahydrofuran (510  $\mu\text{L}$ ) at 23 °C. The reaction mixture was stirred for 20 min at 23 °C. The amine **S11** (17.3 mg, 57.2  $\mu\text{mol}$ , 2.25 equiv) was added to the reaction mixture. The resulting mixture was stirred for 7 h at 23 °C. The product mixture was concentrated. The residue obtained was purified by flash-column chromatography (eluting with dichloromethane initially, grading to 10% methanol–dichloromethane, linear gradient) to provide the amide **14h** as an off-white solid (14.9 mg, 67%).

$^1\text{H}$  NMR (500 MHz,  $\text{CD}_2\text{Cl}_2$ )  $\delta$  11.50 (bs, 1H), 8.49 (bs, 1H), 8.11 – 8.03 (m, 2H, H<sub>10</sub>, H<sub>13</sub>), 7.96 (s, 1H, H<sub>12</sub>), 7.70 – 7.64 (m, 1H, H<sub>14</sub>), 6.55 (s, 1H, H<sub>6</sub>), 6.25 (bs, 1H, H<sub>7</sub>), 4.75 (d,  $J$  = 5.9 Hz, 2H, H<sub>11</sub>), 4.29 – 4.14 (m, 1H, H<sub>3</sub>), 3.66 (s, 2H, H<sub>9</sub>), 3.65 – 3.58 (m, 4H, H<sub>15</sub>, H<sub>16</sub>), 3.47 (dd,  $J$  = 18.3, 8.7 Hz, 1H, H<sub>5</sub>), 2.94 – 2.82 (m, 1H, H<sub>5</sub>), 1.98 – 1.86 (m, 1H, H<sub>4</sub>), 1.65 – 1.59 (m, 2H, H<sub>8</sub>), 1.60 – 1.52 (m, 1H, H<sub>4</sub>), 1.49 (s, 9H, H<sub>1</sub>), 1.48 (s, 9H, H<sub>17</sub>), 1.44 (s, 9H, H<sub>18</sub>), 1.17 (d,  $J$  = 6.2 Hz, 3H, H<sub>2</sub>), 1.18 – 1.12 (m, 2H, H<sub>8</sub>).  $^{13}\text{C}$  NMR (126 MHz,  $\text{CD}_2\text{Cl}_2$ )  $\delta$  206.1 (C), 170.6 (C), 170.3 (C), 167.2 (C), 164.0 (C), 163.0 (C), 161.8 (C), 157.2 (C), 156.9 (C), 153.6 (C), 152.4 (C), 151.3 (C), 148.8 (C), 123.9 (CH), 117.8 (CH), 97.2 (CH), 83.7 (C), 82.2 (C), 79.5 (C), 57.4 (CH), 45.6 (CH<sub>2</sub>), 42.0 (C), 41.6 (CH<sub>2</sub>), 40.9 (CH<sub>2</sub>), 39.2 (CH<sub>2</sub>), 30.2 (CH<sub>2</sub>), 28.8 (CH<sub>3</sub>), 28.8 (CH<sub>2</sub>), 28.6 (CH<sub>3</sub>), 28.5 (CH<sub>3</sub>), 21.6 (CH<sub>2</sub>), 21.6 (CH<sub>2</sub>), 19.8 (CH<sub>3</sub>). IR (ATR-FTIR),  $\text{cm}^{-1}$ : 3323 (br w), 2976 (w), 2934 (w), 1716 (m), 1639 (s), 1611 (s), 1544 (w), 1316 (m), 1289 (m), 1133 (s), 1024 (m), 771 (w). HRMS-Cl ( $m/z$ ):  $[\text{M} + \text{H}]^+$  calcd for  $\text{C}_{39}\text{H}_{56}\text{N}_9\text{O}_{10}\text{S}_2$ , 874.3586; found, 874.3583.  $[\alpha]_{\text{D}}^{20}$  +27.0 ( $c$  1.0,  $\text{CH}_2\text{Cl}_2$ ).

Synthesis of the amide **14i**:

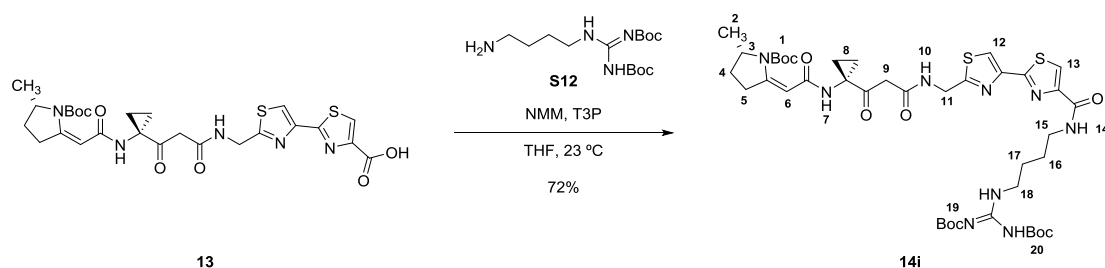

A solution of T3P in ethyl acetate (50 wt%, 30.3  $\mu\text{L}$ , 50.9  $\mu\text{mol}$ , 1.50 equiv) and 4-methylmorpholine (18.6  $\mu\text{L}$ , 170  $\mu\text{mol}$ , 5.00 equiv) were added in sequence to a solution of the acid **13** (20.0 mg, 33.9  $\mu\text{mol}$ , 1 equiv) in tetrahydrofuran (680  $\mu\text{L}$ ) at 23 °C. The reaction mixture was stirred for 20 min at 23 °C. The amine **S12** (39.2 mg, 119  $\mu\text{mol}$ , 3.50 equiv) was added to the reaction mixture. The resulting mixture was stirred for 7 h at 23 °C. The product mixture was concentrated. The residue obtained was purified by flash-column chromatography (eluting with dichloromethane initially, grading to 10% methanol–dichloromethane, linear gradient) to provide the amide **14i** as an off-white solid (22.1 mg, 72%).

$^1\text{H}$  NMR (600 MHz,  $\text{CD}_2\text{Cl}_2$ )  $\delta$  11.50 (bs, 1H), 8.29 (t,  $J = 5.5$  Hz, 1H), 8.11 (t,  $J = 6.0$  Hz, 1H, H<sub>10</sub>), 8.06 (s, 1H, H<sub>13</sub>), 7.95 (s, 1H, H<sub>12</sub>), 7.49 (t,  $J = 6.2$  Hz, 1H, H<sub>14</sub>), 6.56 (s, 1H, H<sub>6</sub>), 6.39 (bs, 1H, H<sub>7</sub>), 4.76 (d,  $J = 6.2$  Hz, 2H, H<sub>11</sub>), 4.34 – 4.16 (m, 1H, H<sub>3</sub>), 3.66 (s, 2H, H<sub>9</sub>), 3.56 – 3.43 (m, 3H, H<sub>5</sub>, H<sub>15</sub>), 3.41 (app q,  $J = 6.1$  Hz, 2H, H<sub>18</sub>), 2.89 (dt,  $J = 18.6, 9.8$  Hz, 1H, H<sub>5</sub>), 1.92 (ddd,  $J = 20.9, 12.0, 8.4$  Hz, 1H, H<sub>4</sub>), 1.71 – 1.63 (m, 4H, H<sub>16</sub>, H<sub>17</sub>), 1.64 – 1.59 (m, 2H, H<sub>8</sub>), 1.60 – 1.52 (m, 1H, H<sub>4</sub>), 1.49 (s, 9H, H<sub>1</sub>), 1.49 (s, 9H, H<sub>19</sub>), 1.44 (s, 9H, H<sub>20</sub>), 1.17 (d,  $J = 6.6$  Hz, 3H, H<sub>2</sub>), 1.16 – 1.13 (m, 2H, H<sub>8</sub>).  $^{13}\text{C}$  NMR (126 MHz,  $\text{CD}_2\text{Cl}_2$ )  $\delta$  206.1 (C), 170.6 (C), 170.3 (C), 167.2 (C), 164.1 (C), 163.0 (C), 161.4 (C), 156.9 (C), 156.7 (C), 153.8 (C), 152.4 (C), 151.7 (C), 148.8 (C), 123.7 (CH), 117.7 (CH), 97.2 (CH), 83.6 (C), 82.2 (C), 79.3 (C), 57.5 (CH), 45.6 (CH<sub>2</sub>), 42.0 (C), 41.7 (CH<sub>2</sub>), 41.0 (CH<sub>2</sub>), 39.5 (CH<sub>2</sub>), 30.2 (CH<sub>2</sub>), 28.9 (CH<sub>2</sub>), 28.6 (CH<sub>3</sub>), 28.5 (CH<sub>3</sub>), 28.4 (CH<sub>3</sub>), 27.8 (CH<sub>2</sub>), 27.2 (CH<sub>2</sub>), 21.6 (CH<sub>2</sub>), 21.6 (CH<sub>2</sub>), 19.9 (CH<sub>3</sub>). IR (ATR-FTIR),  $\text{cm}^{-1}$ : 3324 (br w), 2974 (w), 2935 (w), 1716 (m), 1639 (s), 1612 (s), 1366 (m), 1316 (m), 1290 (m), 1155 (s), 1132 (s), 1051 (m), 1026 (m), 771 (w). HRMS-Cl ( $m/z$ ):  $[\text{M} + \text{H}]^+$  calcd for  $\text{C}_{41}\text{H}_{60}\text{N}_9\text{O}_{10}\text{S}_2$ , 902.3899; found, 902.3901.  $[\alpha]_{\text{D}}^{20} +15.0$  ( $c$  1.0,  $\text{CH}_2\text{Cl}_2$ ).

### Synthesis of the lactam **15e**:

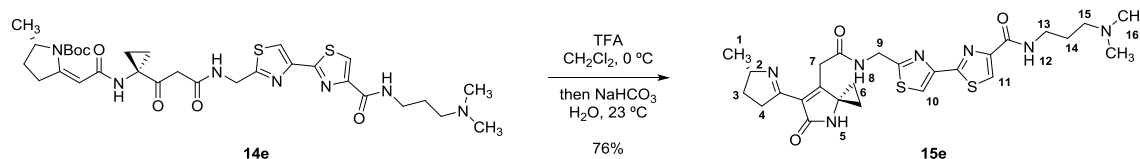

Trifluoroacetic acid (219  $\mu$ L, 2.87 mmol, 120 equiv) was added dropwise via syringe to a solution of the amide **14e** (16.1 mg, 23.9  $\mu$ mol, 1 equiv) in dichloromethane (600  $\mu$ L) at 0 °C. The reaction mixture was stirred for 14 h at 0 °C. The reaction mixture was concentrated. The concentrated reaction mixture was diluted with saturated aqueous sodium bicarbonate solution (1.3 mL). The diluted reaction mixture was stirred for 1 h at 23 °C. The product mixture was diluted sequentially with water (1.0 mL) and ethyl acetate (3.0 mL). The diluted product mixture was transferred to a separatory funnel and the layers that formed were separated. The aqueous layer was extracted with ethyl acetate (5  $\times$  3.0 mL). The organic layers were combined and the combined organic layers were dried over sodium sulfate. The dried solution was filtered and the filtrate was concentrated to provide the lactam **15e** as a light yellow solid (10.1 mg, 76%). The product so obtained was used without further purification.

<sup>1</sup>H NMR (500 MHz, DMSO-*d*<sub>6</sub>)  $\delta$  10.29 (t,  $J$  = 5.9 Hz, 1H, H<sub>8</sub>), 8.70 – 8.58 (m, 2H, H<sub>5</sub>, H<sub>12</sub>), 8.24 (s, 1H, H<sub>11</sub>), 8.17 (s, 1H, H<sub>10</sub>), 4.65 – 4.57 (m, 2H, H<sub>9</sub>), 4.16 – 4.08 (m, 1H, H<sub>2</sub>), 3.35 – 3.29 (m, 4H, H<sub>7</sub>, H<sub>13</sub>), 3.15 – 3.02 (m, 1H, H<sub>4</sub>), 2.86 (dt,  $J$  = 17.7, 8.8 Hz, 1H, H<sub>4</sub>), 2.28 (t,  $J$  = 6.9 Hz, 2H, H<sub>15</sub>), 2.15 (s, 6H, H<sub>16</sub>), 2.12 – 2.04 (m, 1H, H<sub>3</sub>), 1.71 – 1.63 (m, 4H, H<sub>6</sub>, H<sub>14</sub>), 1.41 – 1.31 (m, 3H, H<sub>3</sub>, H<sub>6</sub>), 1.18 (d,  $J$  = 6.6 Hz, 3H, H<sub>1</sub>). <sup>13</sup>C NMR (126 MHz, DMSO-*d*<sub>6</sub>)  $\delta$  171.2 (C), 169.7 (C), 168.4 (C), 168.3 (C), 161.7 (C), 160.3 (C), 157.7 (C), 151.0 (C), 147.5 (C), 127.4 (C), 123.9 (CH), 117.9 (CH), 66.6 (CH), 57.3 (CH<sub>2</sub>), 45.3 (C), 45.2 (CH<sub>3</sub>), 40.4 (CH<sub>2</sub>), 37.7 (CH<sub>2</sub>), 36.6 (CH<sub>2</sub>), 33.5 (CH<sub>2</sub>), 29.7 (CH<sub>2</sub>), 26.9 (CH<sub>2</sub>), 21.9 (CH<sub>3</sub>), 11.9 (CH<sub>2</sub>), 11.8 (CH<sub>2</sub>). HRMS-Cl (m/z): [M + H]<sup>+</sup> calcd for C<sub>26</sub>H<sub>34</sub>N<sub>7</sub>O<sub>3</sub>S<sub>2</sub>, 556.2159; found, 556.2151.  $[\alpha]_{\text{D}}^{20}$  –5.5 ( $c$  3.1, DMSO-*d*<sub>6</sub>).



### Synthesis of the lactam **15f**:

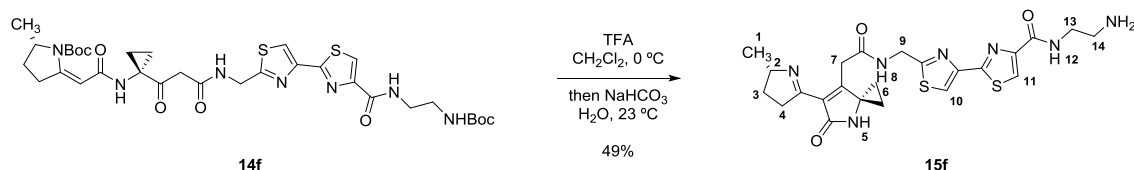

Trifluoroacetic acid (125  $\mu$ L, 1.64 mmol, 120 equiv) was added dropwise via syringe to a solution of the amide **14f** (10.0 mg, 13.7  $\mu$ mol, 1 equiv) in dichloromethane (340  $\mu$ L) at 0 °C. The reaction mixture was stirred for 14 h at 0 °C. The reaction mixture was concentrated. The concentrated reaction mixture was diluted with saturated aqueous sodium bicarbonate solution (700  $\mu$ L). The diluted reaction mixture was stirred for 1 h at 23 °C. The product mixture was diluted sequentially with water (1.0 mL) and ethyl acetate (3.0 mL). The diluted product mixture was transferred to a separatory funnel and the layers that formed were separated. The aqueous layer was extracted with ethyl acetate (5  $\times$  3.0 mL). The organic layers were combined and the combined organic layers were dried over sodium sulfate. The dried solution was filtered and the filtrate was concentrated to provide the lactam **15f** as a light yellow solid (3.4 mg, 49%). The product so obtained was used without further purification.

<sup>1</sup>H NMR (500 MHz, DMSO-*d*<sub>6</sub>)  $\delta$  10.30 (t,  $J$  = 6.0 Hz, 1H, H<sub>8</sub>), 8.62 (bs, 1H, H<sub>5</sub>), 8.44 (t,  $J$  = 5.9 Hz, 1H, H<sub>12</sub>), 8.28 (s, 1H, H<sub>11</sub>), 8.19 (s, 1H, H<sub>10</sub>), 4.64 – 4.58 (m, 2H, H<sub>9</sub>), 4.17 – 4.08 (m, 1H, H<sub>2</sub>), 3.38 – 3.29 (m, 4H, H<sub>7</sub>, H<sub>13</sub>), 3.14 – 3.06 (m, 1H, H<sub>4</sub>), 2.87 (dt,  $J$  = 17.8, 8.7 Hz, 1H, H<sub>4</sub>), 2.77 (t,  $J$  = 6.5 Hz, 2H, H<sub>14</sub>), 2.10 – 2.04 (m, 1H, H<sub>3</sub>), 1.71 – 1.66 (m, 2H, H<sub>6</sub>), 1.41 – 1.30 (m, 3H, H<sub>3</sub>, H<sub>6</sub>), 1.19 (d,  $J$  = 6.7 Hz, 3H, H<sub>1</sub>). <sup>13</sup>C NMR (126 MHz, DMSO-*d*<sub>6</sub>)  $\delta$  171.2 (C), 169.7 (C), 168.4 (C), 168.3 (C), 161.7 (C), 160.6 (C), 157.7 (C), 150.9 (C), 147.4 (C), 127.4 (C), 124.2 (CH), 118.0 (CH), 66.6 (CH), 45.3 (C), 40.9 (CH<sub>2</sub>), 40.7 (CH<sub>2</sub>), 40.4 (CH<sub>2</sub>), 36.6 (CH<sub>2</sub>), 33.6 (CH<sub>2</sub>), 29.7 (CH<sub>2</sub>), 21.9 (CH<sub>3</sub>), 11.9 (CH<sub>2</sub>), 11.8 (CH<sub>2</sub>). HRMS-Cl (m/z): [M + H]<sup>+</sup> calcd for C<sub>23</sub>H<sub>28</sub>N<sub>7</sub>O<sub>3</sub>S<sub>2</sub>, 514.1690; found, 514.1690. [ $\alpha$ ]<sub>D</sub><sup>20</sup> -1.7 (*c* 1.2, DMSO-*d*<sub>6</sub>).

### Synthesis of the lactam **15g**:

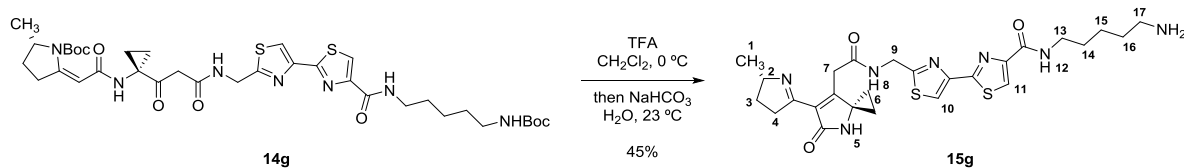

Trifluoroacetic acid (108  $\mu$ L, 1.41 mmol, 120 equiv) was added dropwise via syringe to a solution of the amide **14g** (9.1 mg, 11.8  $\mu$ mol, 1 equiv) in dichloromethane (290  $\mu$ L) at 0 °C. The reaction mixture was stirred for 14 h at 0 °C. The reaction mixture was concentrated. The concentrated reaction mixture was diluted with saturated aqueous sodium bicarbonate solution (650  $\mu$ L). The diluted reaction mixture was stirred for 1 h at 23 °C. The product mixture was diluted sequentially with water (1.0 mL) and ethyl acetate (3.0 mL). The diluted product mixture was transferred to a separatory funnel and the layers that formed were separated. The aqueous layer was extracted with ethyl acetate (5  $\times$  3.0 mL). The organic layers were combined and the combined organic layers were dried over sodium sulfate. The dried solution was filtered and the filtrate was concentrated to provide the lactam **15g** as a light yellow solid (3.4 mg, 45%). The product so obtained was used without further purification.

<sup>1</sup>H NMR (500 MHz, DMSO-*d*<sub>6</sub>)  $\delta$  10.34 – 10.26 (m, 1H, H<sub>8</sub>), 8.61 (bs, 1H, H<sub>5</sub>), 8.44 – 8.38 (m, 1H, H<sub>12</sub>), 8.25 (s, 1H, H<sub>11</sub>), 8.19 (s, 1H, H<sub>10</sub>), 4.64 – 4.59 (m, 2H, H<sub>9</sub>), 4.17 – 4.07 (m, 1H, H<sub>2</sub>), 3.35 – 3.26 (m, 4H, H<sub>7</sub>, H<sub>13</sub>), 3.15 – 3.05 (m, 1H, H<sub>4</sub>), 2.87 (dt, *J* = 18.0, 8.9 Hz, 1H, H<sub>4</sub>), 2.73 (t, *J* = 7.5 Hz, 2H, H<sub>17</sub>), 2.15 – 2.05 (m, 1H, H<sub>3</sub>), 1.72 – 1.66 (m, 2H, H<sub>6</sub>), 1.58 – 1.50 (m, 4H, H<sub>14</sub>, H<sub>16</sub>), 1.39 – 1.32 (m, 5H, H<sub>3</sub>, H<sub>6</sub>, H<sub>15</sub>), 1.19 (d, *J* = 6.7 Hz, 3H, H<sub>1</sub>). <sup>13</sup>C NMR (126 MHz, DMSO-*d*<sub>6</sub>)  $\delta$  171.1 (C), 169.6 (C), 168.4 (C), 168.3 (C), 161.7 (C), 160.3 (C), 157.7 (C), 151.0 (C), 147.5 (C), 127.4 (C), 124.0 (CH), 117.9 (CH), 66.5 (CH), 45.3 (C), 40.4 (CH<sub>2</sub>), 39.3 (CH<sub>2</sub>), 38.5 (CH<sub>2</sub>), 36.5 (CH<sub>2</sub>), 33.5 (CH<sub>2</sub>), 29.7 (CH<sub>2</sub>), 28.8 (CH<sub>2</sub>), 27.9 (CH<sub>2</sub>), 23.4 (CH<sub>2</sub>), 21.9 (CH<sub>3</sub>), 11.8 (CH<sub>2</sub>), 11.8 (CH<sub>2</sub>). HRMS-CI (*m/z*): [M + H]<sup>+</sup> calcd for C<sub>26</sub>H<sub>34</sub>N<sub>7</sub>O<sub>3</sub>S<sub>2</sub>, 556.2159; found, 556.2167. [ $\alpha$ ]<sub>D</sub><sup>20</sup> +2.5 (*c* 1.2, DMSO-*d*<sub>6</sub>).

### Synthesis of the lactam **15h**:

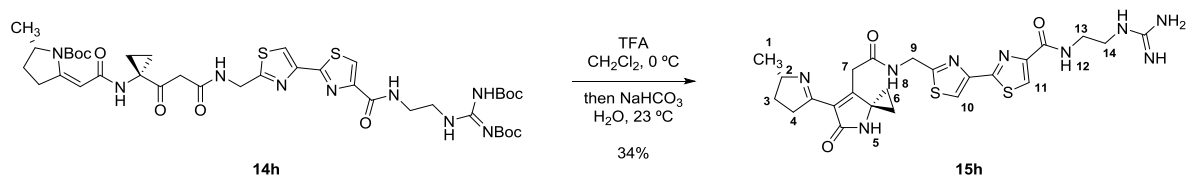

Trifluoroacetic acid (105  $\mu$ L, 1.37 mmol, 120 equiv) was added dropwise via syringe to a solution of the amide **14h** (10.0 mg, 11.4  $\mu$ mol, 1 equiv) in dichloromethane (290  $\mu$ L) at 0 °C. The reaction mixture was stirred for 14 h at 0 °C. The reaction mixture was concentrated. The concentrated reaction mixture was diluted with saturated aqueous sodium bicarbonate solution (650  $\mu$ L). The diluted reaction mixture was stirred for 1 h at 23 °C. The product mixture was diluted sequentially with water (1.0 mL) and ethyl acetate (3.0 mL). The diluted product mixture was transferred to a separatory funnel and the layers that formed were separated. The aqueous layer was extracted with ethyl acetate (5  $\times$  3.0 mL). The organic layers were combined and the combined organic layers were dried over sodium sulfate. The dried solution was filtered and the filtrate was concentrated to provide the lactam **15h** as a light yellow solid (2.2 mg, 34%). The product so obtained was used without further purification.

<sup>1</sup>H NMR (600 MHz, DMSO-*d*<sub>6</sub>)  $\delta$  10.31 (t, *J* = 6.1 Hz, 1H, H<sub>8</sub>), 8.58 (bs, 2H, H<sub>5</sub>, H<sub>12</sub>), 8.31 (s, 1H, H<sub>11</sub>), 8.16 (s, 1H, H<sub>10</sub>), 7.42 (bs, 1H), 4.65 – 4.60 (m, 2H, H<sub>9</sub>), 4.17 – 4.08 (m, 1H, H<sub>2</sub>), 3.47 – 3.41 (m, 2H, H<sub>13</sub>), 3.36 – 3.30 (m, 4H, H<sub>7</sub>, H<sub>14</sub>), 3.14 – 3.07 (m, 1H, H<sub>4</sub>), 2.87 (dt, *J* = 18.2, 8.9 Hz, 1H, H<sub>4</sub>), 2.12 – 2.04 (m, 1H, H<sub>3</sub>), 1.71 – 1.65 (m, 2H, H<sub>6</sub>), 1.53 – 1.43 (m, 1H, H<sub>3</sub>), 1.38 – 1.33 (m, 2H, H<sub>6</sub>), 1.19 (d, *J* = 6.6 Hz, 3H, H<sub>1</sub>). <sup>13</sup>C NMR (126 MHz, DMSO-*d*<sub>6</sub>)  $\delta$  171.2 (C), 169.6 (C), 168.4 (C), 168.3 (C), 161.9 (C), 160.9 (C), 157.6 (C), 157.0 (C), 150.5 (C), 147.4 (C), 127.4 (C), 124.7 (CH), 117.9 (CH), 66.5 (CH), 45.3 (C), 40.4 (CH<sub>2</sub>), 40.4 (CH<sub>2</sub>), 38.0 (CH<sub>2</sub>), 36.5 (CH<sub>2</sub>), 33.5 (CH<sub>2</sub>), 29.7 (CH<sub>2</sub>), 21.9 (CH<sub>3</sub>), 11.8 (CH<sub>2</sub>), 11.7 (CH<sub>2</sub>). HRMS-Cl (m/z): [M + H]<sup>+</sup> calcd for C<sub>24</sub>H<sub>30</sub>N<sub>9</sub>O<sub>3</sub>S<sub>2</sub>, 556.1908; found, 556.1913.  $[\alpha]_D^{20}$  –5.5 (*c* 1.3, DMSO-*d*<sub>6</sub>).

### Synthesis of the lactam **15i**:

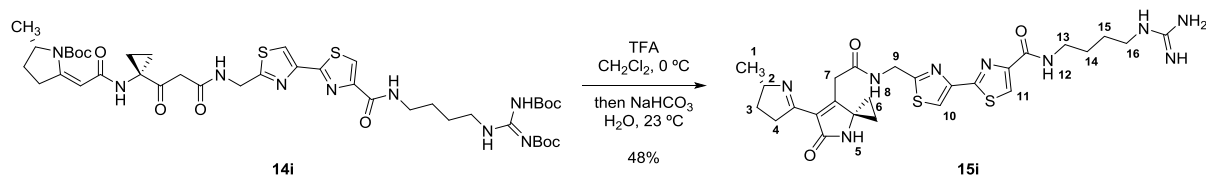

Trifluoroacetic acid (164  $\mu$ L, 2.14 mmol, 120 equiv) was added dropwise via syringe to a solution of the amide **14i** (16.1 mg, 17.8  $\mu$ mol, 1 equiv) in dichloromethane (450  $\mu$ L) at 0 °C. The reaction mixture was stirred for 14 h at 0 °C. The reaction mixture was concentrated. The concentrated reaction mixture was diluted with saturated aqueous sodium bicarbonate solution (1.0 mL). The diluted reaction mixture was stirred for 1 h at 23 °C. The product mixture was diluted sequentially with water (1.0 mL) and ethyl acetate (3.0 mL). The diluted product mixture was transferred to a separatory funnel and the layers that formed were separated. The aqueous layer was extracted with ethyl acetate (5  $\times$  3.0 mL). The organic layers were combined and the combined organic layers were dried over sodium sulfate. The dried solution was filtered and the filtrate was concentrated to provide the lactam **15i** as a light yellow solid (5.0 mg, 48%). The product so obtained was used without further purification.

<sup>1</sup>H NMR (500 MHz, DMSO-*d*<sub>6</sub>)  $\delta$  10.34 – 10.28 (m, 1H, H<sub>8</sub>), 8.63 (bs, 1H, H<sub>5</sub>), 8.50 (t, *J* = 6.2 Hz, 1H, H<sub>12</sub>), 8.26 (s, 1H, H<sub>11</sub>), 8.19 (s, 1H, H<sub>10</sub>), 7.88 (bs, 1H), 4.64 – 4.58 (m, 2H, H<sub>9</sub>), 4.16 – 4.08 (m, 1H, H<sub>2</sub>), 3.34 – 3.27 (m, 4H, H<sub>7</sub>, H<sub>13</sub>), 3.15 – 3.05 (m, 3H, H<sub>4</sub>, H<sub>16</sub>), 2.87 (dt, *J* = 17.8, 8.8 Hz, 1H, H<sub>4</sub>), 2.11 – 2.04 (m, 1H, H<sub>3</sub>), 1.70 – 1.63 (m, 2H, H<sub>6</sub>), 1.60 – 1.52 (m, 2H, H<sub>14</sub>), 1.53 – 1.46 (m, 2H, H<sub>15</sub>), 1.38 – 1.33 (m, 3H, H<sub>3</sub>, H<sub>6</sub>), 1.18 (d, *J* = 6.6 Hz, 3H, H<sub>1</sub>). <sup>13</sup>C NMR (126 MHz, DMSO-*d*<sub>6</sub>)  $\delta$  171.2 (C), 169.7 (C), 168.4 (C), 168.3 (C), 161.7 (C), 160.5 (C), 157.7 (C), 156.9 (C), 150.9 (C), 147.5 (C), 127.4 (C), 124.1 (CH), 117.9 (CH), 66.6 (CH), 45.3 (C), 40.4 (CH<sub>2</sub>), 40.4 (CH<sub>2</sub>), 38.2 (CH<sub>2</sub>), 36.6 (CH<sub>2</sub>), 33.6 (CH<sub>2</sub>), 29.7 (CH<sub>2</sub>), 26.5 (CH<sub>2</sub>), 26.1 (CH<sub>2</sub>), 21.9 (CH<sub>3</sub>), 11.9 (CH<sub>2</sub>), 11.8 (CH<sub>2</sub>). HRMS-CI (*m/z*): [M + H]<sup>+</sup> calcd for C<sub>26</sub>H<sub>34</sub>N<sub>9</sub>O<sub>3</sub>S<sub>2</sub>, 584.2221; found, 584.2221. [ $\alpha$ ]<sub>D</sub><sup>20</sup> +3.1 (*c* 2.6, DMSO-*d*<sub>6</sub>).

### Synthesis of the ethyl ester **S14**:

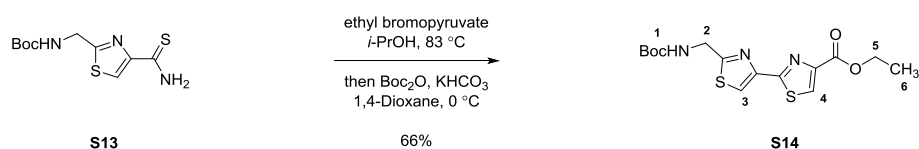

Ethyl bromopyruvate (3.01 g, 15.4 mmol, 1.50 equiv) was added to a solution of the thioamide **S13** (2.82 g, 10.3 mmol, 1 equiv) in *iso*-propanol (100 mL) at 23 °C. The reaction mixture was stirred for 16 h at 83 °C. The reaction mixture was concentrated. The residue obtained was dissolved in 1,4-dioxane (45 mL) and the resulting solution was cooled to 0 °C. Di-*tert*-butyl dicarbonate (3.60 g, 16.5 mmol, 1.60 equiv) and a solution of aqueous potassium bicarbonate (1N, 15 mL) were then added sequentially to the cooled solution. The reaction mixture was stirred for 16 h at 0 °C. The product mixture was concentrated and the residue obtained was applied to a trimethylamine acetate-functionalized silica column (Si-TMA acetate; eluting with 2% acetic acid–methanol) to provide the bithiazole **S14** as a white solid (2.51 g, 66%).

$^1\text{H}$  NMR (600 MHz, DMSO- $d_6$ )  $\delta$  8.55 (s, 1H, H<sub>4</sub>), 8.27 (s, 1H, H<sub>3</sub>), 7.87 (t,  $J = 6.2$  Hz, 1H), 4.45 (d,  $J = 6.1$  Hz, 2H, H<sub>2</sub>), 4.34 (q,  $J = 7.1$  Hz, 2H, H<sub>5</sub>), 1.42 (s, 9H, H<sub>1</sub>), 1.33 (t,  $J = 7.1$  Hz, 3H, H<sub>6</sub>).  $^{13}\text{C}$  NMR (151 MHz, DMSO- $d_6$ )  $\delta$  172.9 (C), 162.5 (C), 160.7 (C), 155.8 (C), 147.1 (C), 147.0 (C), 129.4 (CH), 118.2 (CH), 78.7 (C), 60.9 (CH<sub>2</sub>), 41.9 (CH<sub>2</sub>), 28.2 (CH<sub>3</sub>), 14.2 (CH<sub>3</sub>). IR (ATR-FTIR),  $\text{cm}^{-1}$ : 3343 (m), 3130 (w), 3109 (w), 2983 (w), 1721 (s), 1686 (s), 1526 (s), 1298 (m), 1284 (m), 1204 (s), 1164 (s), 1100 (s), 819 (m), 770 (m), 621 (m). HRMS-Cl ( $m/z$ ):  $[\text{M} + \text{H}]^+$  calcd for C<sub>15</sub>H<sub>20</sub>N<sub>3</sub>O<sub>4</sub>S<sub>2</sub>, 370.0890; found, 370.0882.

### Synthesis of the acid **S15**:

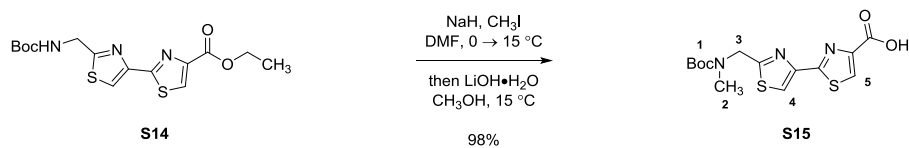

A dispersion of sodium hydride in mineral oil (60%, 109 mg, 2.83 mmol, 2.00 equiv) was added slowly to a solution of the bithiazole **S14** (523 mg, 1.42 mmol, 1 equiv) and iodomethane (793  $\mu$ L, 12.7 mmol, 9.00 equiv) in *N,N*-dimethylformamide (6.0 mL) at  $-5$   $^{\circ}$ C. The reaction mixture was stirred for 30 min at  $-5$   $^{\circ}$ C and then was warmed to 15  $^{\circ}$ C. The warmed mixture was stirred for 14 h at 15  $^{\circ}$ C. Lithium hydroxide (891 mg, 21.2 mmol, 15.0 equiv) and water (6.0 mL) were then added in sequence to the reaction mixture. The reaction mixture was stirred for 3 h at 15  $^{\circ}$ C. The heterogeneous product mixture was filtered through a fritted funnel. The filter cake was washed with methanol (10 mL). The filtrates were combined and the combined filtrates were concentrated. The product mixture was diluted sequentially with saturated aqueous ammonium chloride solution (10 mL) and ethyl acetate (10 mL). The diluted product mixture was transferred to a separatory funnel and the layers that formed were separated. The aqueous layer was extracted with ethyl acetate ( $3 \times 5.0$  mL). The organic layers were combined and the combined organic layers were dried over sodium sulfate. The dried solution was filtered and the filtrate was concentrated. The concentrated product mixture was applied to a column containing trimethylamine acetate-functionalized silica gel (Si-TMA acetate; eluting with 2% acetic acid–methanol). The fractions containing product were collected, combined, and concentrated to provide the acid **S15** as a white solid (495 mg, 98%).

In DMSO-*d*<sub>6</sub> at room temperature the title compound exists as an approximate 1:1 mixture of amide-bond rotamers.

$^1\text{H}$  NMR (600 MHz, DMSO-*d*<sub>6</sub>)  $\delta$  8.36 (s, 1H, H<sub>5</sub>), 8.28 (s, 1H, H<sub>4</sub>), 4.71 (s, 2H, H<sub>3</sub>), 2.92 (d, 3H, H<sub>2</sub>), 1.42 (d, 9H, H<sub>1</sub>).  $^{13}\text{C}$  NMR (151 MHz, DMSO-*d*<sub>6</sub>)  $\delta$  169.9 (C), 162.4 (C), 161.6 (C), 154.7 (d, C), 150.1 (C), 147.5 (C), 127.6 (CH), 118.1 (CH), 79.6 (C), 49.8 (d, CH<sub>2</sub>), 34.7 (d, CH<sub>3</sub>), 27.9 (d, CH<sub>3</sub>). IR (ATR-FTIR),  $\text{cm}^{-1}$ : 3113 (w), 2975 (w), 1681 (s), 1484 (m), 1392 (m), 1295 (m), 1240 (m), 1167 (s), 751 (m), 564 (w). HRMS-CI (*m/z*): [M + H]<sup>+</sup> calcd for C<sub>14</sub>H<sub>17</sub>N<sub>3</sub>NaO<sub>4</sub>S<sub>2</sub>, 378.0553; found, 378.0554.

*Synthesis of the hydrochloride salt S16:*

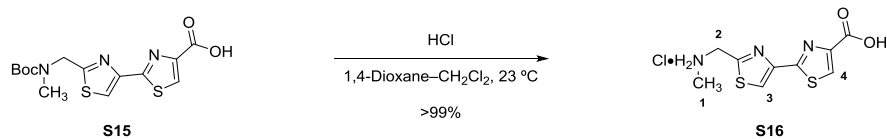

A solution of hydrogen chloride in 1,4-dioxane (4.0 N, 8.0 mL, 32.0 mmol, 24.1 equiv) was added dropwise via syringe to a solution of the bithiazole **S15** (472 mg, 1.33 mmol, 1 equiv) in dichloromethane (24 mL) at 23 °C. The resulting mixture was stirred for 1 h at 23 °C. The product mixture was concentrated to provide the hydrochloride salt **S16** as a white solid (387 mg, >99%). The product **S16** obtained in this way was used directly in the following step.

<sup>1</sup>H NMR (600 MHz, DMSO-*d*<sub>6</sub>) δ 9.72 (bs, 2H), 8.52 (s, 1H, H<sub>4</sub>), 8.45 (s, 1H, H<sub>3</sub>), 4.61 (t, *J* = 5.8 Hz, 2H, H<sub>2</sub>), 2.66 (t, *J* = 5.3 Hz, 3H, H<sub>1</sub>). <sup>13</sup>C NMR (151 MHz, DMSO-*d*<sub>6</sub>) δ 162.0 (C), 161.9 (C), 161.6 (C), 148.2 (C), 147.5 (C), 129.3 (CH), 120.7 (CH), 47.3 (CH<sub>2</sub>), 32.5 (CH<sub>3</sub>).

### Synthesis of the acid **S18**:

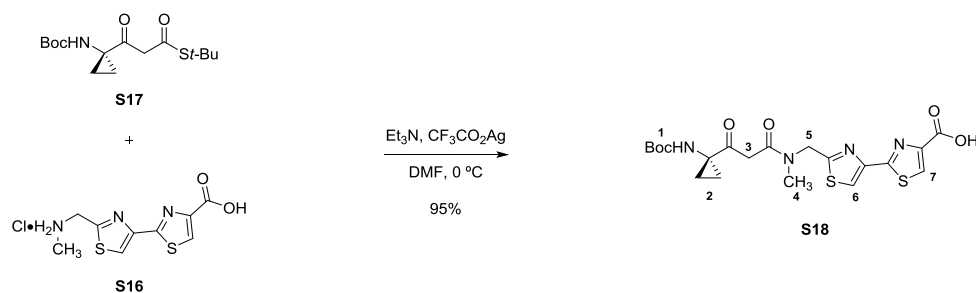

A solution of the β-ketothioester **S17** (506 mg, 1.60 mmol, 1.30 equiv) in *N,N*-dimethylformamide (3.0 mL) was added dropwise via syringe over 20 min to a mixture of silver trifluoroacetate (545 mg, 2.47 mmol, 2.00 equiv), triethylamine (688 μL, 4.94 mmol, 4.00 equiv), and the acid **S16** (360 mg, 1.23 mmol, 1 equiv) in *N,N*-dimethylformamide (12 mL) at 0 °C. The reaction mixture was stirred for 1 h at 0 °C. The heterogeneous product mixture was filtered through a fritted funnel. The filter cake was washed with methanol (12 mL). The filtrates were combined and the combined filtrates were concentrated. The concentrated product mixture was applied to a column containing trimethylamine acetate-functionalized silica gel (Si-TMA acetate; eluting with 2% acetic acid–methanol). The fractions containing product were collected, combined, and concentrated. The residue obtained was recrystallized from dichloromethane–hexanes (1:4; 50 mL) to provide the acid **S18** as a white solid. (565 mg, 95%).

In DMSO-*d*<sub>6</sub> at room temperature the title compound exists as a mixture (3.5:1) of amide-bond rotamers. The NMR signals are reported for the major isomer.

<sup>1</sup>H NMR (600 MHz, DMSO-*d*<sub>6</sub>) δ 13.14 (bs, 1H), 8.48 (s, 1H, H<sub>7</sub>), 8.30 (s, 1H, H<sub>6</sub>), 7.75 (bs, 1H), 4.83 (s, 2H, H<sub>5</sub>), 3.82 (s, 2H, H<sub>3</sub>), 2.98 (s, 3H, H<sub>4</sub>), 1.41 (s, 9H, H<sub>1</sub>), 1.41 – 1.36 (m, 2H, H<sub>2</sub>), 1.09 (q, *J* = 4.4 Hz, 2H, H<sub>2</sub>). <sup>13</sup>C NMR (151 MHz, DMSO-*d*<sub>6</sub>) δ 204.8 (C), 168.9 (C), 167.7 (C), 162.1 (C), 162.0 (C), 156.2 (C), 148.1 (C), 147.1 (C), 129.0 (CH), 118.9 (CH), 78.8 (C), 48.4 (CH<sub>2</sub>), 45.3 (CH<sub>2</sub>), 41.2 (C), 36.0 (CH<sub>3</sub>), 28.1 (CH<sub>3</sub>), 19.8 (CH<sub>2</sub>). IR (ATR-FTIR), cm<sup>-1</sup>: 3328 (m), 2935 (w), 1704 (s), 1680 (s), 1643 (s), 1506 (s), 1287 (m), 1236 (m), 1160 (s), 746.2 (m), 457 (m). HRMS-Cl (m/z): [M + H]<sup>+</sup> calcd for C<sub>20</sub>H<sub>25</sub>N<sub>4</sub>O<sub>6</sub>S<sub>2</sub>, 481.1210; found, 481.1215.



*Synthesis of the hydrochloride salt S19:*

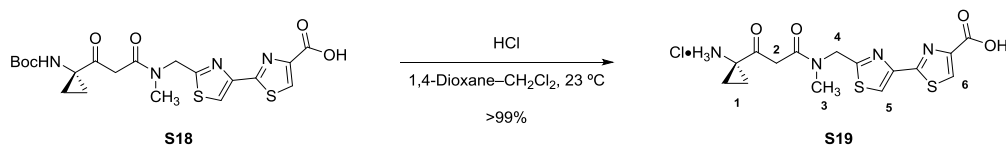

A solution of hydrogen chloride in 1,4-dioxane (4.0 N, 15.0 mL, 60.0 mmol, 54.5 equiv) was added dropwise via syringe to a solution of the bithiazole **S18** (527 mg, 1.10 mmol, 1 equiv) in dichloromethane (45.0 mL) at 23 °C. The resulting mixture was stirred for 3 h at 23 °C. The product mixture was concentrated to provide the hydrochloride salt **S19** as a white solid (457 mg, >99%). The product **S19** obtained in this way was used directly in the following step.

In DMSO-*d*<sub>6</sub> at room temperature the title compound exists as a mixture (3:1) of amide-bond rotamers. The NMR signals are reported for the major isomer.

<sup>1</sup>H NMR (600 MHz, DMSO-*d*<sub>6</sub>) δ 8.85 (bs, 3H), 8.49 (s, 1H, H<sub>6</sub>), 8.32 (s, 1H, H<sub>5</sub>), 4.84 (s, 2H, H<sub>4</sub>), 3.78 (s, 2H, H<sub>2</sub>), 3.05 (s, 3H, H<sub>3</sub>) 1.83 – 1.74 (m, 2H, H<sub>1</sub>), 1.56 – 1.44 (m, 2H, H<sub>1</sub>).  
<sup>13</sup>C NMR (151 MHz, DMSO-*d*<sub>6</sub>) δ 199.8 (C), 168.5 (C), 167.2 (C), 162.0 (C), 162.0 (C), 148.1 (C), 147.1 (C), 129.0 (CH), 118.9 (CH), 48.5 (CH<sub>2</sub>), 42.0 (C), 41.1 (CH<sub>2</sub>), 36.1 (CH<sub>3</sub>), 13.6 (CH<sub>2</sub>).

### Synthesis of the lactam **S20**:

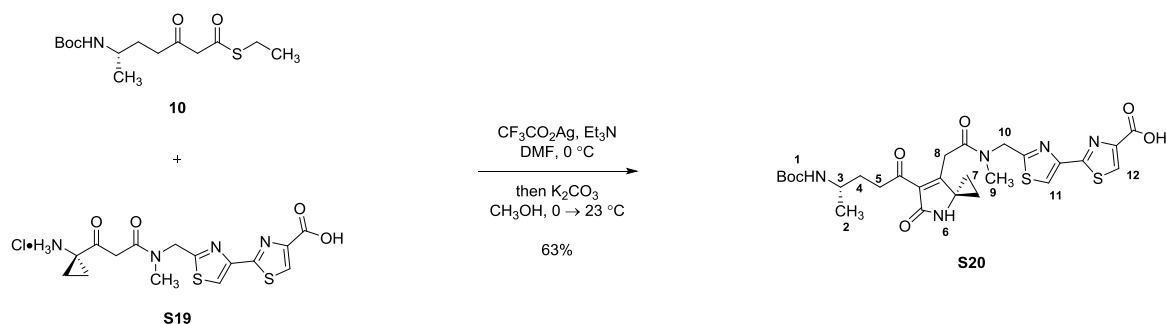

A solution of the thioester **10** (397 mg, 1.31 mmol, 1.30 equiv) in *N,N*-dimethylformamide (2.0 mL) was added dropwise via syringe over 20 min to a mixture of silver trifluoroacetate (445 mg, 2.01 mmol, 2.00 equiv), triethylamine (562  $\mu\text{L}$ , 4.03 mmol, 4.00 equiv), and the amine **S19** (420 mg, 1.01 mmol, 1 equiv) in *N,N*-dimethylformamide (10 mL) at  $0\text{ }^\circ\text{C}$ . The reaction mixture was stirred for 1 h at  $0\text{ }^\circ\text{C}$ . Potassium carbonate (418 mg, 3.02 mmol, 3.00 equiv) and methanol (10 mL) were then added in sequence to the reaction mixture at  $0\text{ }^\circ\text{C}$ . The reaction mixture was allowed to warm to  $23\text{ }^\circ\text{C}$  and stirred at this temperature for 6 h. The heterogeneous product mixture was filtered through a fritted funnel. The filter cake was washed with methanol (10 mL). The filtrates were combined and the combined filtrates were concentrated. The residue obtained was applied to a trimethylamine acetate-functionalized silica column (Si-TMA acetate; eluting with 0.5% formic acid–acetonitrile). The fractions containing the product **S20** were collected, combined, and concentrated to provide the lactam **S20** as a white solid (380 mg, 63%).

In  $\text{DMSO}-d_6$  at room temperature the title compound exists as a mixture (3:1) of amide-bond rotamers. The NMR signals are reported for the major isomer.

$^1\text{H}$  NMR (600 MHz,  $\text{DMSO}-d_6$ )  $\delta$  8.62 (bs, 1H,  $\text{H}_6$ ), 8.44 (s, 1H,  $\text{H}_{12}$ ), 8.28 (s, 1H,  $\text{H}_{11}$ ), 6.63 (bs, 1H), 4.82 (d,  $J = 15.7\text{ Hz}$ , 1H,  $\text{H}_{10}$ ), 4.78 (d,  $J = 15.8\text{ Hz}$ , 1H,  $\text{H}_{10}$ ), 3.62 (d,  $J = 16.2\text{ Hz}$ , 1H,  $\text{H}_8$ ), 3.55 (d,  $J = 16.2\text{ Hz}$ , 1H,  $\text{H}_8$ ), 3.46 – 3.38 (m, 1H,  $\text{H}_3$ ), 3.18 (s, 3H,  $\text{H}_9$ ), 2.91 – 2.83 (m, 2H,  $\text{H}_5$ ), 1.62 – 1.49 (m, 4H,  $\text{H}_4$ ,  $\text{H}_7$ ), 1.50 – 1.40 (m, 2H,  $\text{H}_7$ ), 1.36 (s, 9H,  $\text{H}_1$ ), 1.00 (d,  $J = 6.3\text{ Hz}$ , 3H,  $\text{H}_2$ ).  $^{13}\text{C}$  NMR (151 MHz,  $\text{DMSO}-d_6$ )  $\delta$  197.2 (C), 169.0 (C), 168.9 (C), 168.4 (C), 167.7 (C), 166.8 (C), 162.2 (C), 155.0 (C), 147.2 (C), 130.5 (C), 128.5 (CH), 118.7 (CH), 77.3 (C), 48.8 ( $\text{CH}_2$ ), 45.5 (C), 45.4 (CH), 38.4 ( $\text{CH}_2$ ), 35.9 ( $\text{CH}_3$ ), 29.9 ( $\text{CH}_2$ ), 29.7 ( $\text{CH}_2$ ), 28.3 ( $\text{CH}_3$ ), 20.9 ( $\text{CH}_3$ ), 13.3 ( $\text{CH}_2$ ). IR (ATR-FTIR),  $\text{cm}^{-1}$ : 3328 (br w), 2975 (w), 1792 (w), 676 (s), 1631 (s), 1501 (m), 1391 (m), 1169 (s), 1152 (s), 674 (w), 556 (m). HRMS-Cl ( $m/z$ ):  $[\text{M} + \text{Na}]^+$  calcd for  $\text{C}_{27}\text{H}_{33}\text{N}_5\text{NaO}_7\text{S}_2$ , 626.1714; found, 626.1716.  $[\alpha]_{\text{D}}^{20} +8.0$  ( $c$  1.0,  $\text{DMSO}$ ).

### Synthesis of the amide **19**:

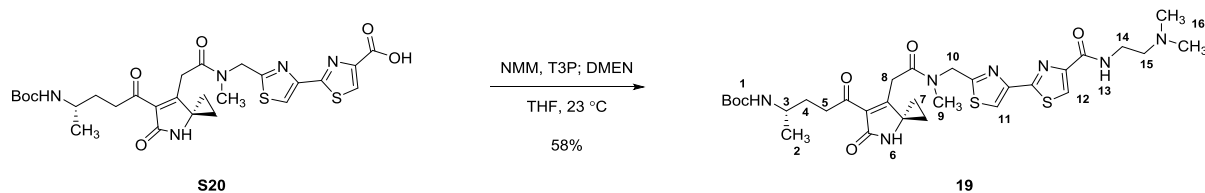

A solution of T3P in ethyl acetate (50 wt%, 118  $\mu\text{L}$ , 199  $\mu\text{mol}$ , 1.50 equiv) and 4-methylmorpholine (72.8  $\mu\text{L}$ , 663  $\mu\text{mol}$ , 5.00 equiv) were added in sequence to a solution of the acid **S20** (80.0 mg, 133  $\mu\text{mol}$ , 1 equiv) in tetrahydrofuran (2.7 mL) at 23 °C. The reaction mixture was stirred for 20 min at 23 °C. *N,N*-Dimethylethylenediamine (36.2  $\mu\text{L}$ , 331  $\mu\text{mol}$ , 2.50 equiv) was added to the reaction mixture. The resulting mixture was stirred for 14 h at 23 °C. The product mixture was concentrated. The concentrated product mixture was diluted with ethyl acetate (10 mL). The diluted product mixture was poured into a separatory funnel that had been charged with saturated aqueous sodium bicarbonate solution (5.0 mL) and the layers that formed were separated. The aqueous layer was extracted with ethyl acetate (2  $\times$  10 mL). The organic layers were combined and the combined organic layers were dried over sodium sulfate. The dried solution was filtered and the filtrate was concentrated to provide the amide **19** as a white solid (52.0 mg, 58%).

The product **19** obtained in this way was estimated to be of >95% purity by  $^1\text{H}$  and  $^{13}\text{C}$  NMR analysis (see accompanying spectra) and was used without further purification. In DMSO- $d_6$  at room temperature the title compound exists as a mixture (3:1) of amide-bond rotamers. The NMR signals are reported for the major isomer.

$^1\text{H}$  NMR (600 MHz, DMSO- $d_6$ )  $\delta$  8.62 (s, 1H, H<sub>6</sub>), 8.27 (bs, 1H, H<sub>12</sub>), 8.24 (s, 1H, H<sub>11</sub>), 8.23 (bs, 1H, H<sub>13</sub>), 6.63 (bs, 1H), 4.82 (d,  $J = 15.9$  Hz, 1H, H<sub>10</sub>), 4.79 (d,  $J = 15.9$  Hz, 1H, H<sub>10</sub>), 3.62 (d,  $J = 16.2$  Hz, 1H, H<sub>8</sub>), 3.55 (d,  $J = 16.1$  Hz, 1H, H<sub>8</sub>), 3.50 – 3.40 (m, 1H, H<sub>3</sub>), 3.39 (app q,  $J = 6.4$  Hz, 2H, H<sub>14</sub>), 3.18 (s, 3H, H<sub>9</sub>), 2.91 – 2.80 (m, 2H, H<sub>5</sub>), 2.42 (td,  $J = 6.6, 1.8$  Hz, 2H, H<sub>15</sub>), 2.18 (s, 6H, H<sub>16</sub>), 1.64 – 1.48 (m, 4H, H<sub>4</sub>, H<sub>7</sub>), 1.47 – 1.38 (m, 2H, H<sub>7</sub>), 1.36 (s, 9H, H<sub>1</sub>), 1.00 (d,  $J = 6.5$  Hz, 3H, H<sub>2</sub>).  $^{13}\text{C}$  NMR (151 MHz, DMSO- $d_6$ )  $\delta$  197.2 (C), 169.1 (C), 169.0 (C), 168.4 (C), 166.8 (C), 161.8 (C), 160.2 (C), 155.0 (C), 150.8 (C), 147.1 (C), 130.5 (C), 124.1 (CH), 118.7 (CH), 77.3 (C), 58.1 (CH<sub>2</sub>), 48.8 (CH<sub>2</sub>), 45.5 (C), 45.4 (CH), 45.2 (CH<sub>3</sub>), 38.4 (CH<sub>2</sub>), 36.7 (CH<sub>2</sub>), 36.0 (CH<sub>3</sub>), 29.9 (CH<sub>2</sub>), 29.7 (CH<sub>2</sub>), 28.3 (CH<sub>3</sub>), 20.9 (CH<sub>3</sub>), 13.3 (CH<sub>2</sub>). IR (ATR-FTIR),  $\text{cm}^{-1}$ : 3325 (br w), 2975 (w), 2931 (w), 1681 (s), 1654 (s), 1543 (m), 1453 (w), 1165 (m), 766 (w), 621 (w). HRMS-CI ( $m/z$ ):  $[\text{M} + \text{H}]^+$  calcd for C<sub>31</sub>H<sub>44</sub>N<sub>7</sub>O<sub>6</sub>S<sub>2</sub>, 674.2789; found, 674.2795.  $[\alpha]_{\text{D}}^{20} -33.0$  ( $c$  1.0, CH<sub>2</sub>Cl<sub>2</sub>).

### Synthesis of the amide **15j**:

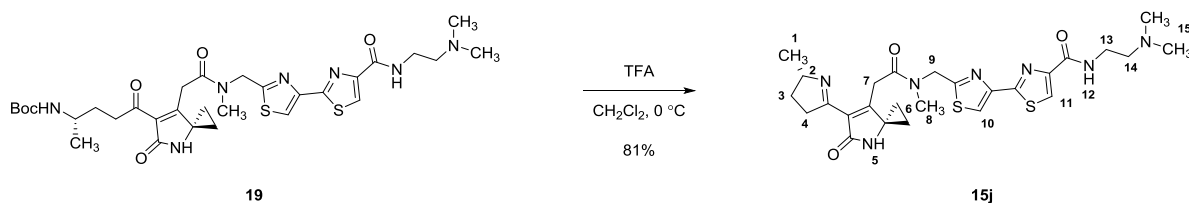

Trifluoroacetic acid (200  $\mu$ L, 2.61 mmol, 176 equiv) was added dropwise via syringe to a solution of the amide **19** (10.0 mg, 14.8  $\mu$ mol, 1 equiv) in dichloromethane (400  $\mu$ L) at 0  $^{\circ}$ C. The reaction mixture was stirred for 1 h at 0  $^{\circ}$ C. The product mixture was concentrated. The concentrated product mixture was diluted with dichloromethane (10 mL). The diluted product mixture was poured into a separatory funnel that had been charged with saturated aqueous sodium bicarbonate solution (5.0 mL) and the layers that formed were separated. The aqueous layer was extracted with dichloromethane (2  $\times$  10 mL). The organic layers were combined and the combined organic layers were dried over sodium sulfate. The dried solution was filtered and the filtrate was concentrated to provide the amide **15j** as a white solid (6.9 mg, 81%).

In DMSO- $d_6$  at room temperature the title compound exists as a mixture (3:1) of amide-bond rotamers. The NMR signals are reported for the major isomer.

$^1\text{H}$  NMR (600 MHz, DMSO- $d_6$ )  $\delta$  8.46 (bs, 1H, H<sub>5</sub>), 8.27 (s, 1H, H<sub>11</sub>), 8.25 (bs, 1H, H<sub>12</sub>), 8.24 (s, 1H, H<sub>10</sub>), 4.84 (d,  $J$  = 15.6 Hz, 1H, H<sub>9</sub>), 4.70 (d,  $J$  = 15.6 Hz, 1H, H<sub>9</sub>), 3.95 – 3.88 (m, 1H, H<sub>2</sub>), 3.71 (d,  $J$  = 15.8 Hz, 1H, H<sub>7</sub>), 3.60 (d,  $J$  = 15.8 Hz, 1H, H<sub>7</sub>), 3.39 (app q,  $J$  = 6.4 Hz, 2H, H<sub>13</sub>), 3.17 (s, 3H, H<sub>8</sub>), 3.01 – 2.92 (m, 1H, H<sub>4</sub>), 2.81 – 2.69 (m, 1H, H<sub>4</sub>), 2.41 (t,  $J$  = 6.6 Hz, 2H, H<sub>14</sub>), 2.18 (s, 6H, H<sub>15</sub>), 2.02 – 1.92 (m, 1H, H<sub>3</sub>), 1.51 – 1.43 (m, 2H, H<sub>6</sub>), 1.39 – 1.30 (m, 2H, H<sub>6</sub>), 1.28 – 1.21 (m, 1H, H<sub>3</sub>), 1.07 (d,  $J$  = 6.7 Hz, 3H, H<sub>1</sub>).  $^{13}\text{C}$  NMR (151 MHz, DMSO- $d_6$ )  $\delta$  170.3 (C), 169.0 (C), 168.9 (C), 166.8 (C), 161.8 (C), 160.2 (C), 159.3 (C), 150.8 (C), 147.1 (C), 127.2 (C), 124.1 (CH), 118.7 (CH), 66.9 (CH), 58.1 (CH<sub>2</sub>), 48.8 (CH<sub>2</sub>), 45.4 (C), 45.2 (CH<sub>3</sub>), 36.7 (CH<sub>2</sub>), 36.1 (CH<sub>3</sub>), 29.7 (CH<sub>2</sub>), 29.6 (CH<sub>2</sub>), 22.0 (CH<sub>3</sub>), 12.2 (CH<sub>2</sub>), 12.0 (CH<sub>2</sub>). HRMS-CI ( $m/z$ ):  $[\text{M} + \text{H}]^+$  calcd for C<sub>26</sub>H<sub>34</sub>N<sub>7</sub>O<sub>3</sub>S<sub>2</sub>, 556.2159; found, 556.2167.  $[\alpha]_{\text{D}}^{20}$   $-38.0$  ( $c$  1.0, CH<sub>2</sub>Cl<sub>2</sub>).

# Catalog of Nuclear Magnetic Resonance Spectra

$^1\text{H}$  NMR, 500 MHz,  $\text{CD}_2\text{Cl}_2$

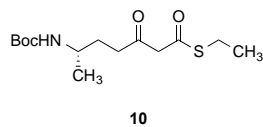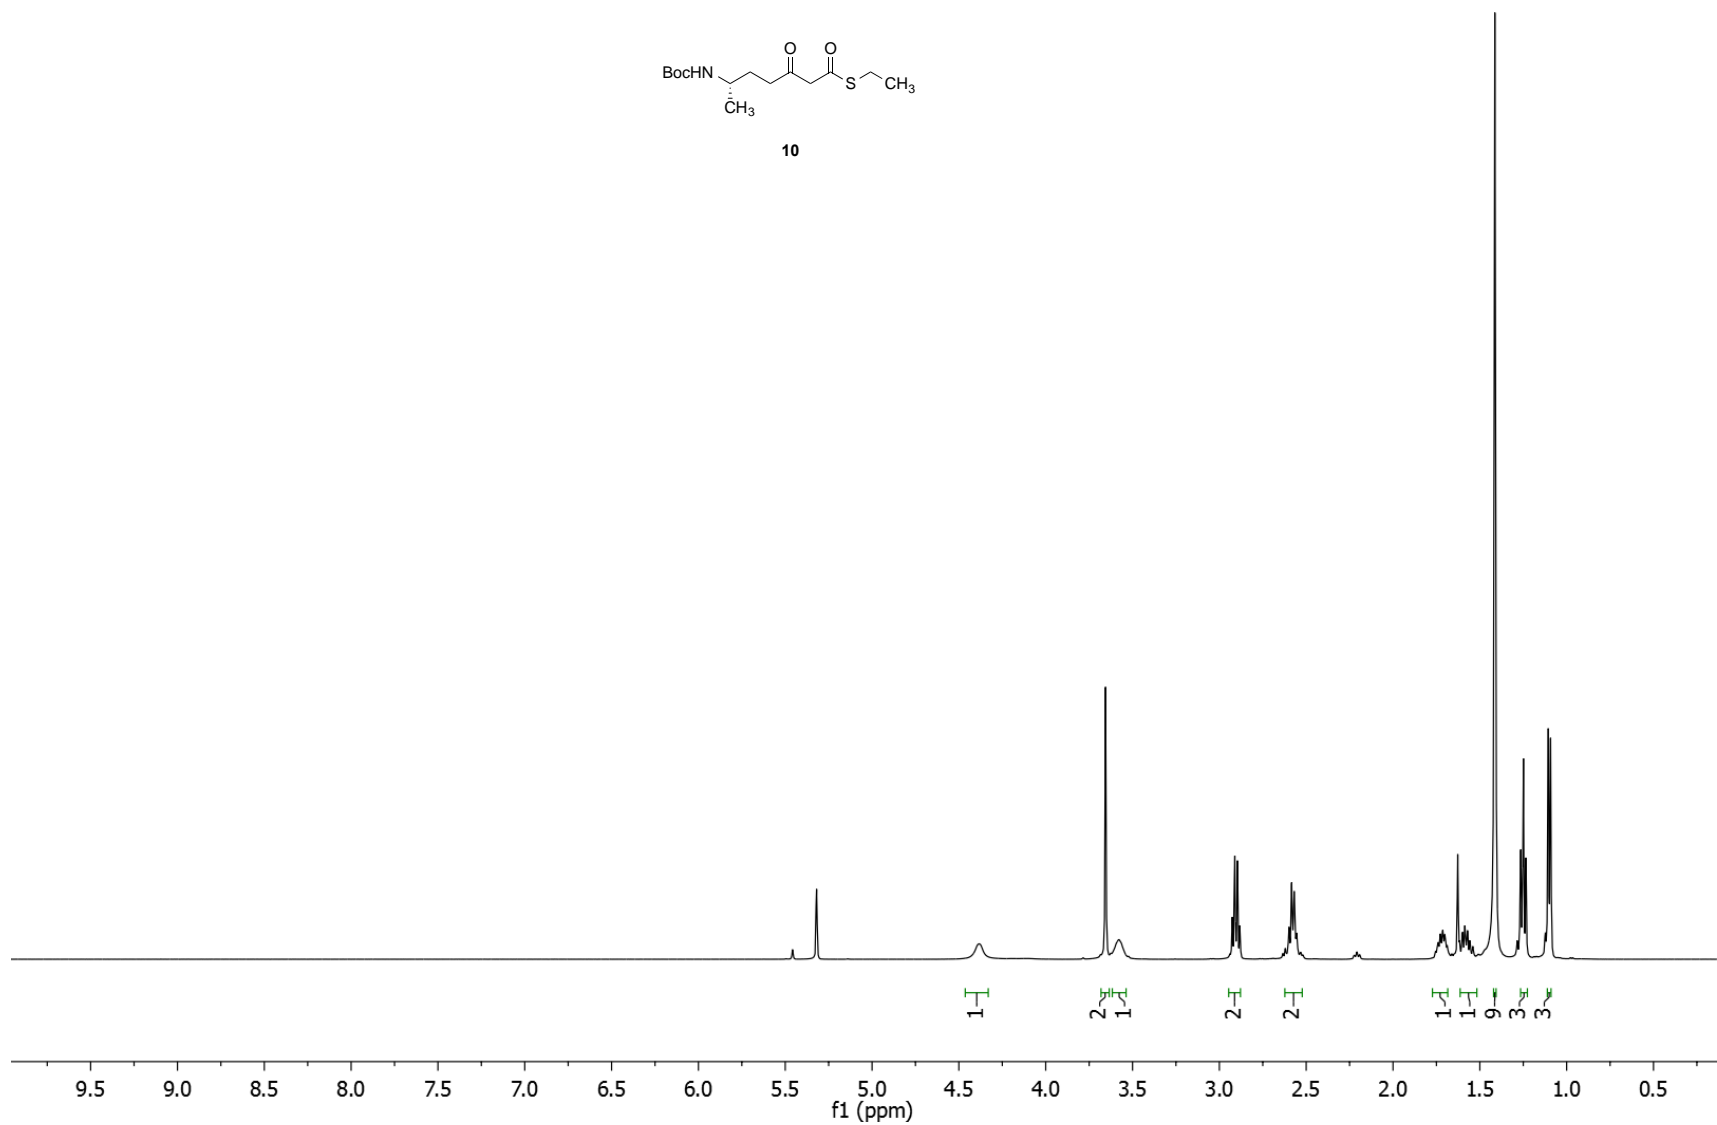

$^{13}\text{C}$  NMR, 125 MHz,  $\text{CD}_2\text{Cl}_2$

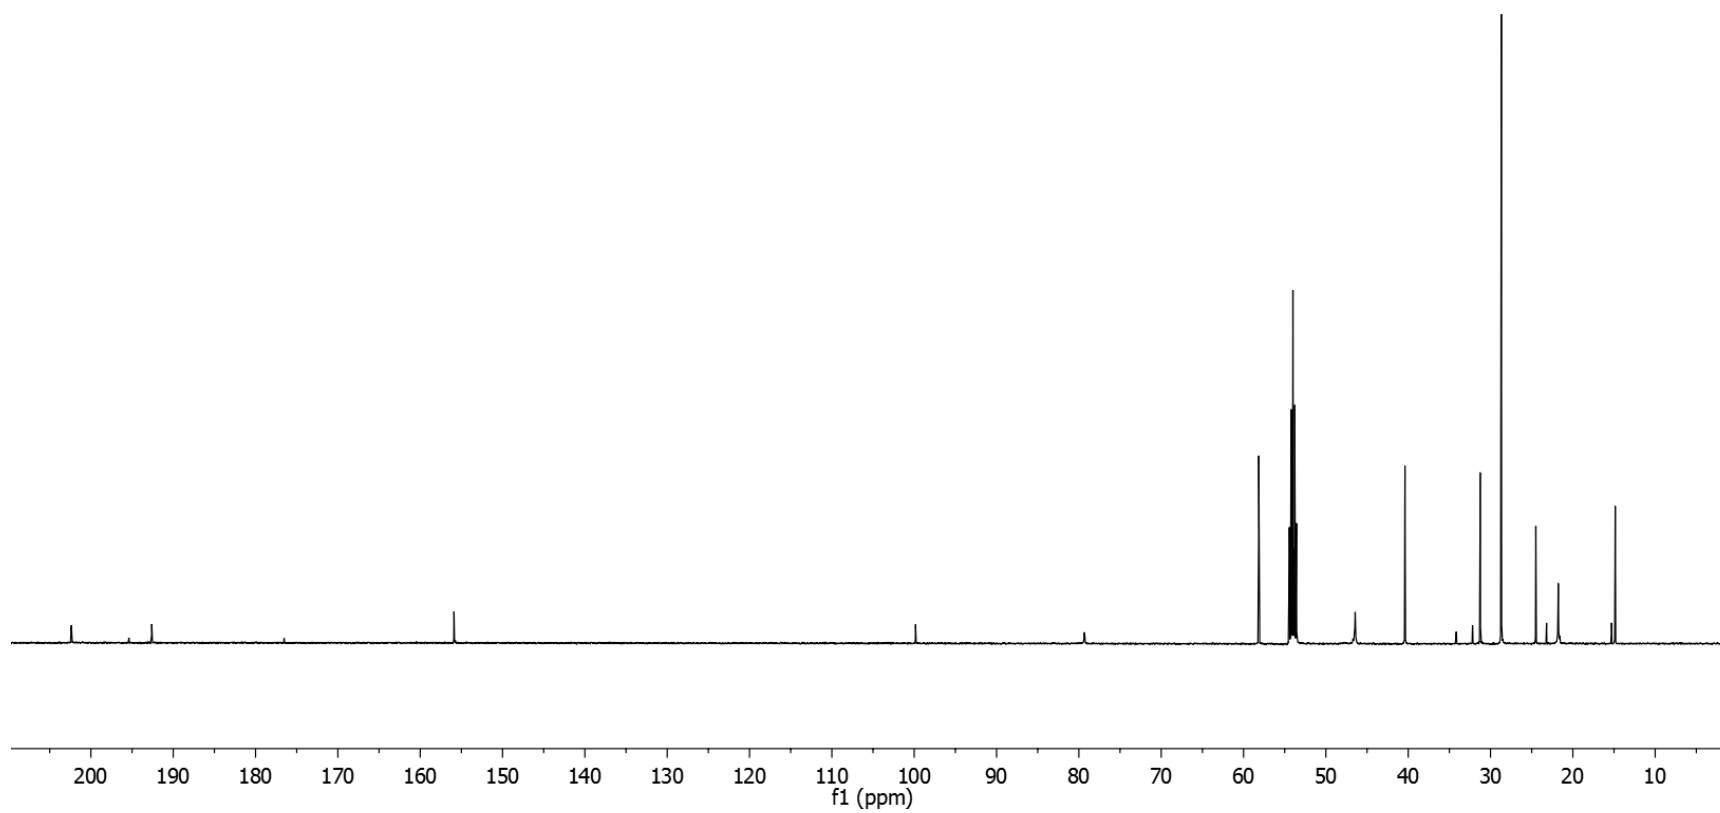

<sup>1</sup>H NMR, 500 MHz, DMSO-*d*<sub>6</sub>

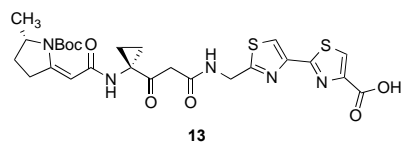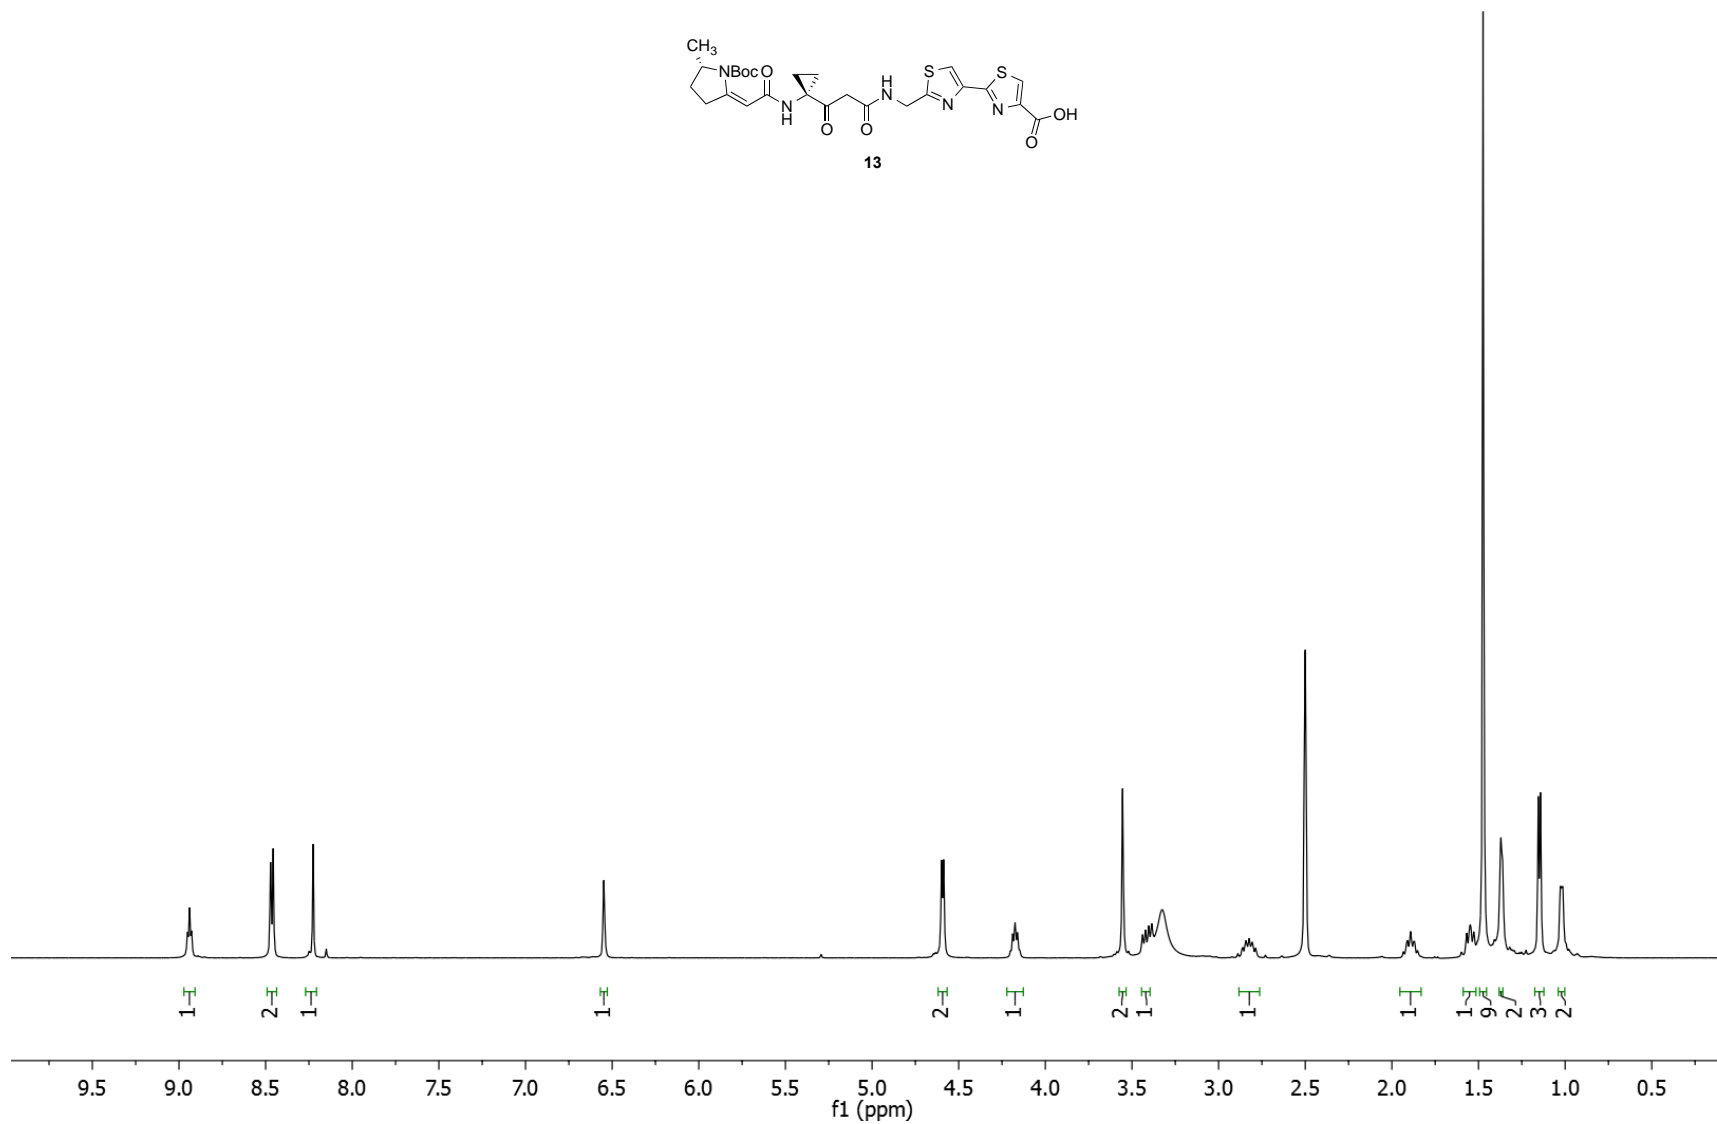

<sup>13</sup>C NMR, 125 MHz, DMSO-

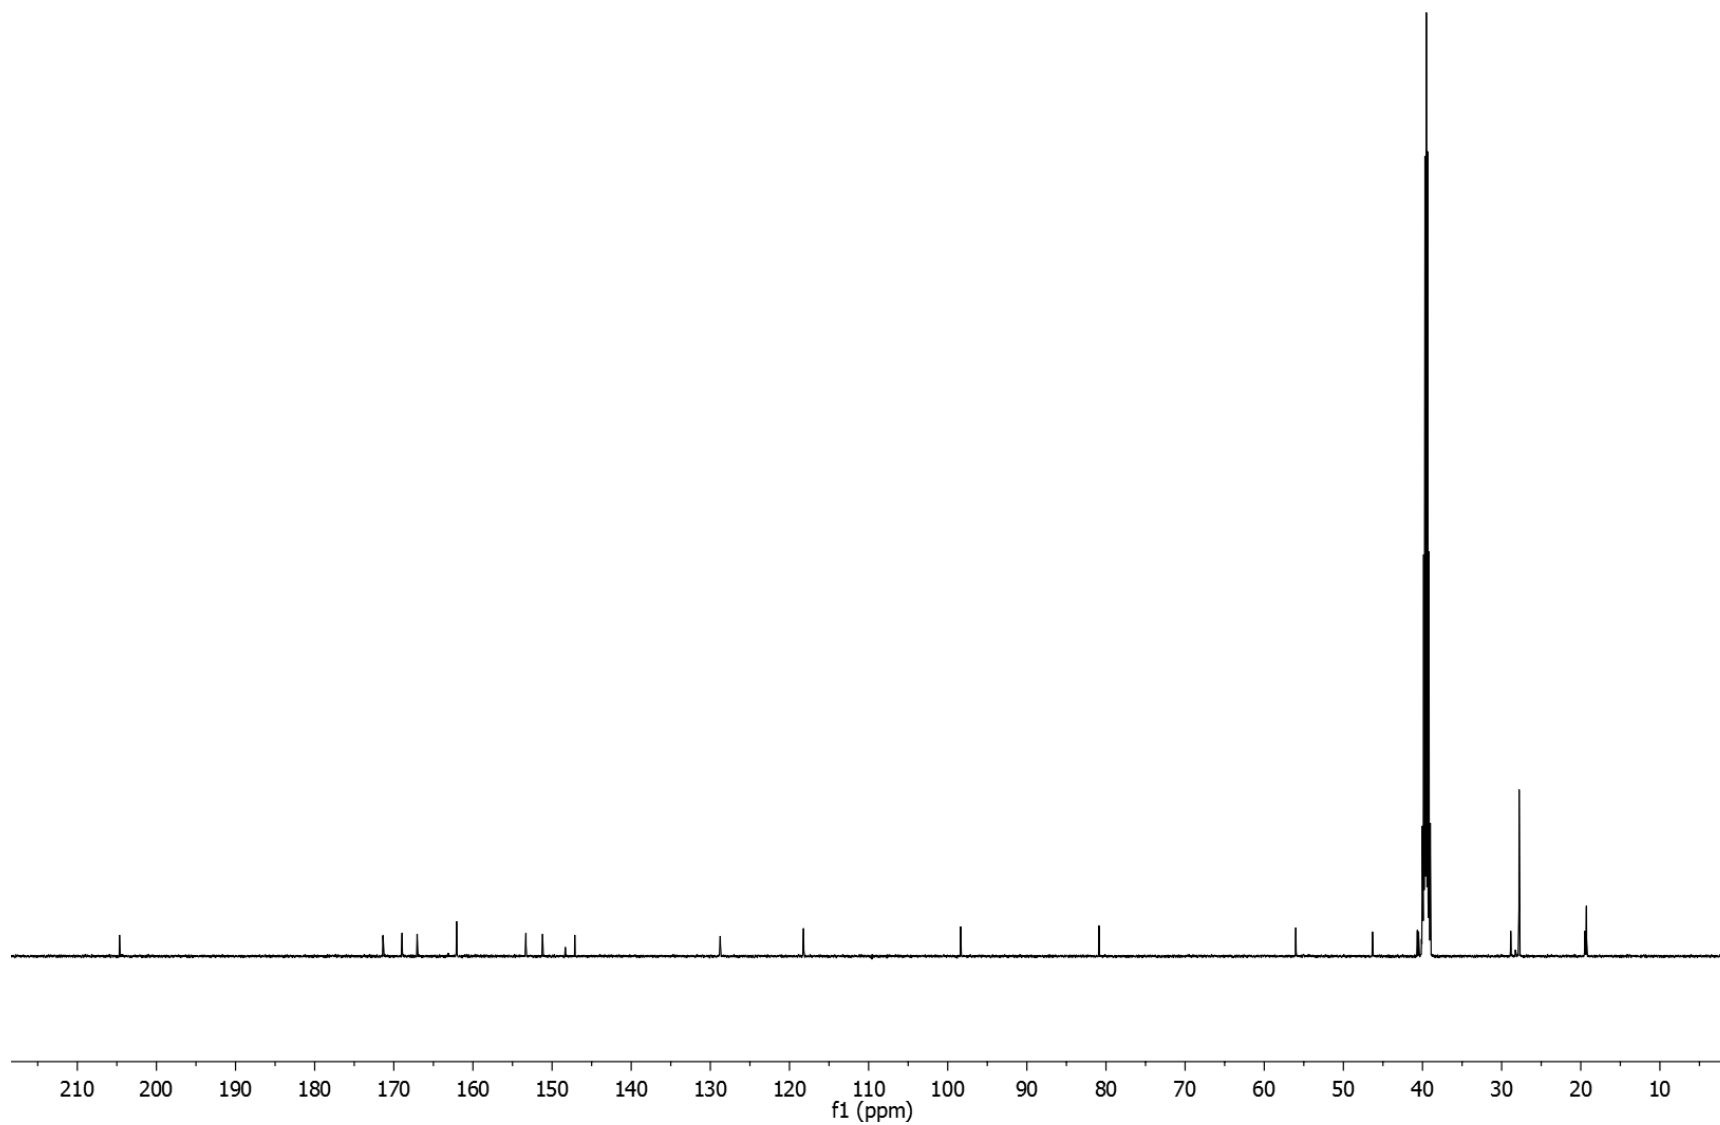



<sup>1</sup>H NMR, 500 MHz, DMSO-*d*<sub>6</sub>

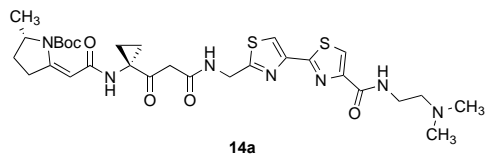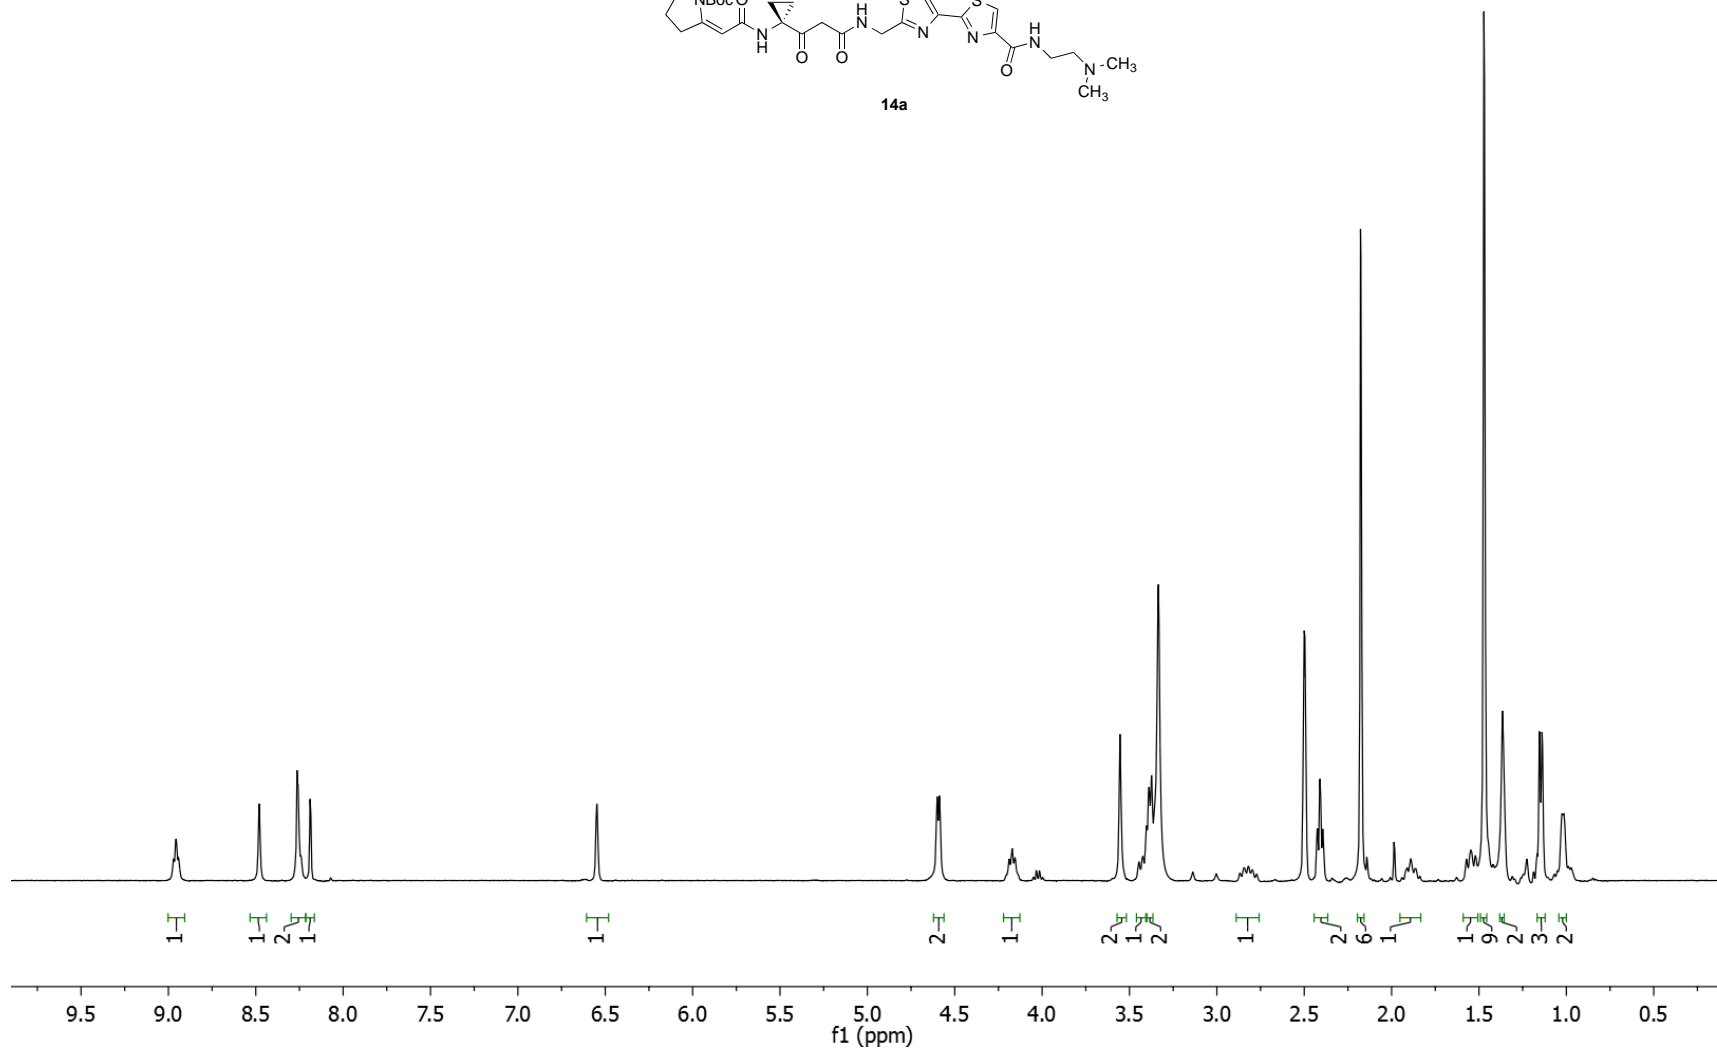

$^{13}\text{C}$  NMR, 125 MHz,  $\text{DMSO-}d_6$

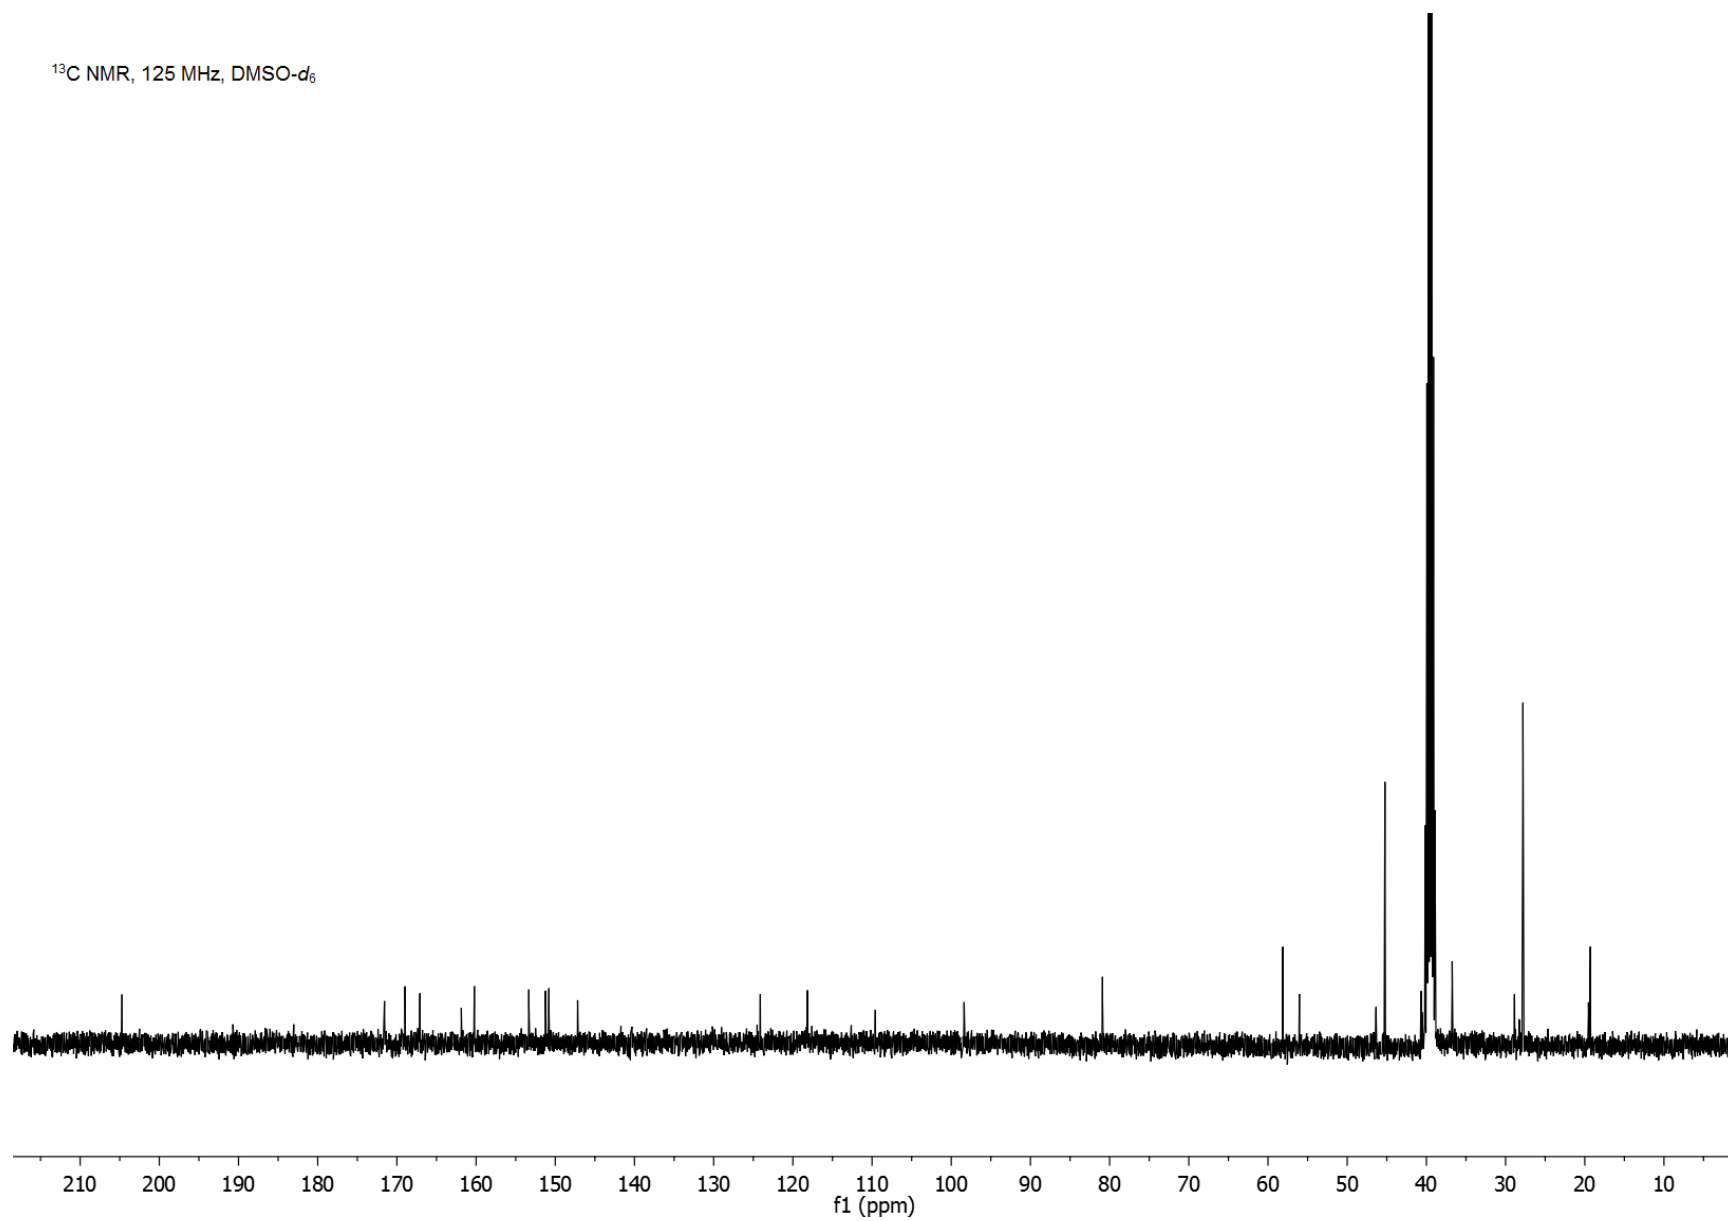

$^1\text{H}$  NMR, 500 MHz,  $\text{DMSO-}d_6$

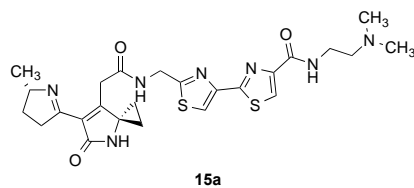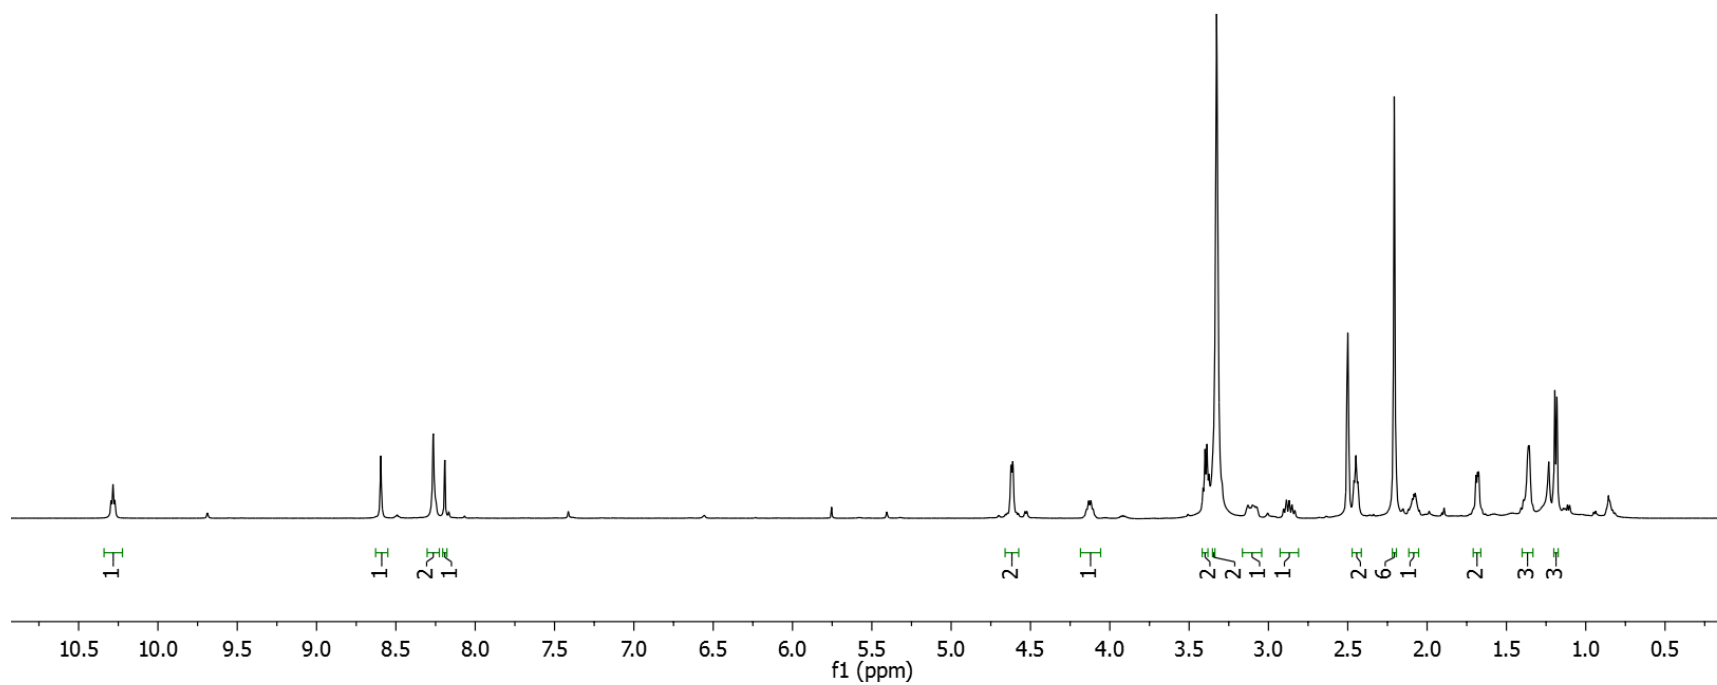

$^{13}\text{C}$  NMR, 125 MHz,  $\text{DMSO-}d_6$

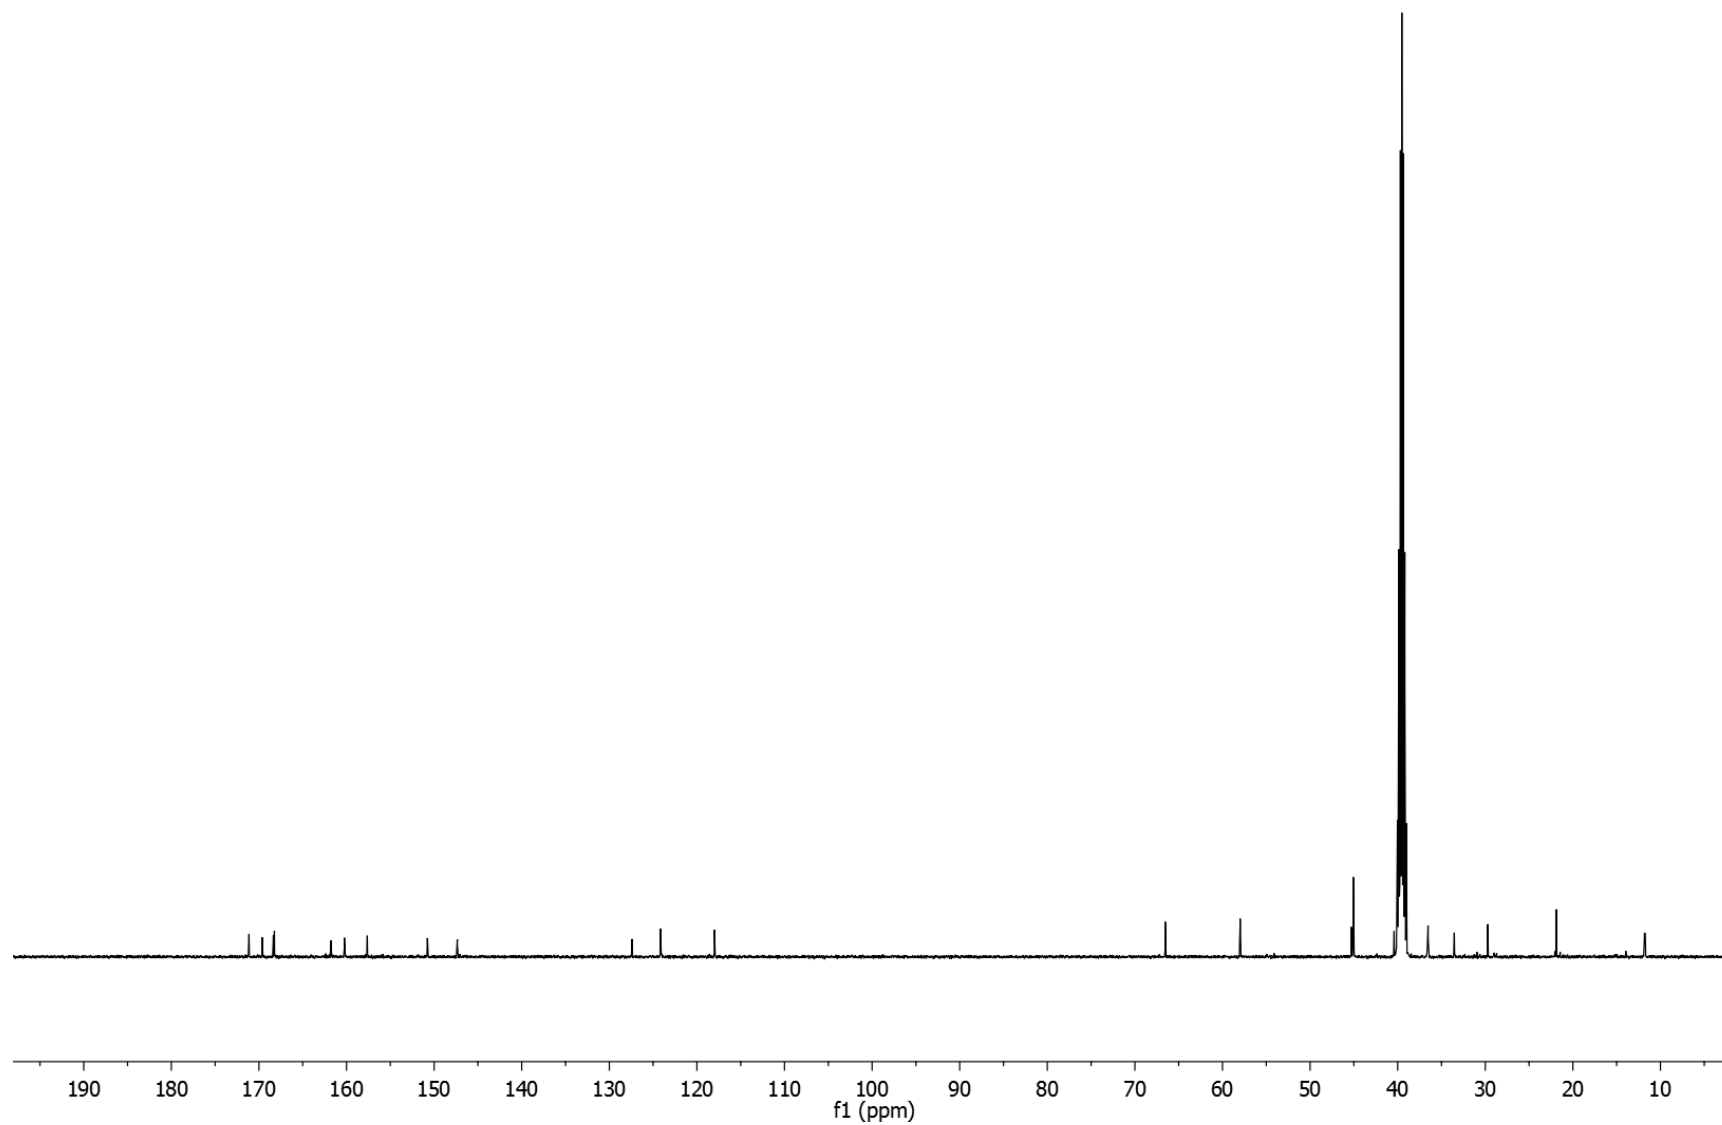

$^1\text{H}$  NMR, 600 MHz,  $\text{DMSO-}d_6$

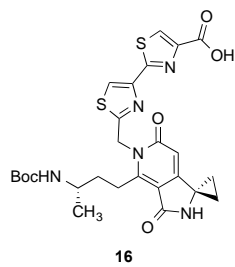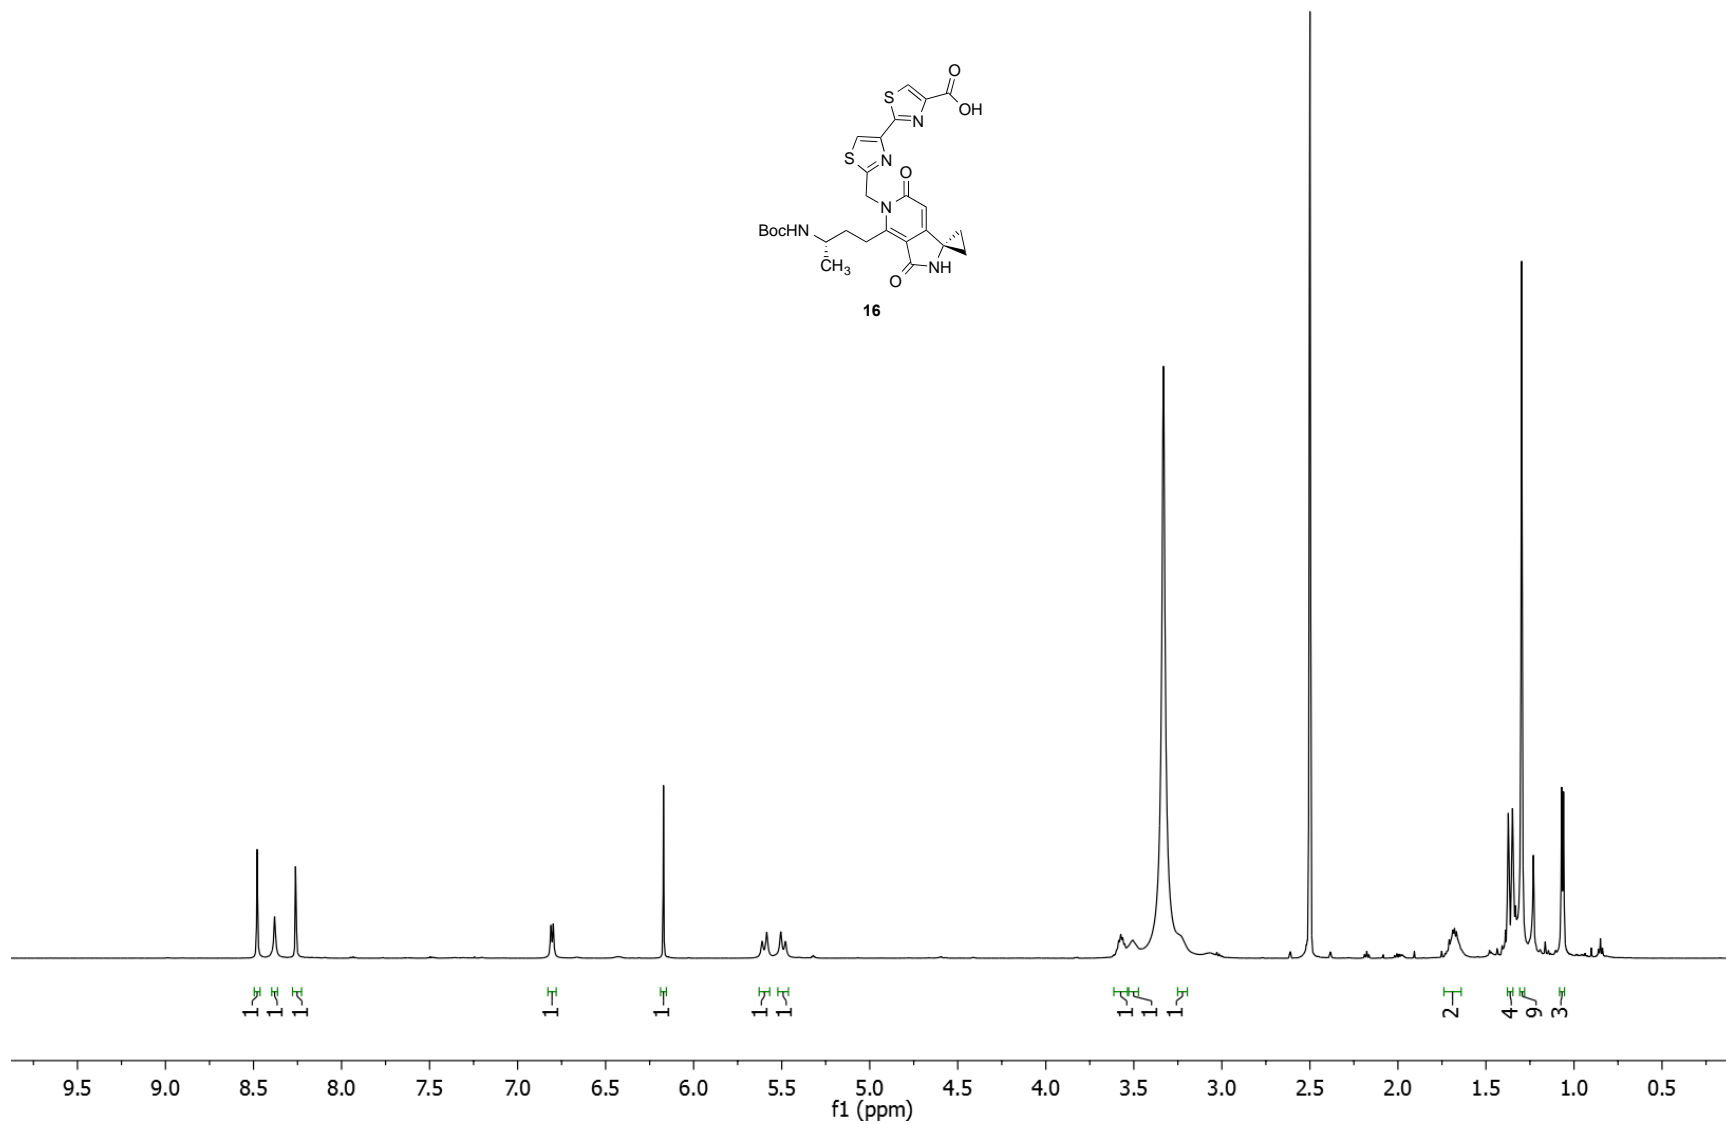

$^{13}\text{C}$  NMR, 150 MHz,  $\text{DMSO-}d_6$

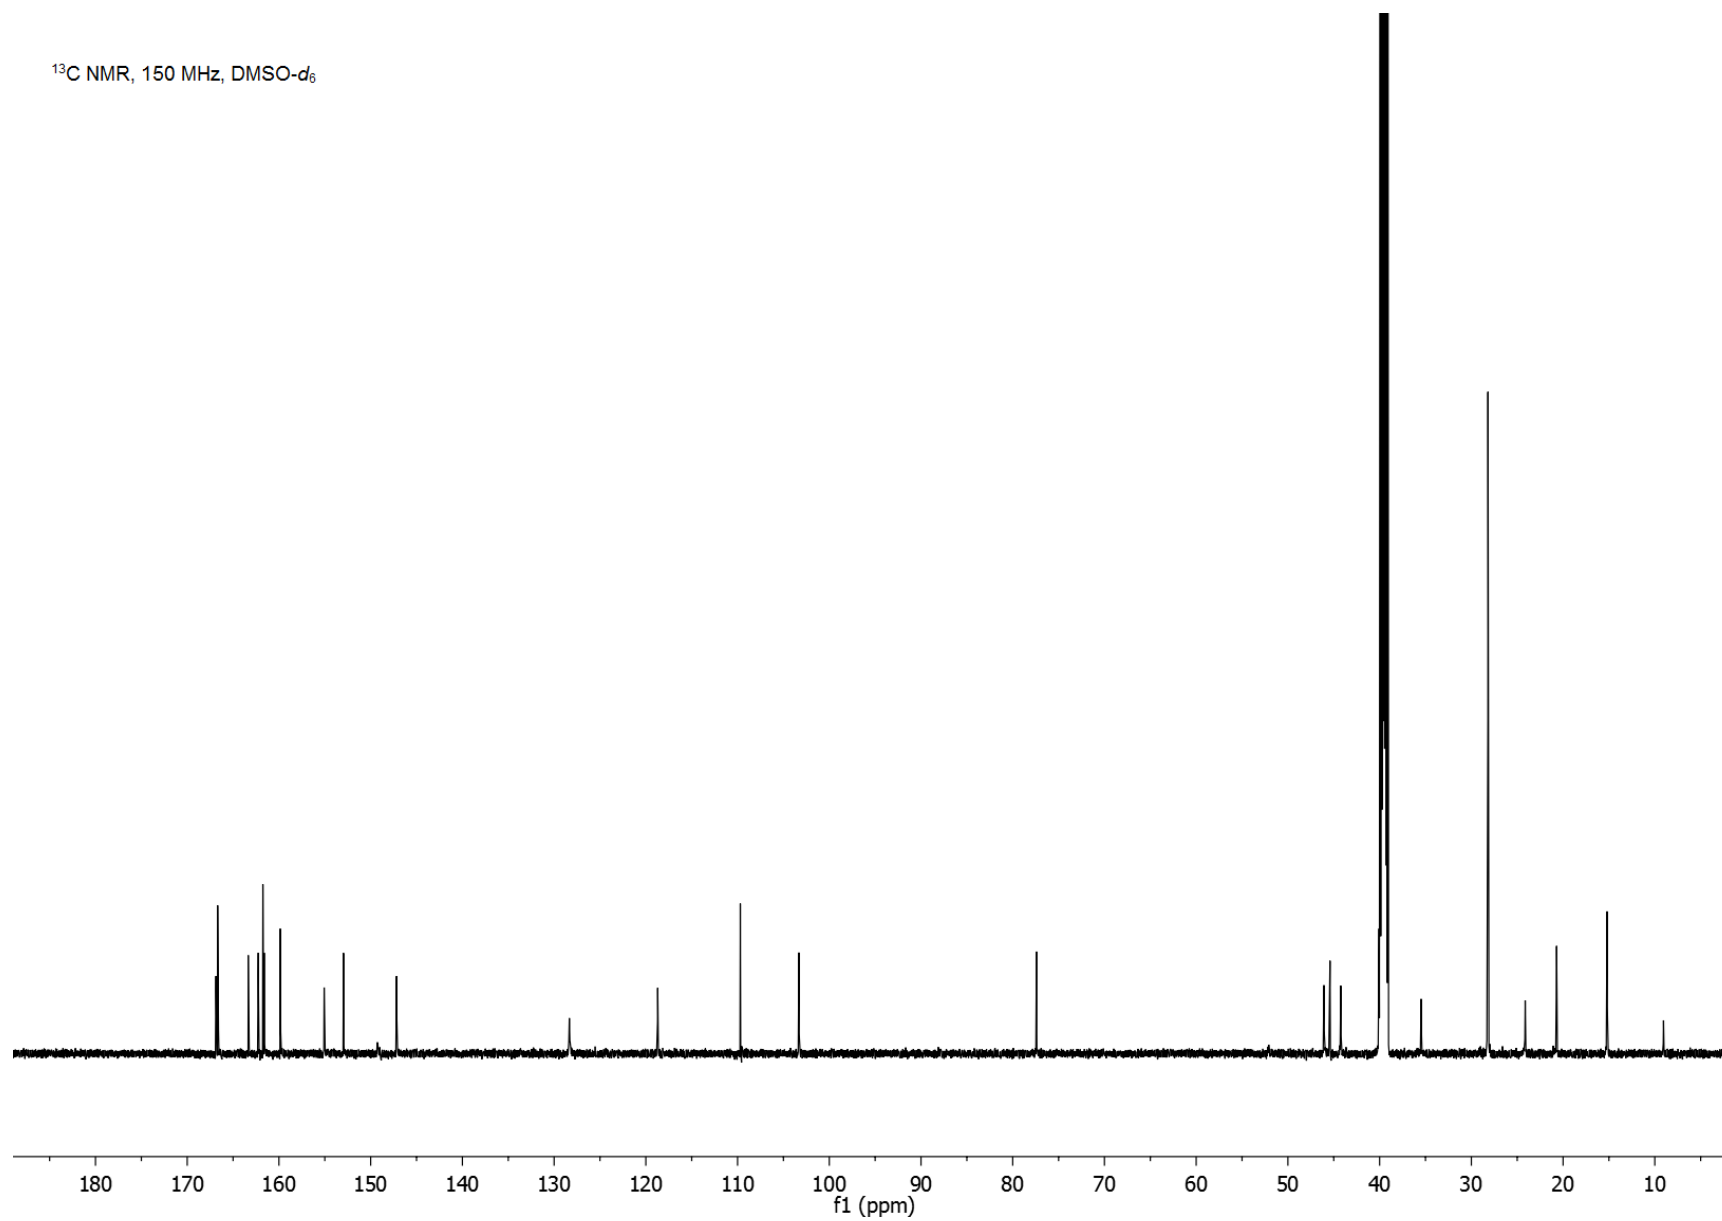

$^1\text{H}$  NMR, 500 MHz,  $\text{CD}_2\text{Cl}_2$

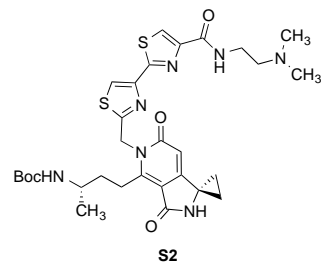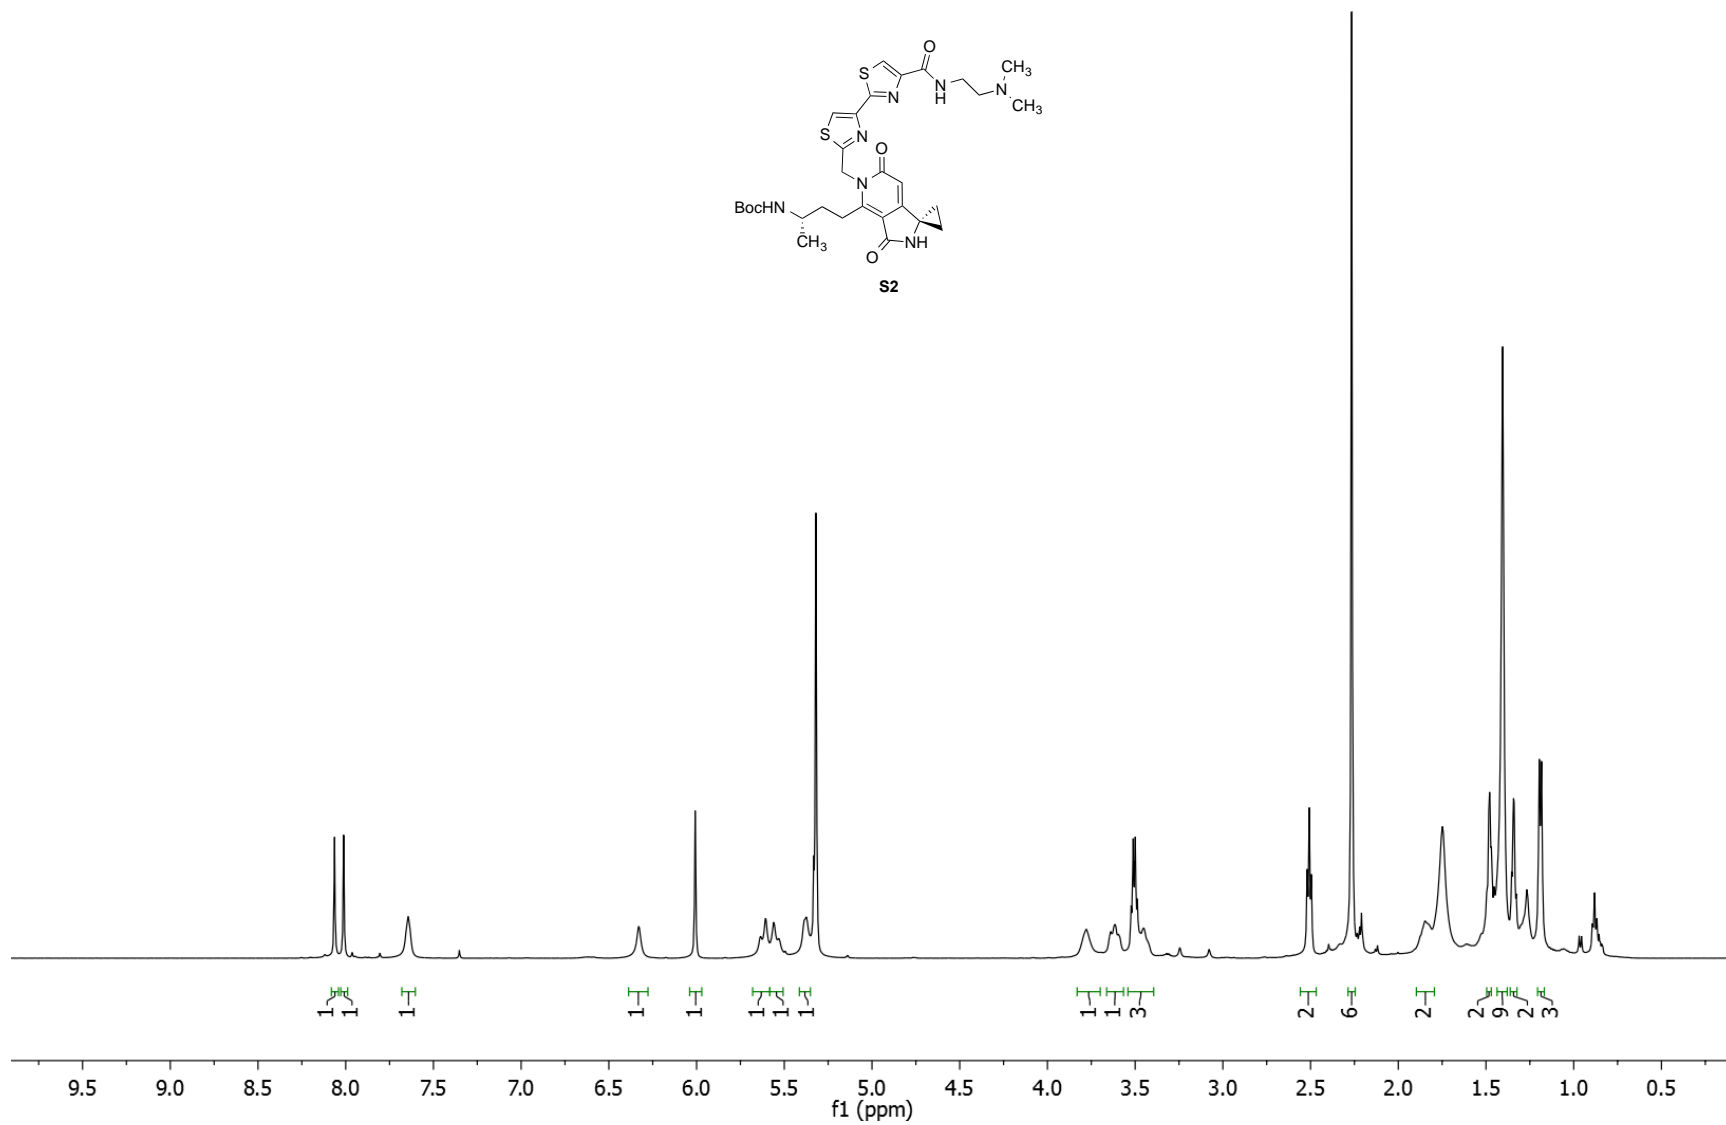

$^{13}\text{C}$  NMR, 125 MHz,  $\text{CD}_2\text{Cl}_2$

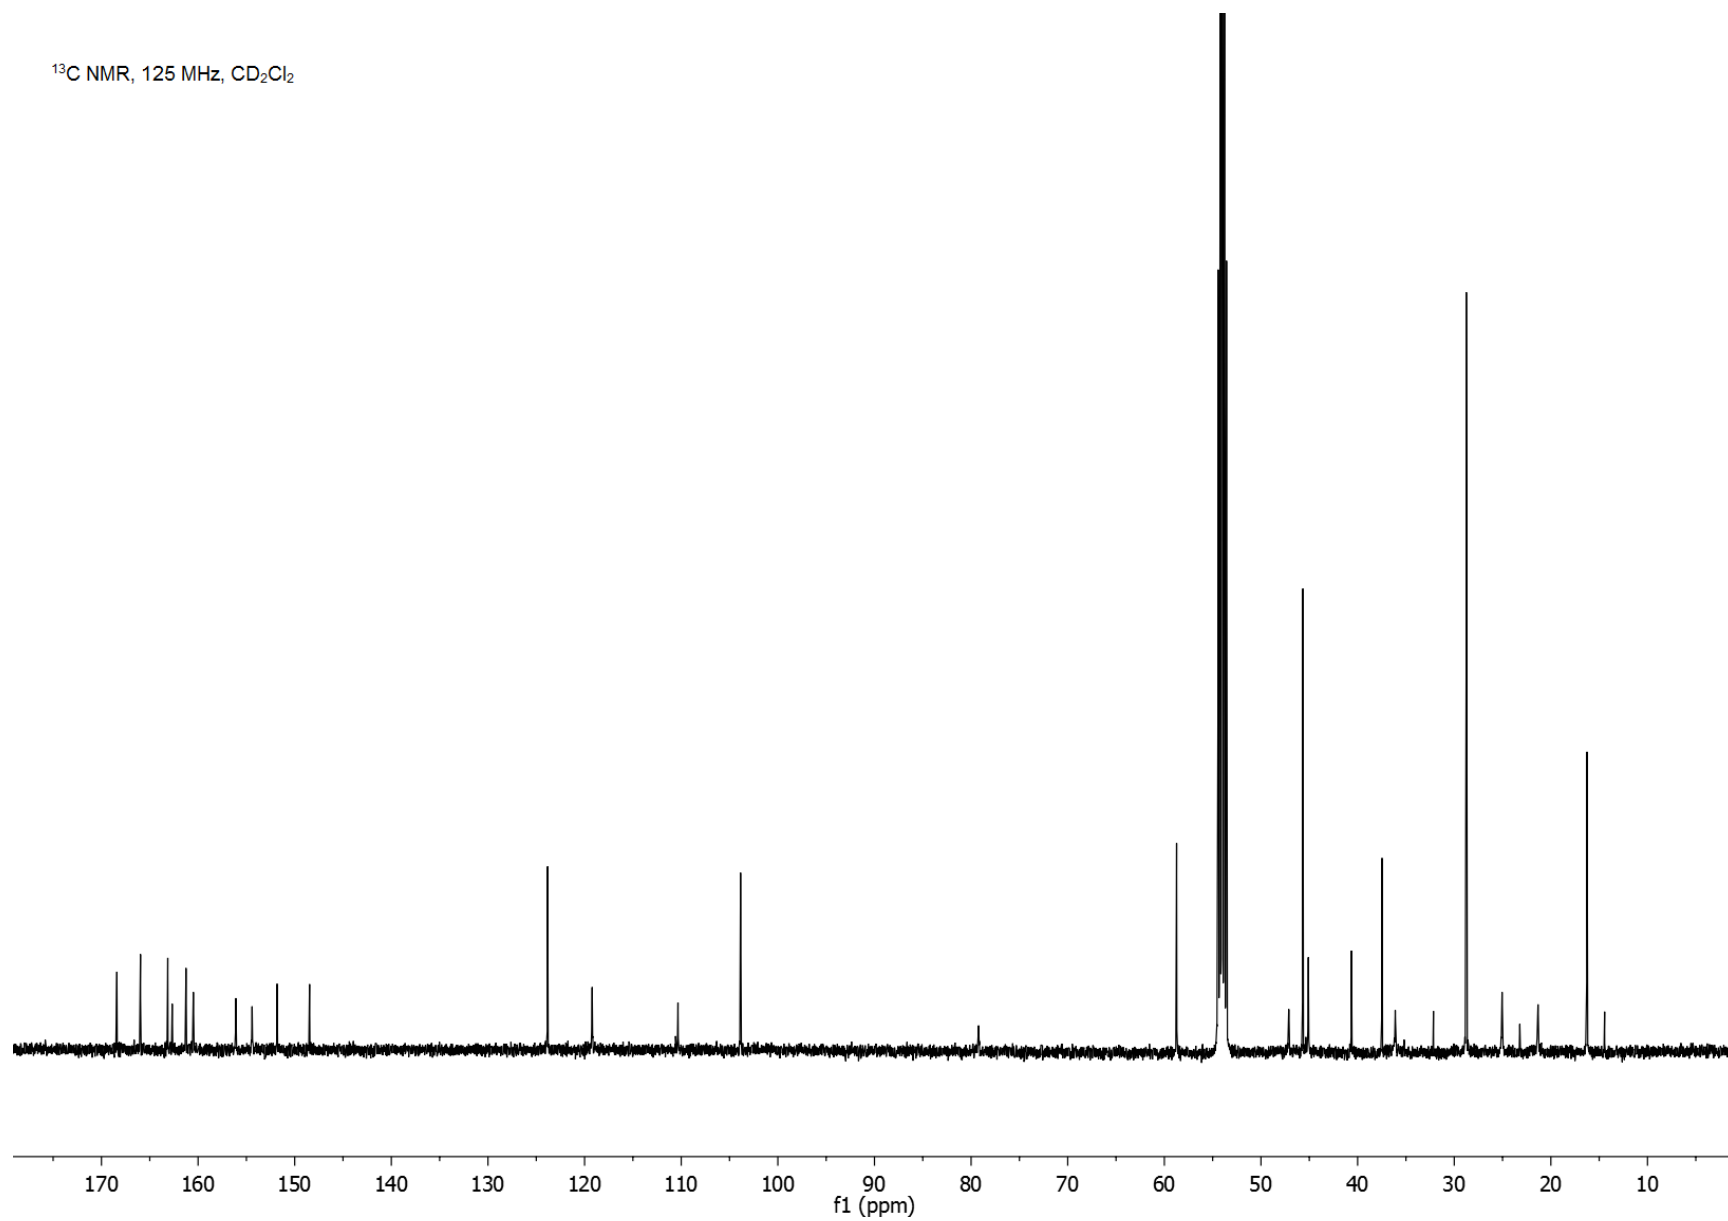



$^1\text{H}$  NMR, 500 MHz,  $\text{CD}_3\text{OD}$

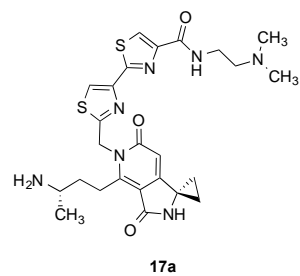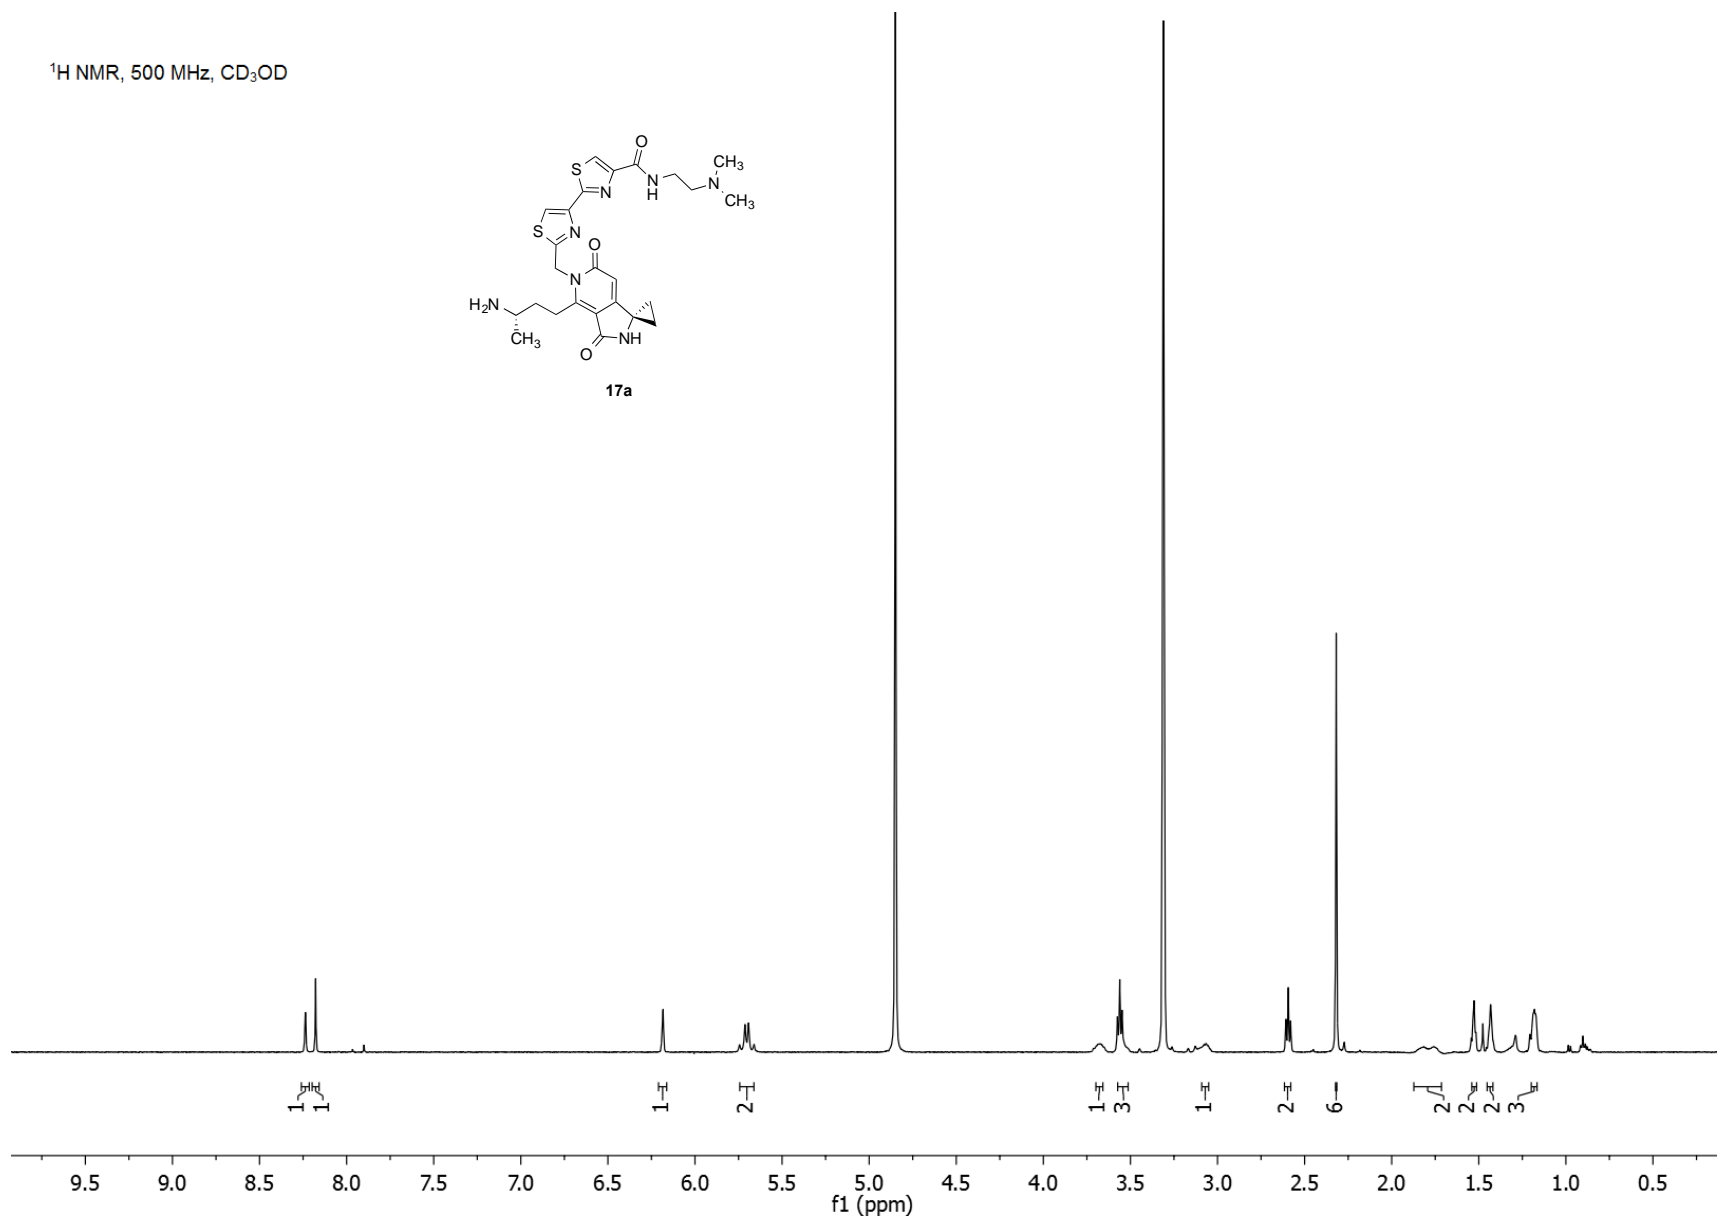

$^{13}\text{C}$  NMR, 150 MHz,  $\text{CD}_3\text{OD}$

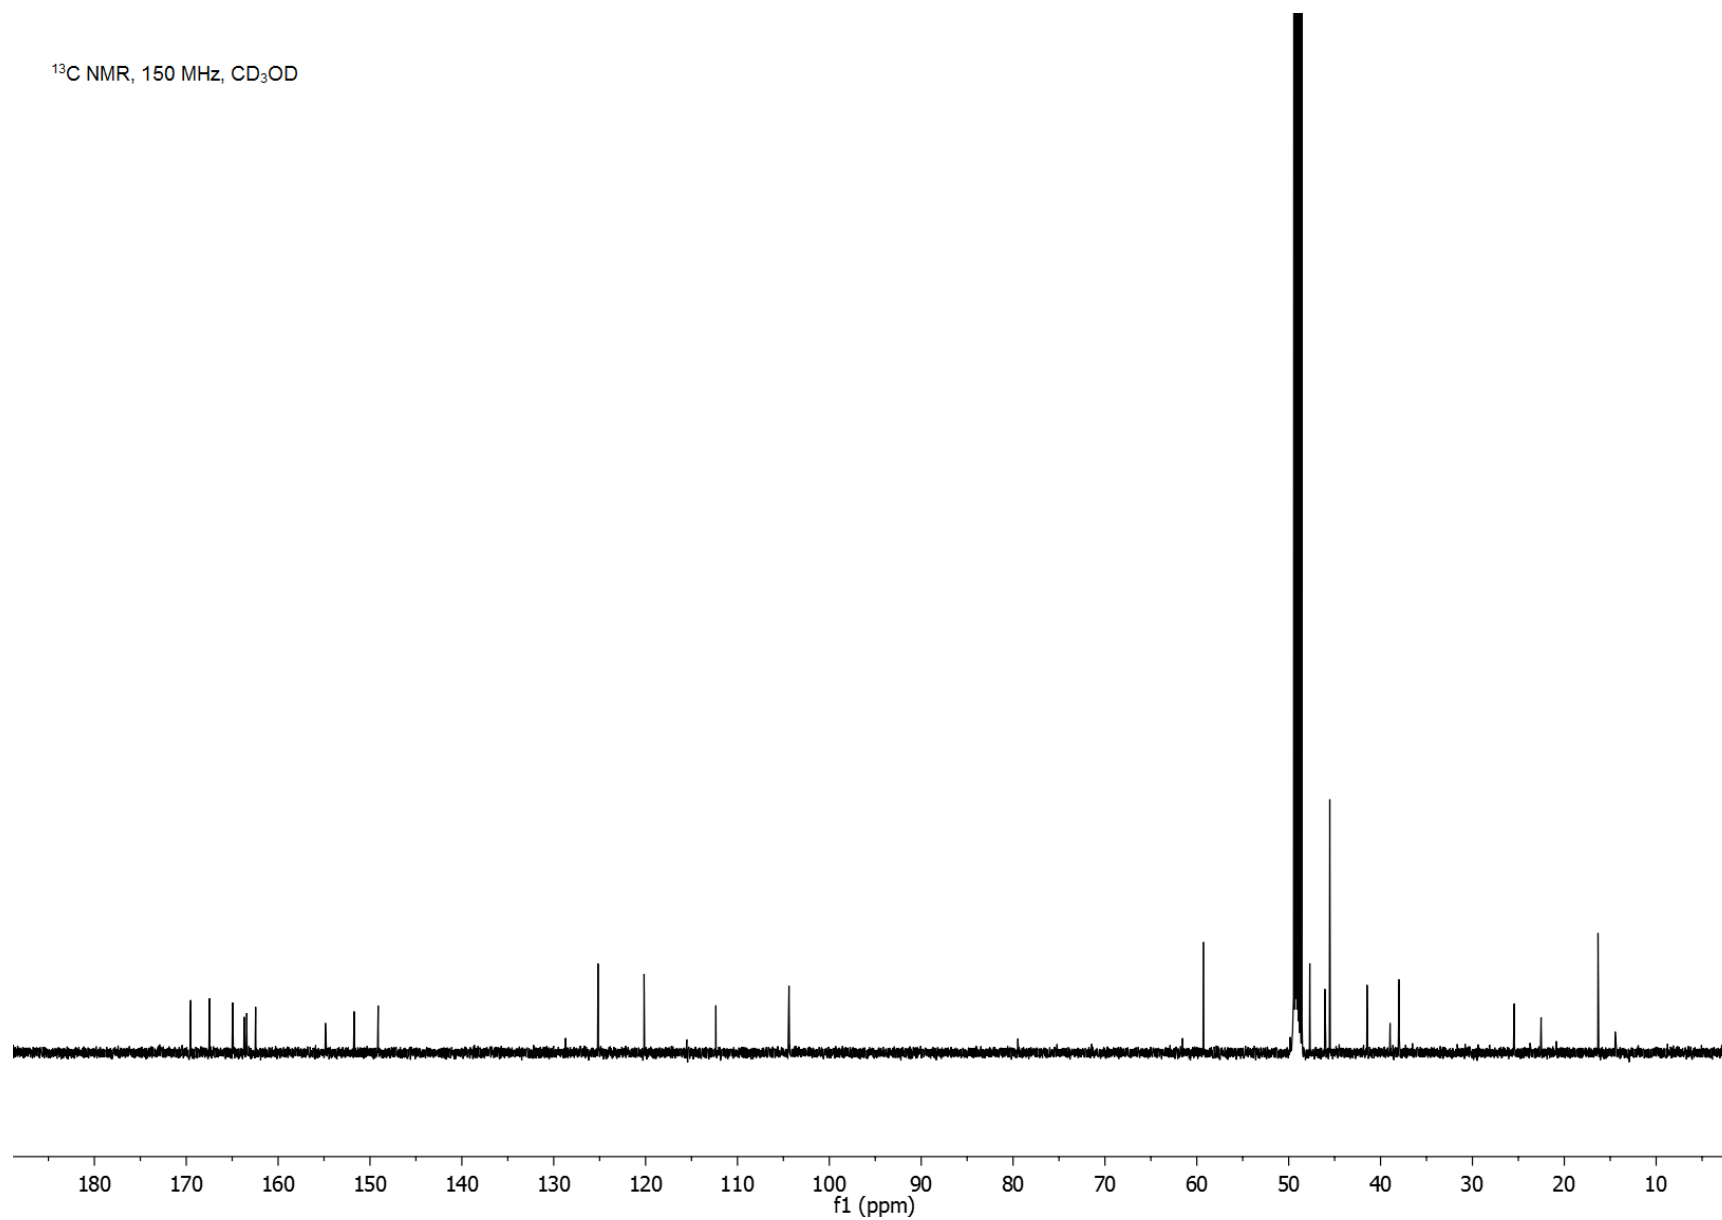

$^1\text{H}$  NMR, 500 MHz,  $\text{CD}_2\text{Cl}_2$

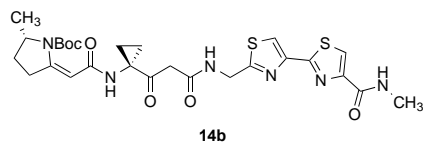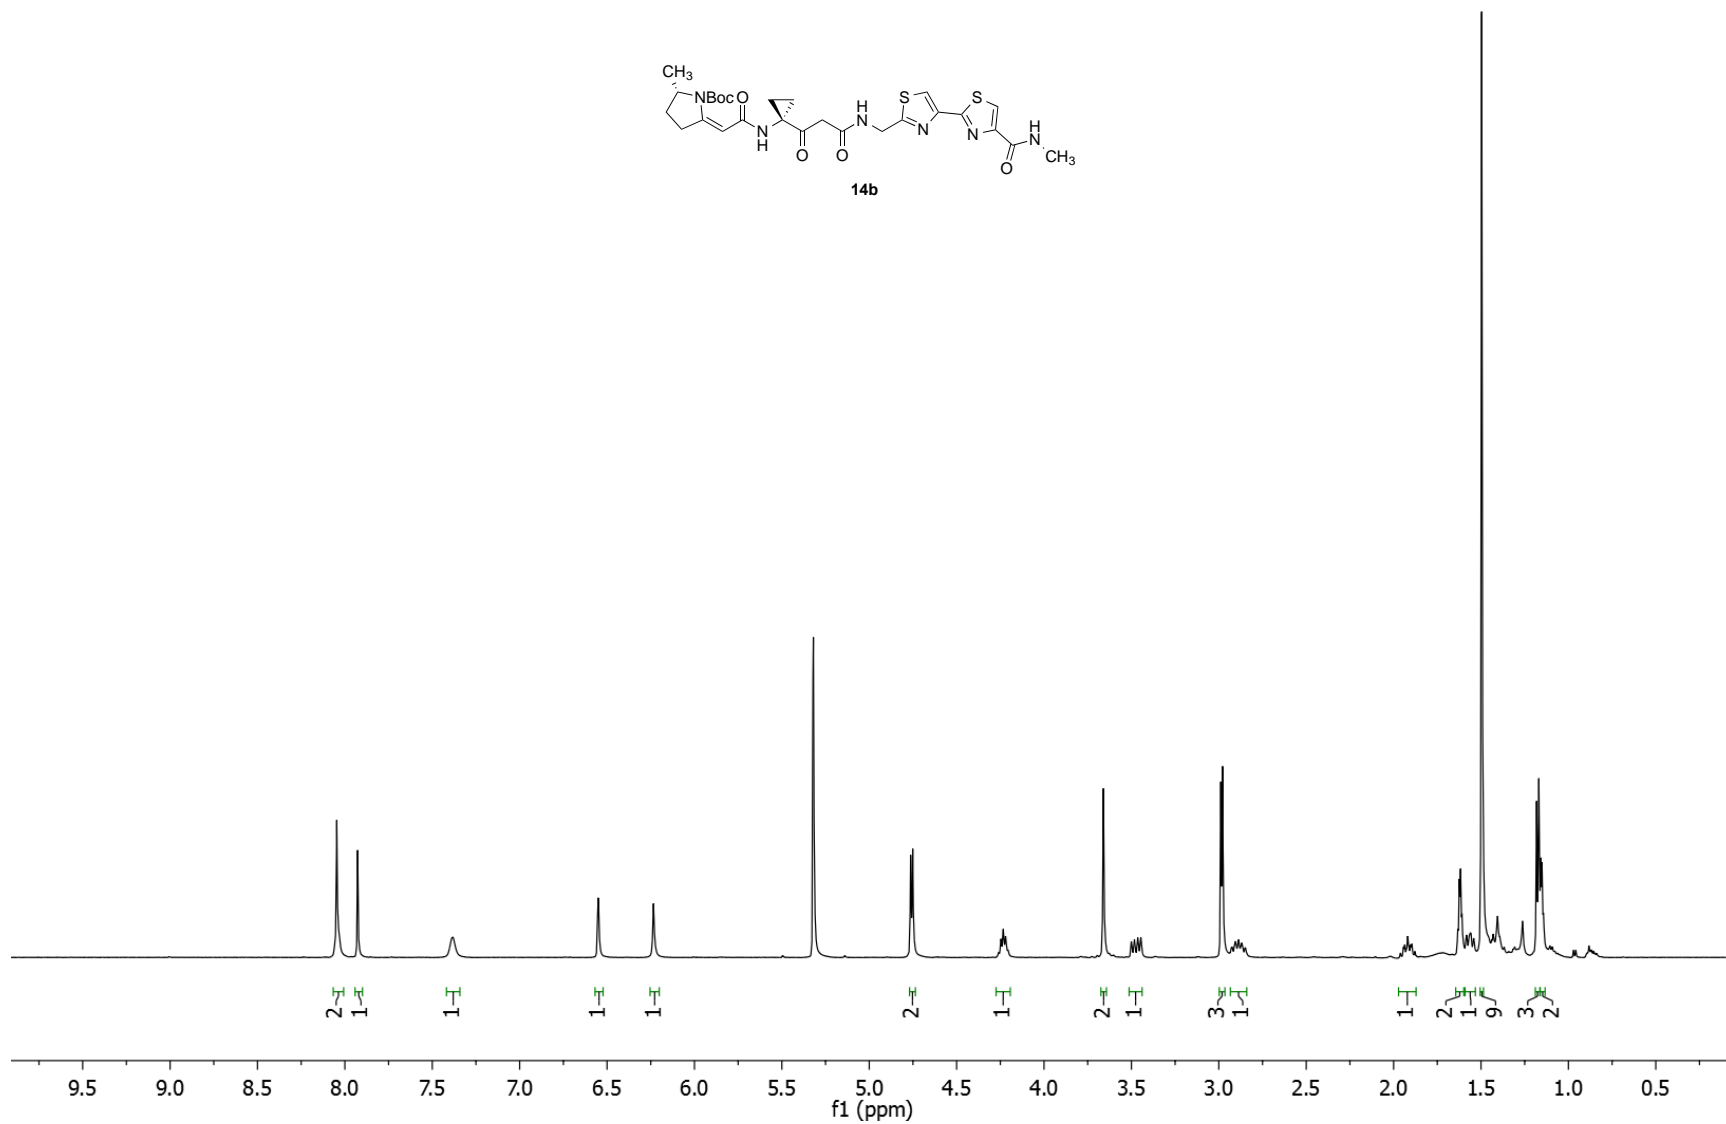

$^{13}\text{C}$  NMR, 125 MHz,  $\text{CD}_2\text{Cl}_2$

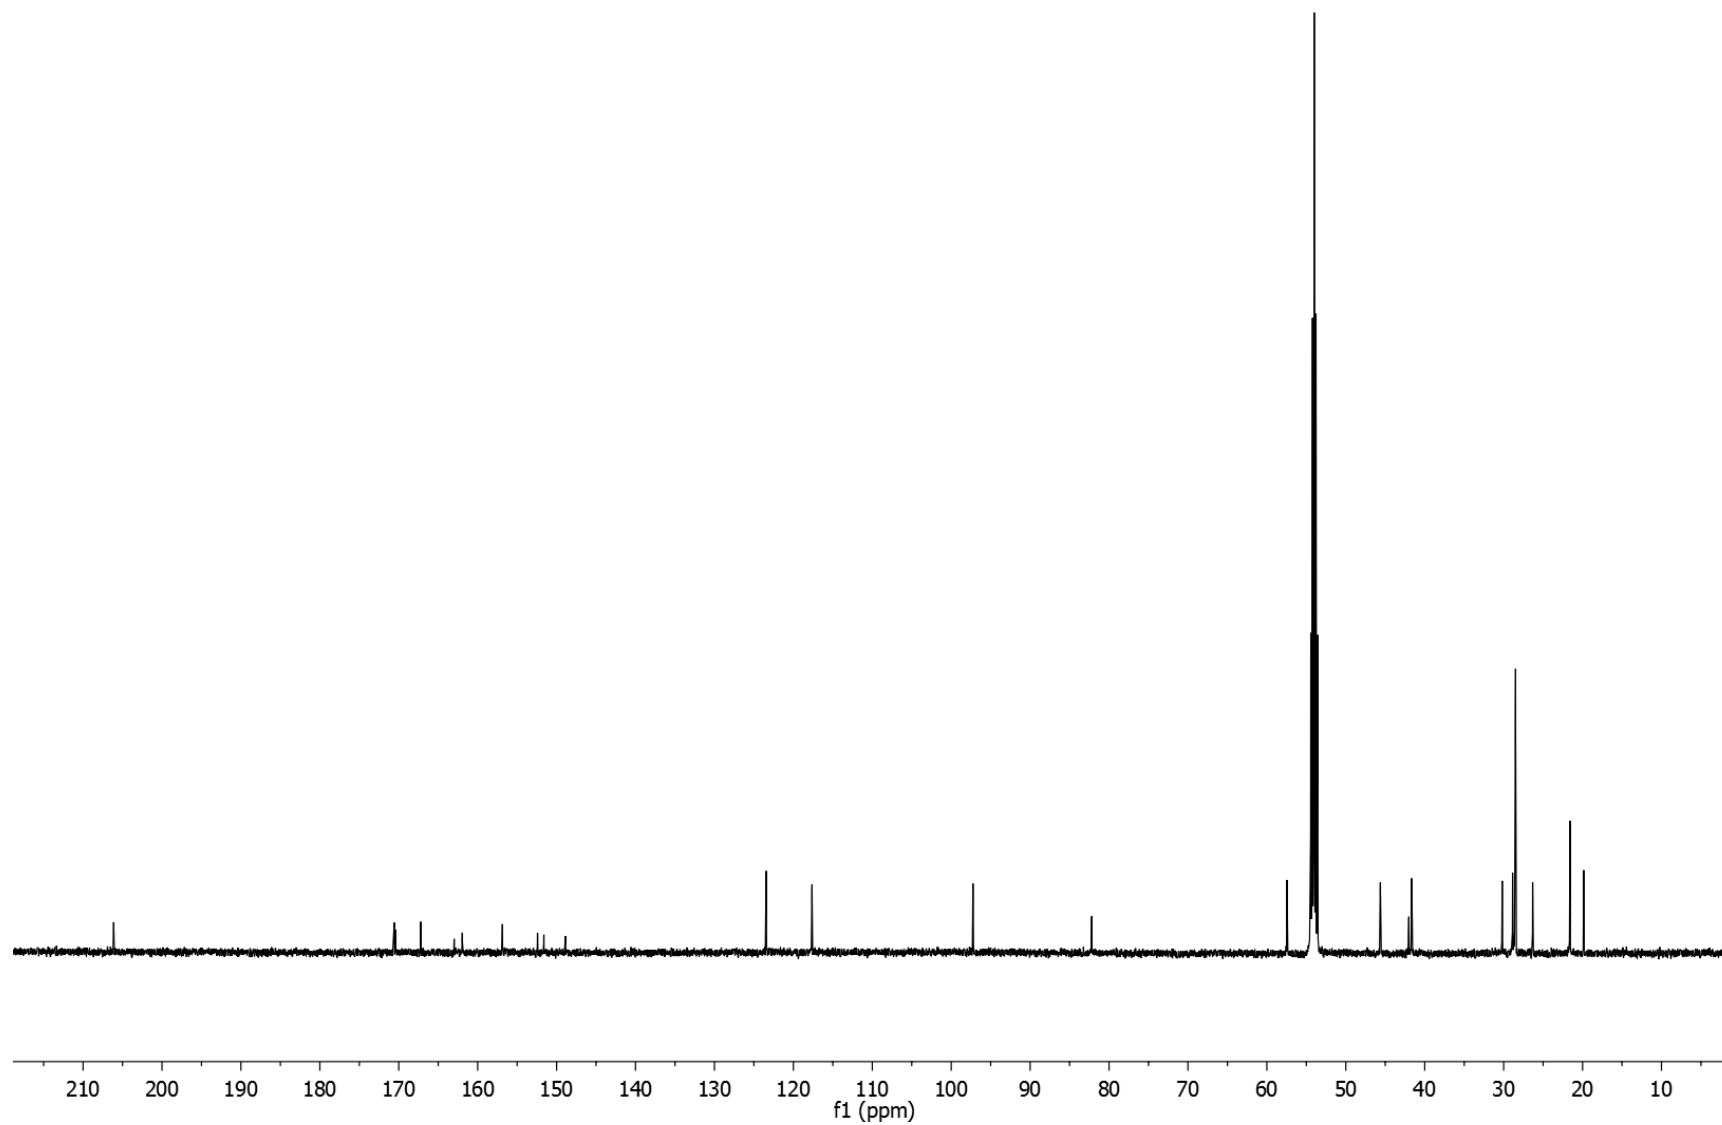

$^1\text{H}$  NMR, 600 MHz,  $\text{DMSO-}d_6$

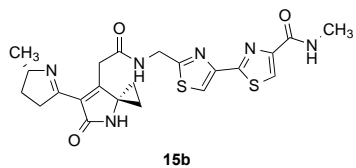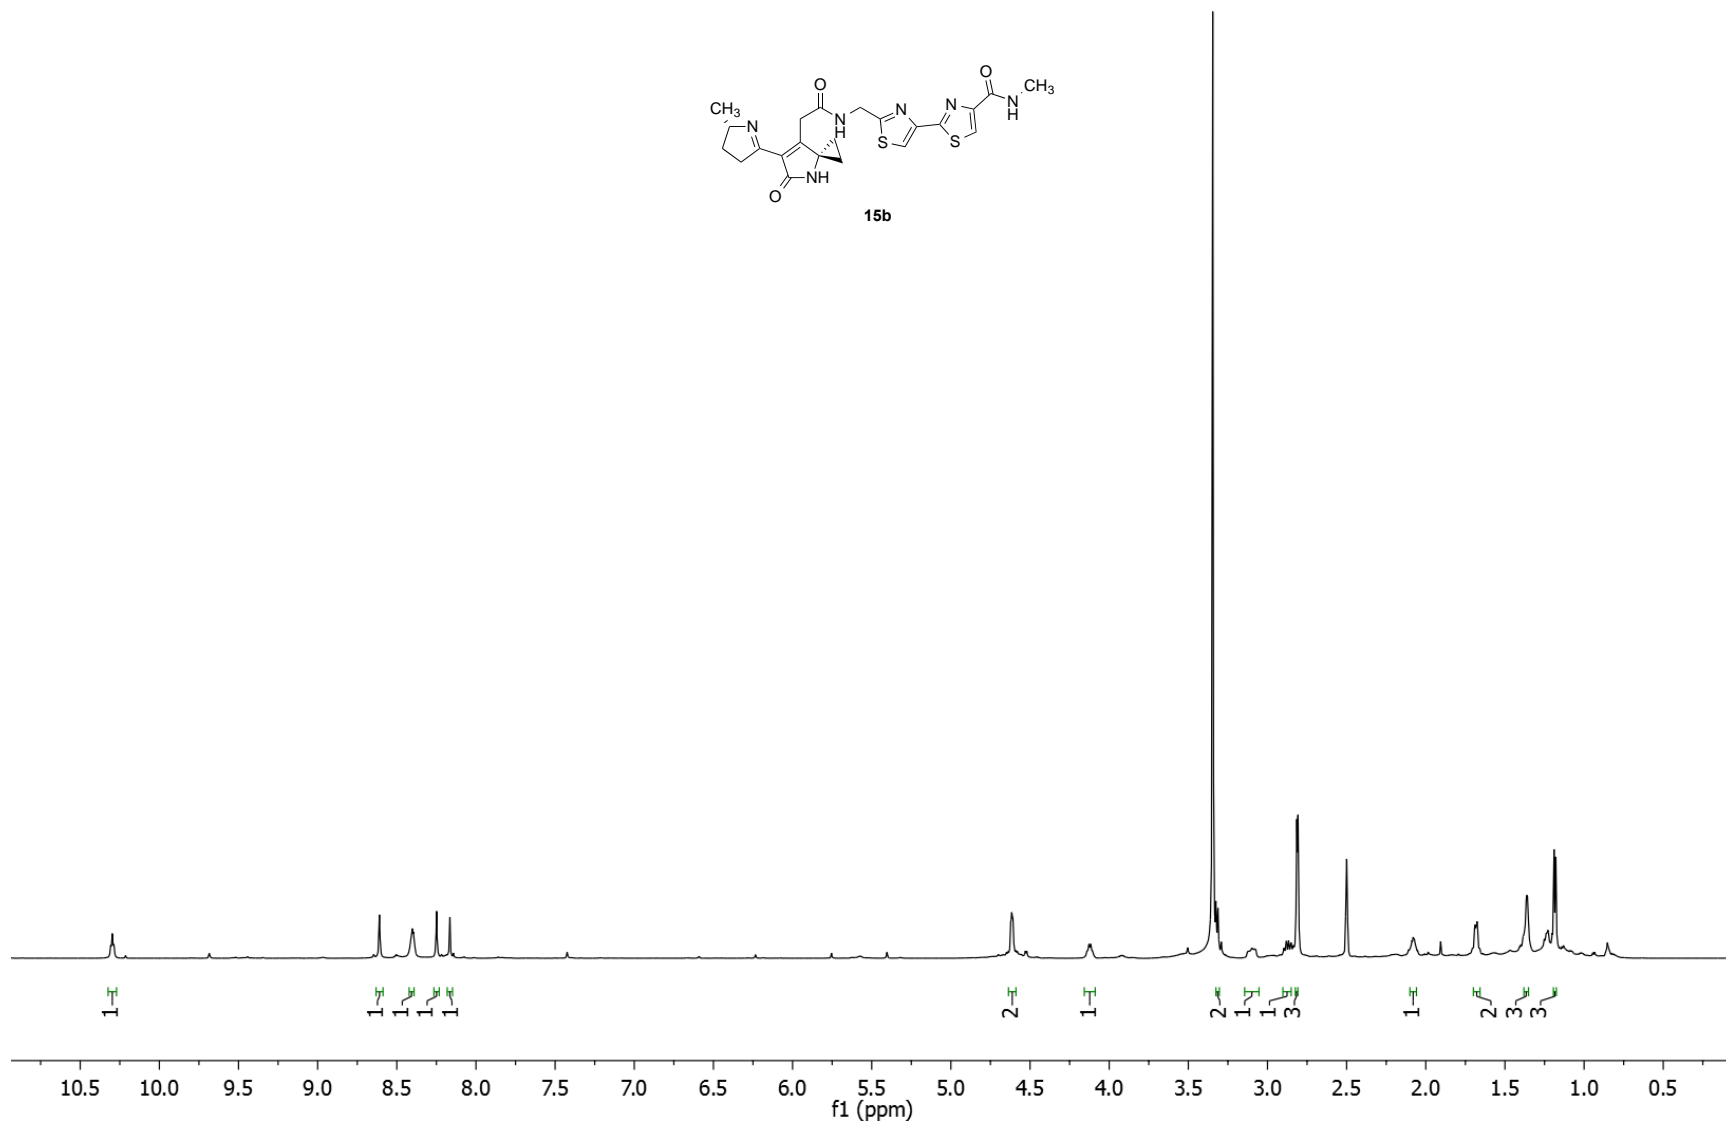

$^{13}\text{C}$  NMR, 125 MHz,  $\text{DMSO-}d_6$

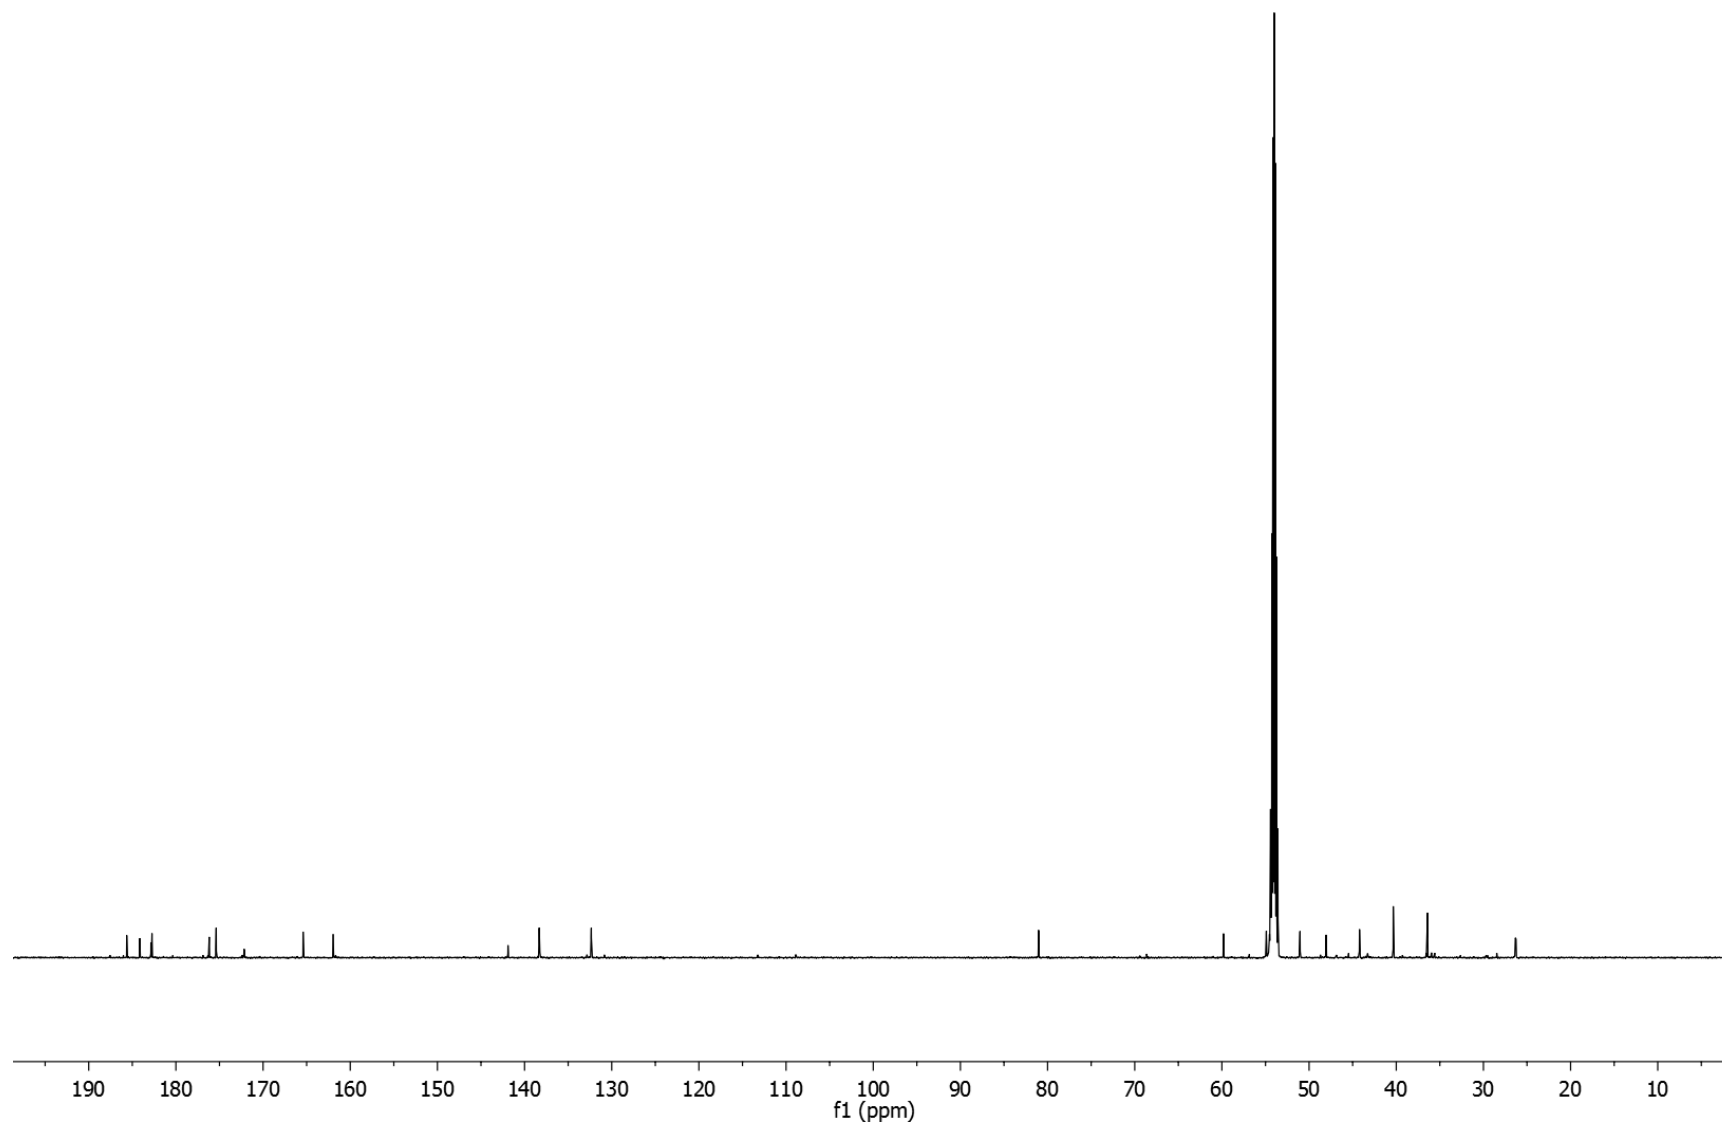

<sup>1</sup>H NMR, 600 MHz, CD<sub>3</sub>OD

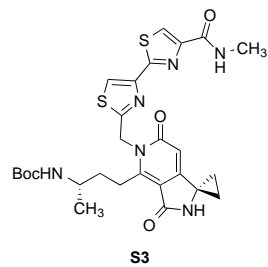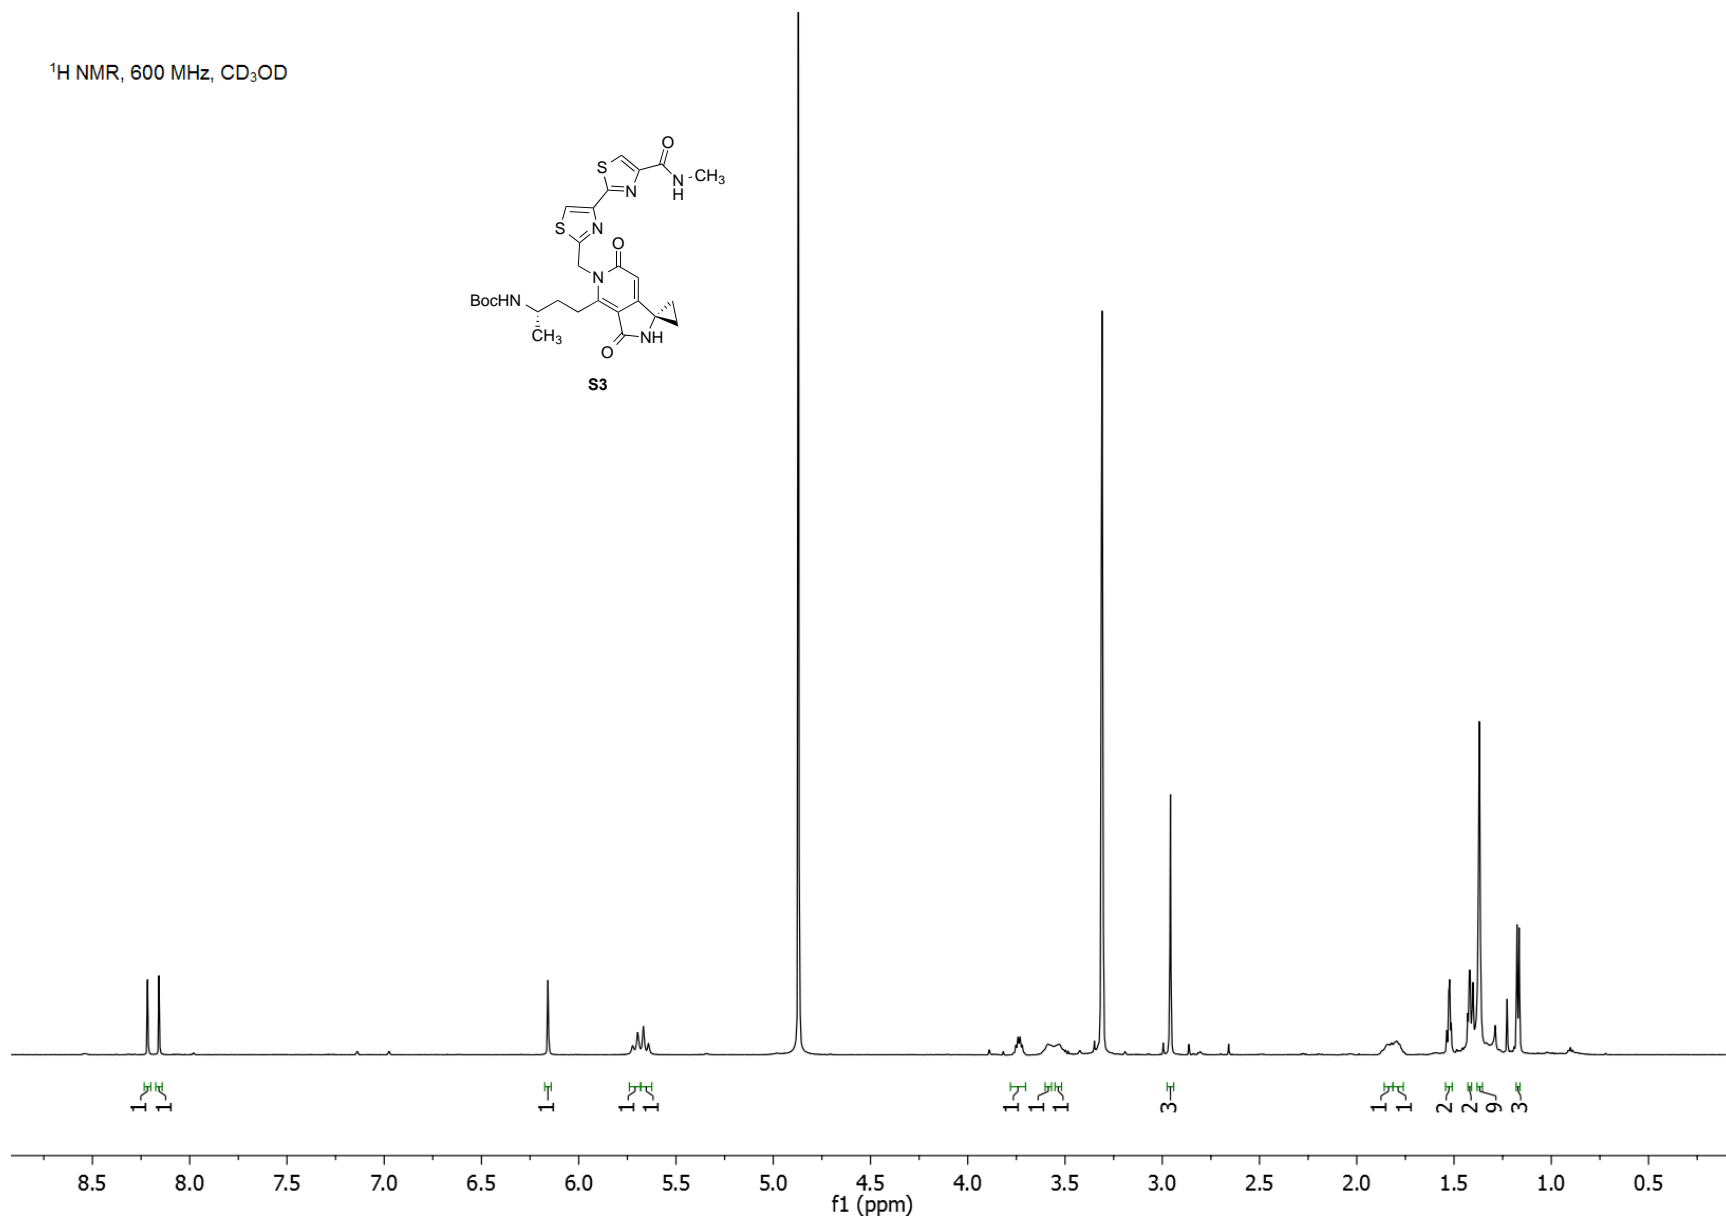

$^{13}\text{C}$  NMR, 150 MHz,  $\text{CD}_3\text{OD}$

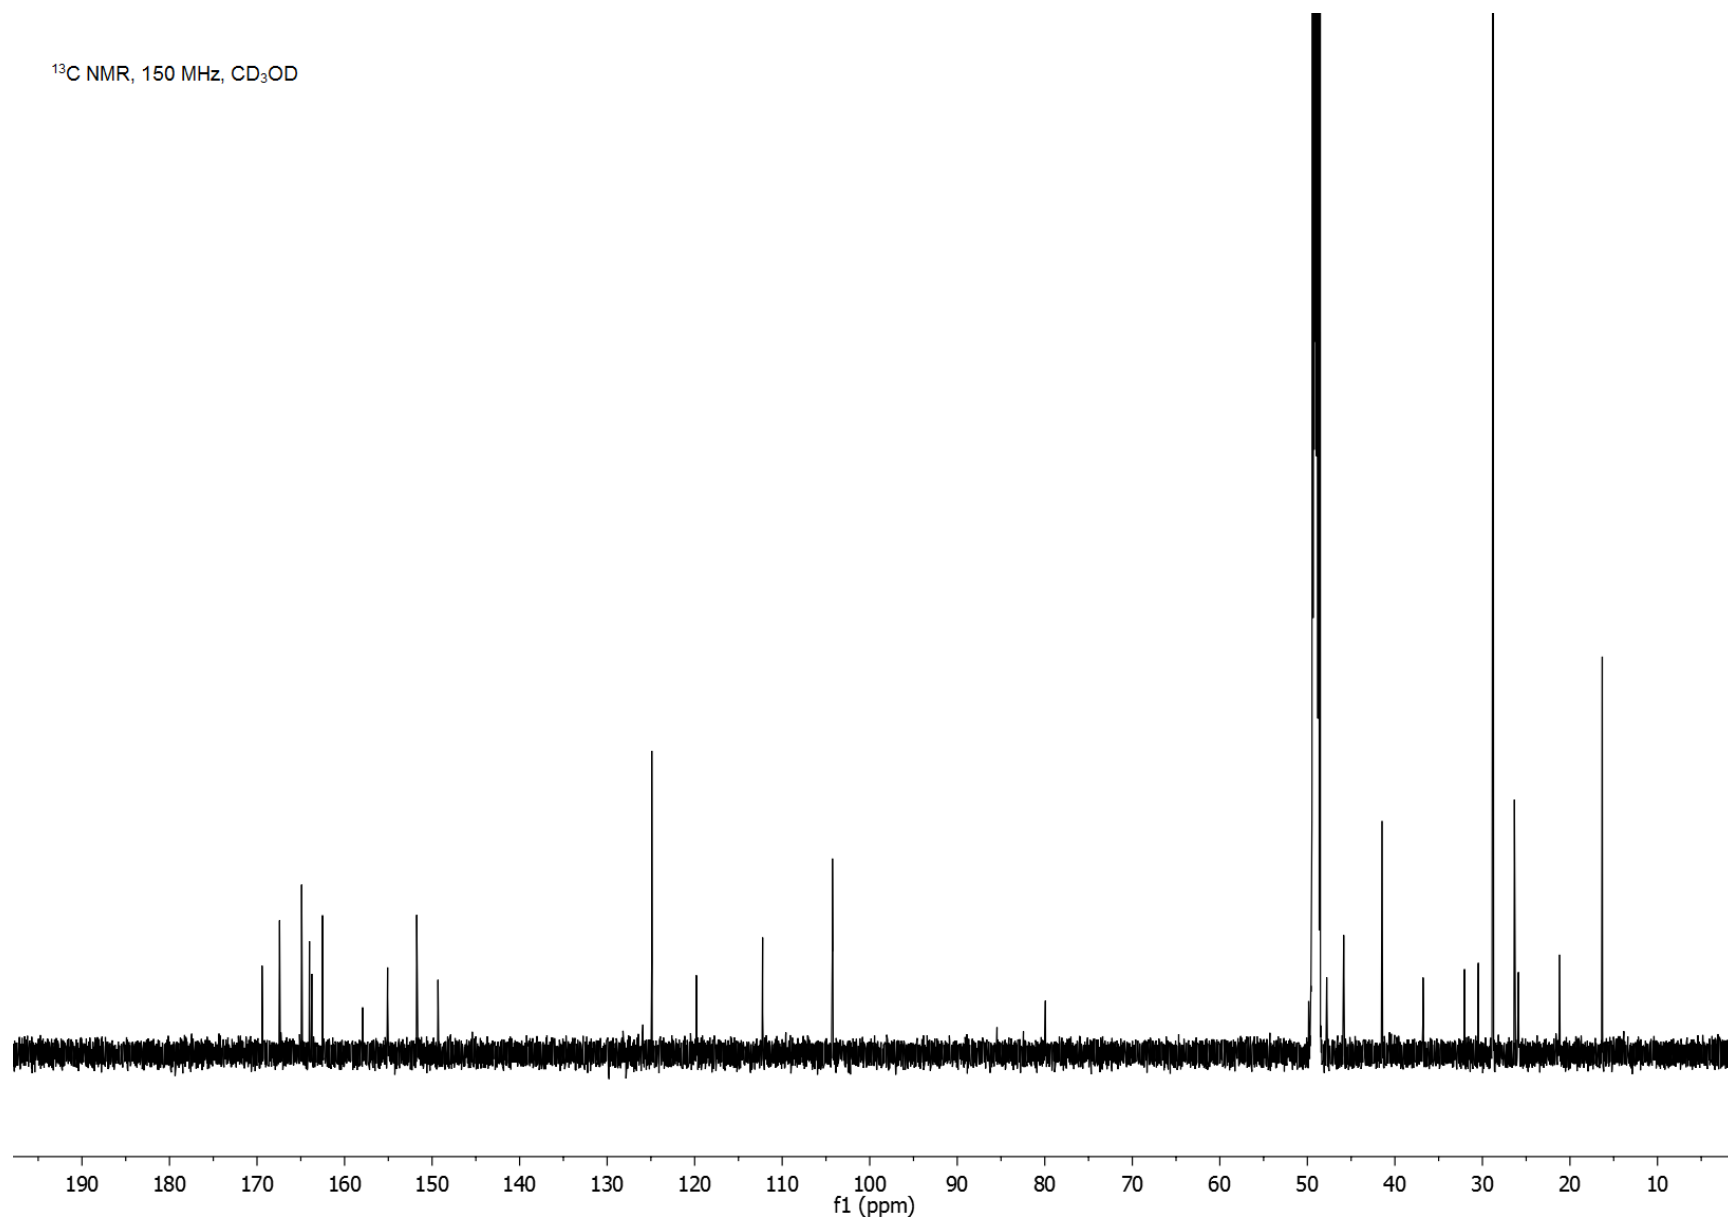



$^1\text{H}$  NMR, 600 MHz,  $\text{CD}_3\text{OD}$

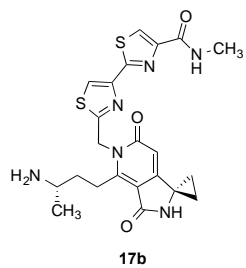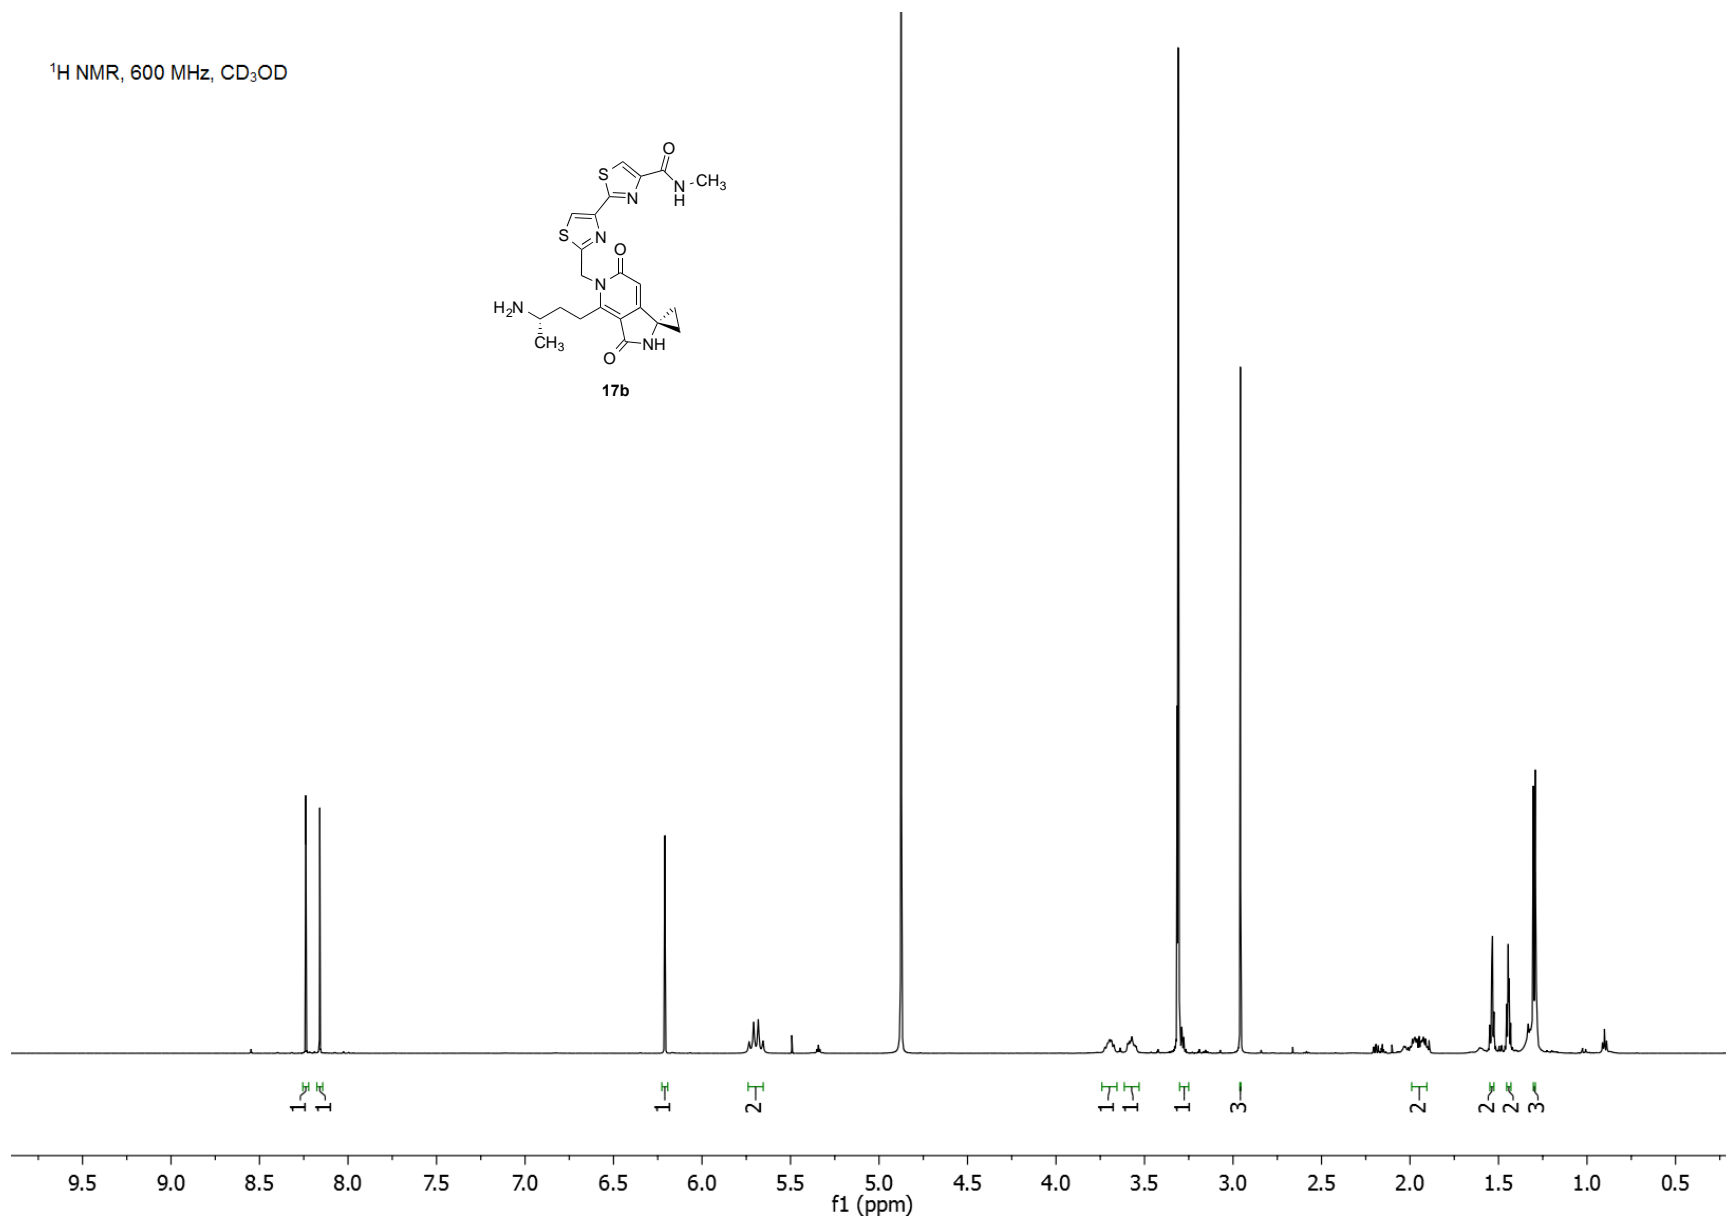

$^{13}\text{C}$  NMR, 125 MHz,  $\text{CD}_3\text{OD}$

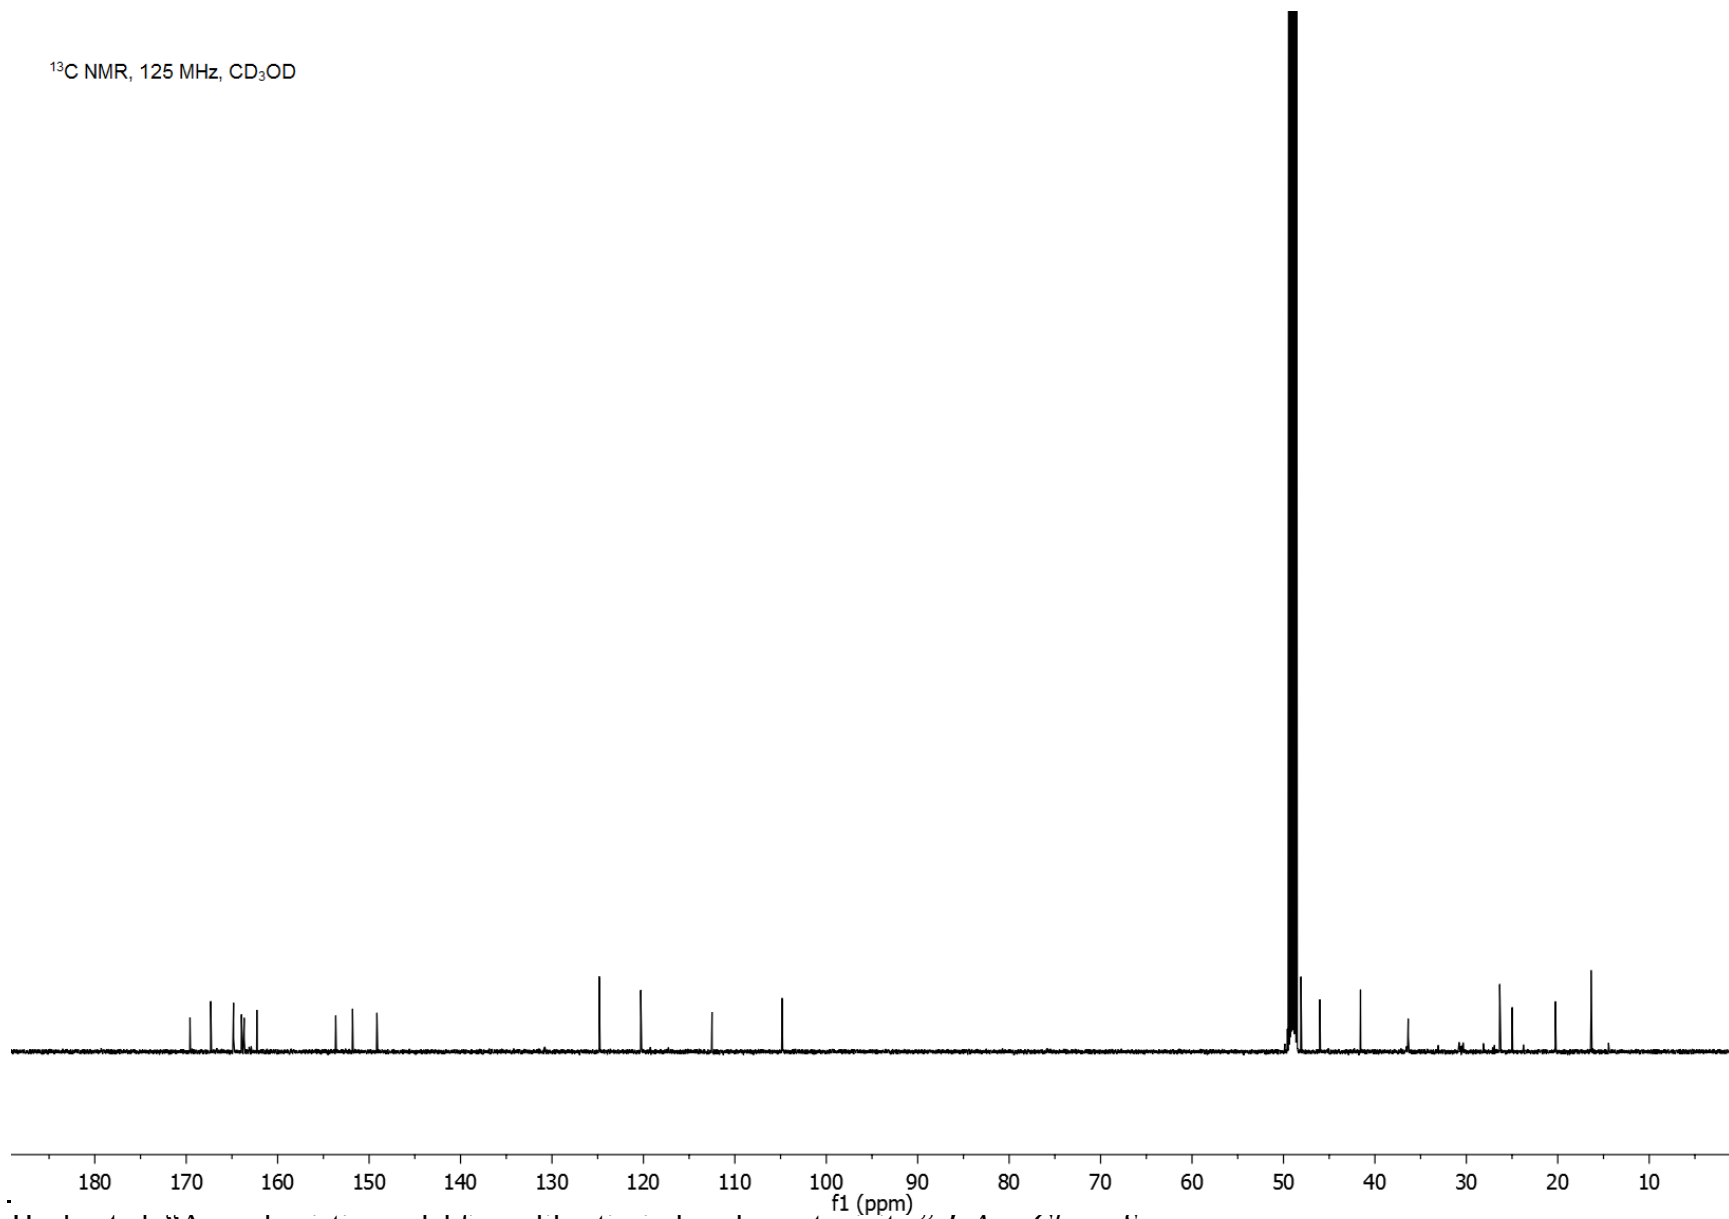

$^1\text{H}$  NMR, 500 MHz,  $\text{CD}_2\text{Cl}_2$

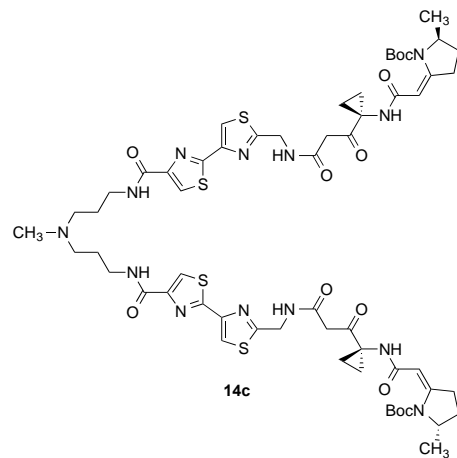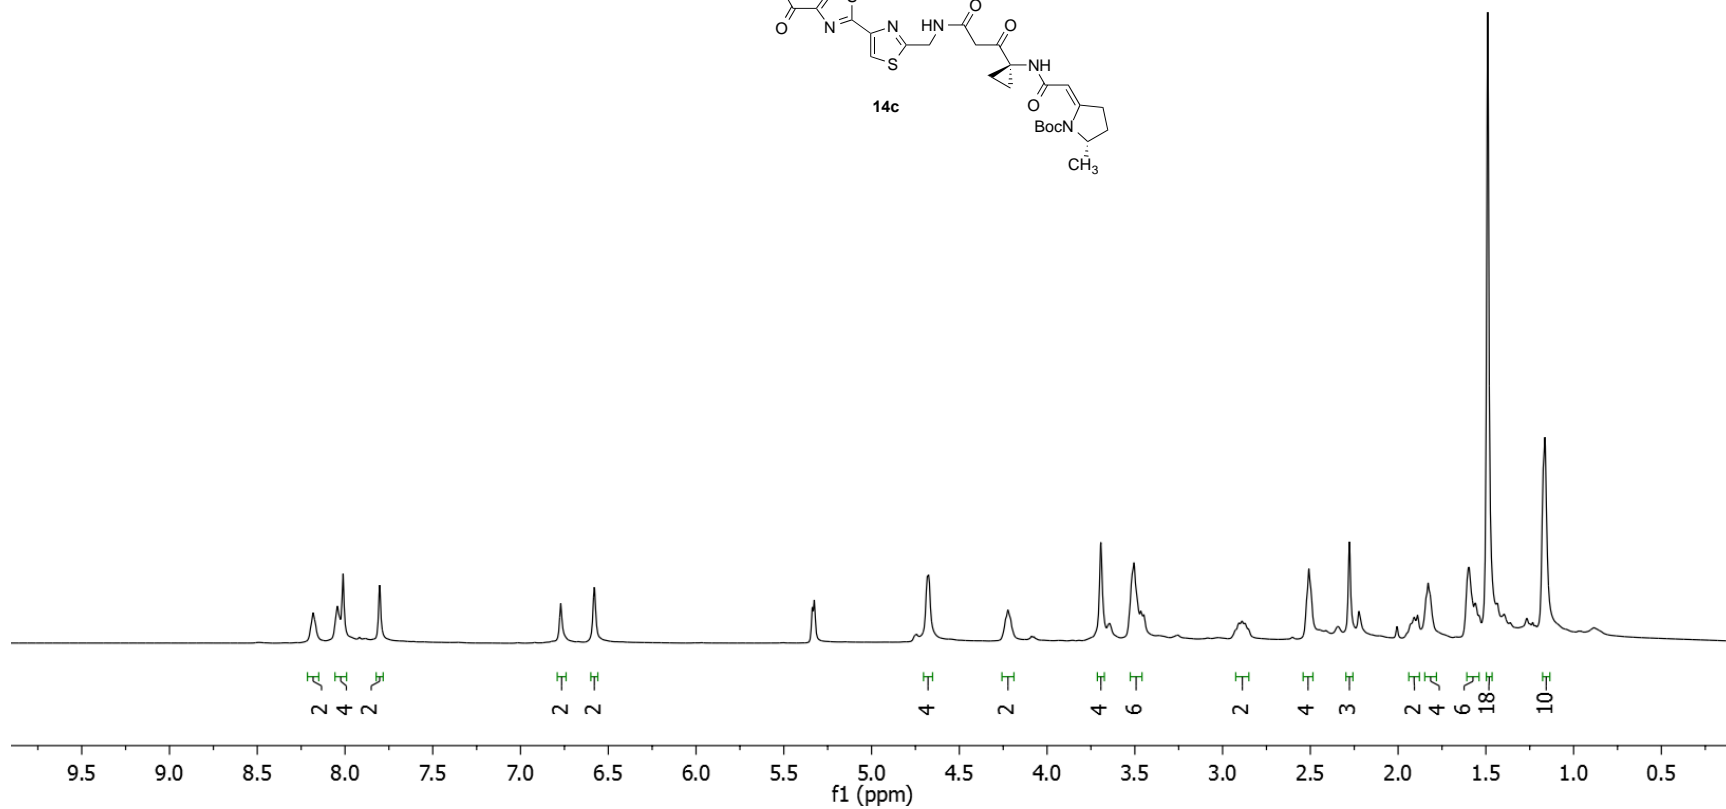

$^{13}\text{C}$  NMR, 125 MHz,  $\text{CD}_2\text{Cl}_2$

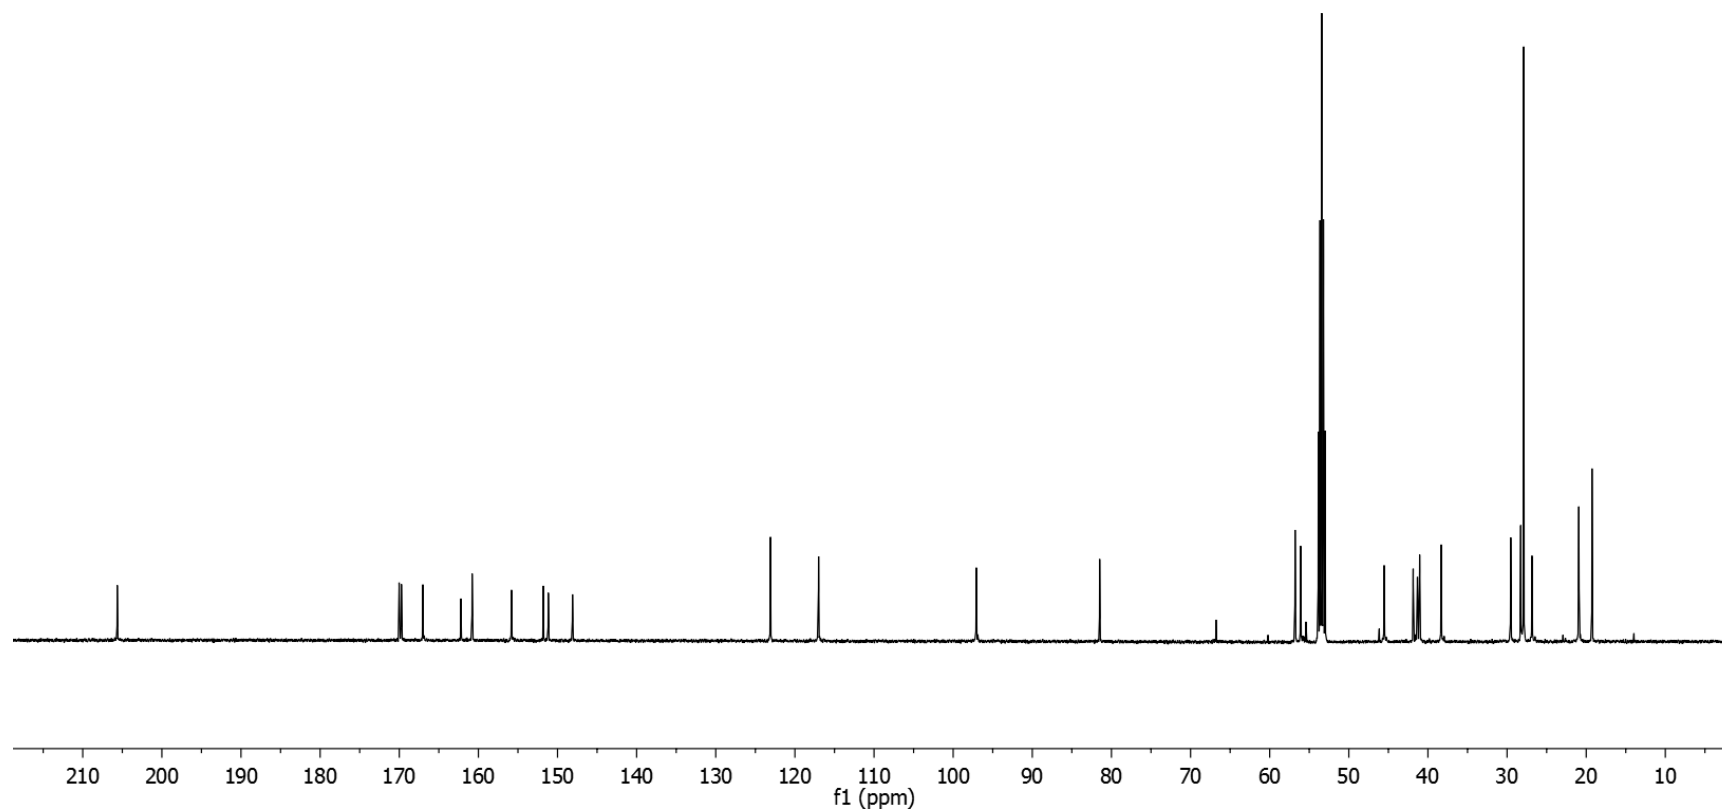

$^1\text{H}$  NMR, 500 MHz,  $\text{DMSO-}d_6$

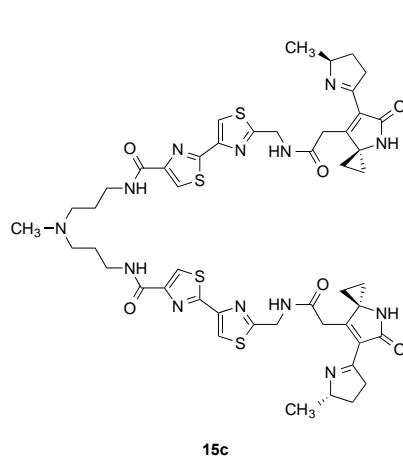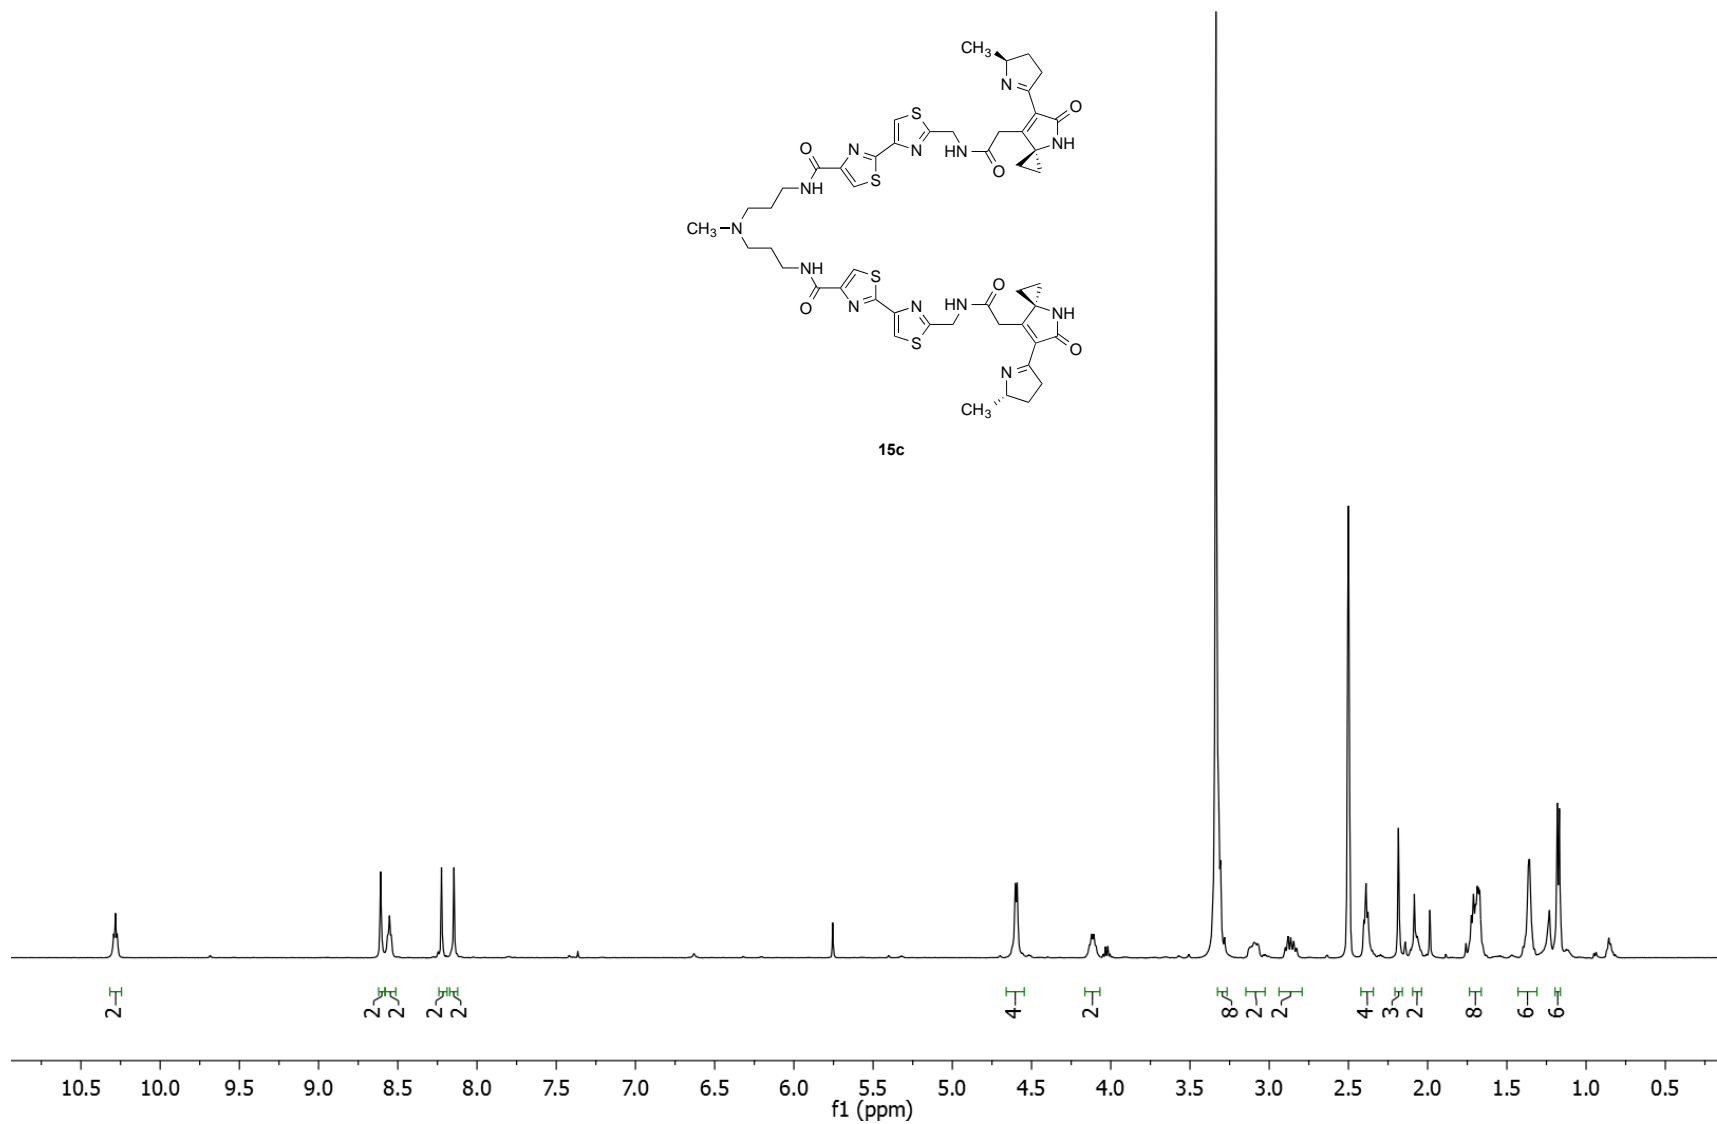

$^{13}\text{C}$  NMR, 125 MHz,  $\text{DMSO-}d_6$

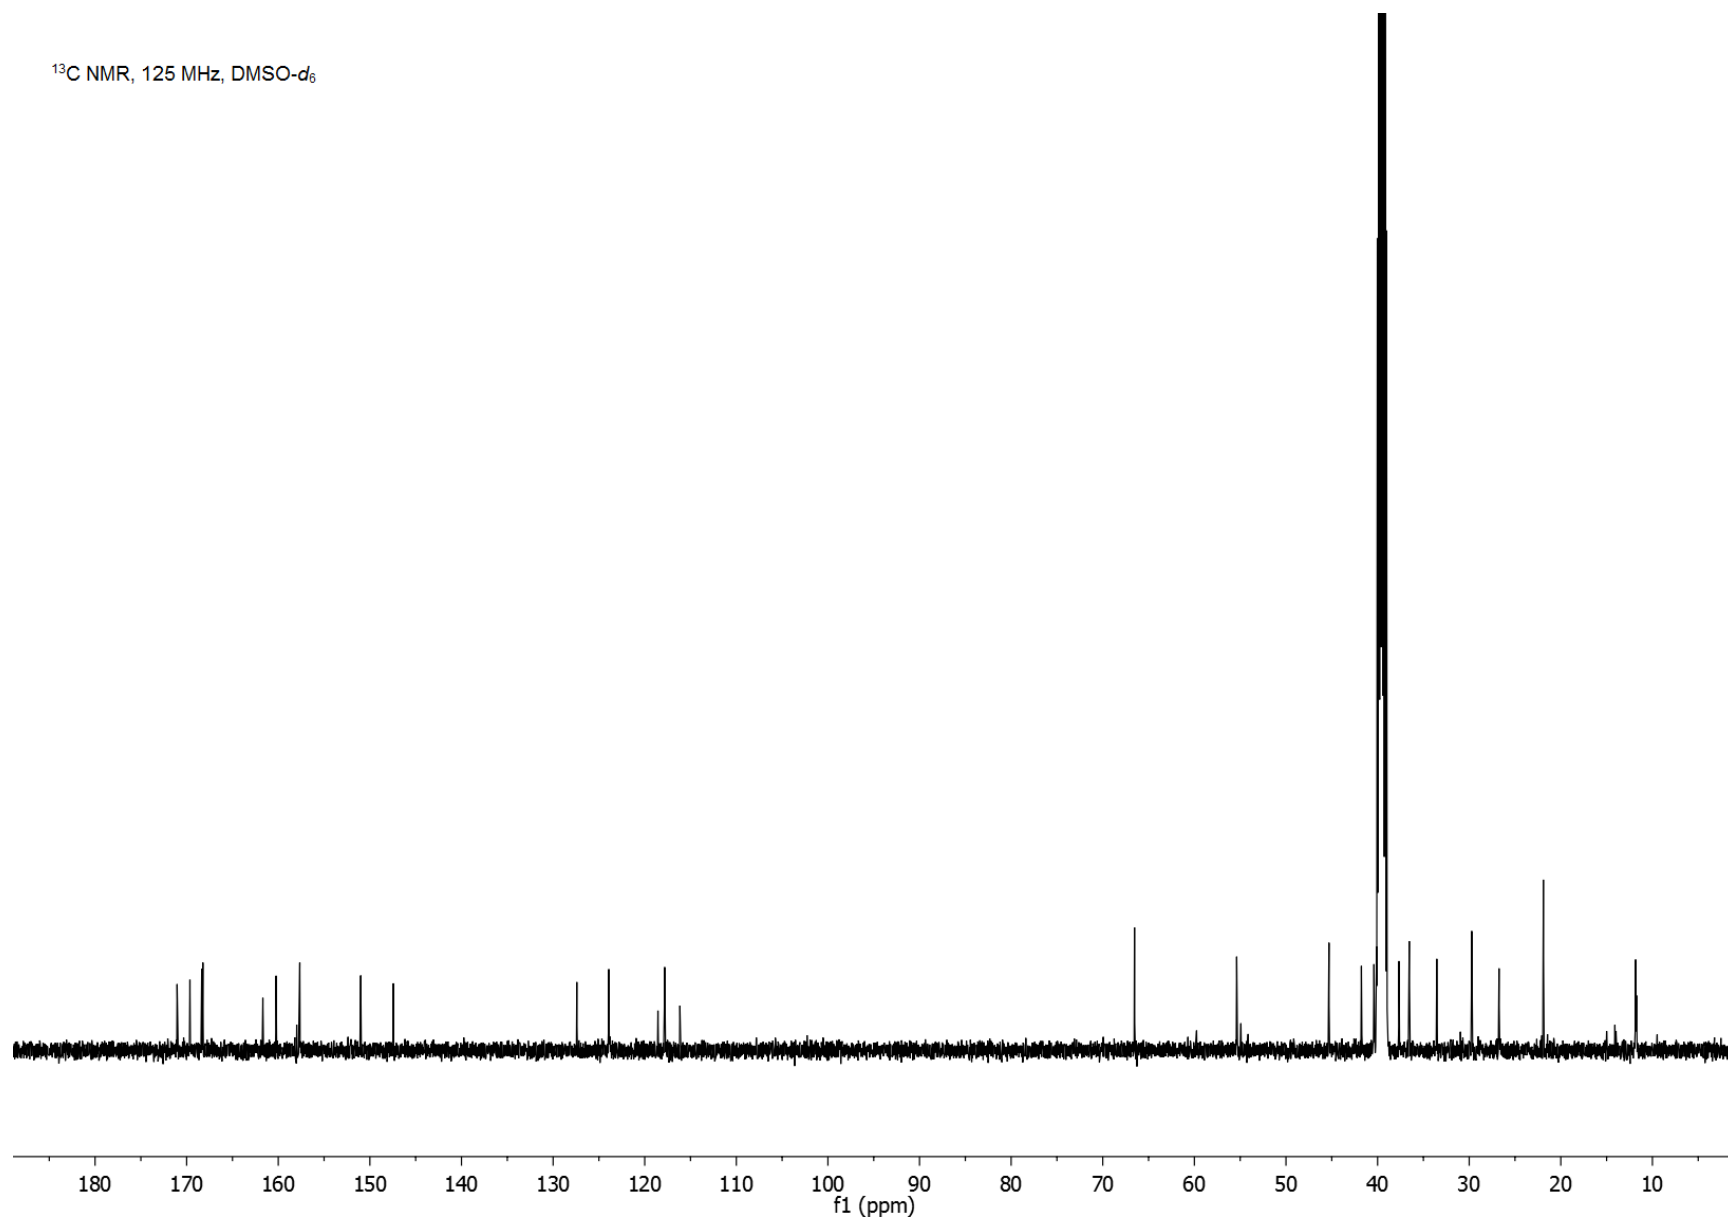

$^1\text{H}$  NMR, 500 MHz,  $\text{CD}_2\text{Cl}_2$

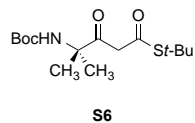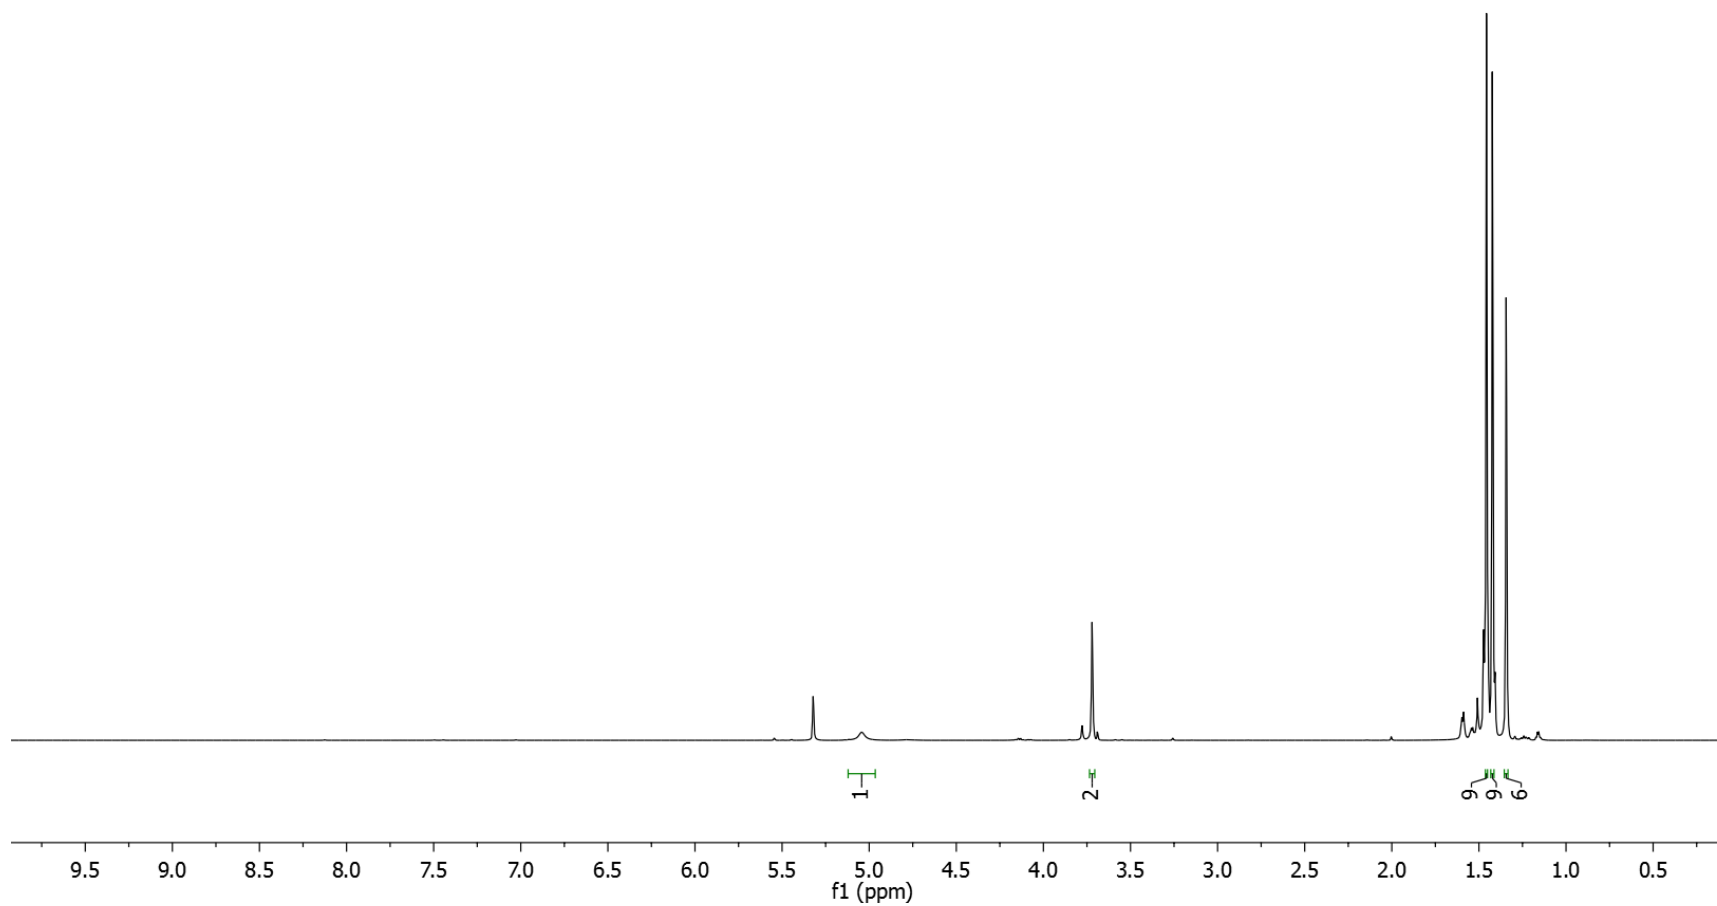

$^{13}\text{C}$  NMR, 125 MHz,  $\text{CD}_2\text{Cl}_2$

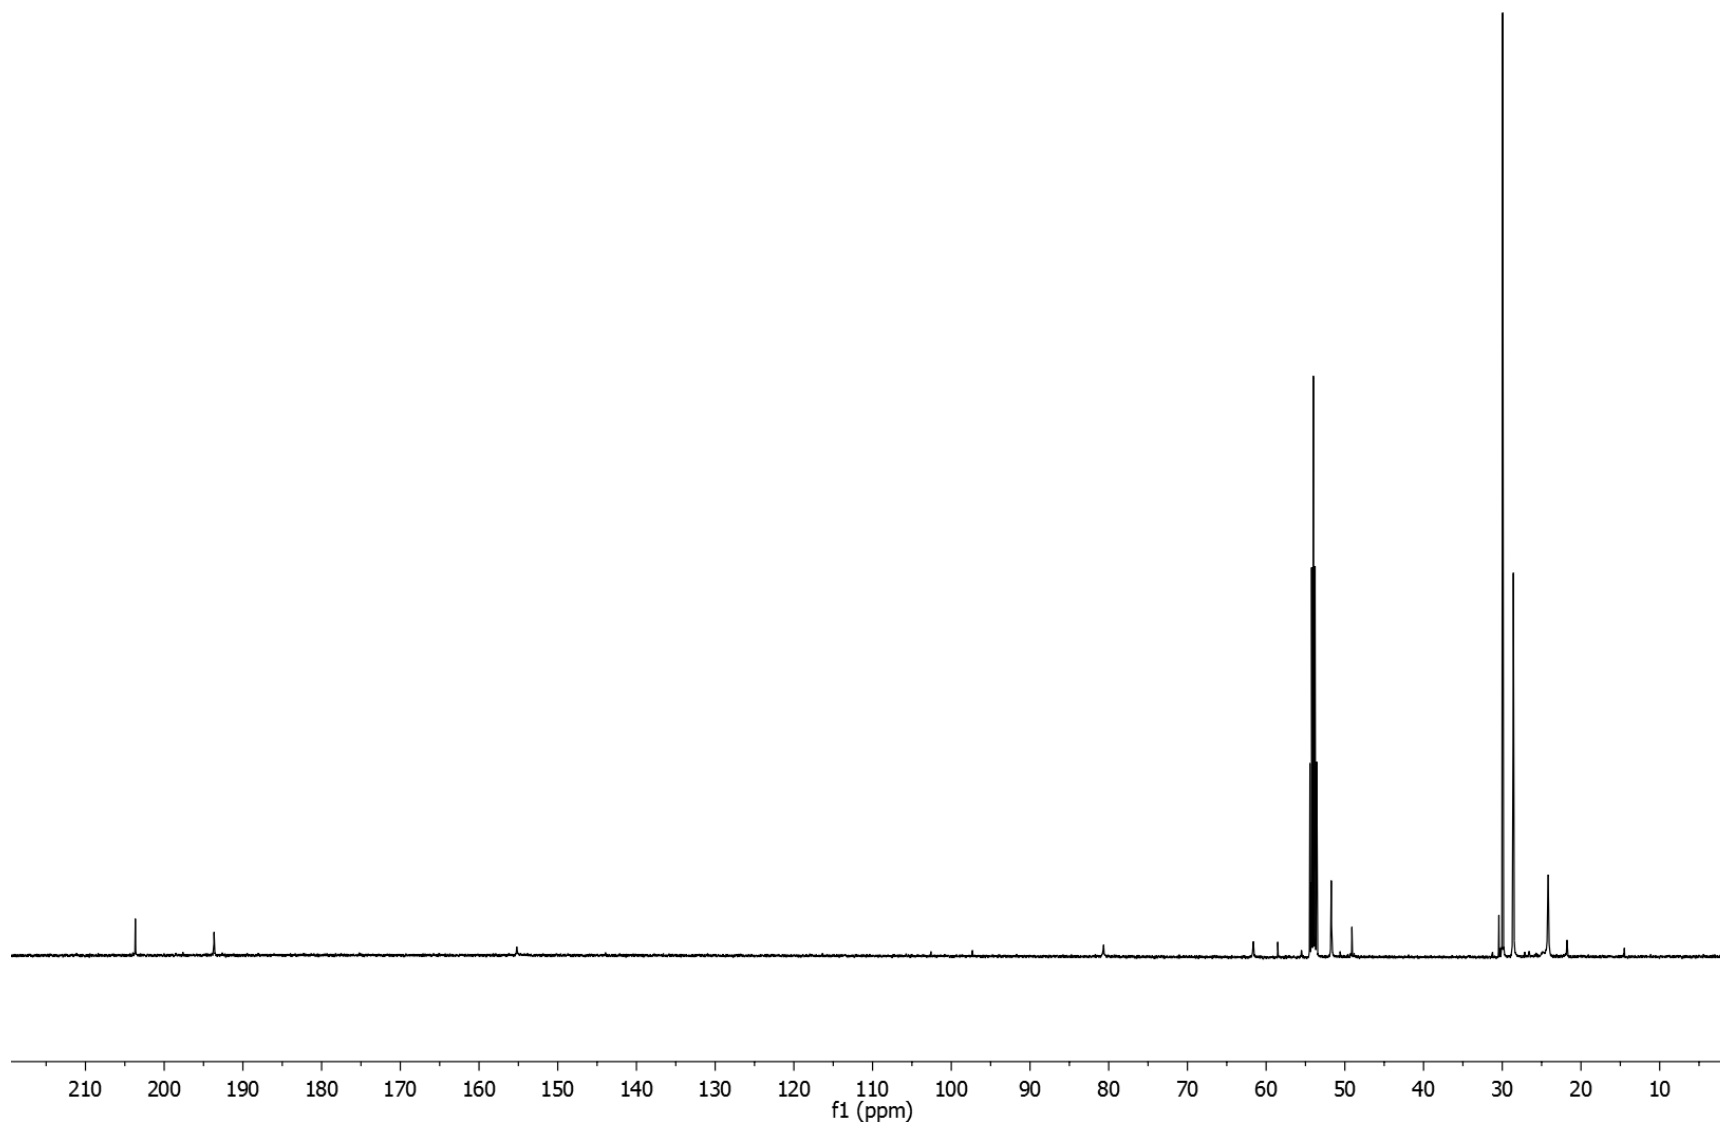



$^1\text{H}$  NMR, 500 MHz,  $\text{DMSO-}d_6$

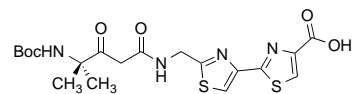

**58**

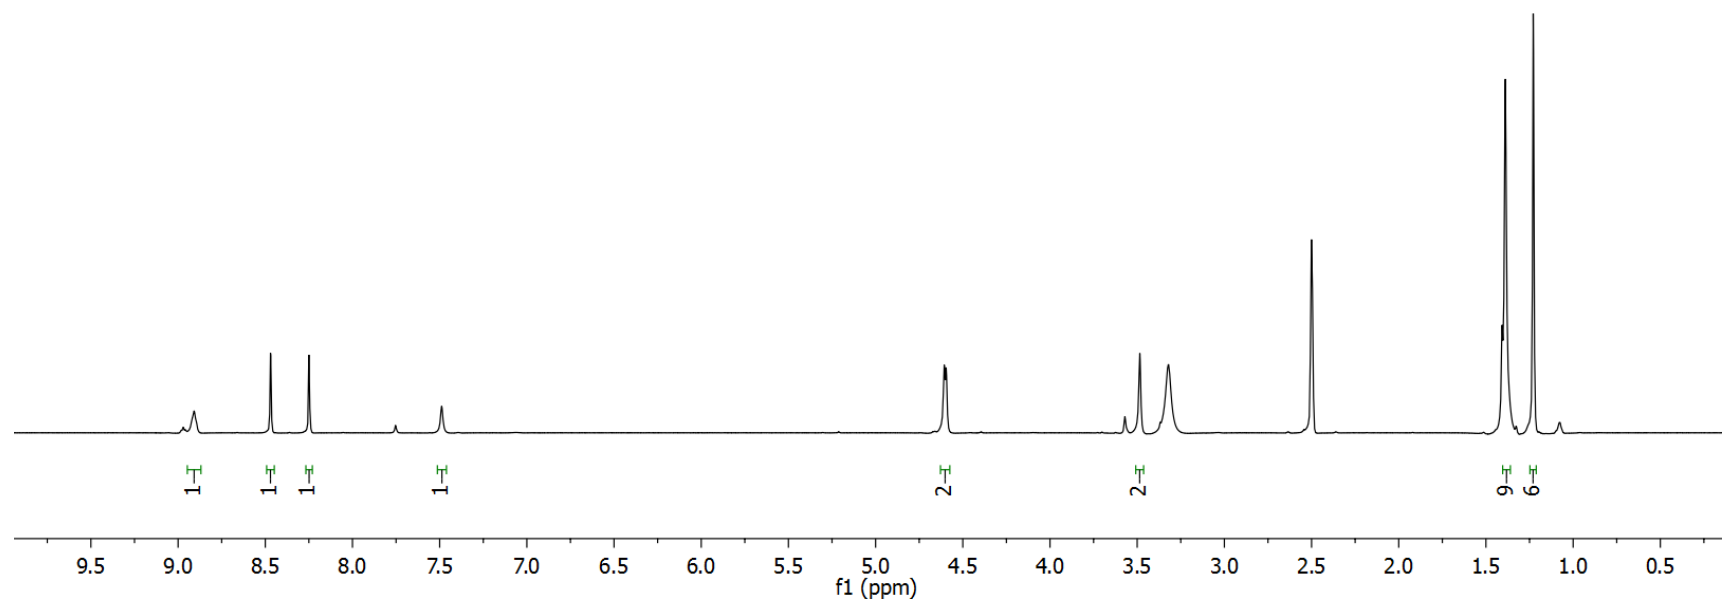

$^{13}\text{C}$  NMR, 125 MHz,  $\text{DMSO-}d_6$

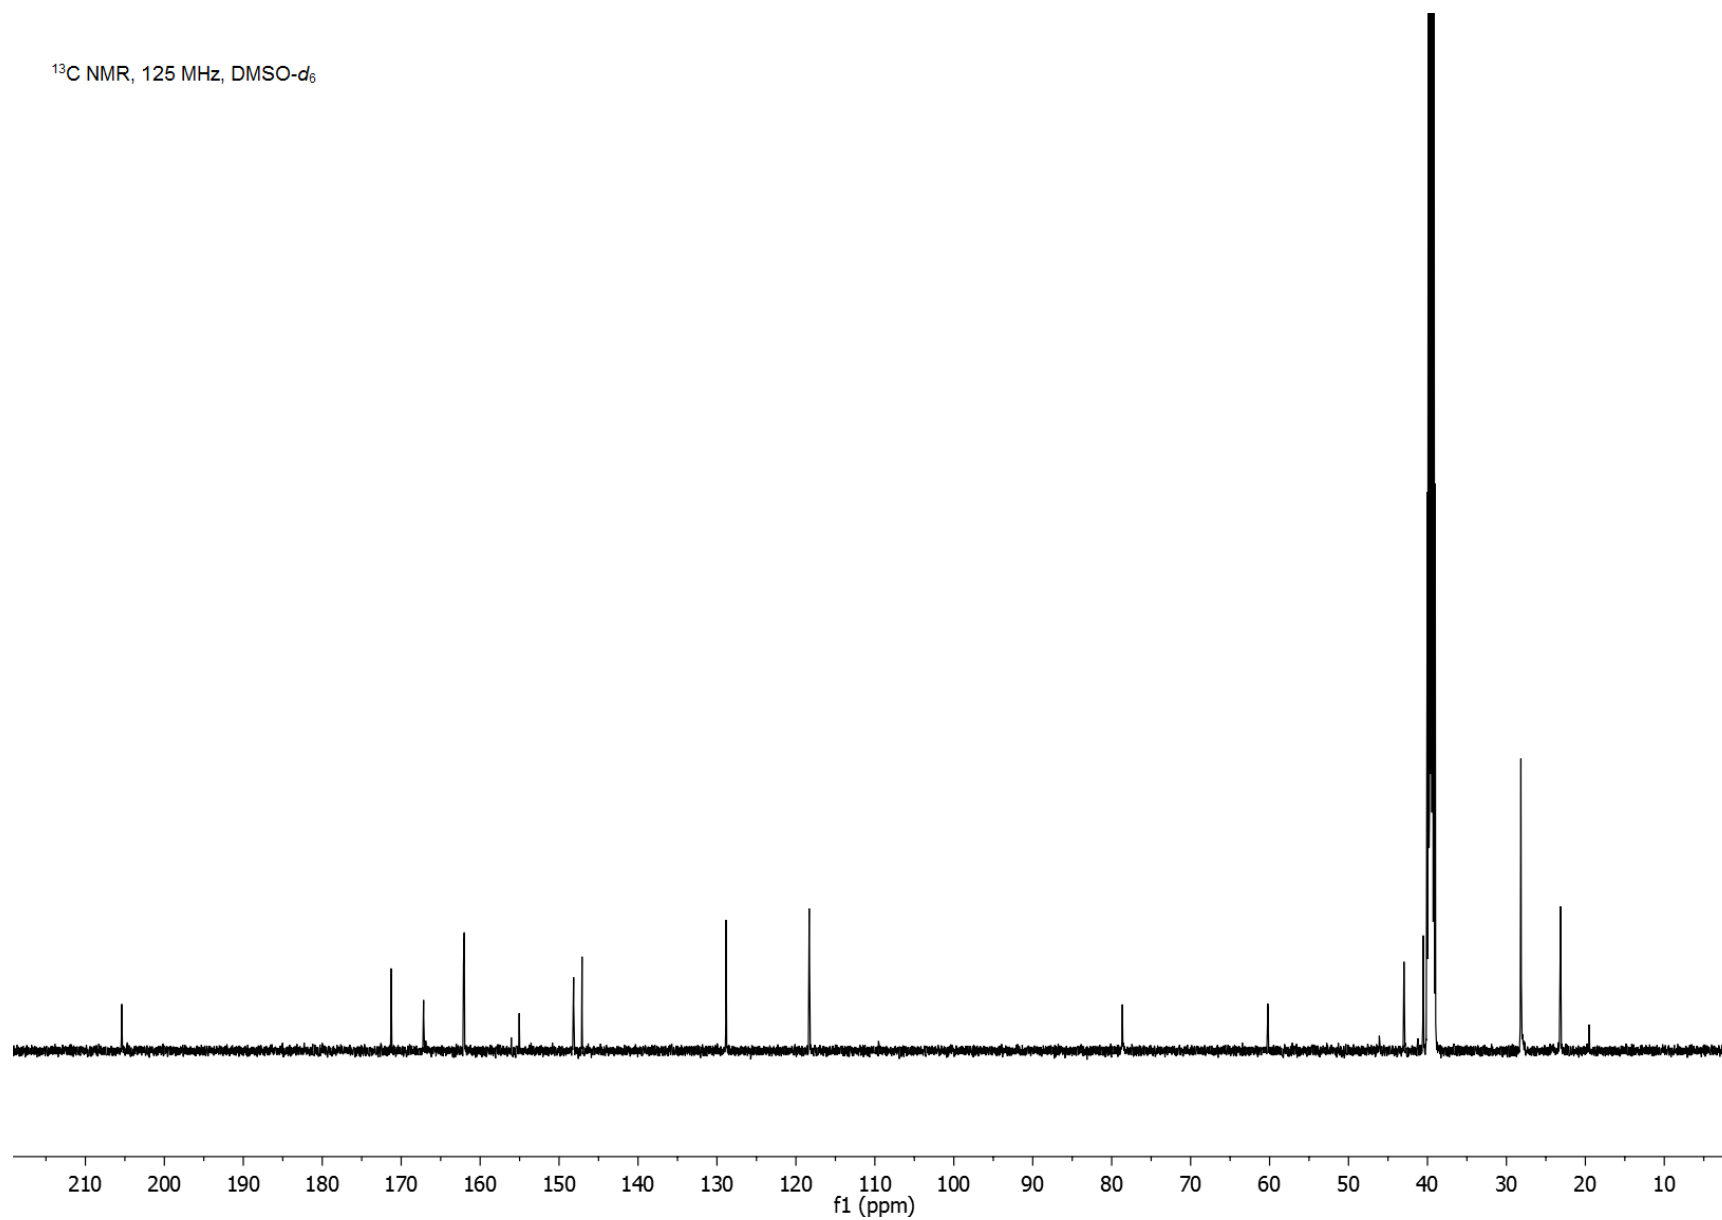

$^1\text{H}$  NMR, 400 MHz,  $\text{DMSO-}d_6$

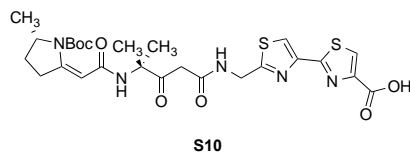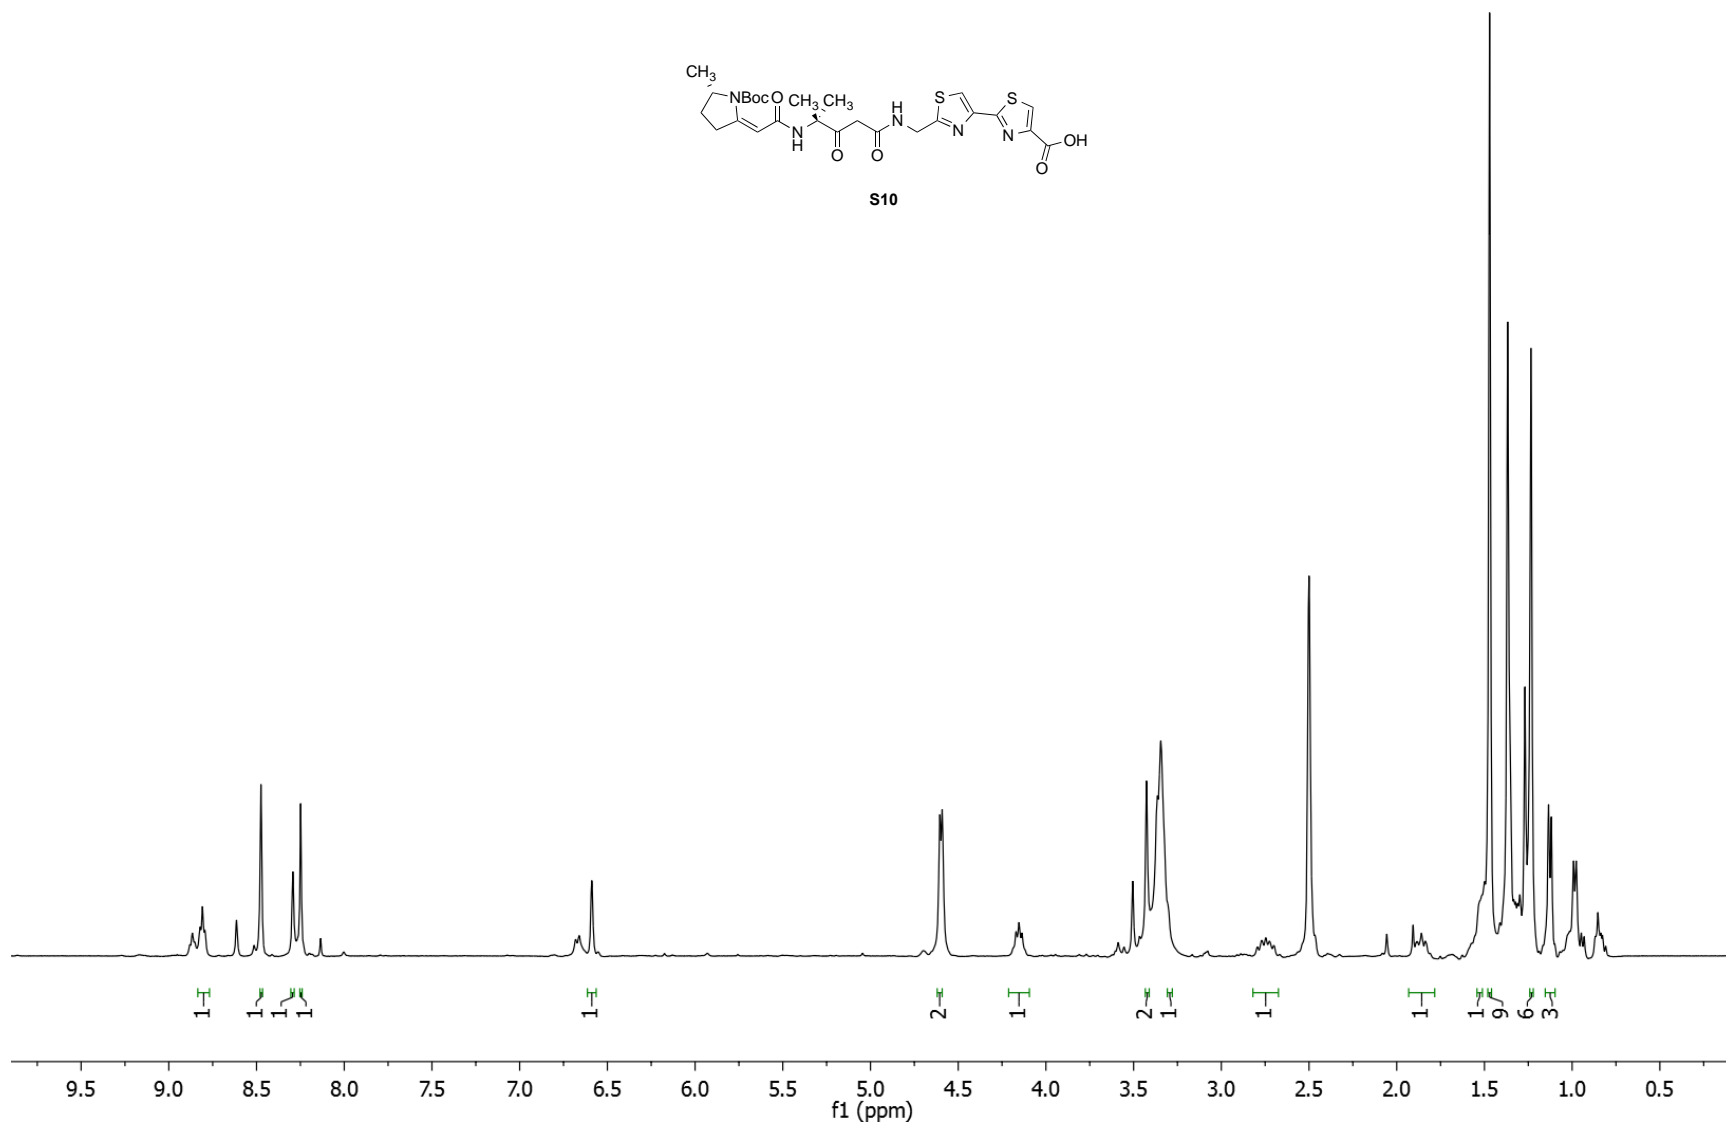



$^{13}\text{C}$  NMR, 100 MHz,  $\text{DMSO-}d_6$

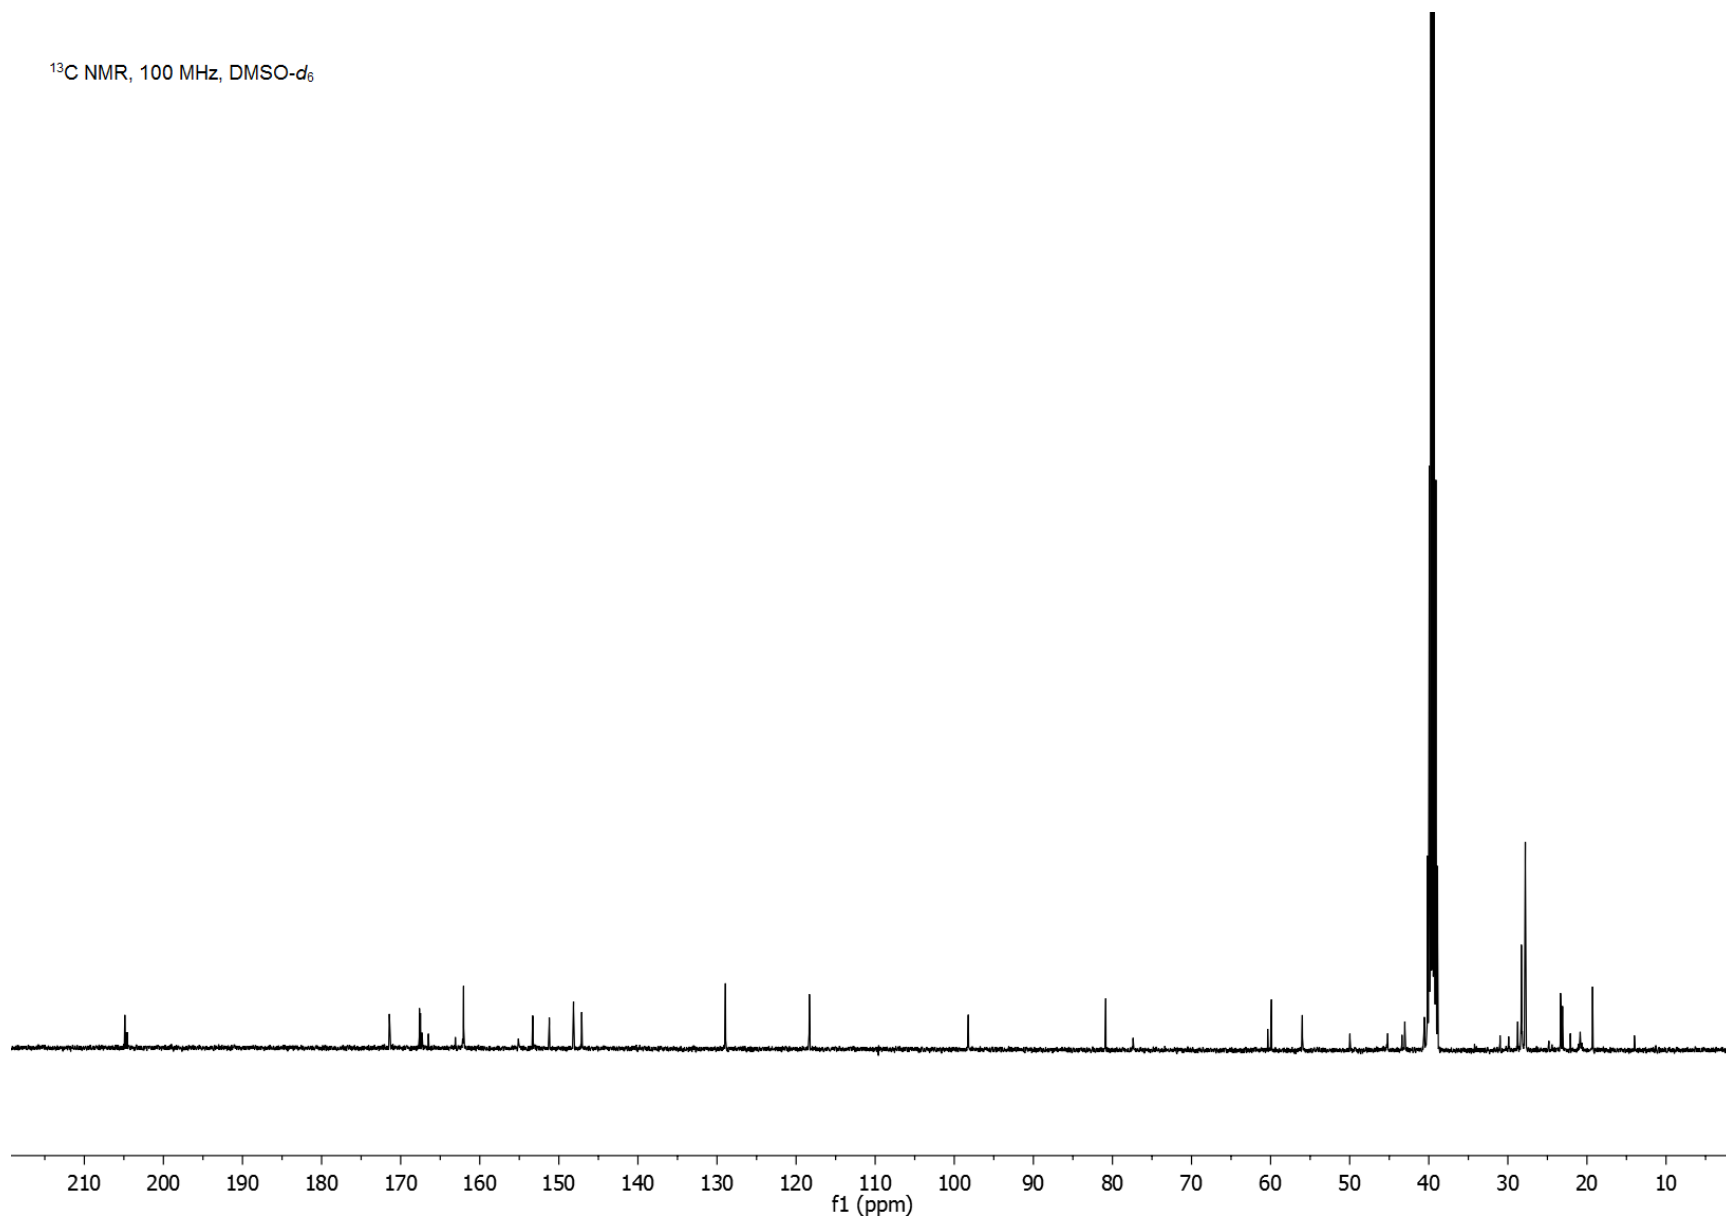

$^1\text{H}$  NMR, 500 MHz,  $\text{CD}_2\text{Cl}_2$

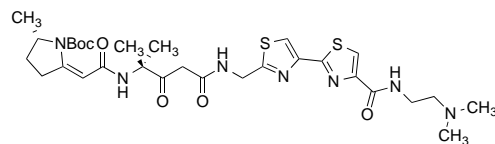

14d

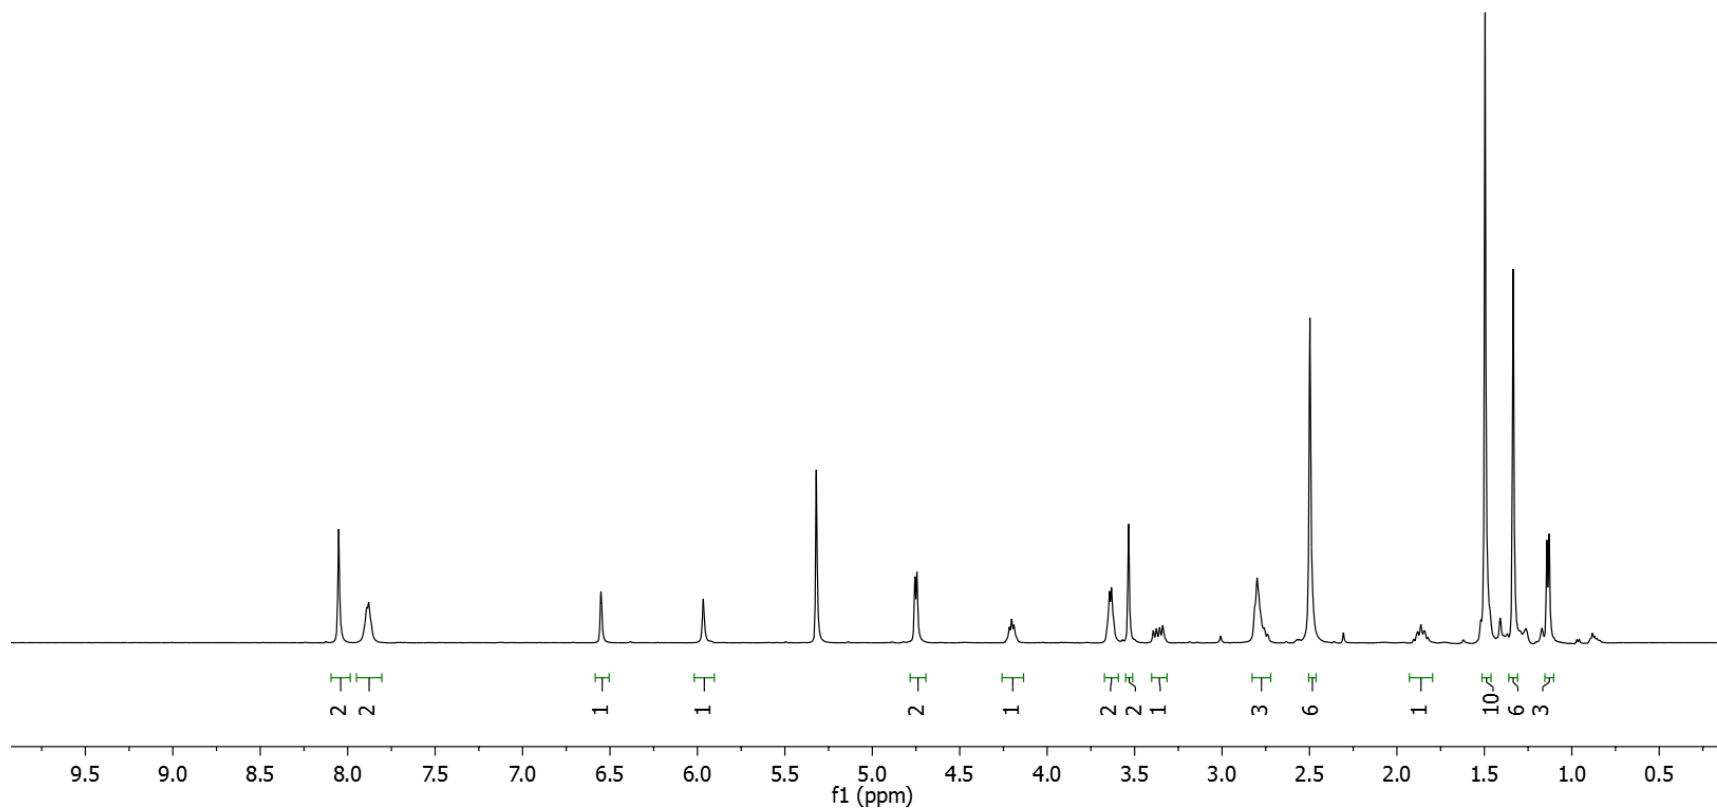

$^{13}\text{C}$  NMR, 125 MHz,  $\text{CD}_2\text{Cl}_2$

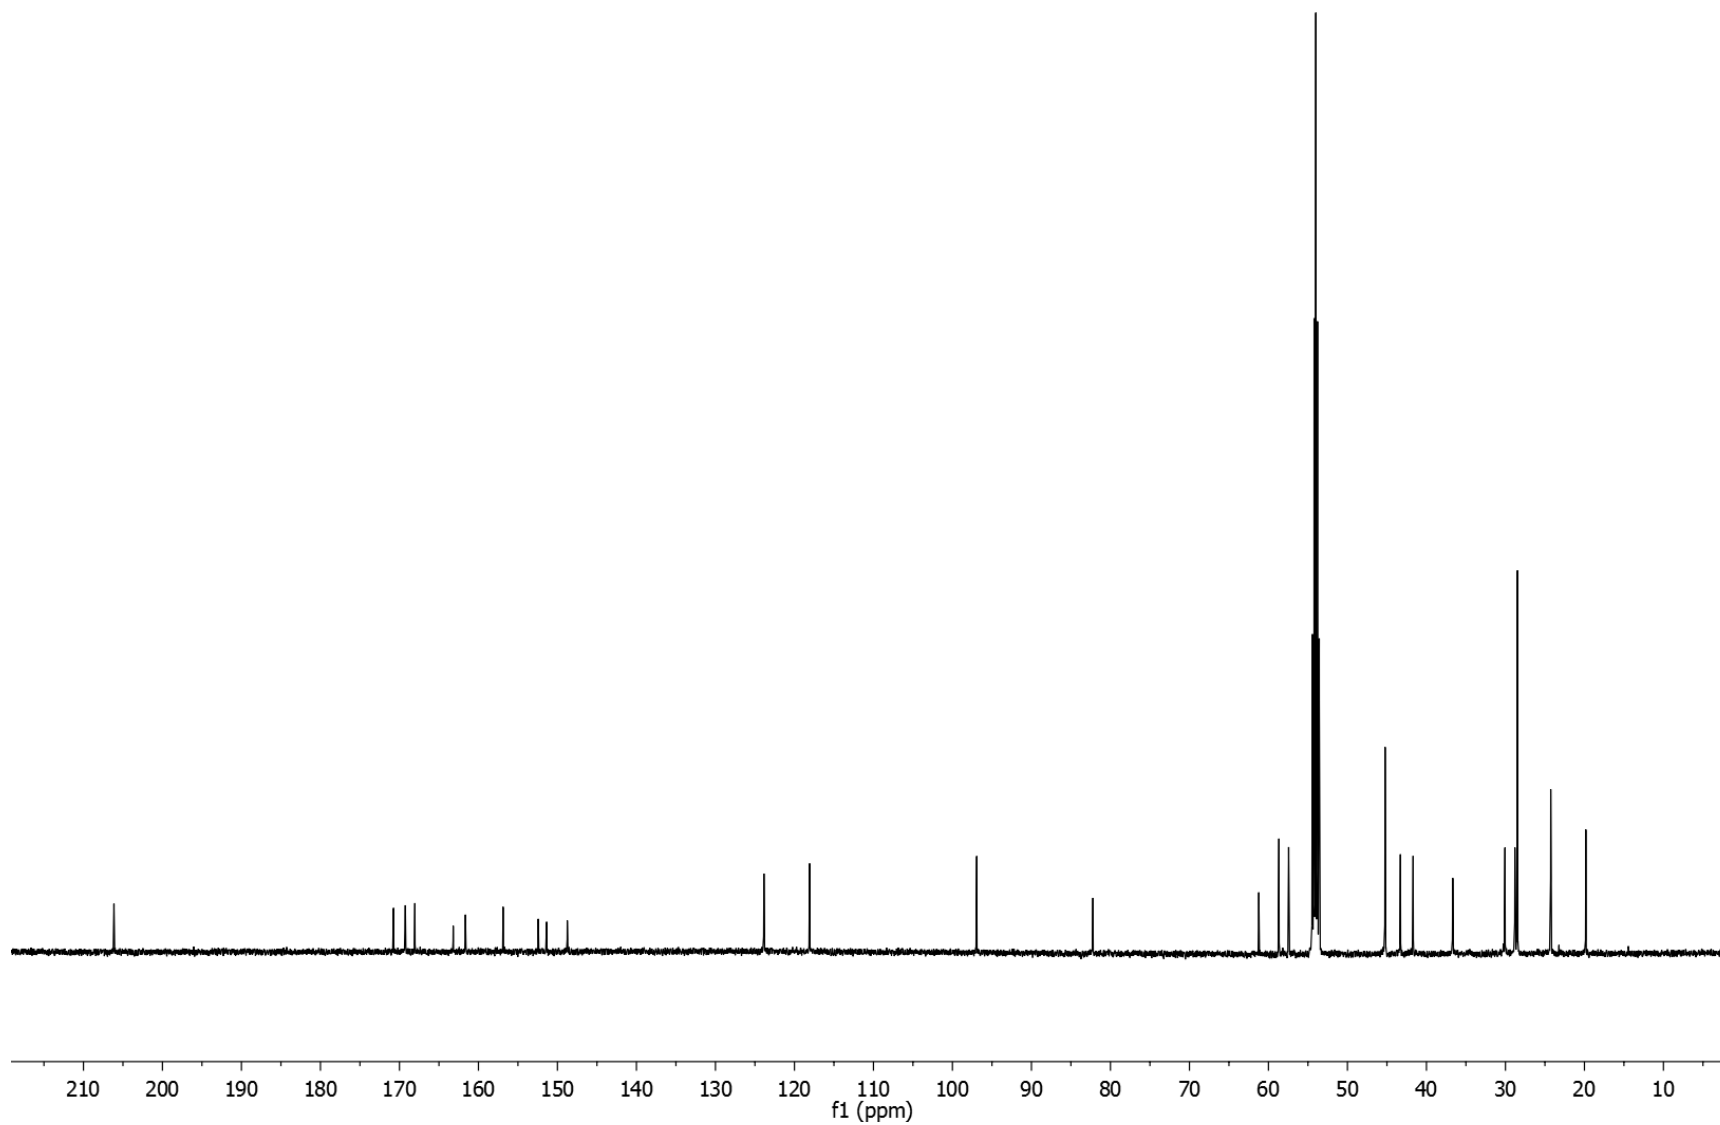

<sup>1</sup>H NMR, 400 MHz, CD<sub>2</sub>Cl<sub>2</sub>

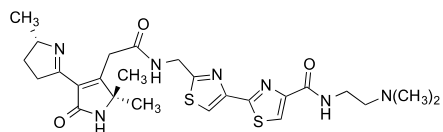

15d

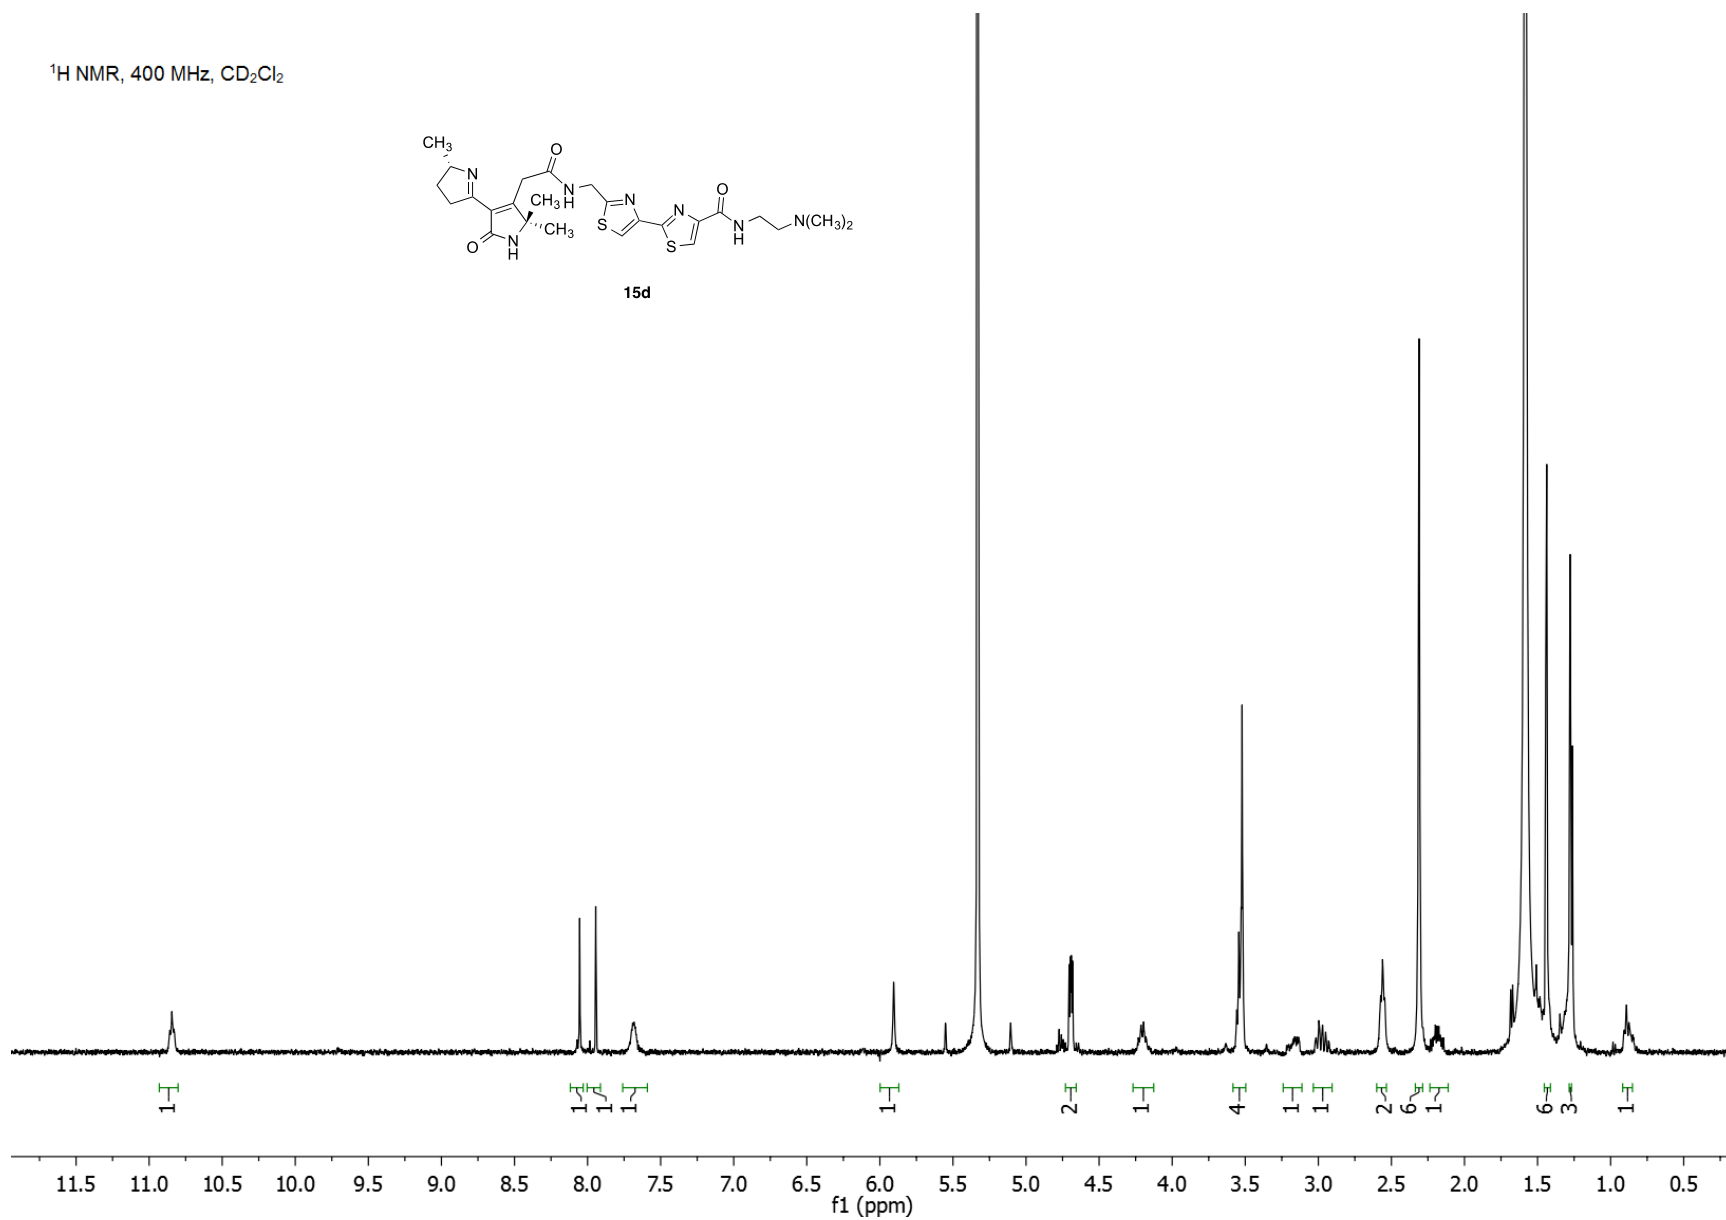



$^{13}\text{C}$  NMR, 125 MHz,  $\text{CD}_2\text{Cl}_2$

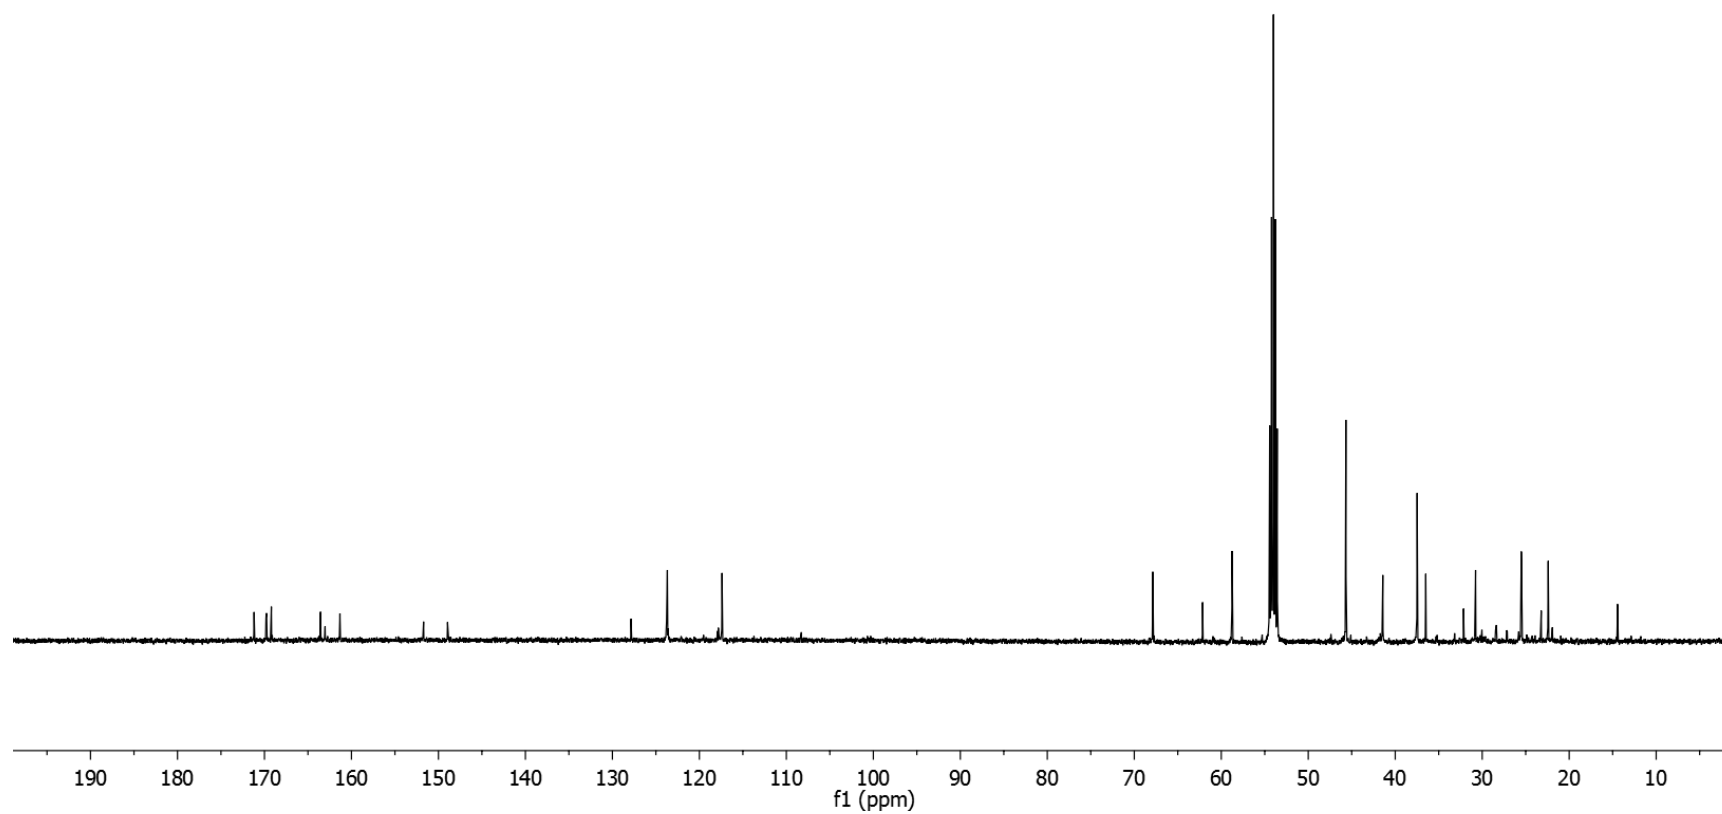

$^1\text{H}$  NMR, 500 MHz,  $\text{DMSO-}d_6$

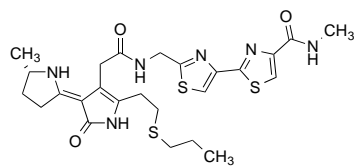

18

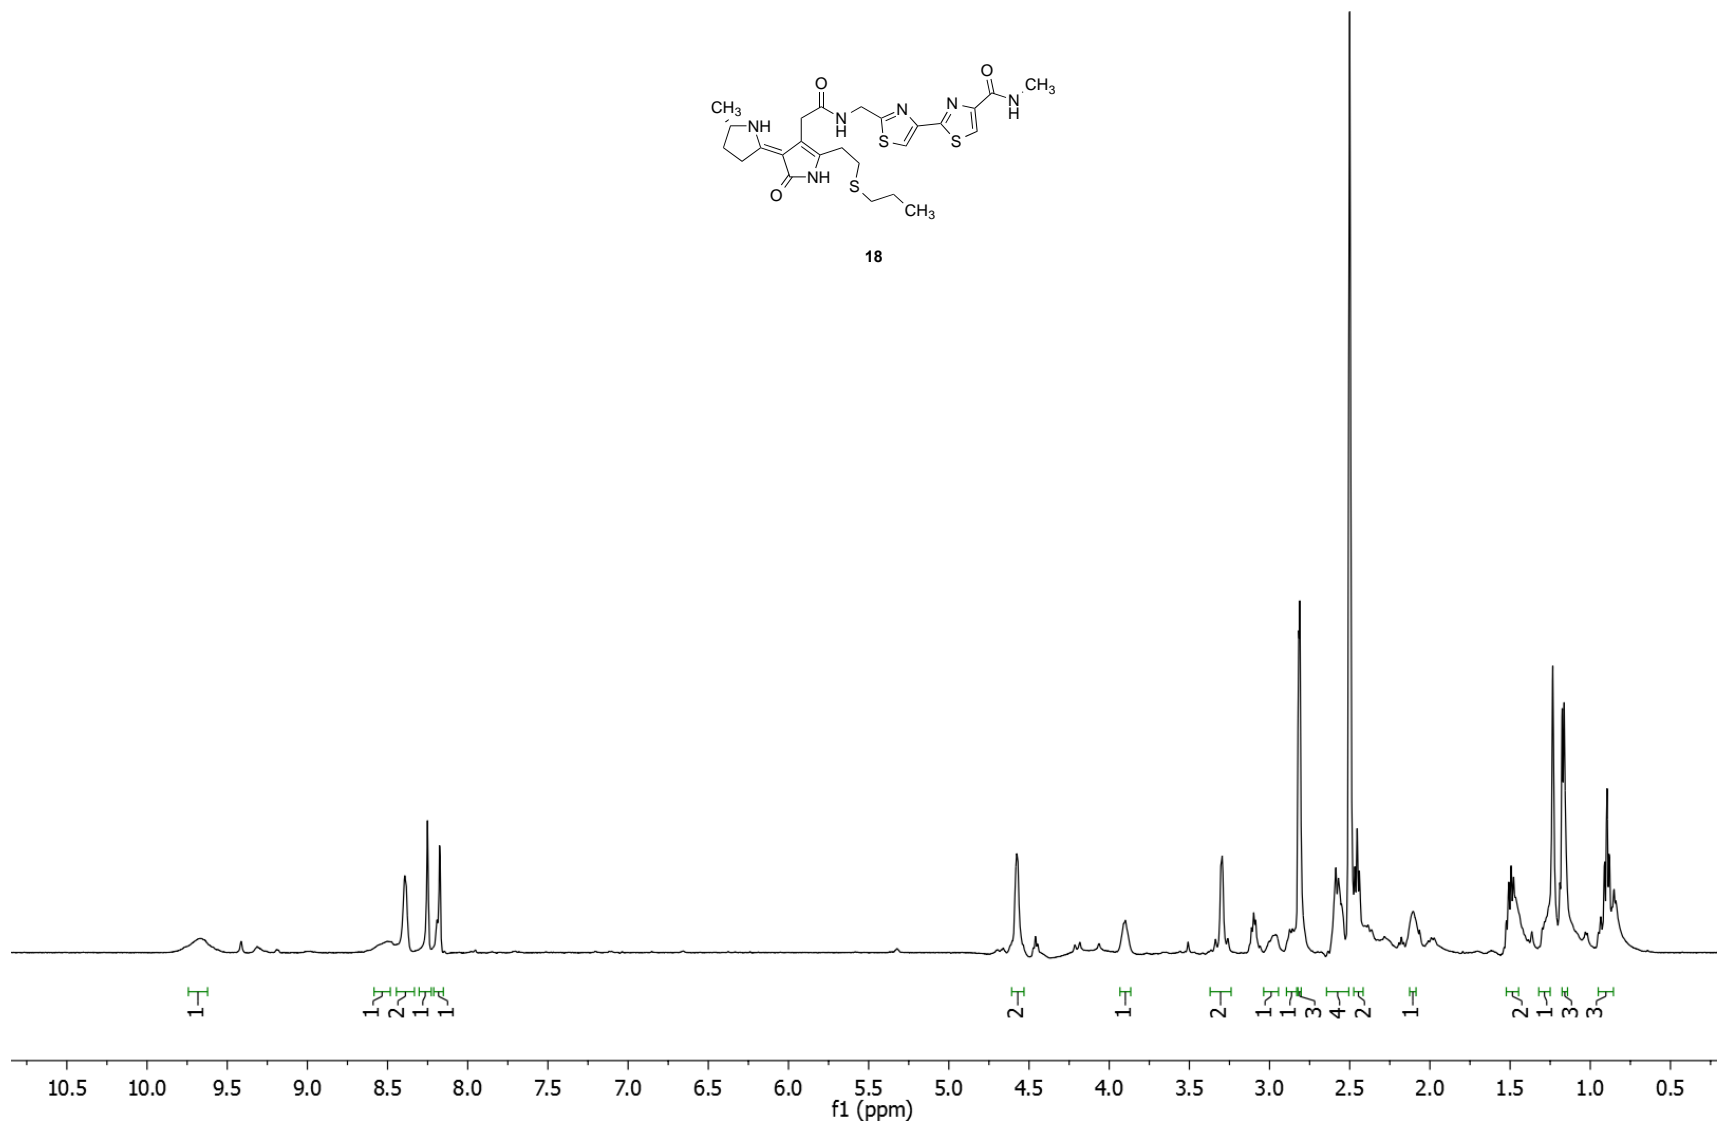

<sup>1</sup>H NMR, 500 MHz, DMSO-*d*<sub>6</sub>

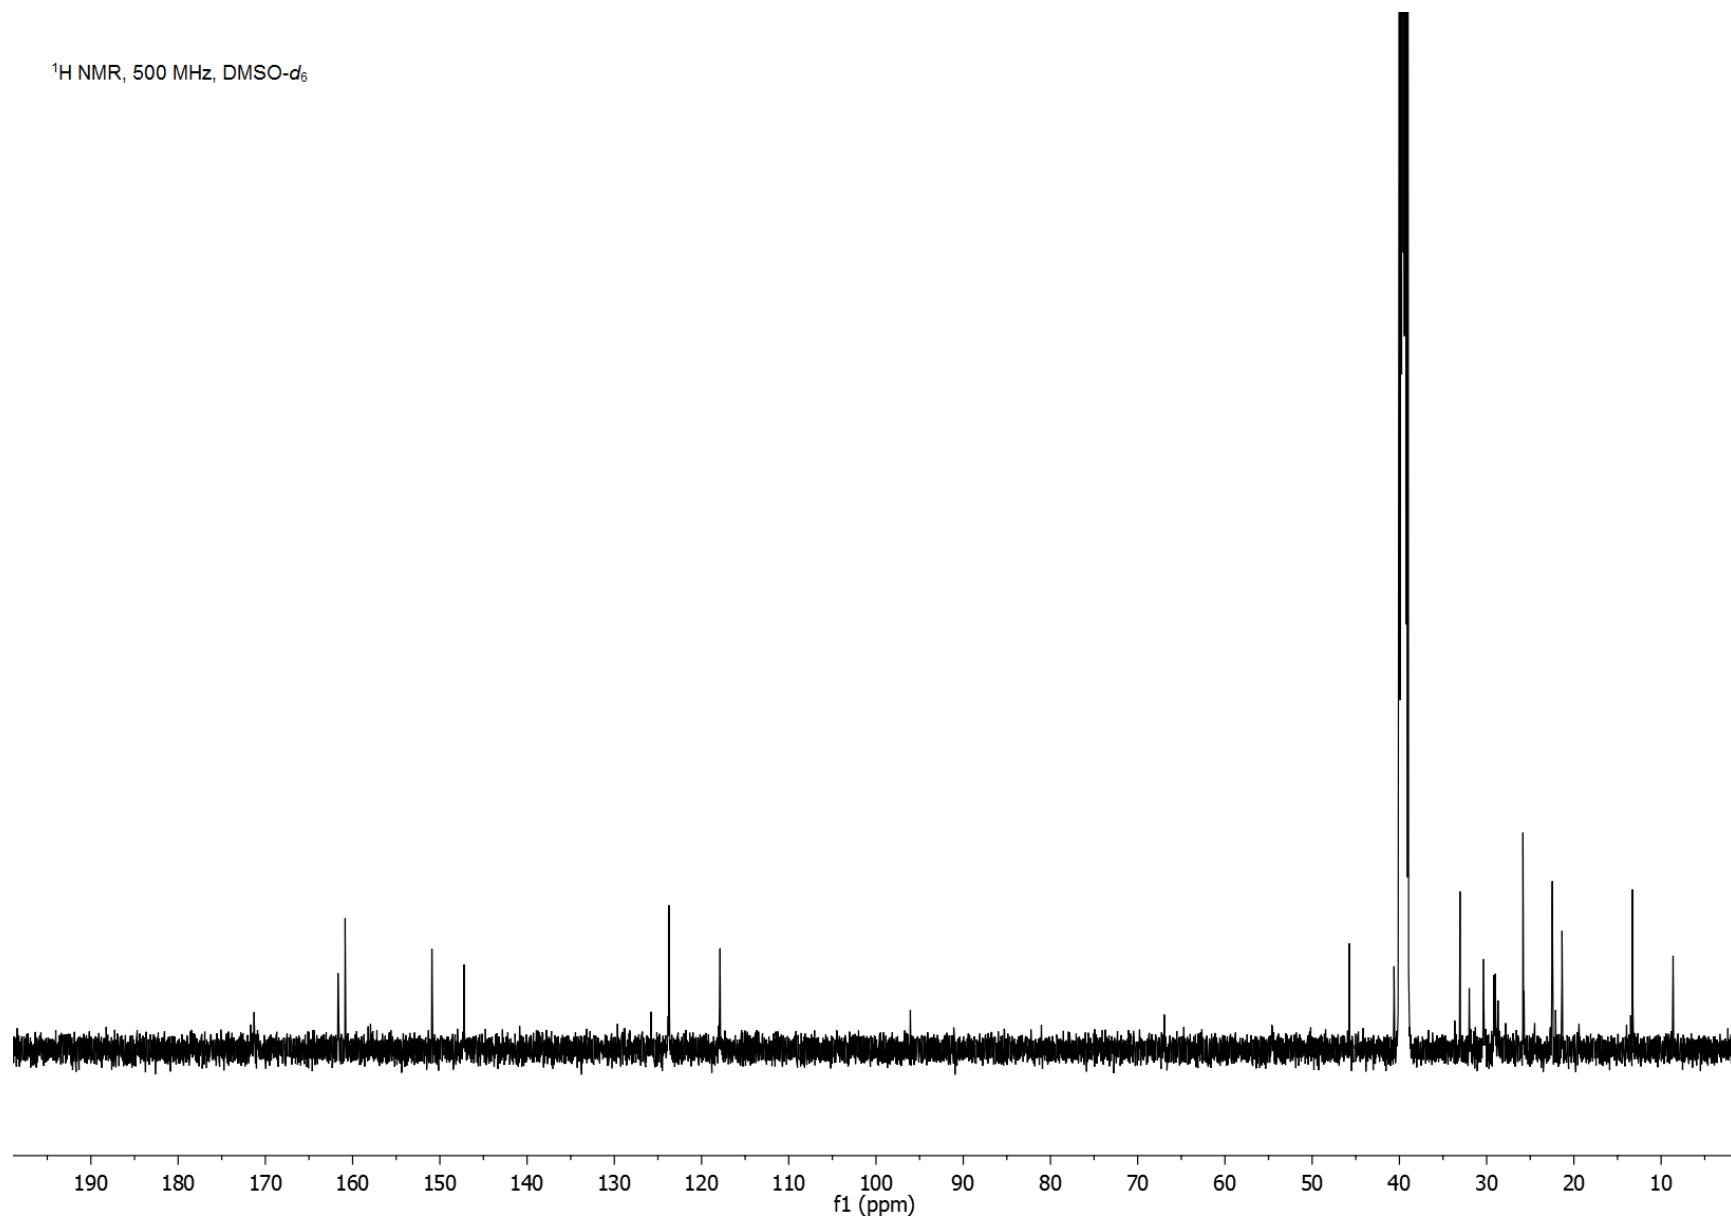

$^1\text{H}$  NMR, 500 MHz,  $\text{CD}_2\text{Cl}_2$

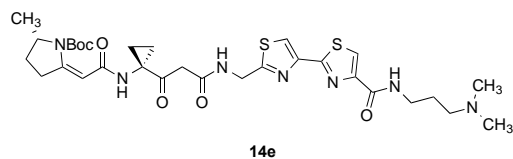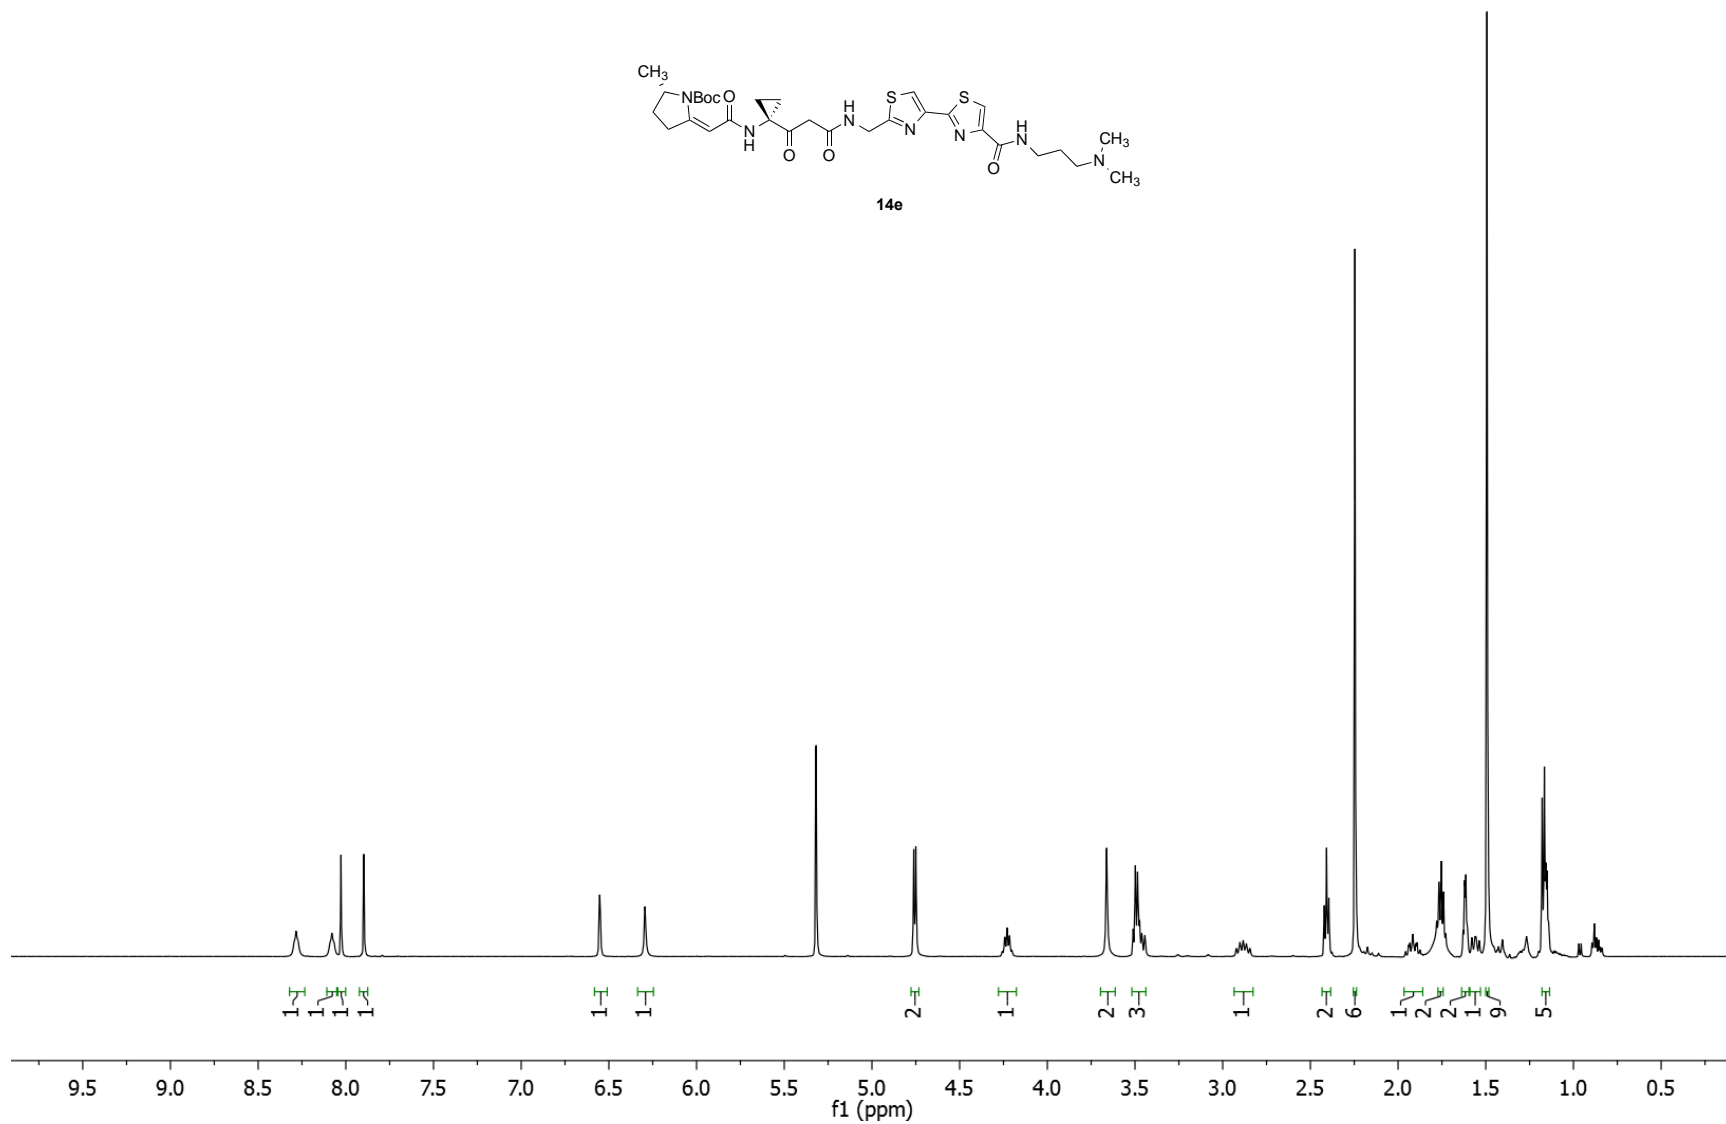

$^{13}\text{C}$  NMR, 125 MHz,  $\text{CD}_2\text{Cl}_2$

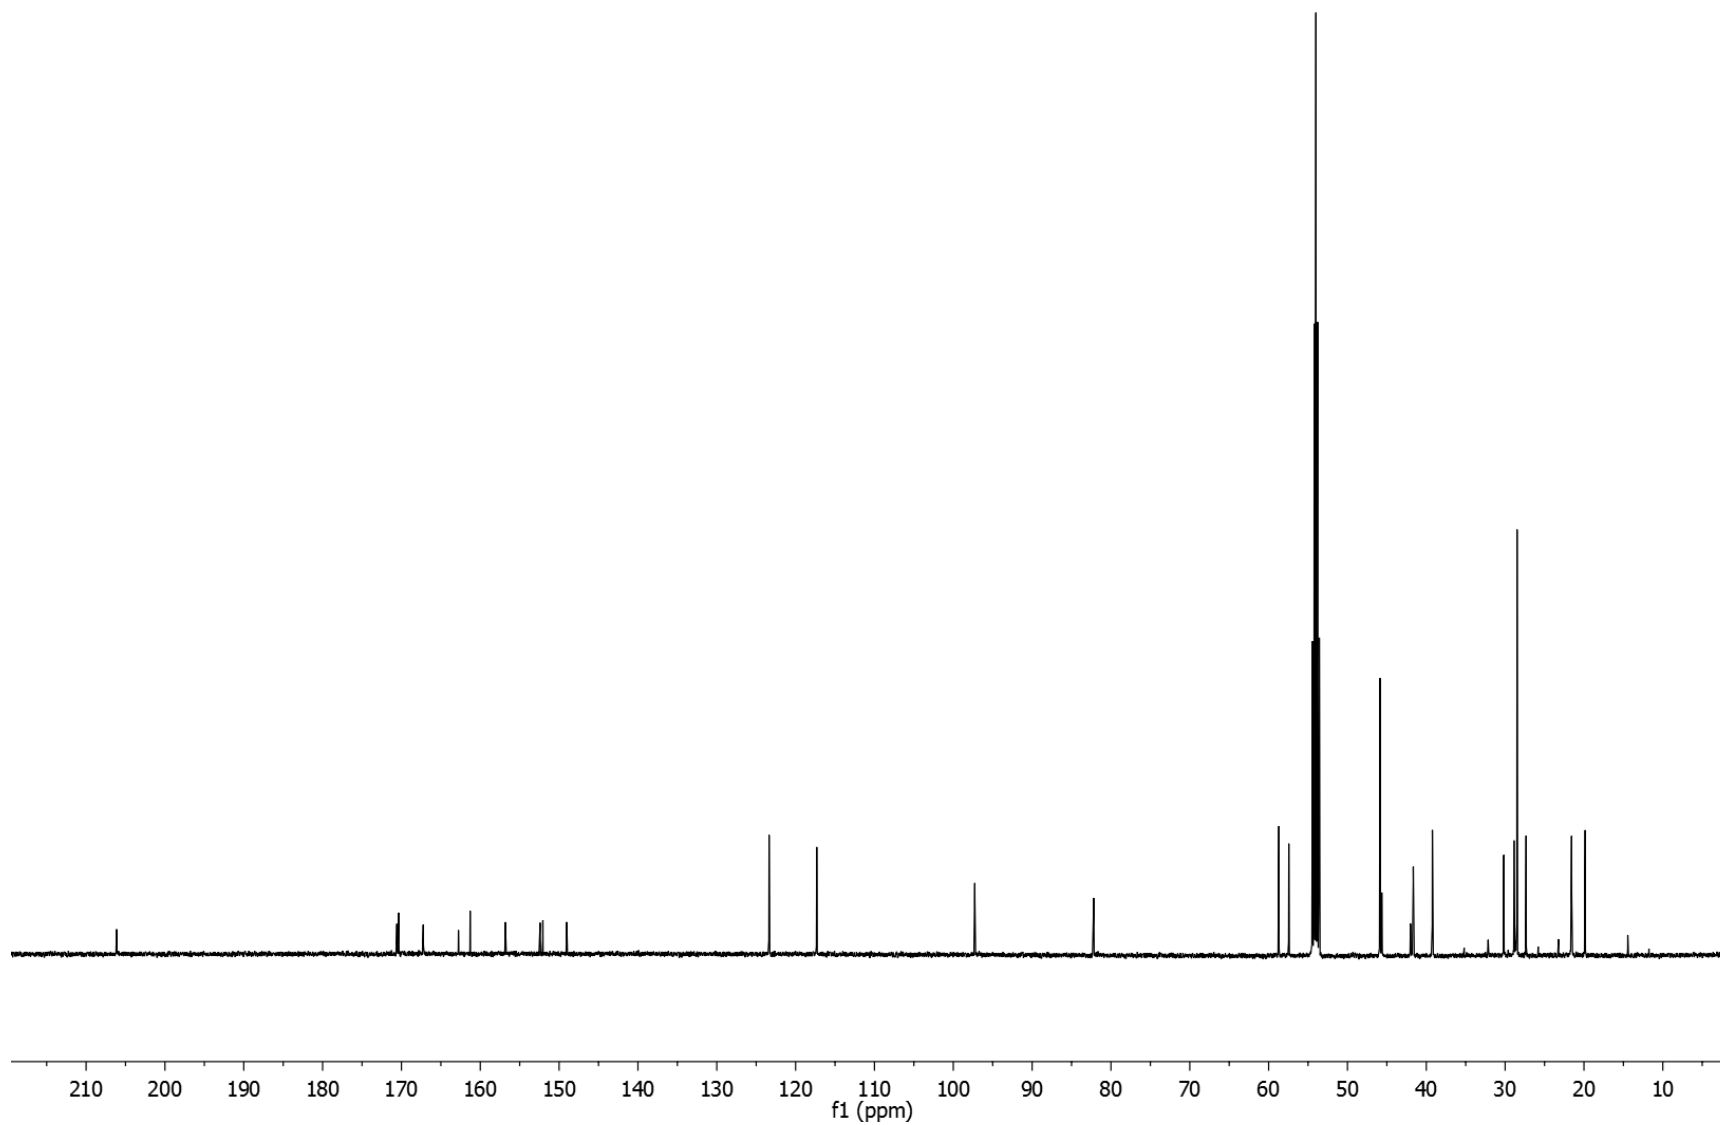

$^1\text{H}$  NMR, 600 MHz,  $\text{CD}_2\text{Cl}_2$

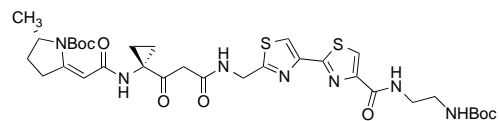

14f

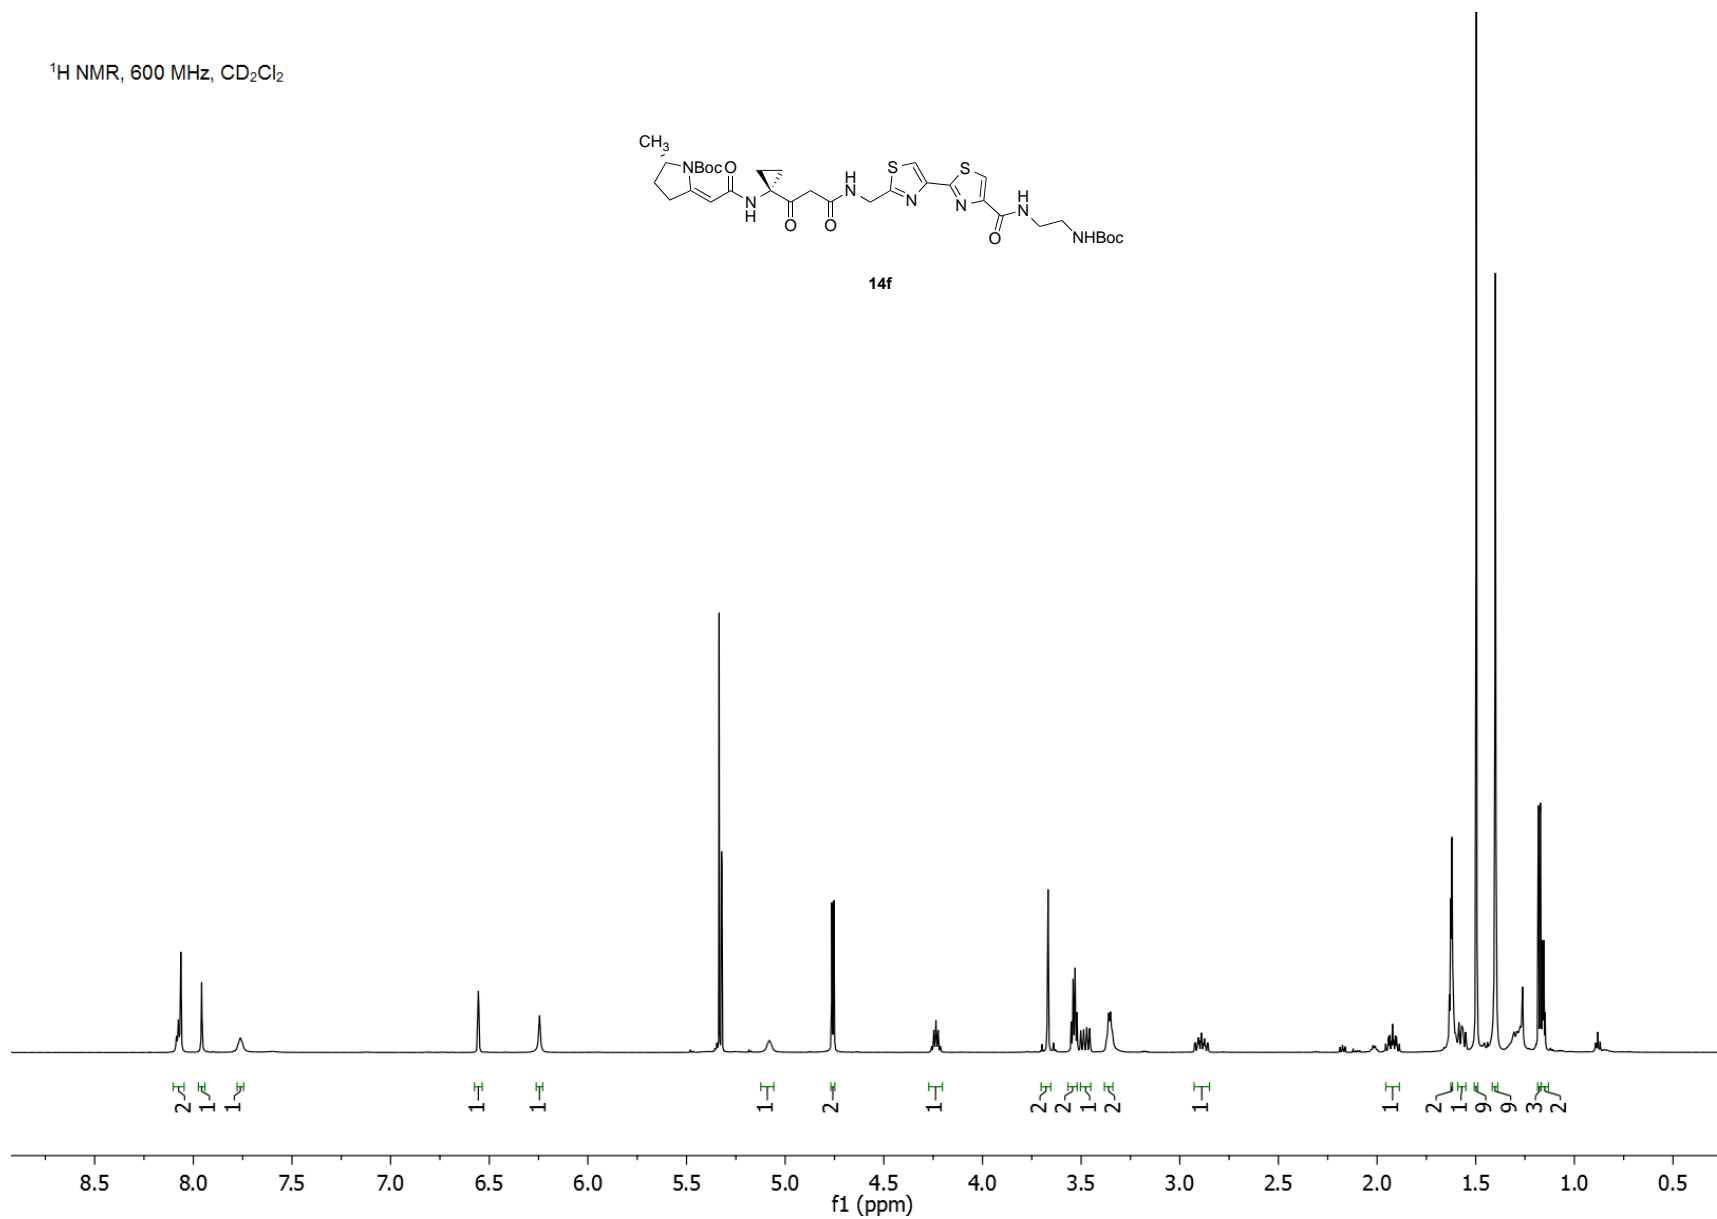

$^{13}\text{C}$  NMR, 150 MHz,  $\text{CD}_2\text{Cl}_2$

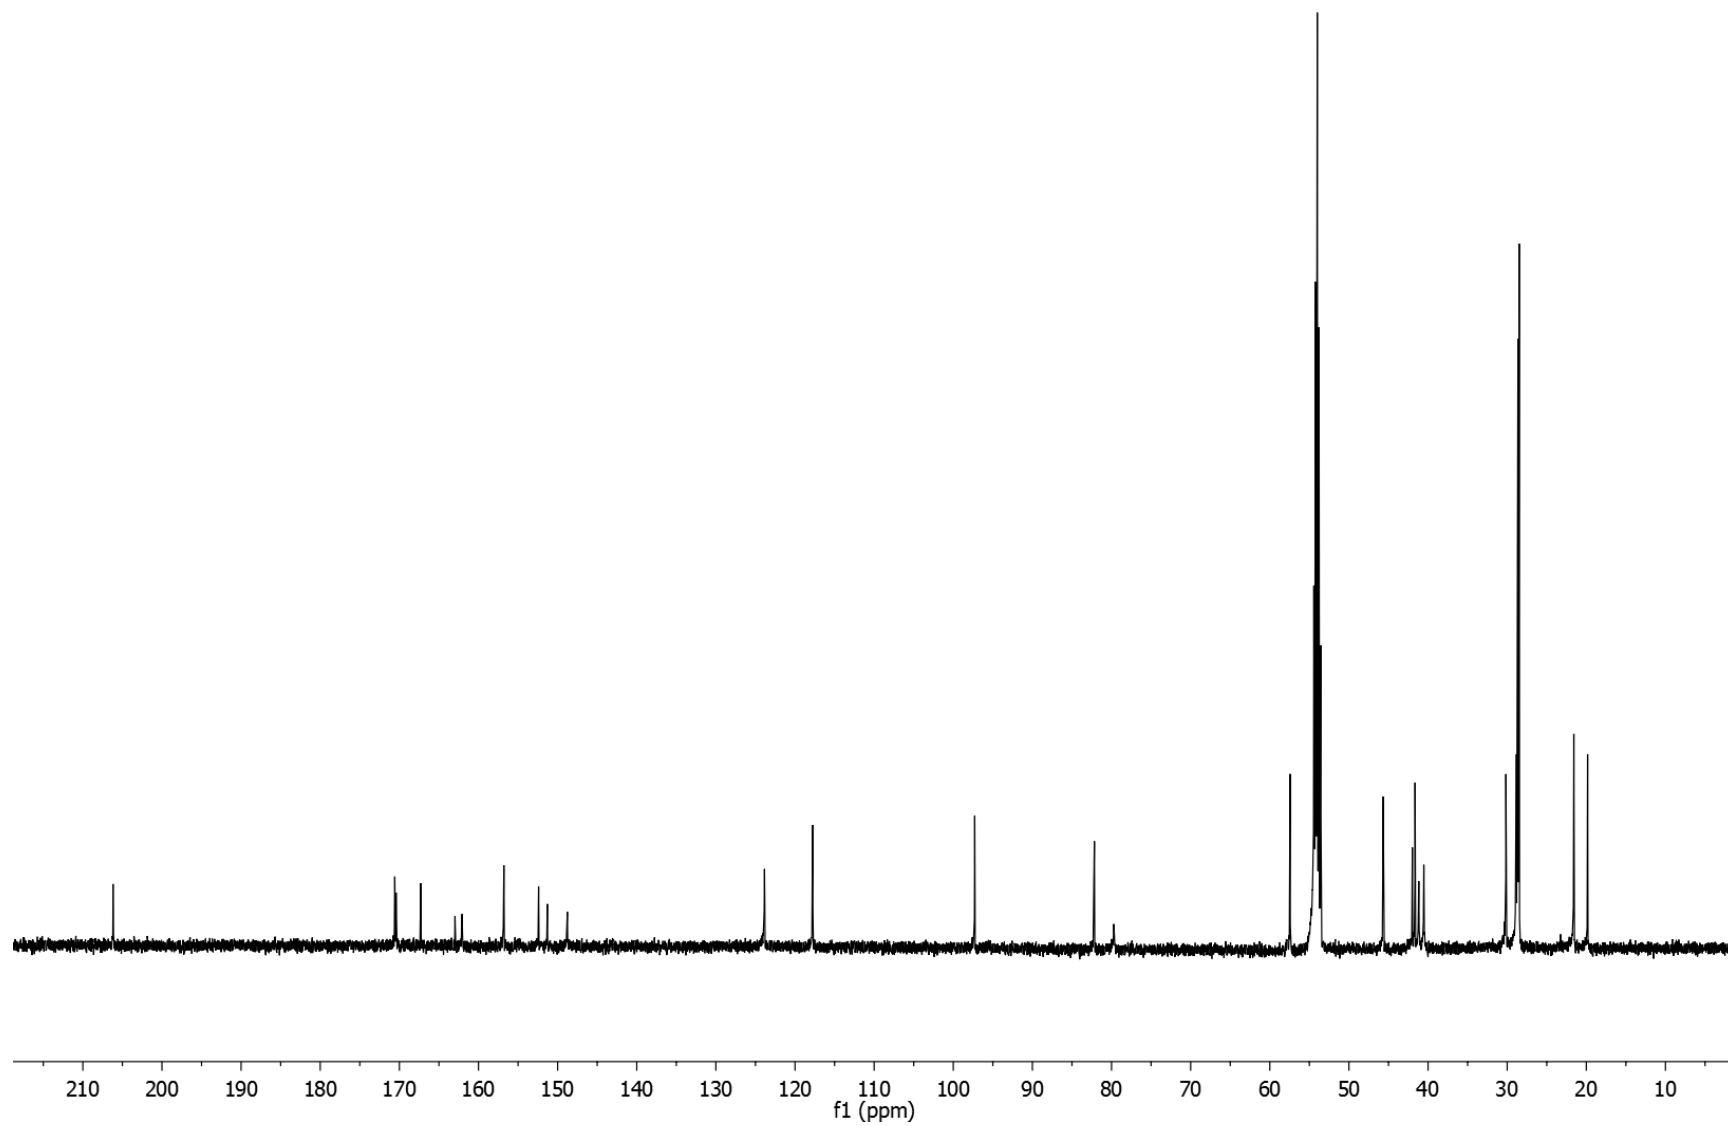

<sup>1</sup>H NMR, 500 MHz, CD<sub>2</sub>Cl<sub>2</sub>

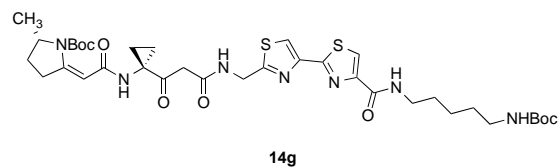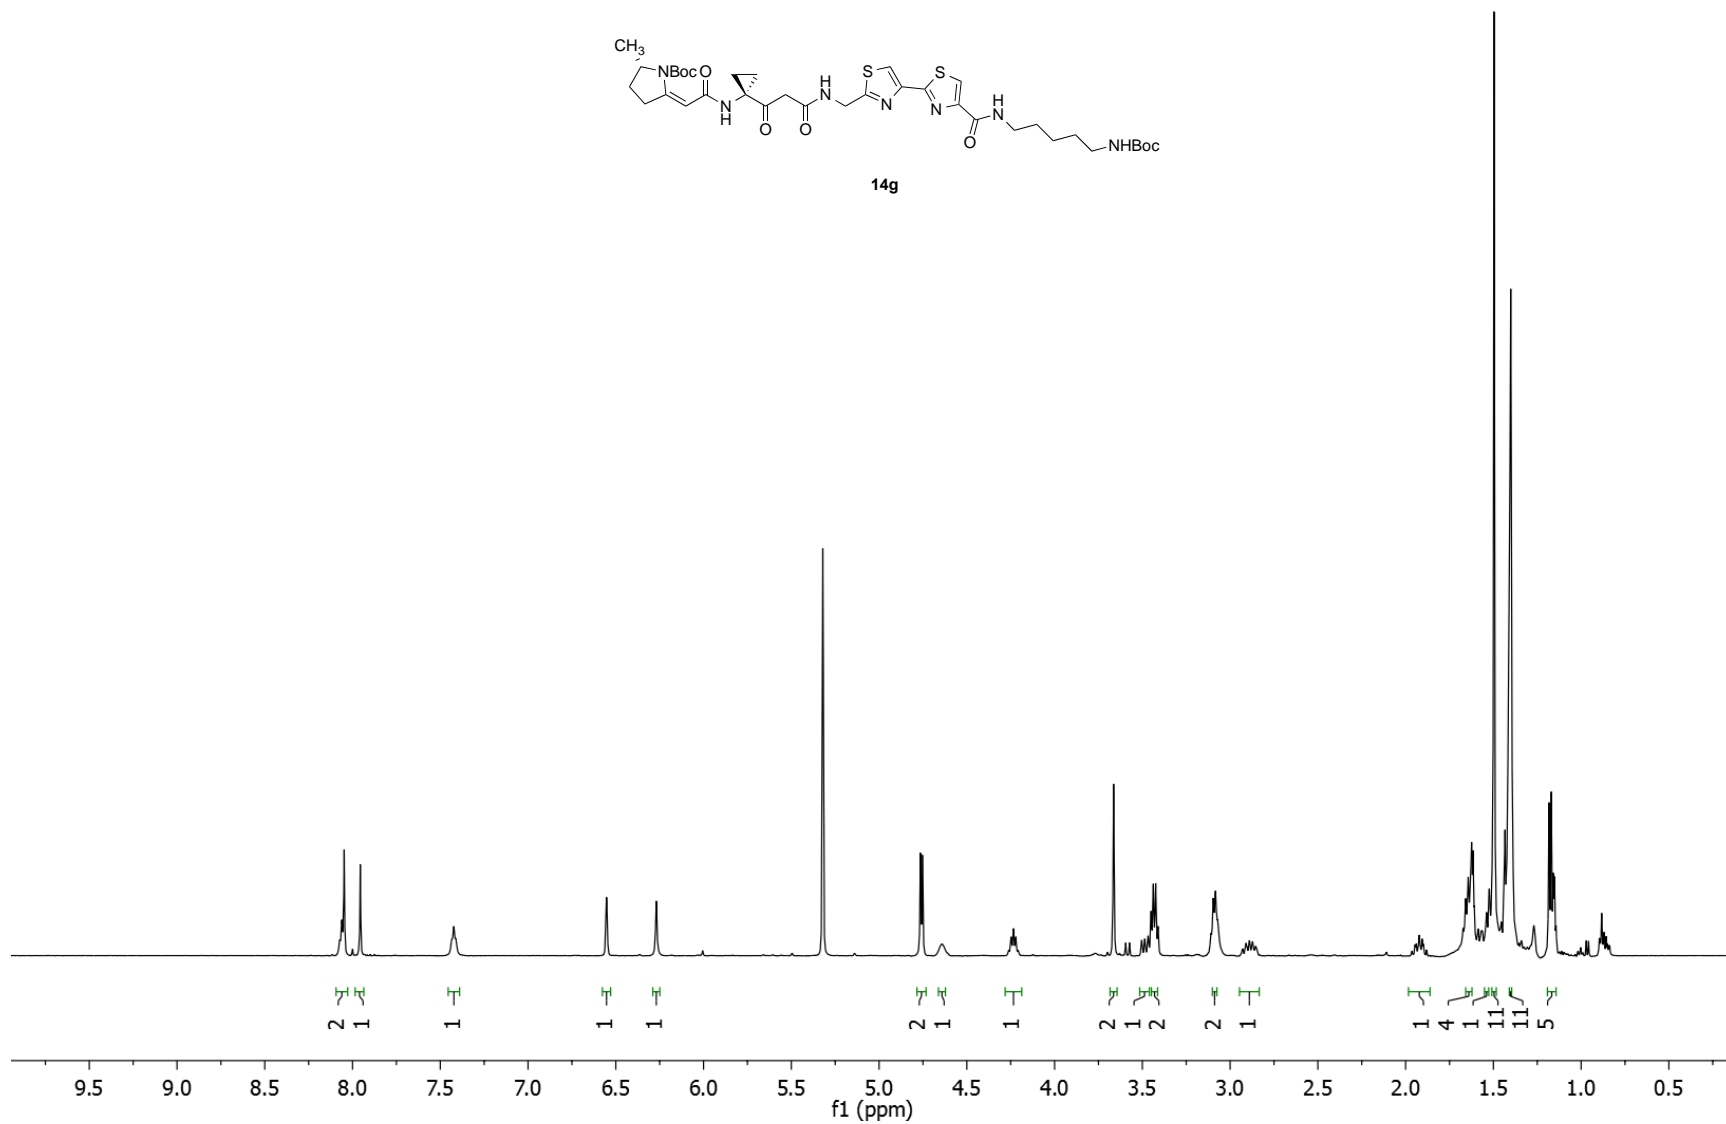



$^{13}\text{C}$  NMR, 125 MHz,  $\text{CD}_2\text{Cl}_2$

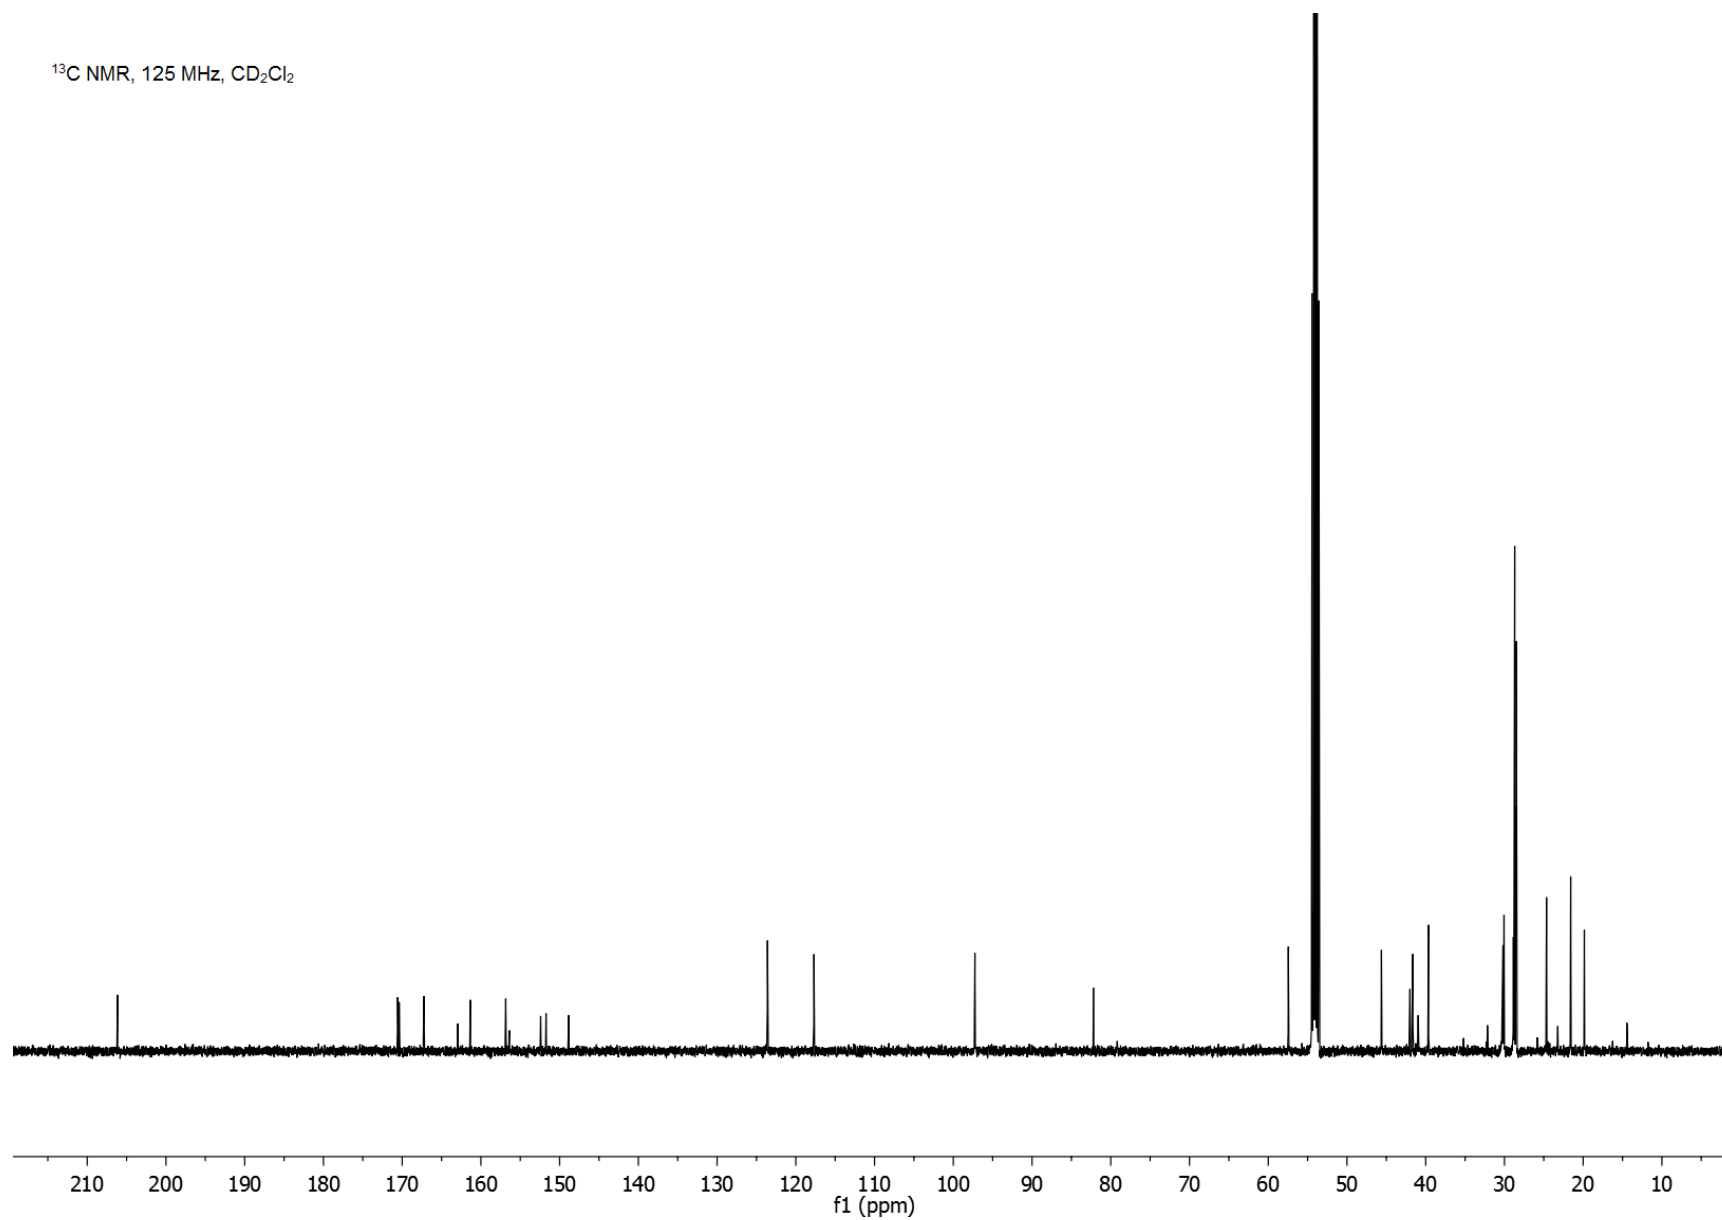

$^1\text{H}$  NMR, 500 MHz,  $\text{CD}_2\text{Cl}_2$

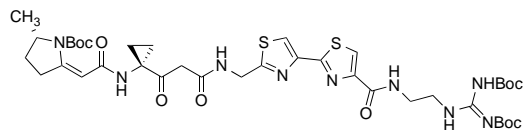

14h

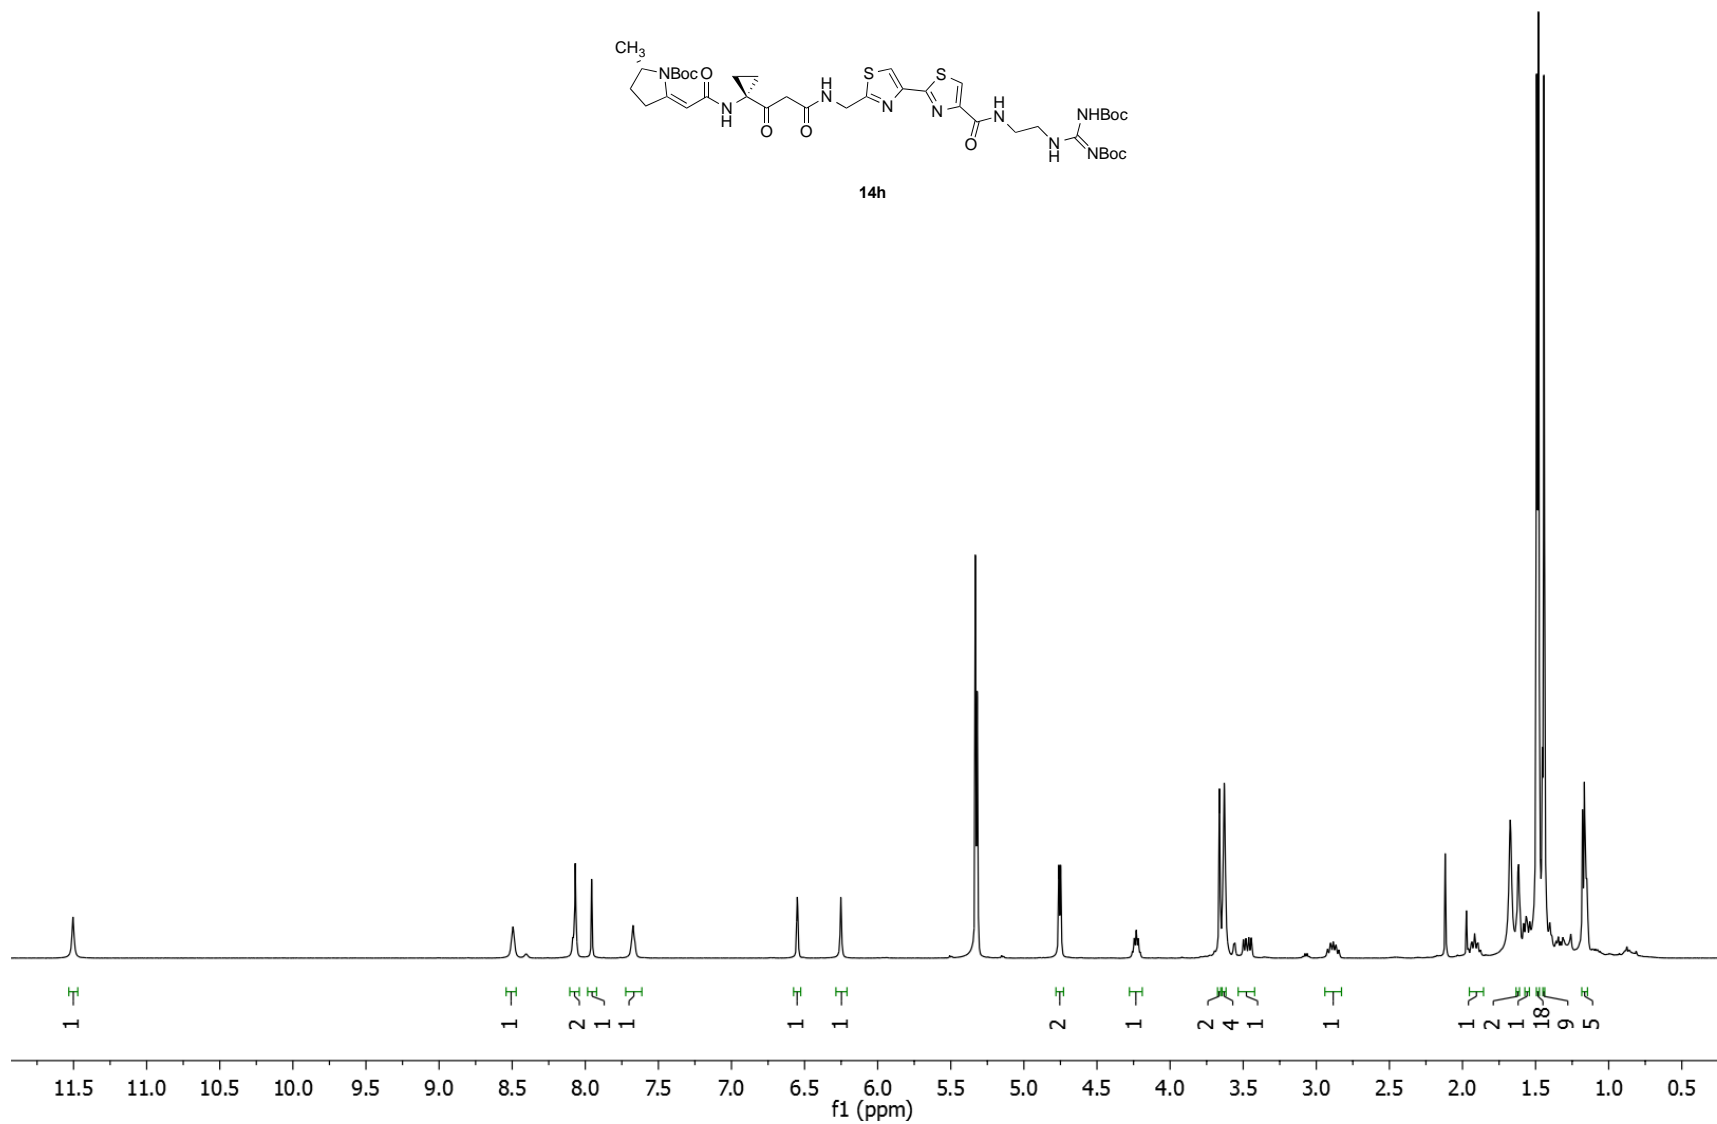

$^{13}\text{C}$  NMR, 125 MHz,  $\text{CD}_2\text{Cl}_2$

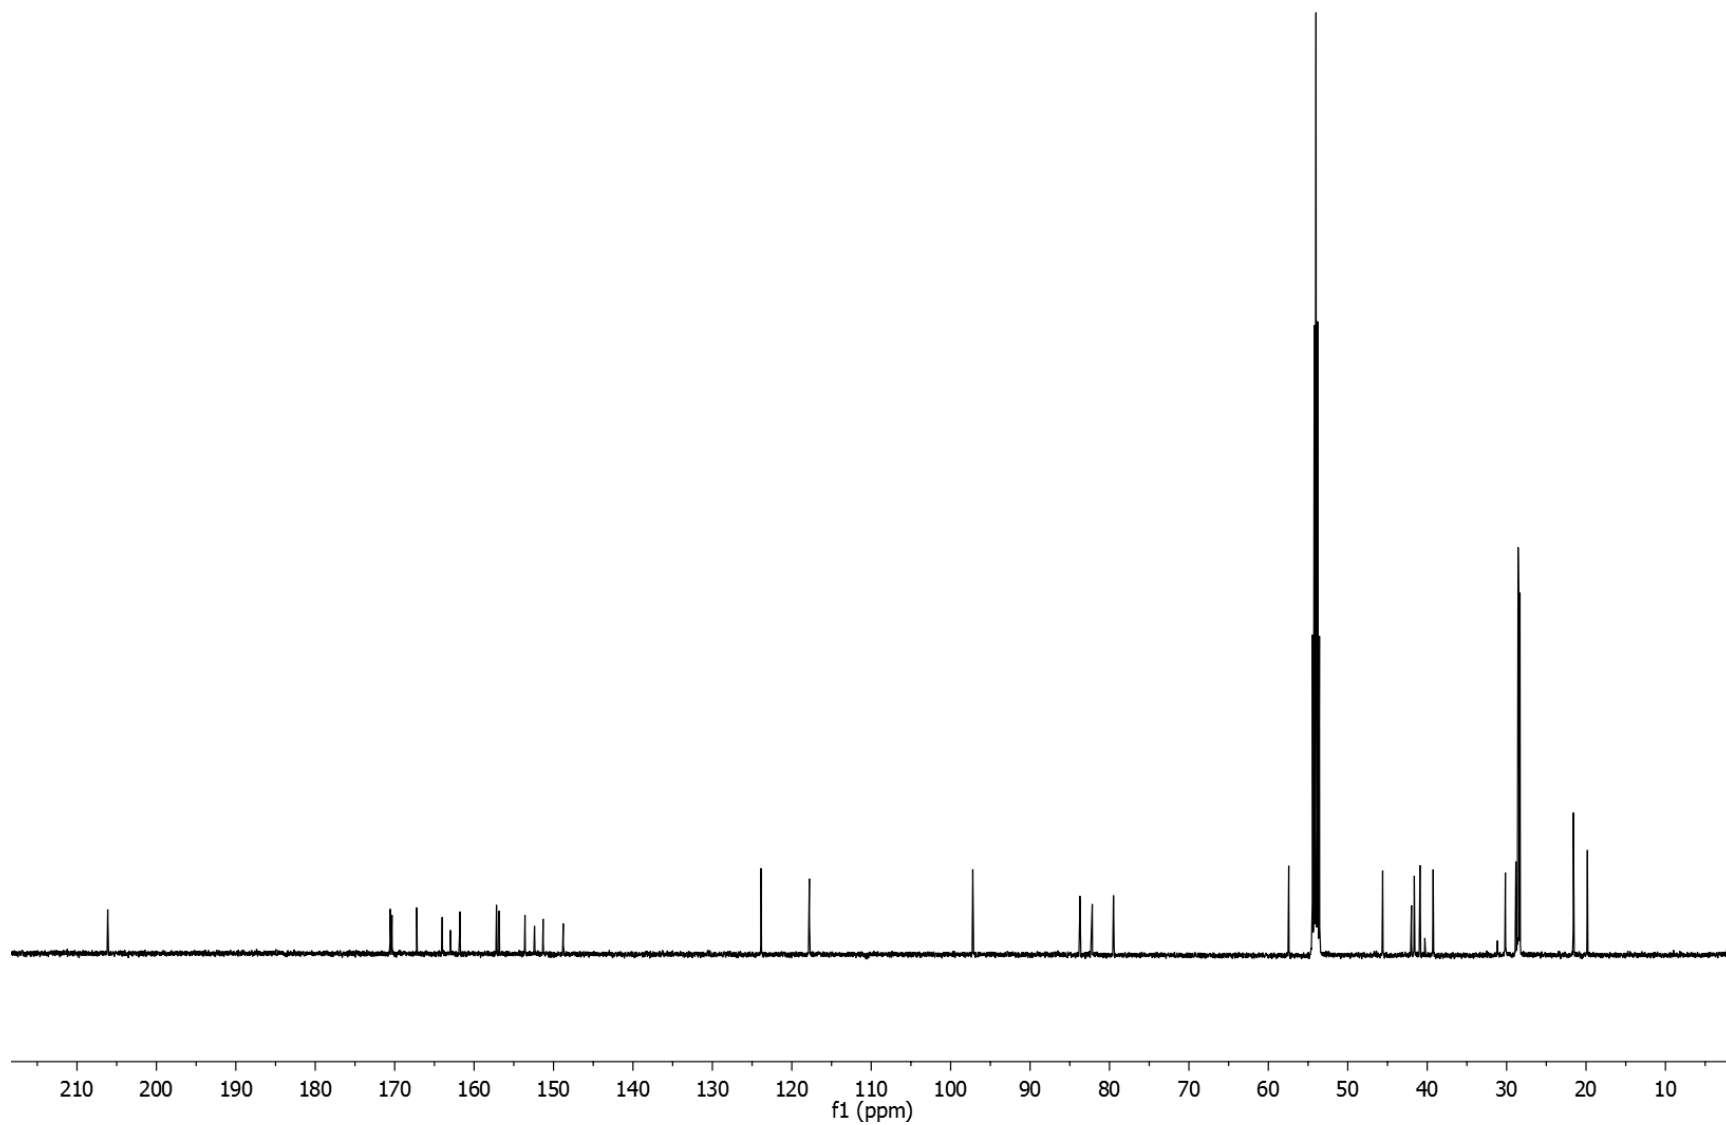

$^1\text{H}$  NMR, 600 MHz,  $\text{CD}_2\text{Cl}_2$

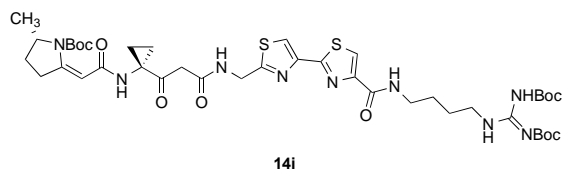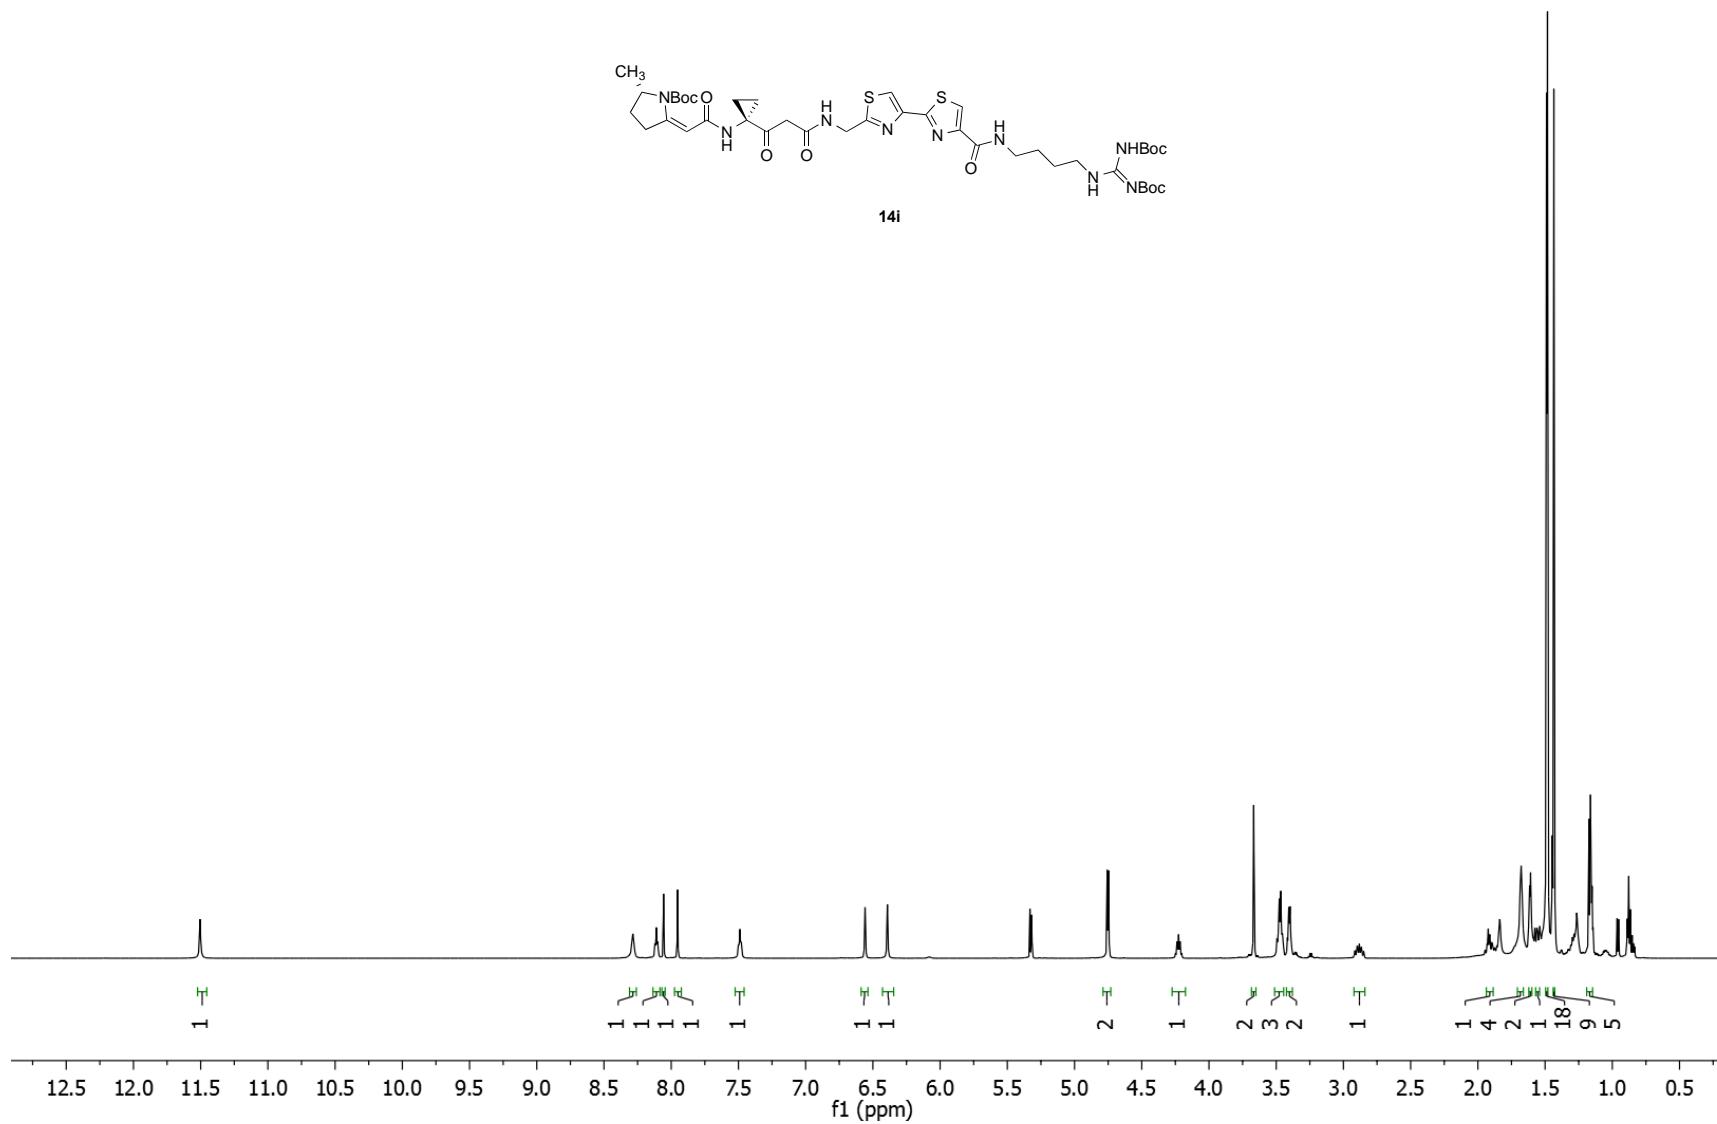

$^{13}\text{C}$  NMR, 150 MHz,  $\text{CD}_2\text{Cl}_2$

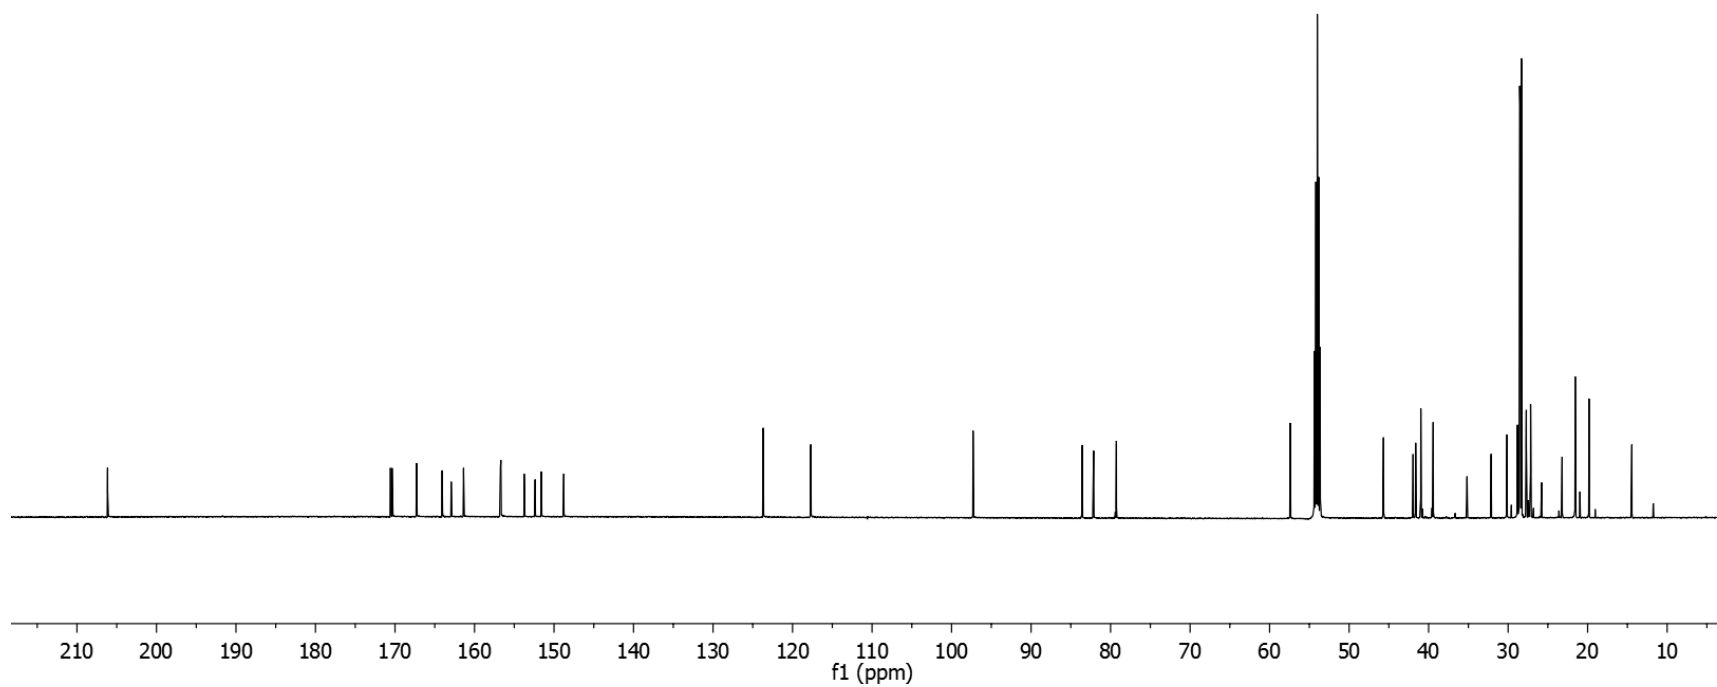

<sup>1</sup>H NMR, 500 MHz, DMSO-*d*<sub>6</sub>

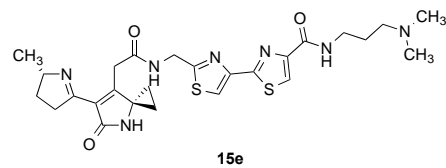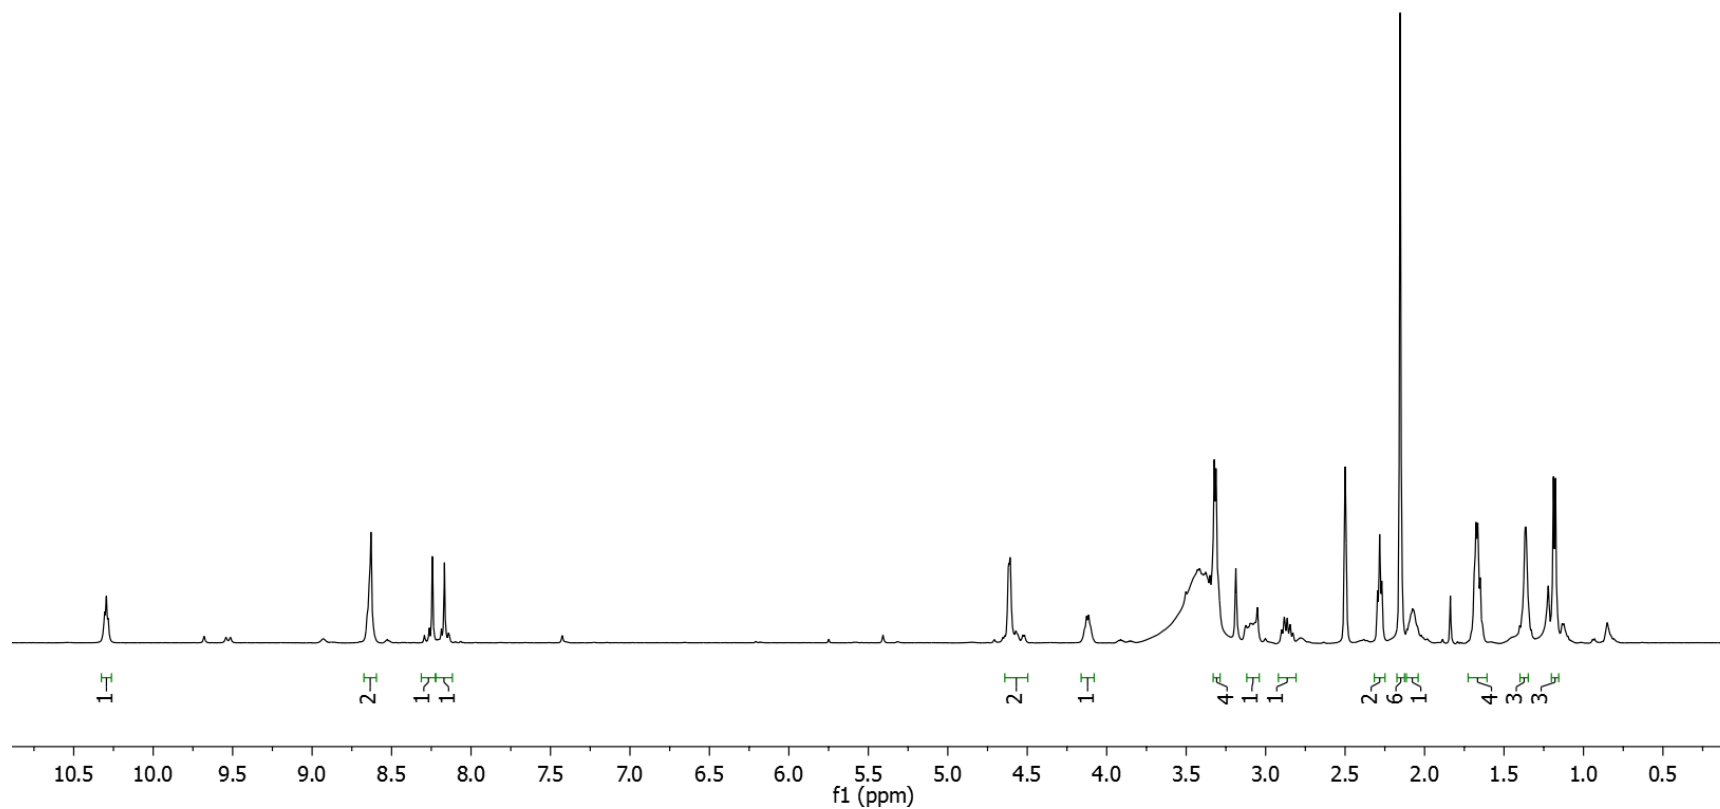

$^{13}\text{C}$  NMR, 125 MHz,  $\text{DMSO-}d_6$

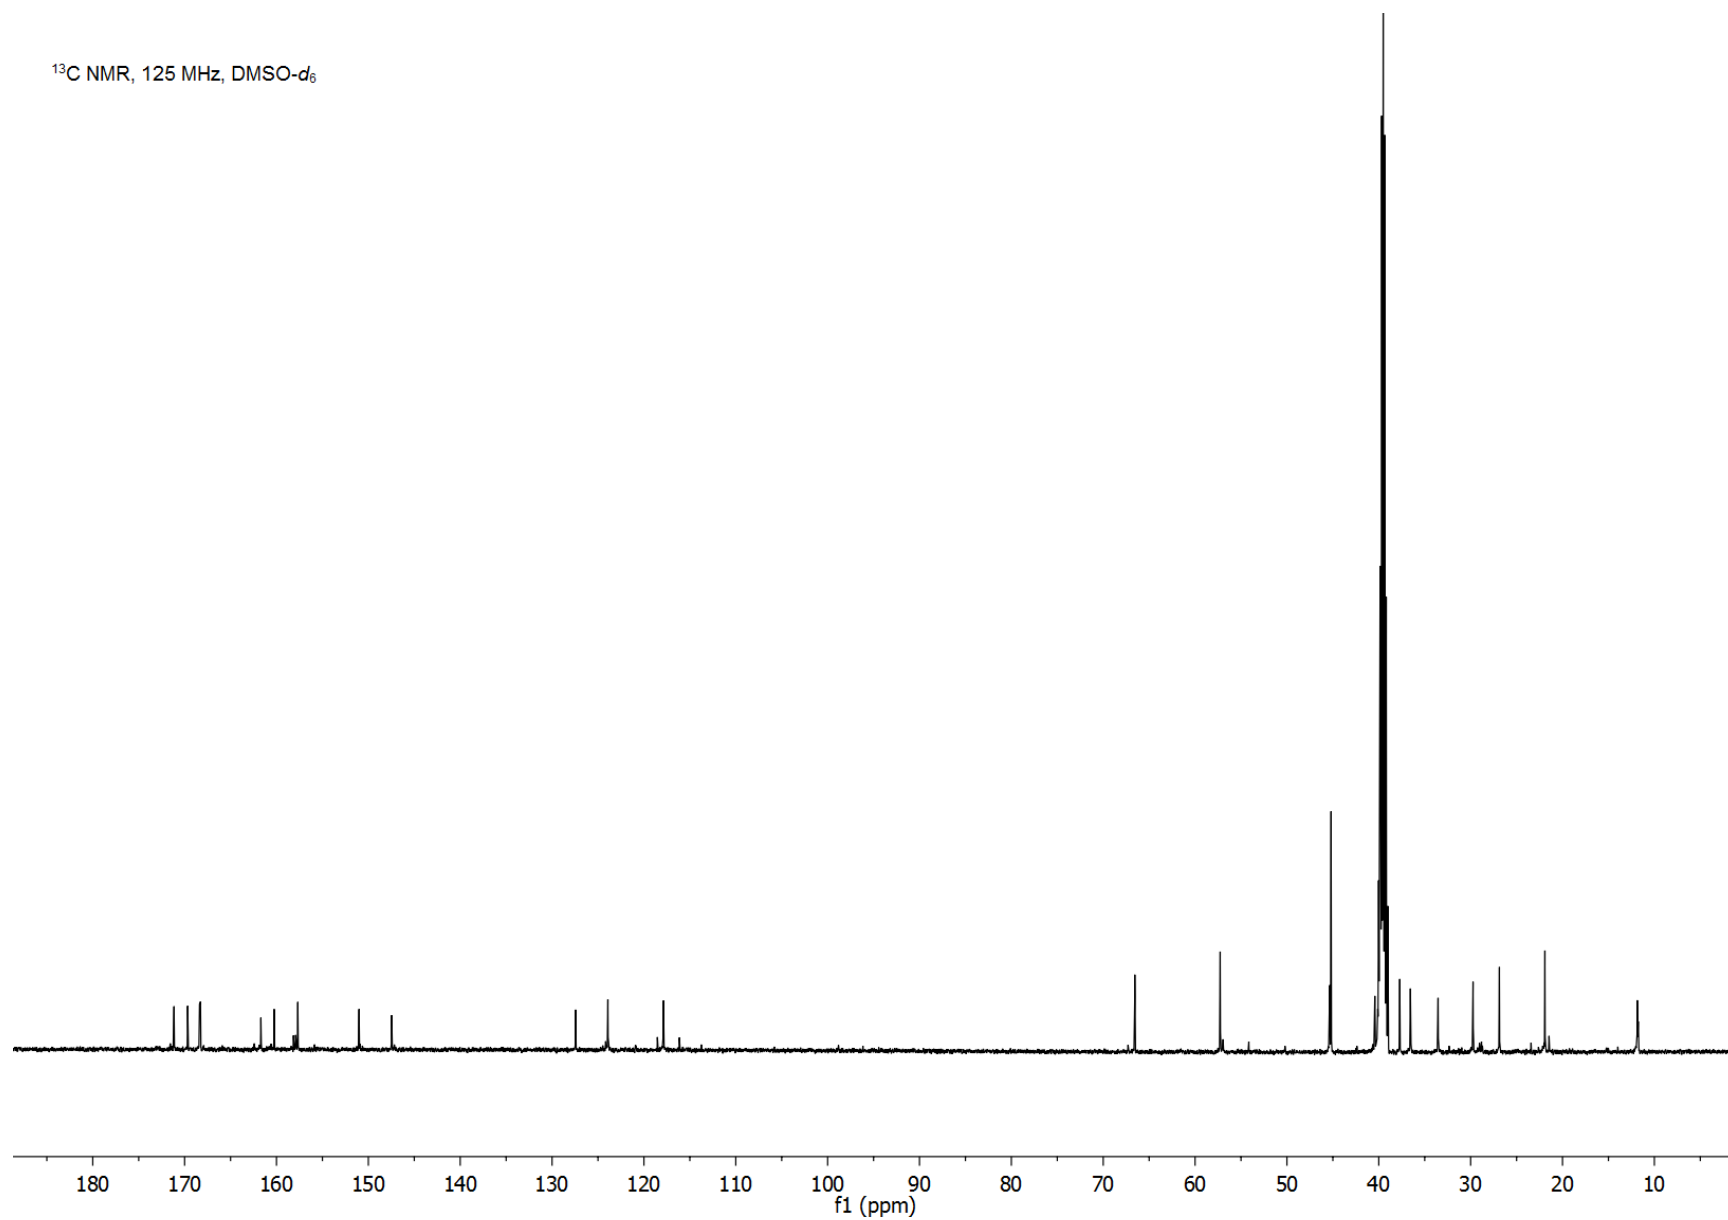

$^1\text{H}$  NMR, 500 MHz,  $\text{DMSO-}d_6$

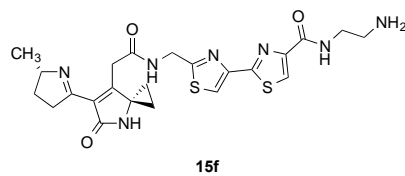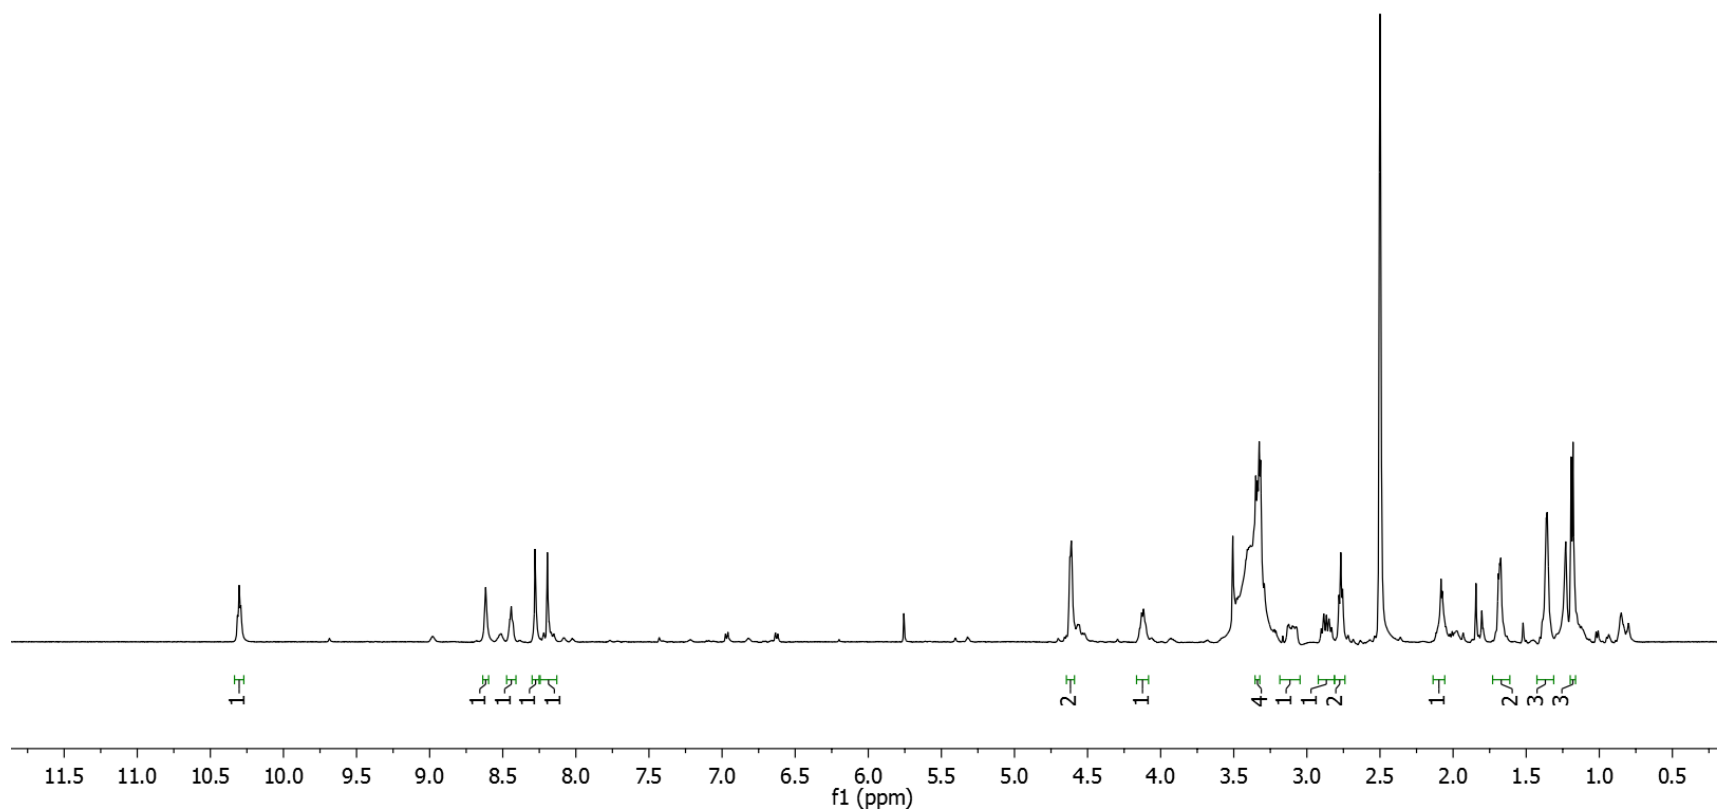



$^{13}\text{C}$  NMR, 125 MHz,  $\text{DMSO-}d_6$

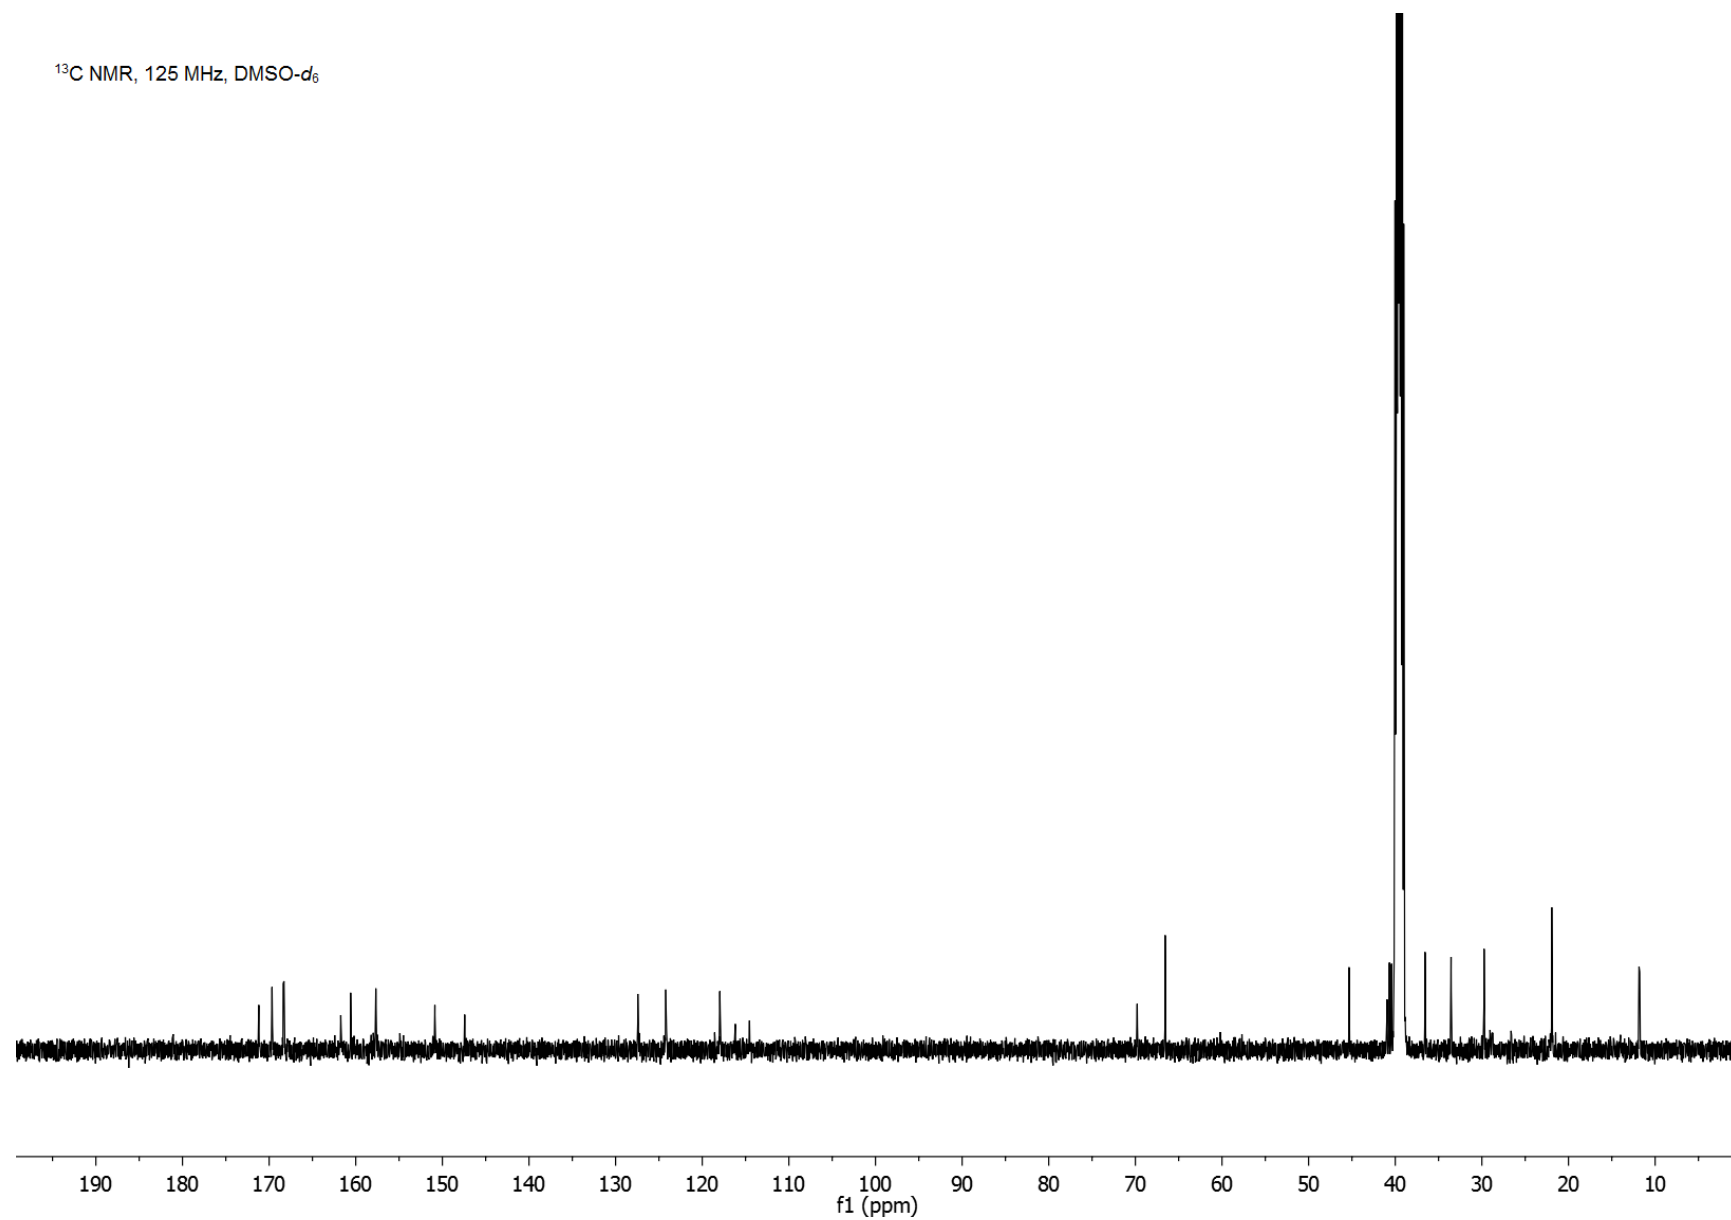

$^1\text{H}$  NMR, 500 MHz,  $\text{DMSO-}d_6$

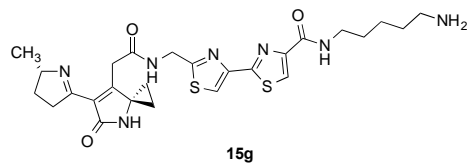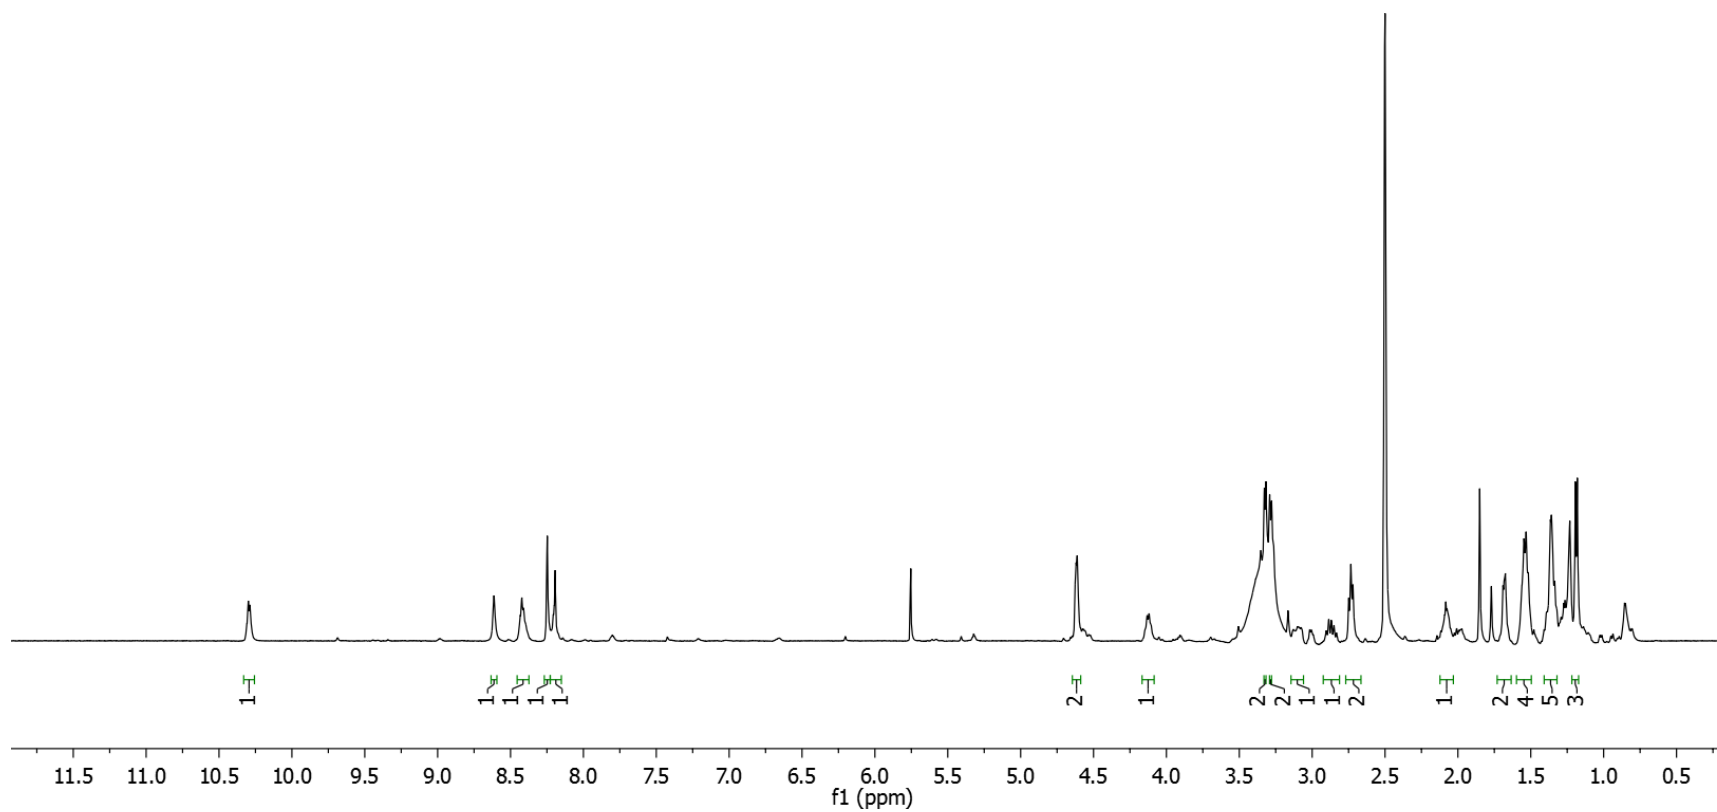

$^{13}\text{C}$  NMR, 125 MHz,  $\text{DMSO-}d_6$

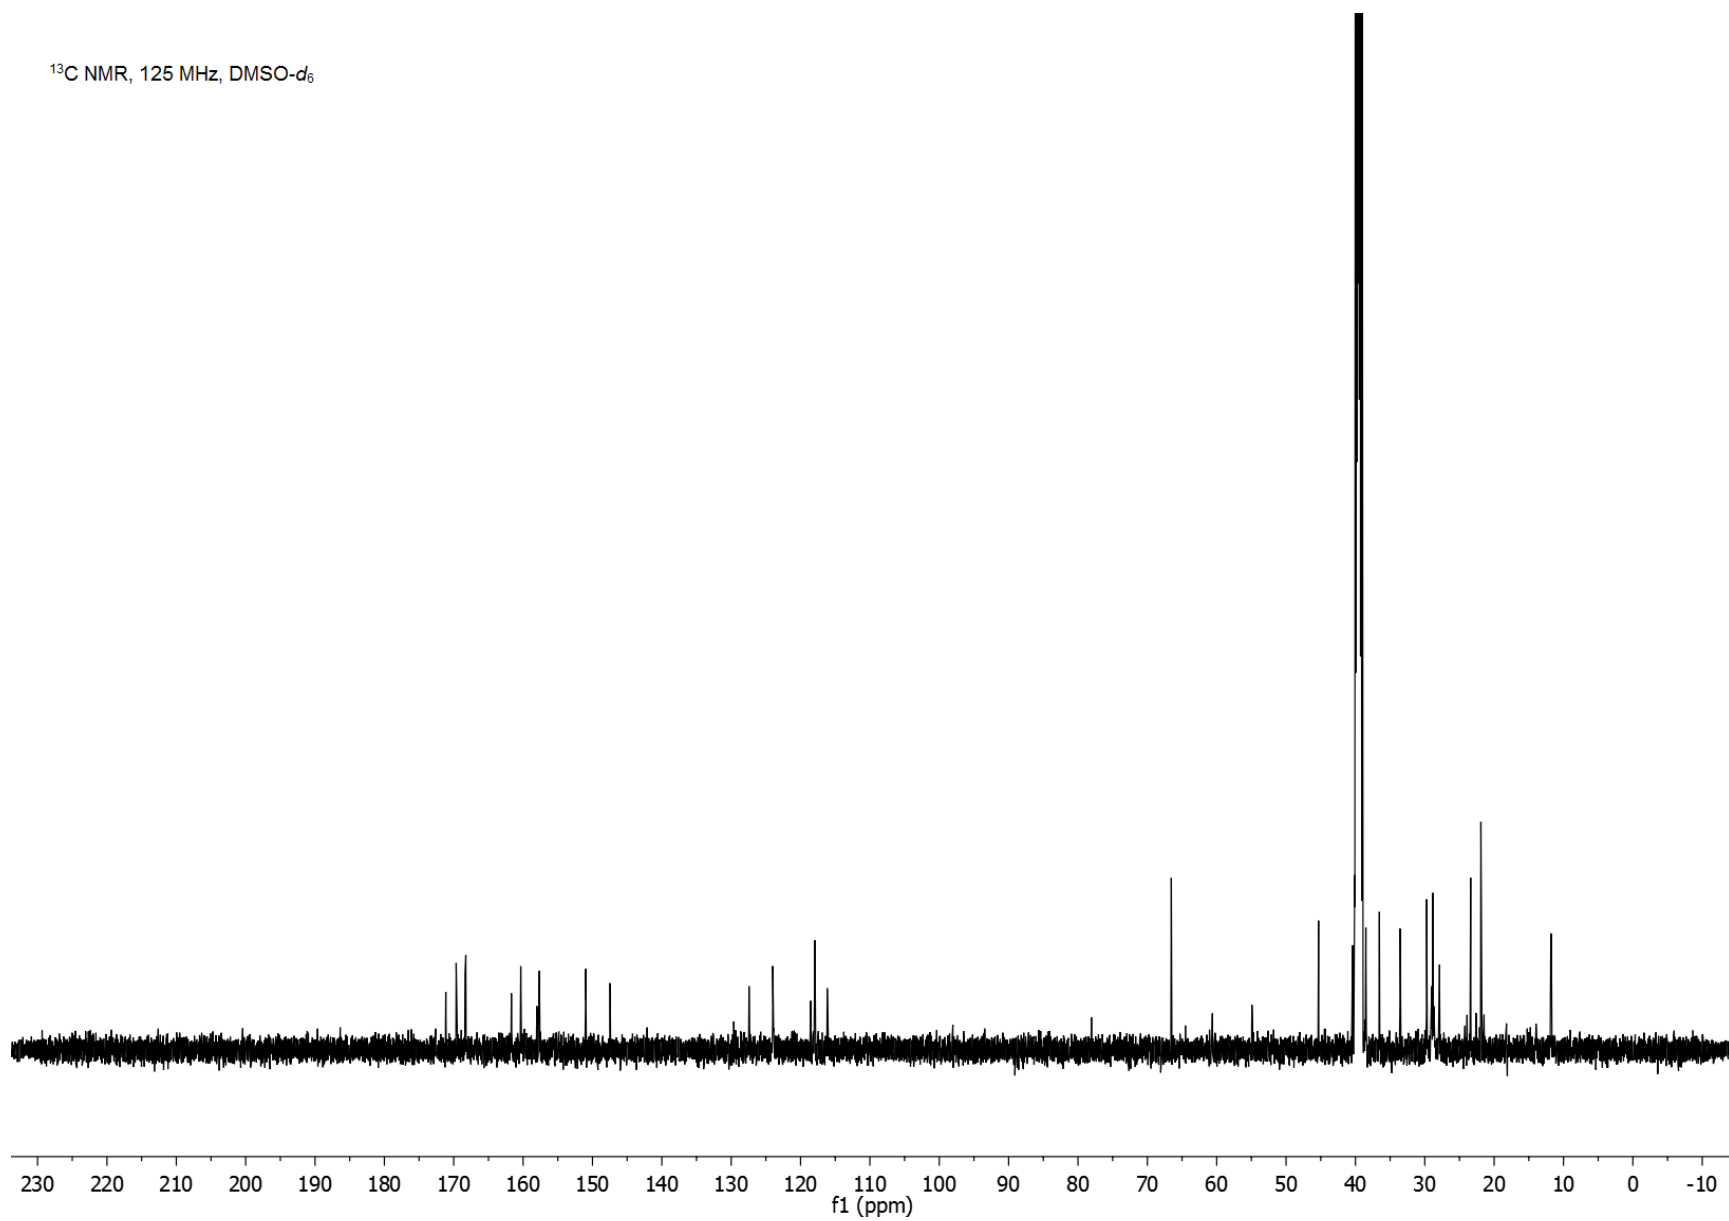

$^1\text{H}$  NMR, 600 MHz,  $\text{DMSO-}d_6$

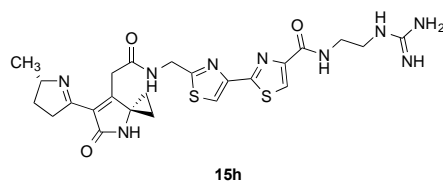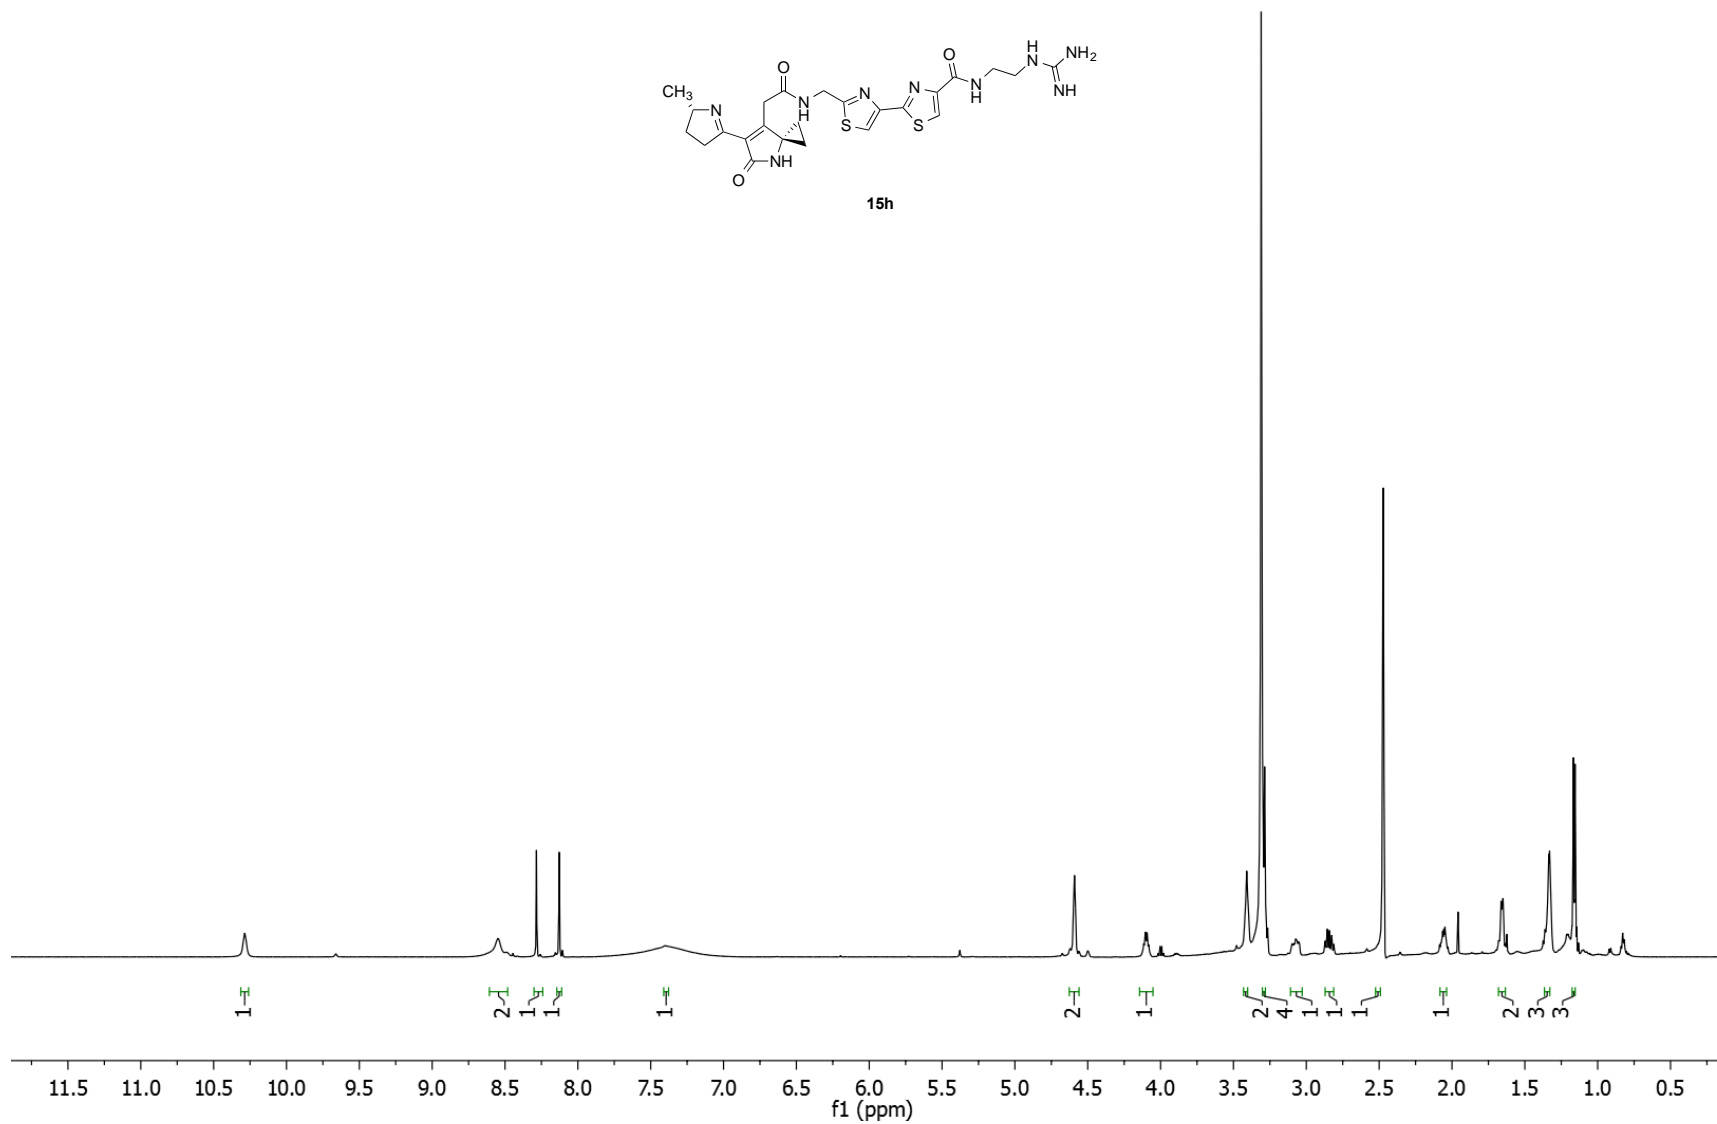

$^{13}\text{C}$  NMR, 150 MHz,  $\text{DMSO-}d_6$

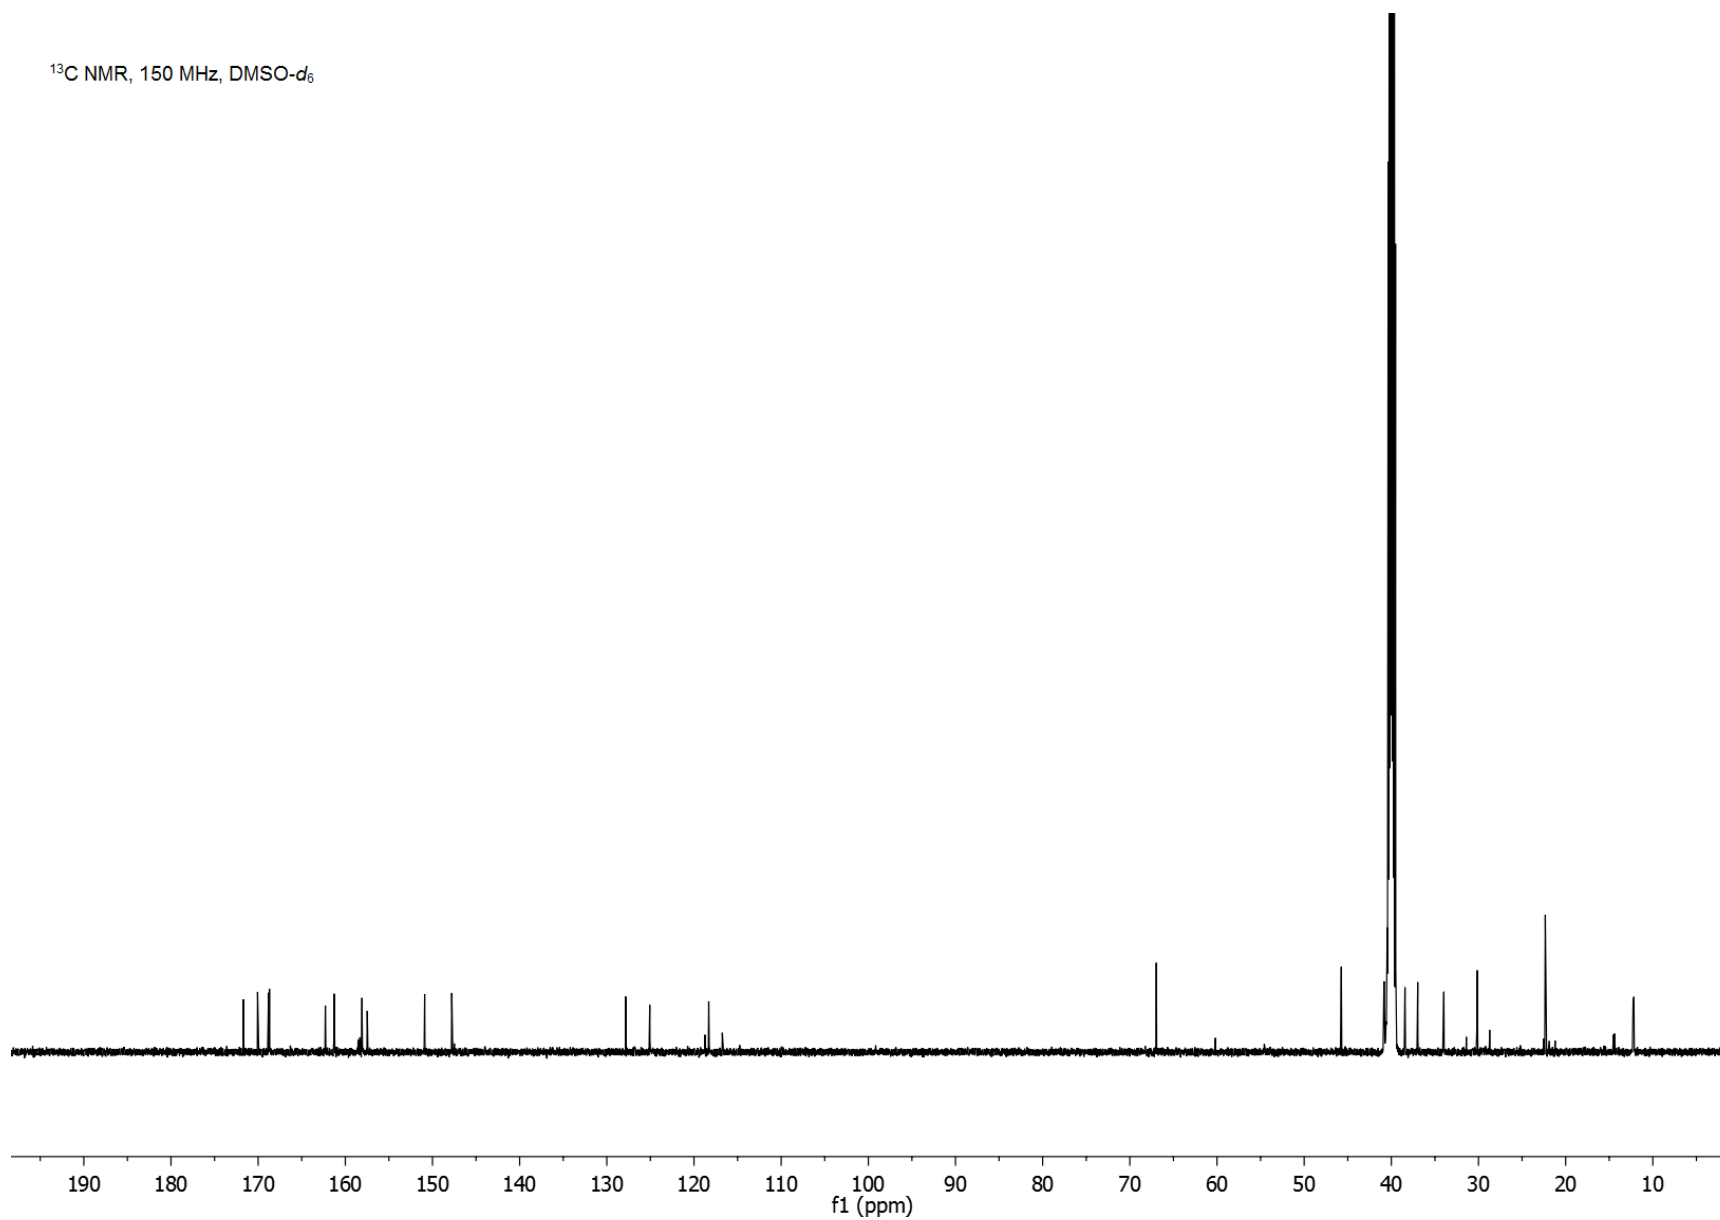

<sup>1</sup>H NMR, 500 MHz, DMSO-*d*<sub>6</sub>

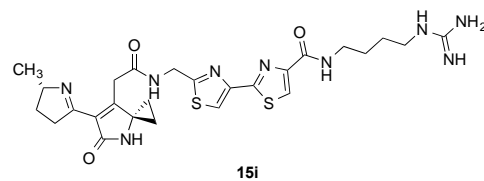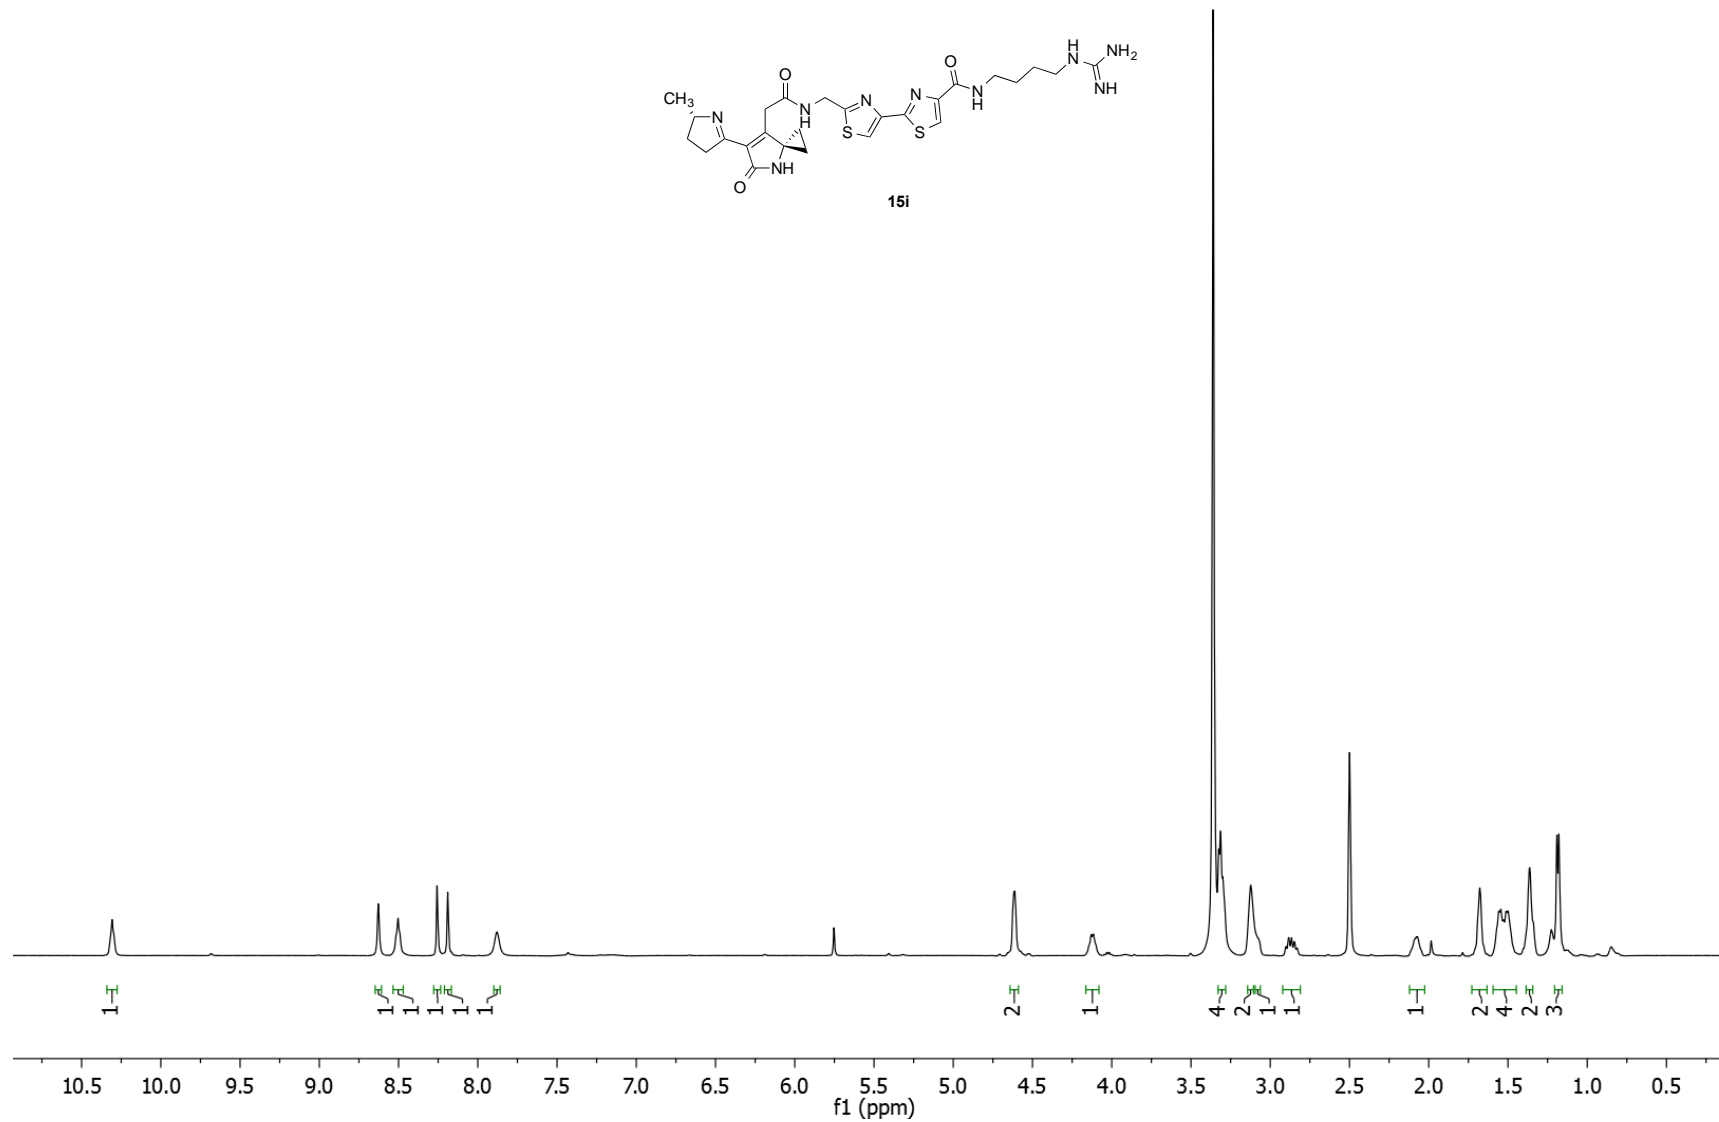

$^{13}\text{C}$  NMR, 125 MHz,  $\text{DMSO-}d_6$

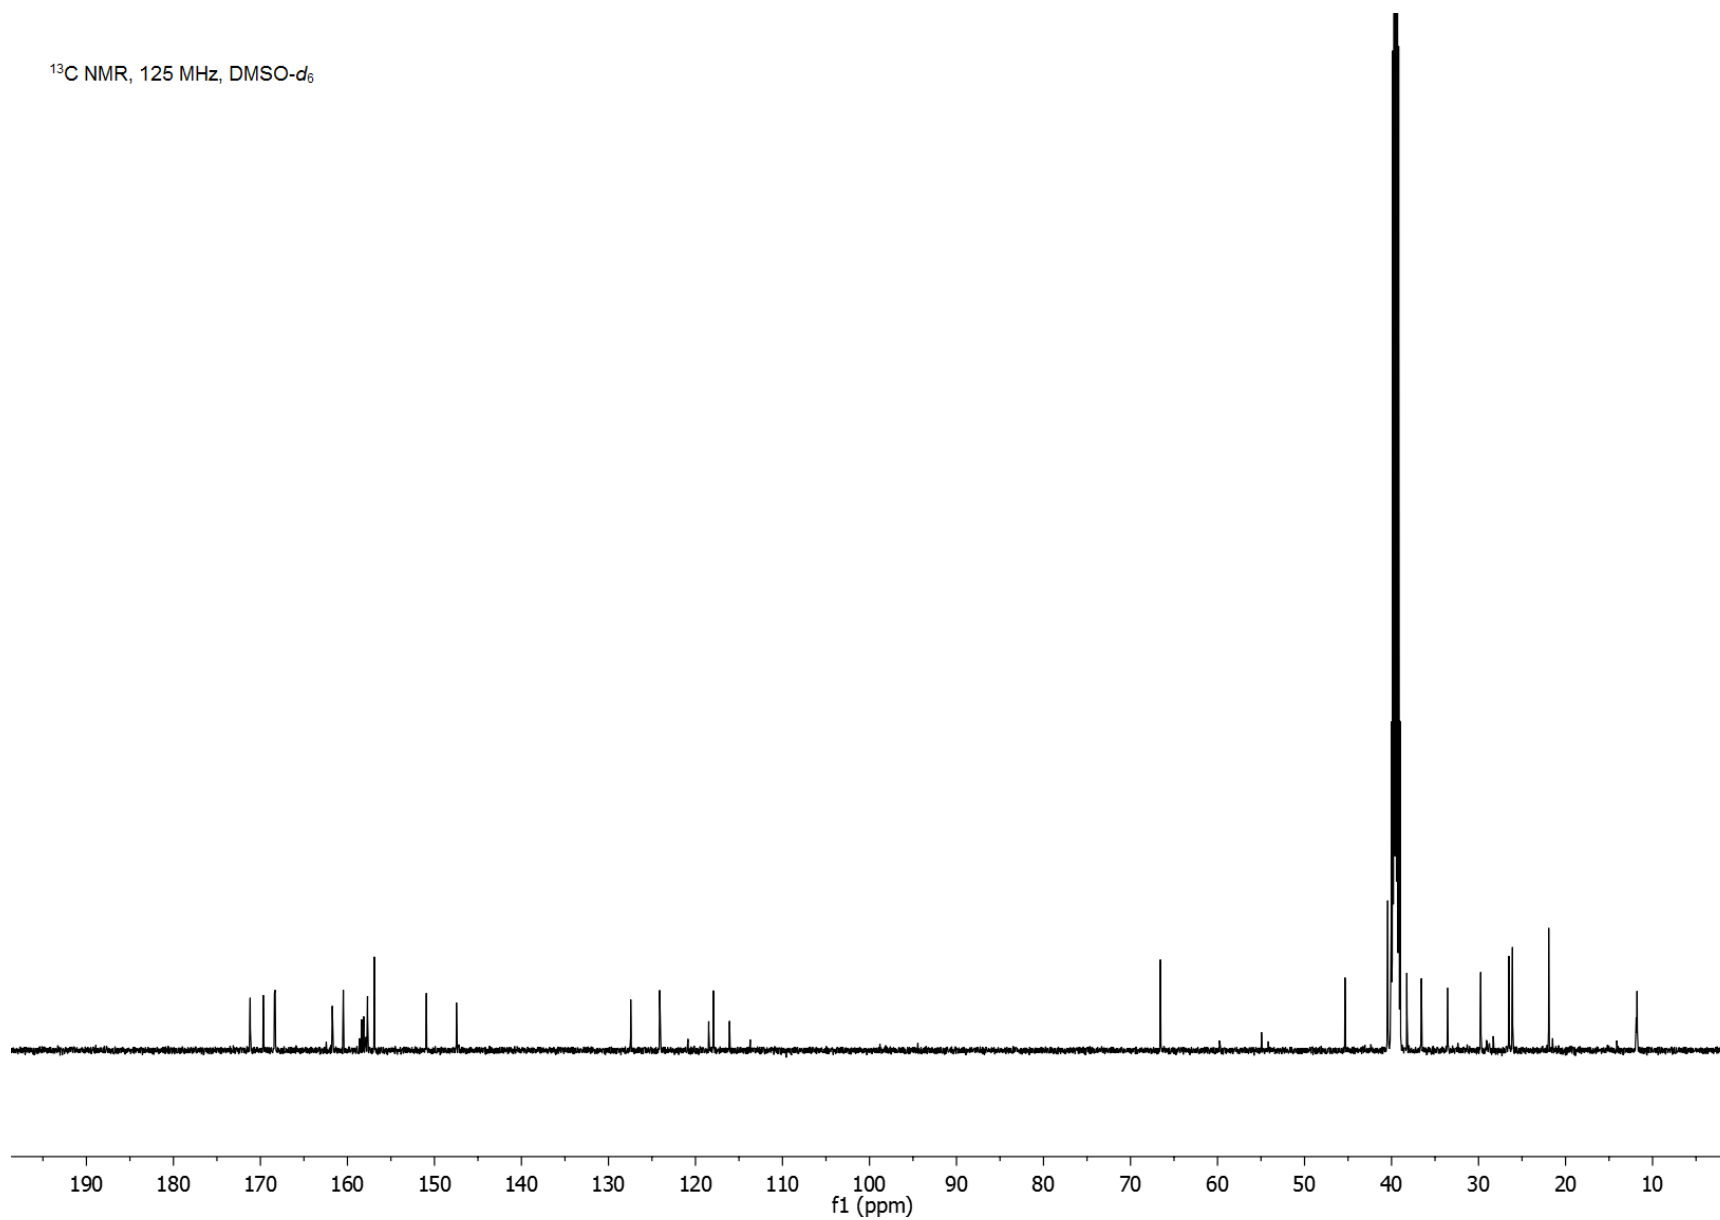

$^1\text{H}$  NMR, 600 MHz,  $\text{DMSO-}d_6$

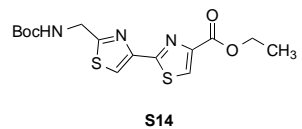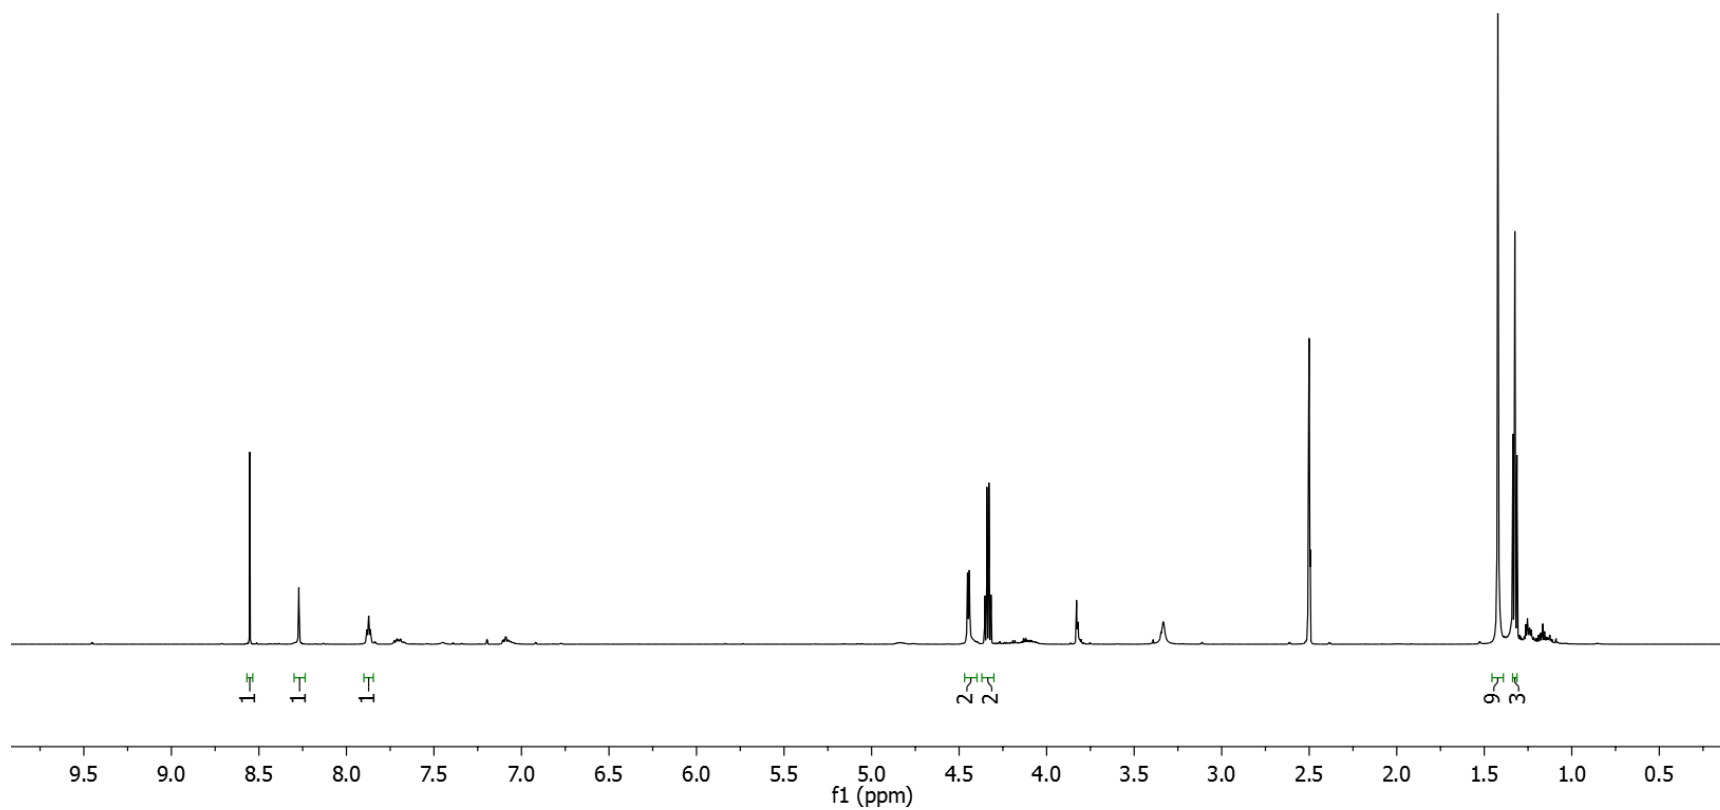



$^{13}\text{C}$  NMR, 150 MHz,  $\text{DMSO-}d_6$

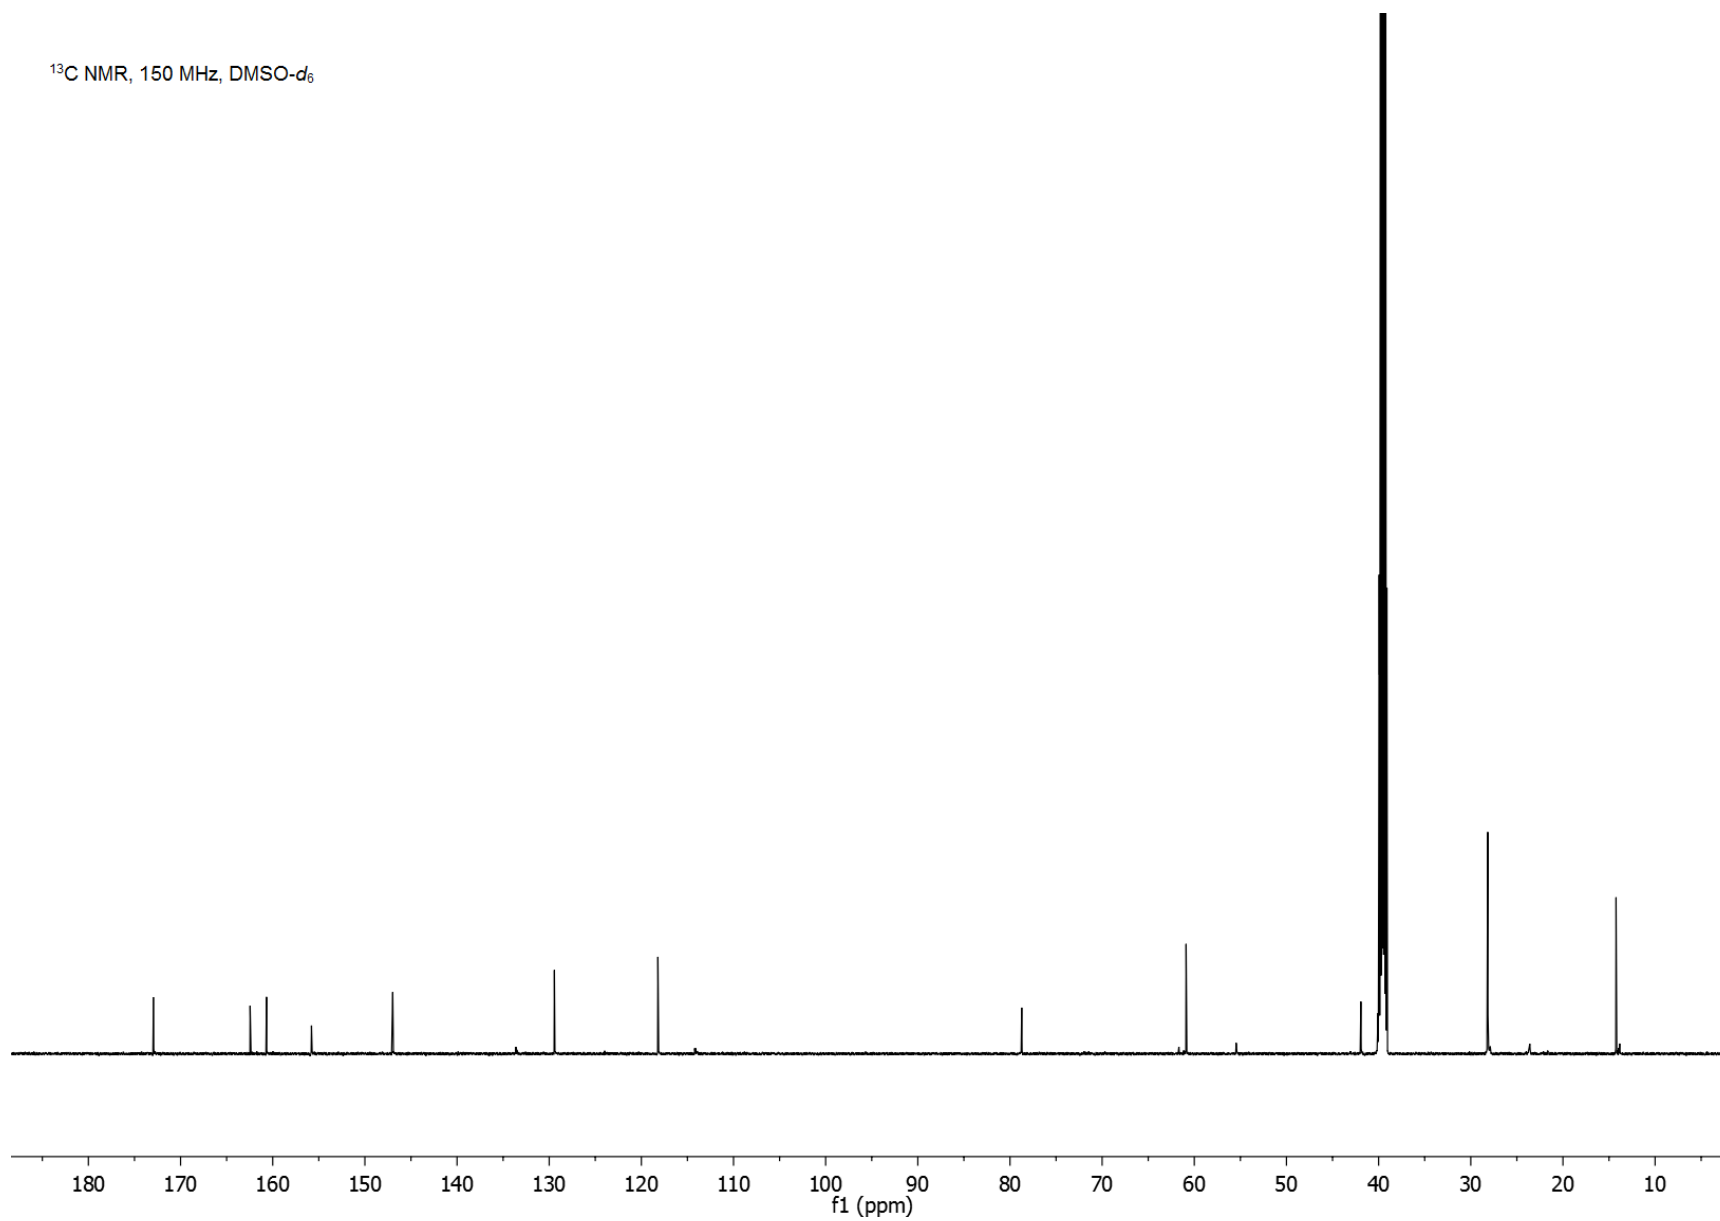

$^1\text{H}$  NMR, 600 MHz,  $\text{DMSO-}d_6$

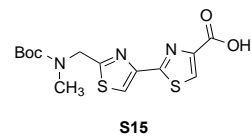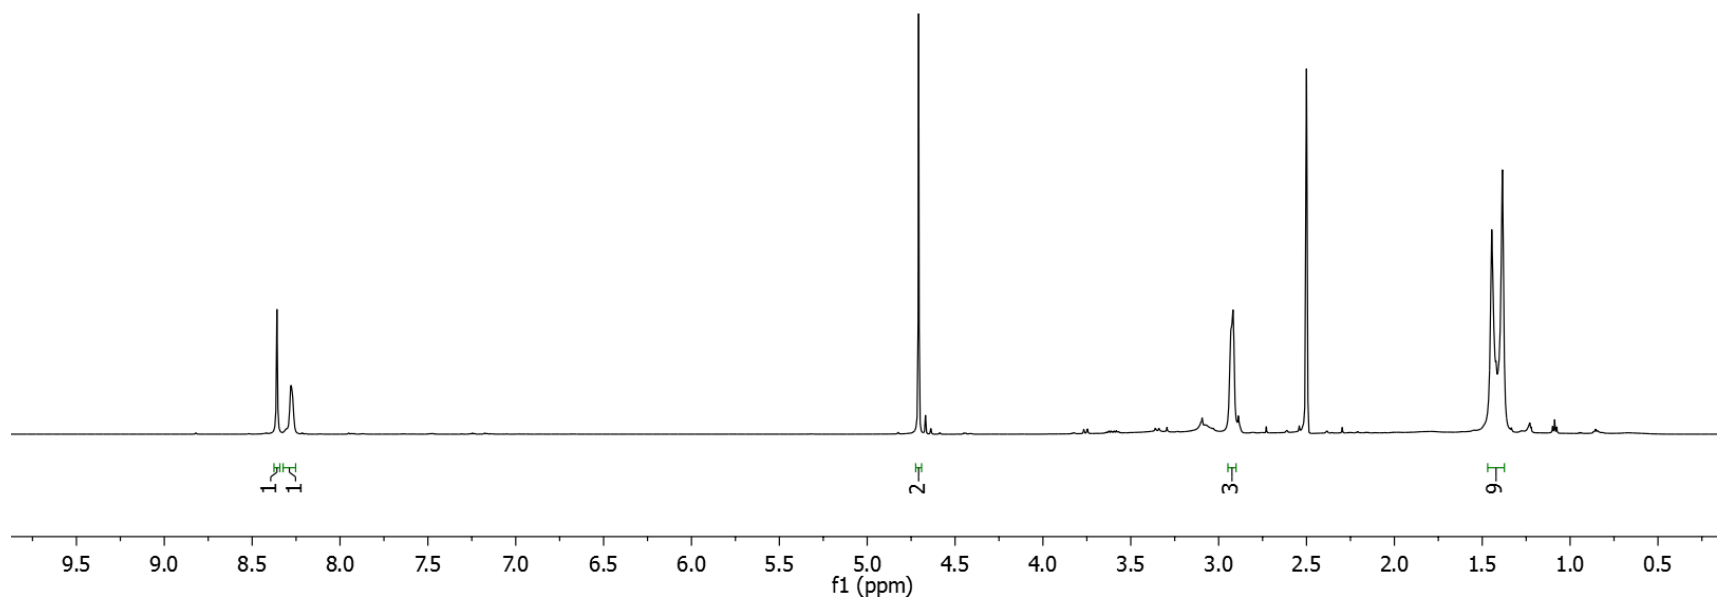

$^{13}\text{C}$  NMR, 150 MHz,  $\text{DMSO-}d_6$

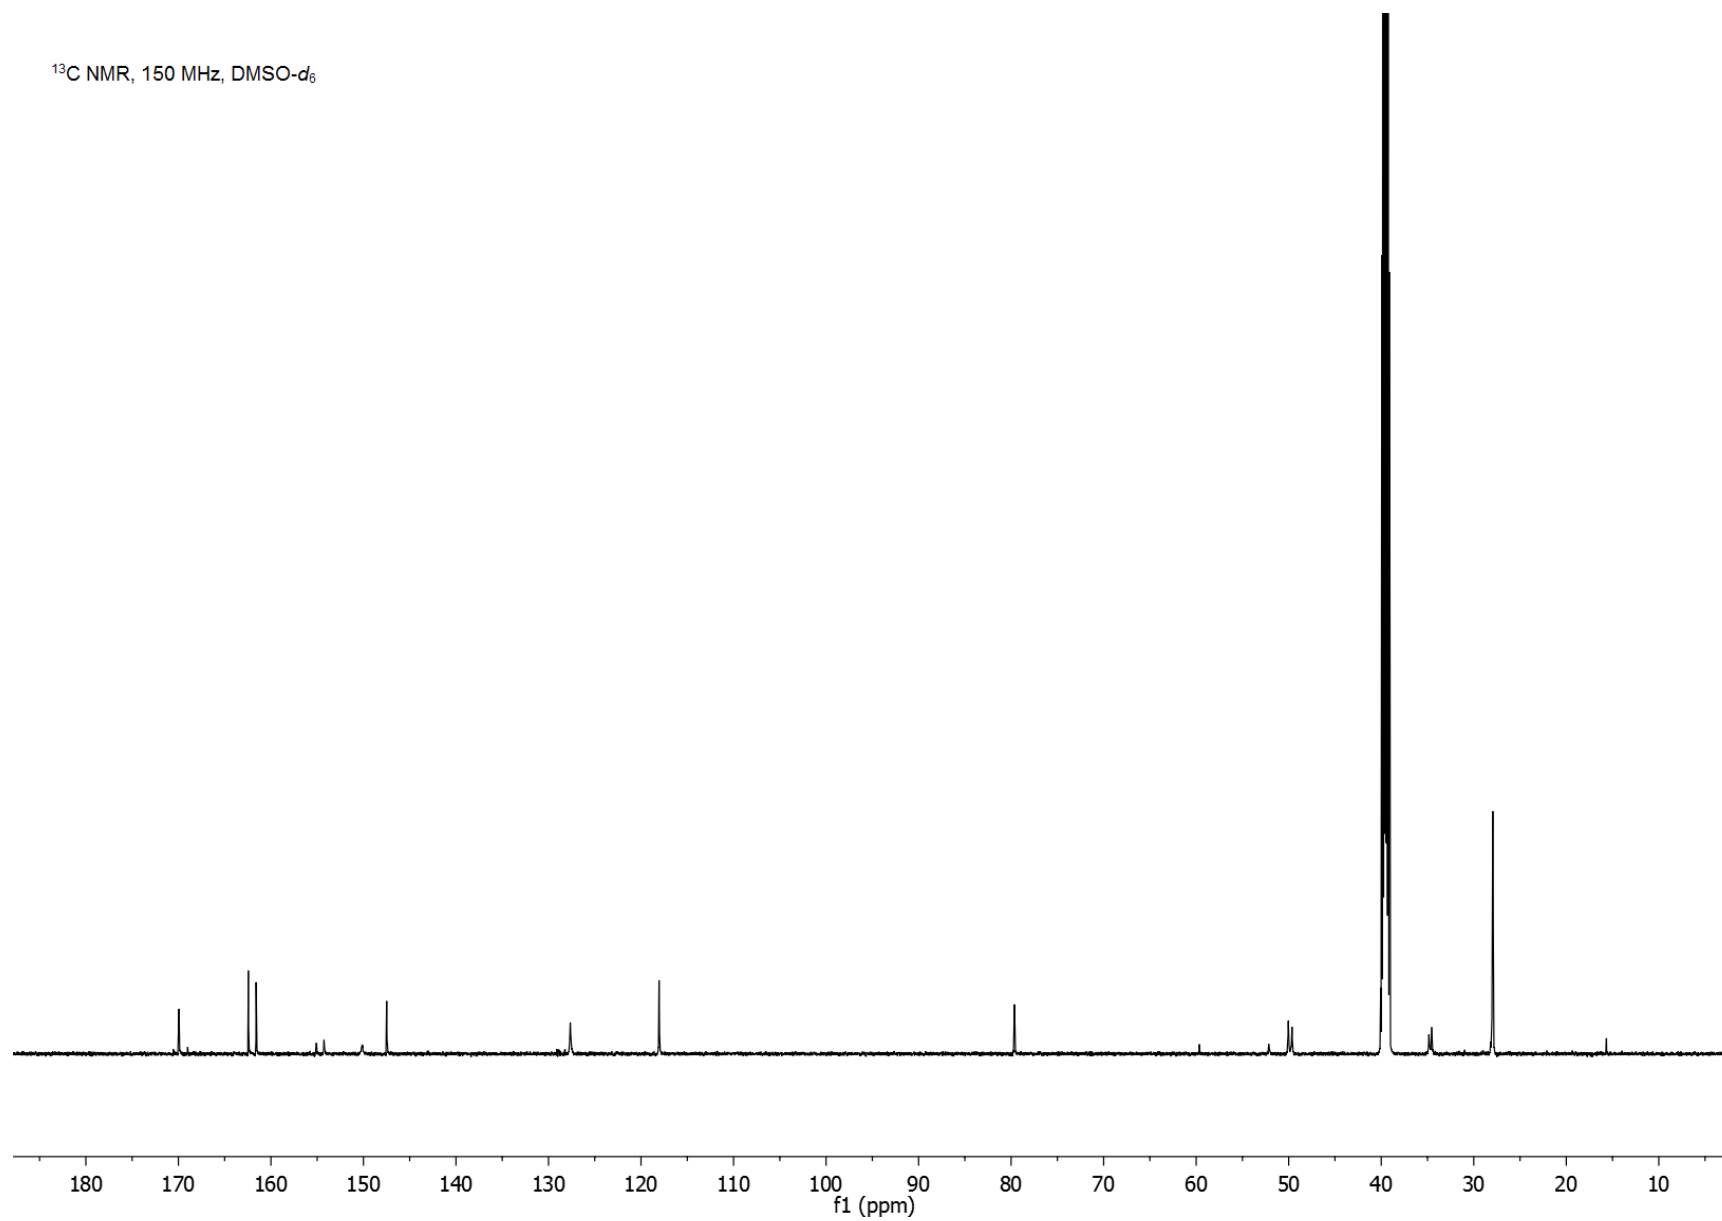

<sup>1</sup>H NMR, 600 MHz, DMSO-*d*<sub>6</sub>

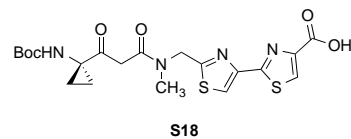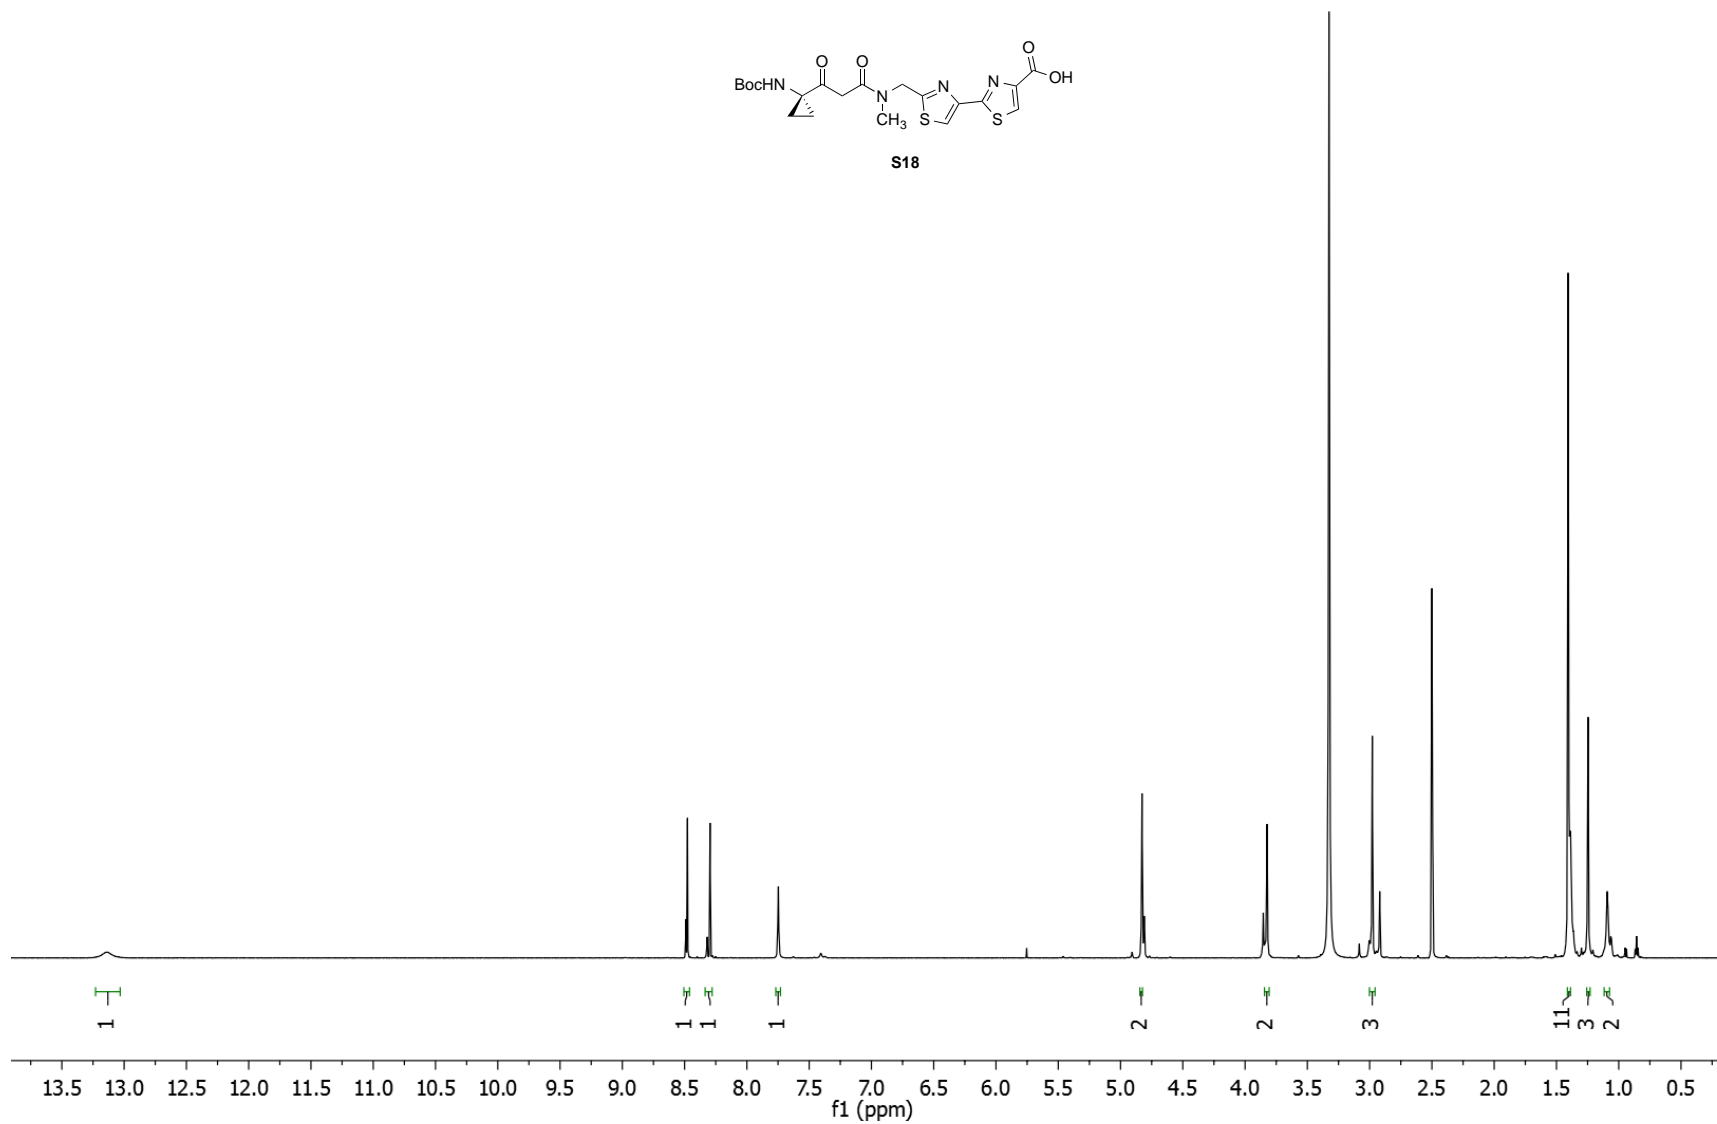

$^{13}\text{C}$  NMR, 150 MHz,  $\text{DMSO-}d_6$

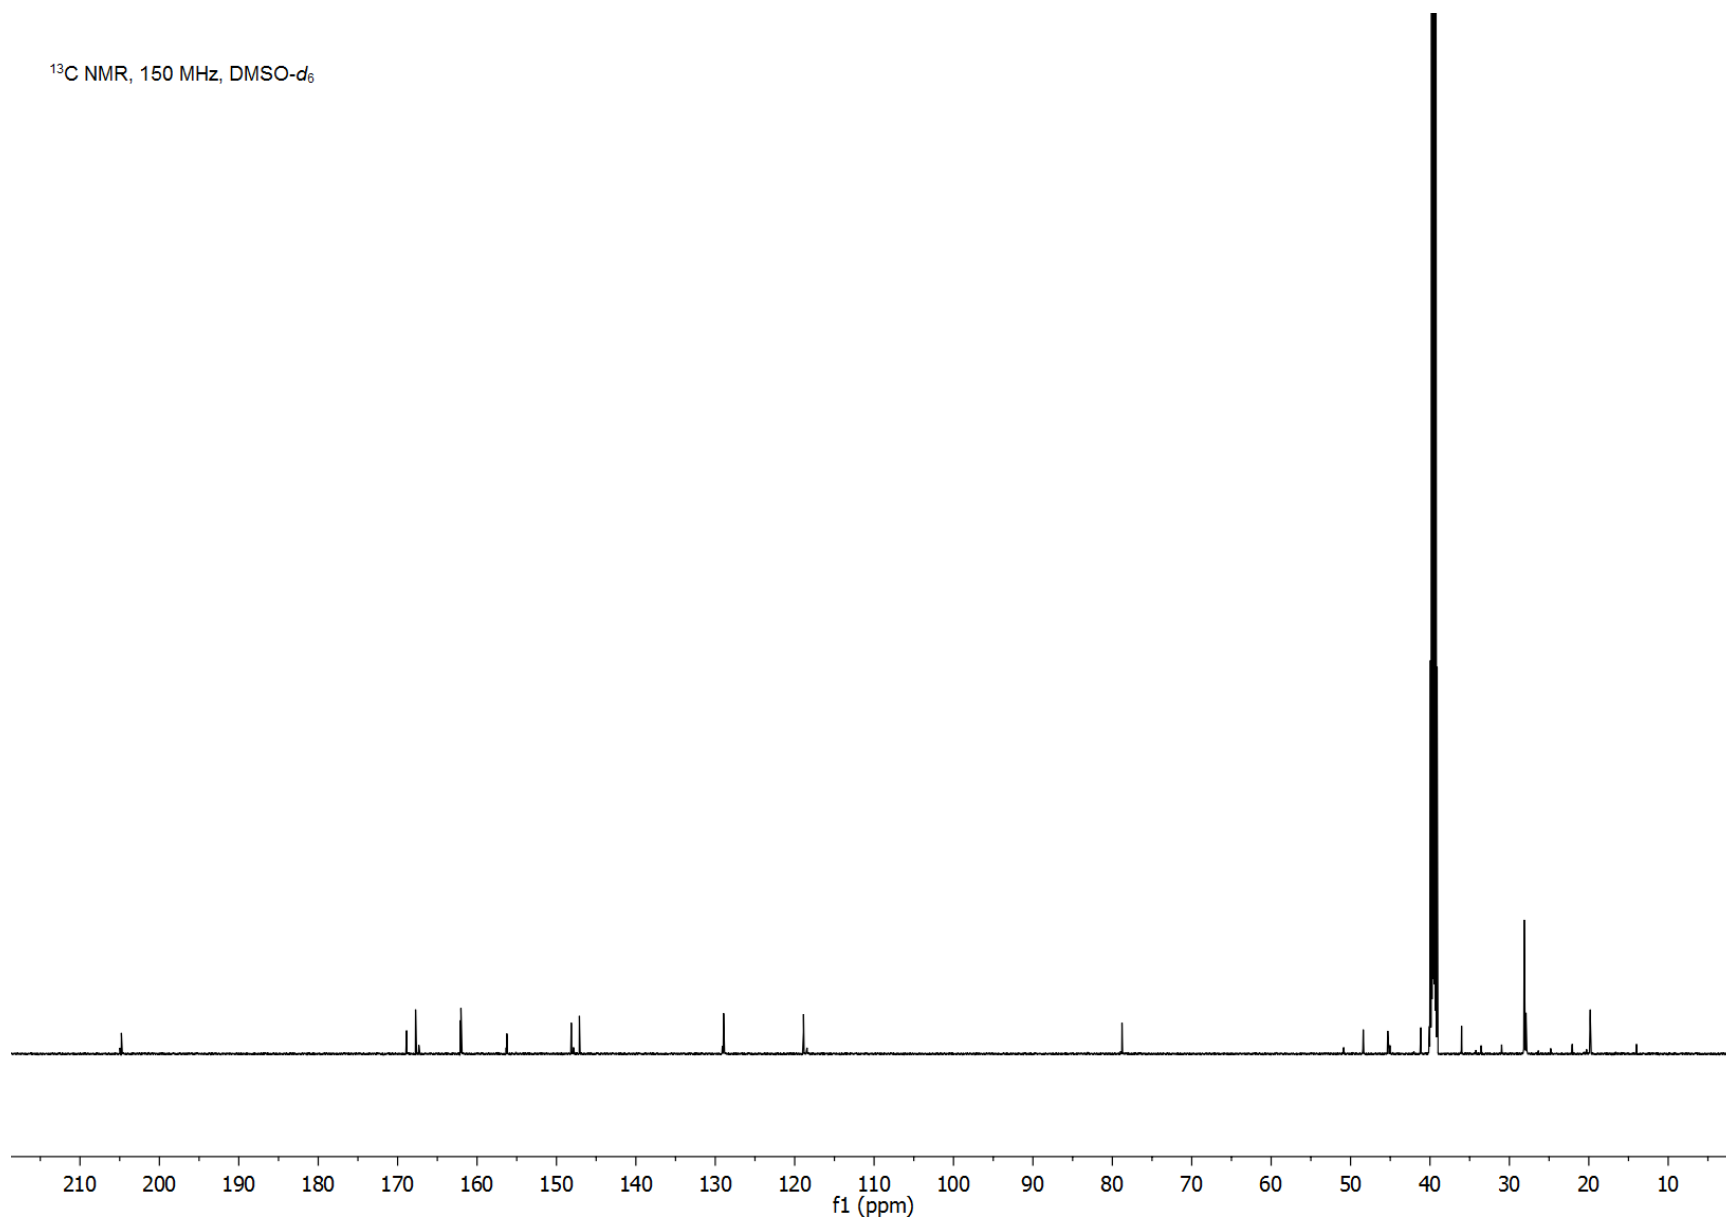

$^1\text{H}$  NMR, 600 MHz,  $\text{DMSO-}d_6$

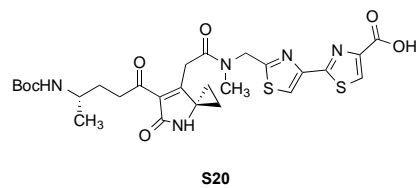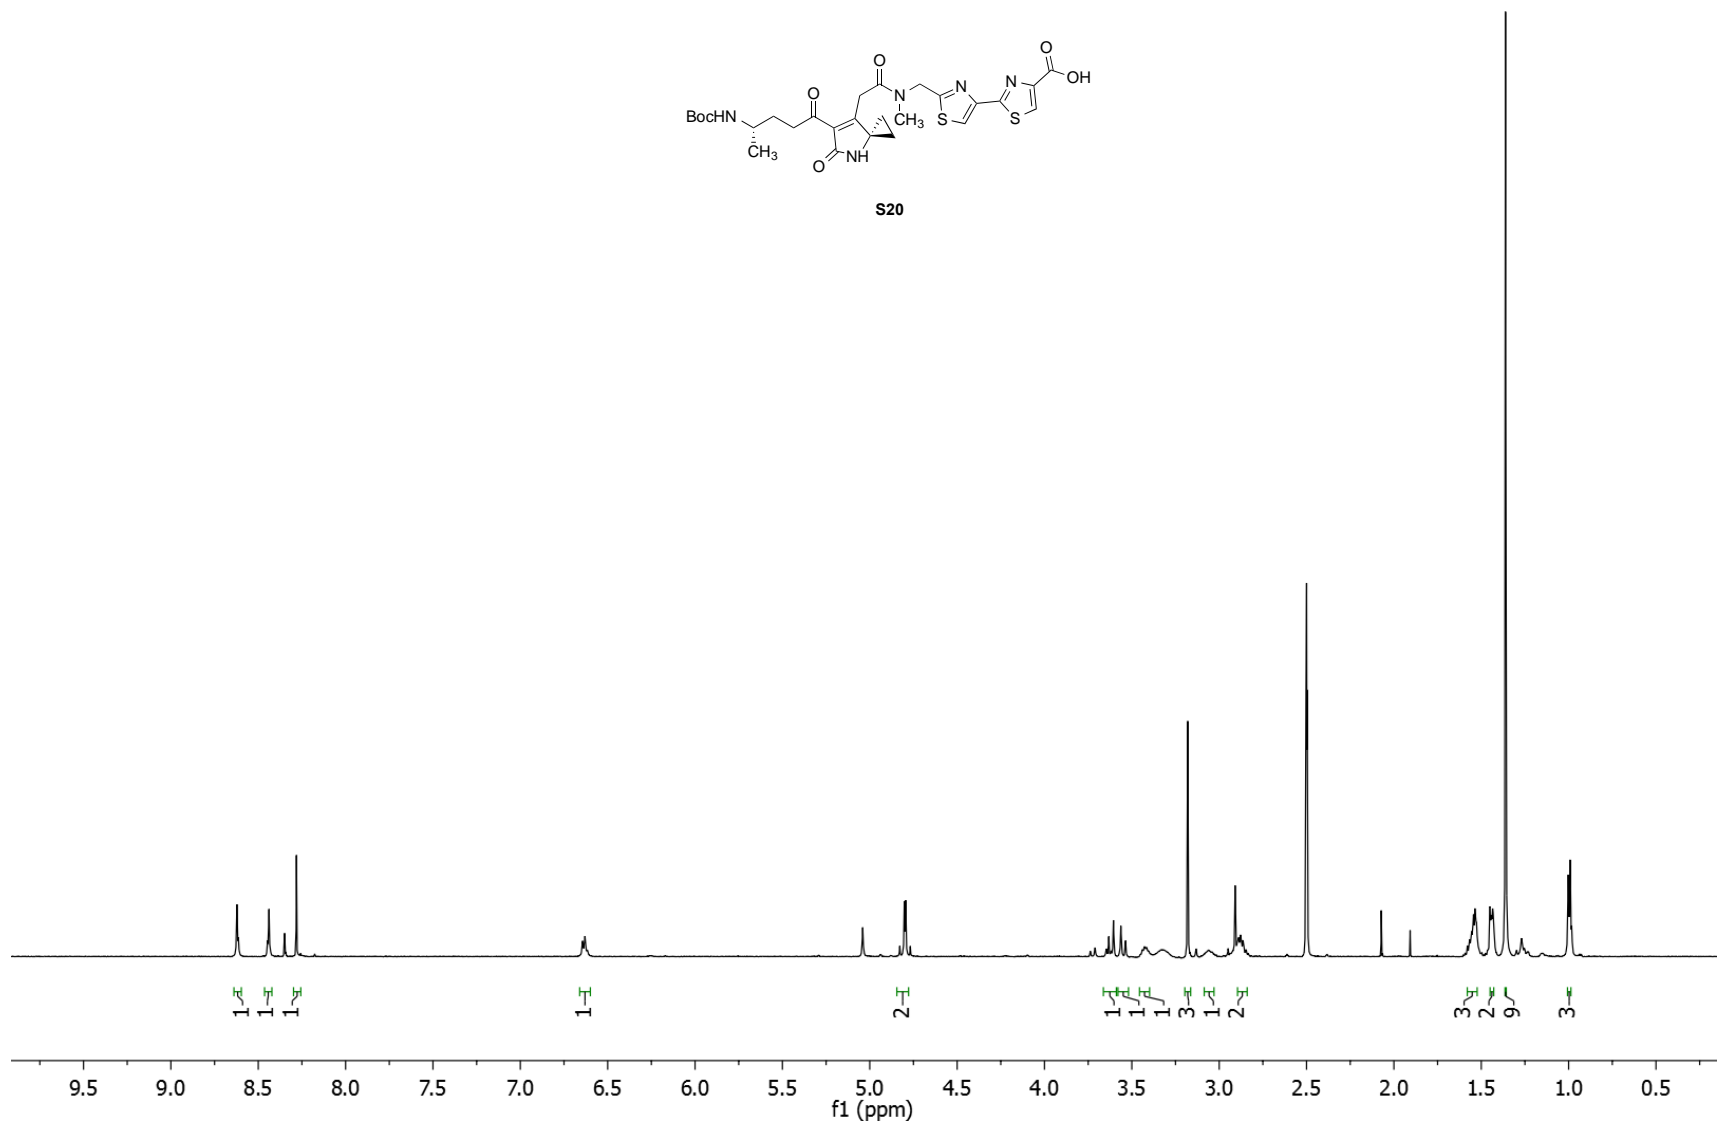

$^{13}\text{C}$  NMR, 150 MHz,  $\text{DMSO-}d_6$

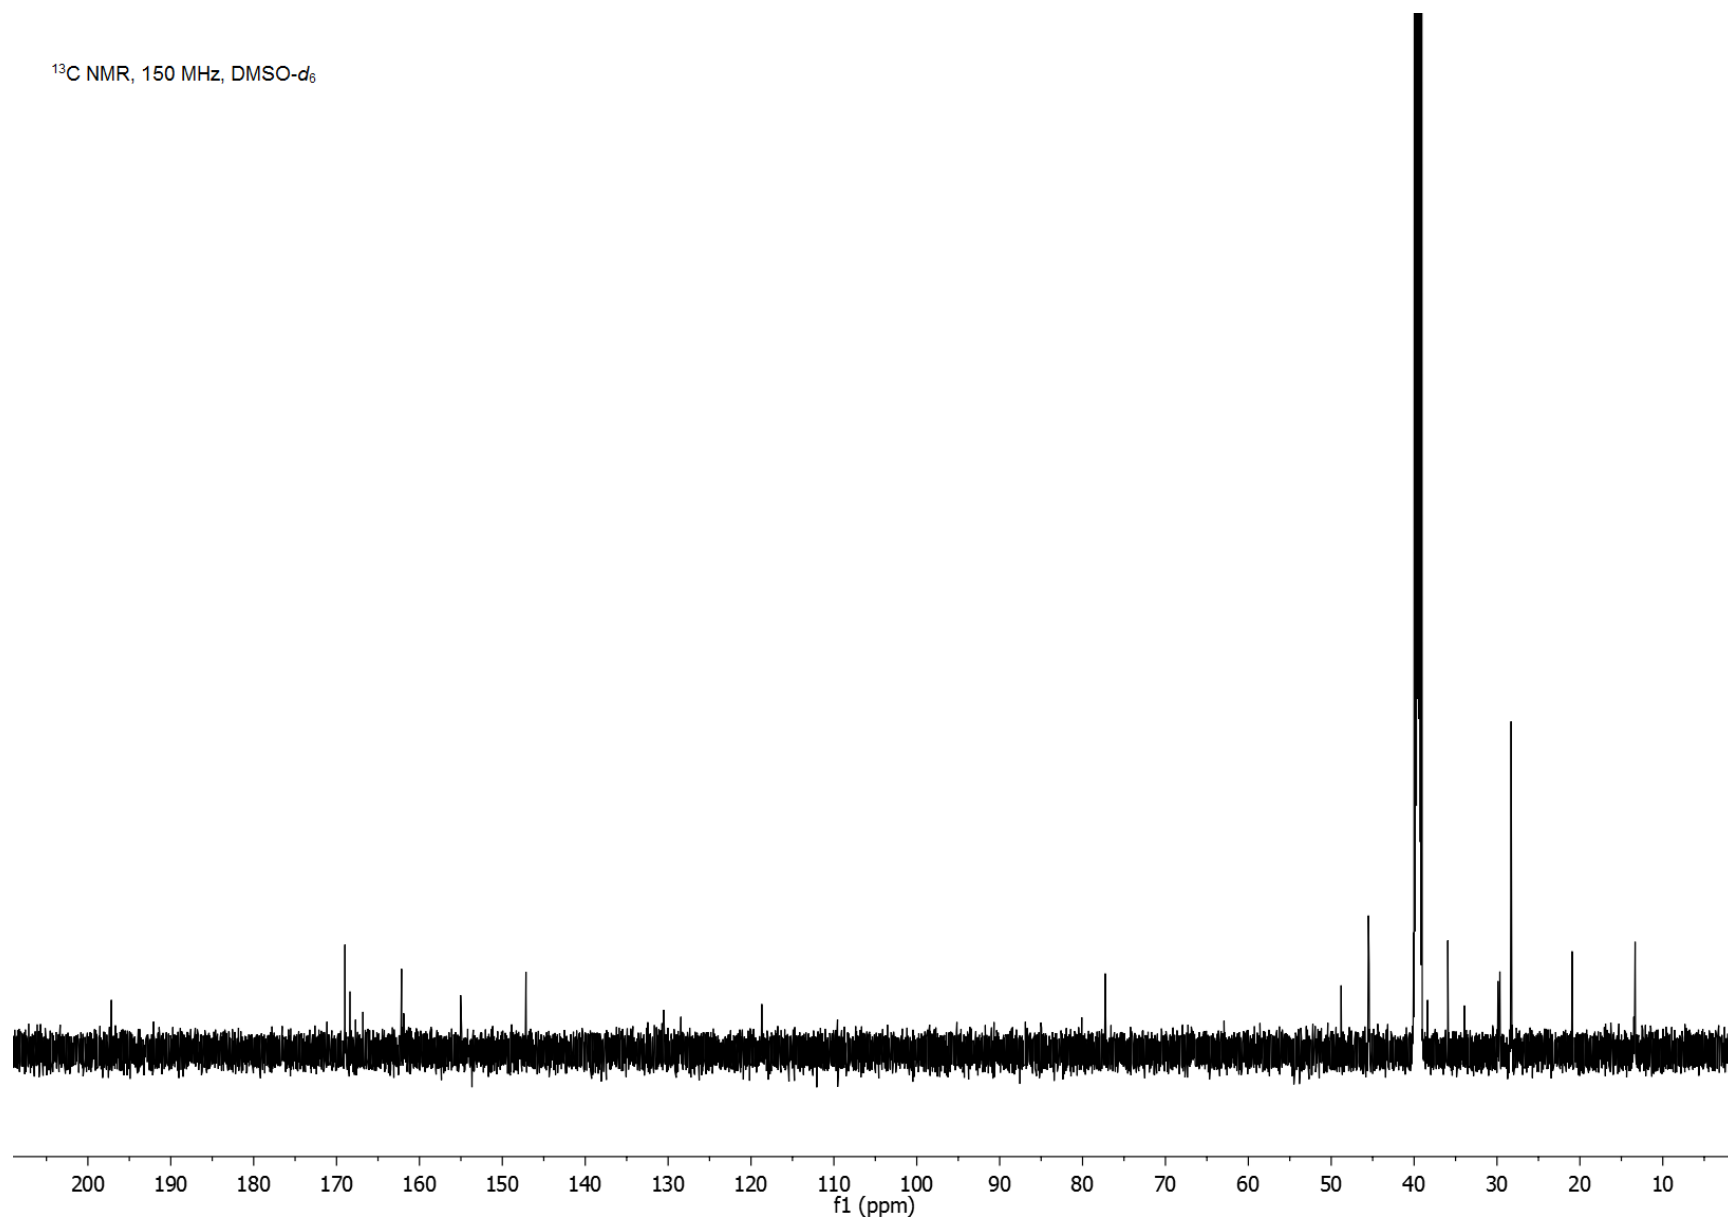

$^1\text{H}$  NMR, 600 MHz,  $\text{DMSO-}d_6$

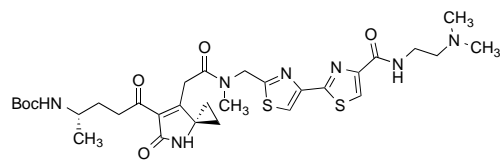

19

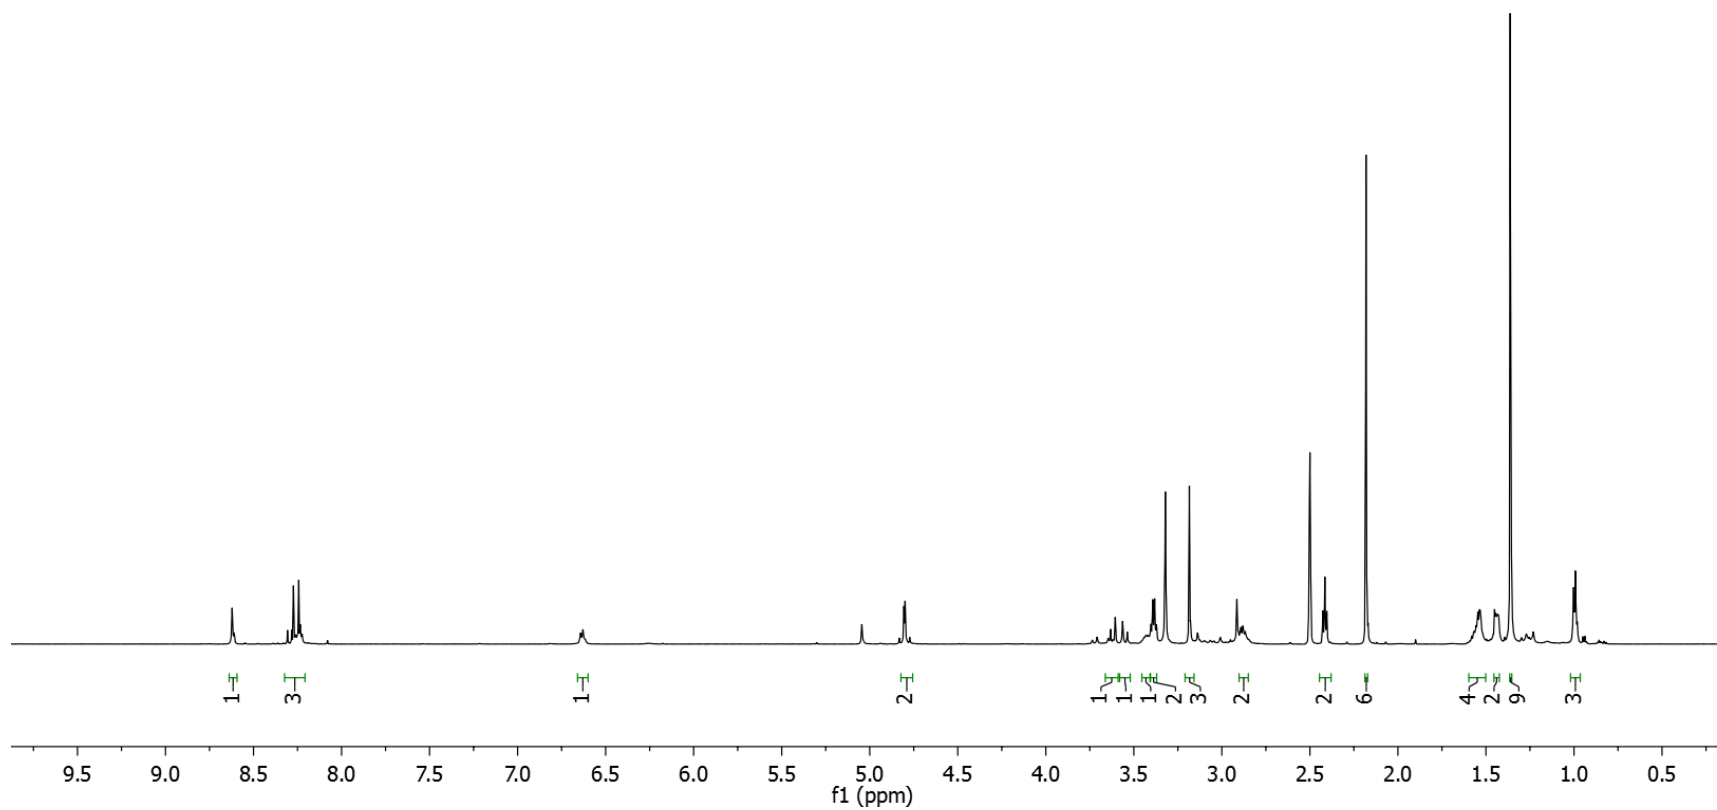



$^{13}\text{C}$  NMR, 150 MHz,  $\text{DMSO-}d_6$

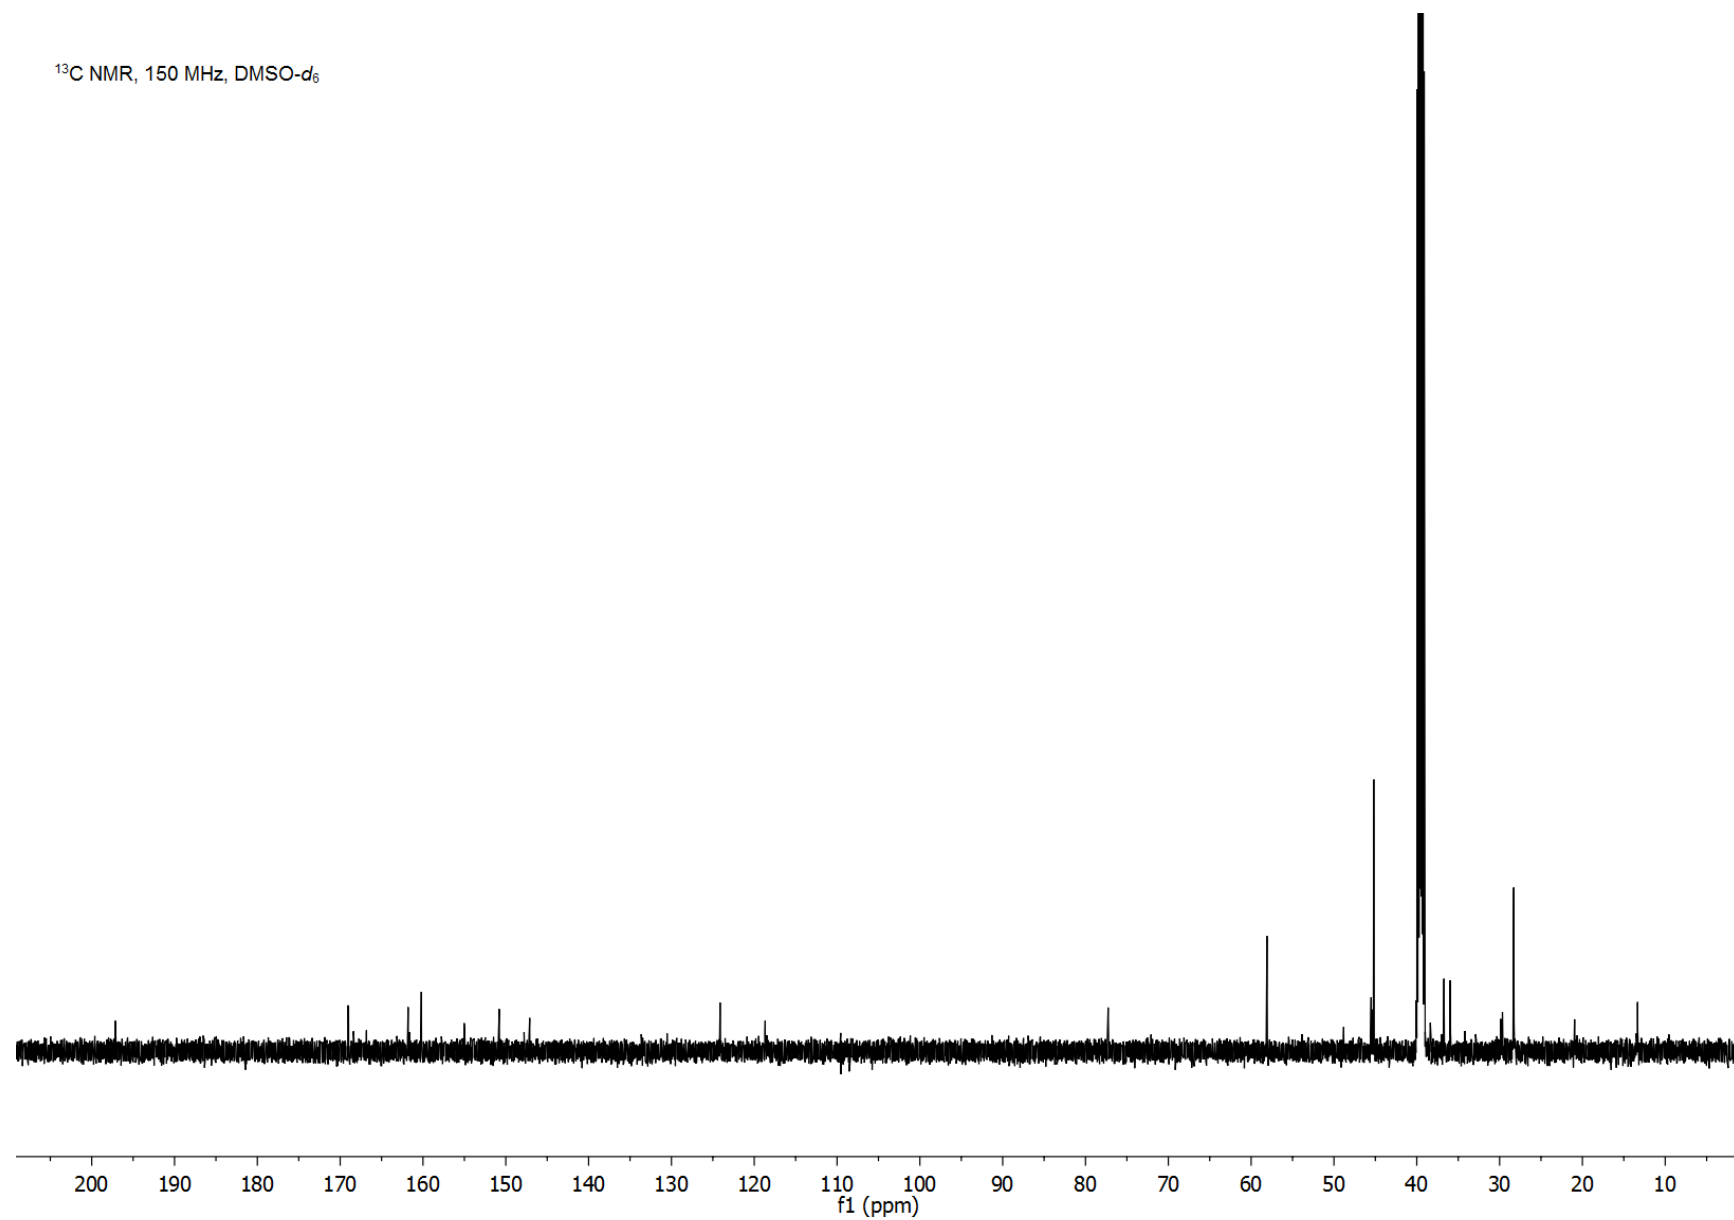



$^{13}\text{C}$  NMR, 150 MHz, DMSO- $d_6$

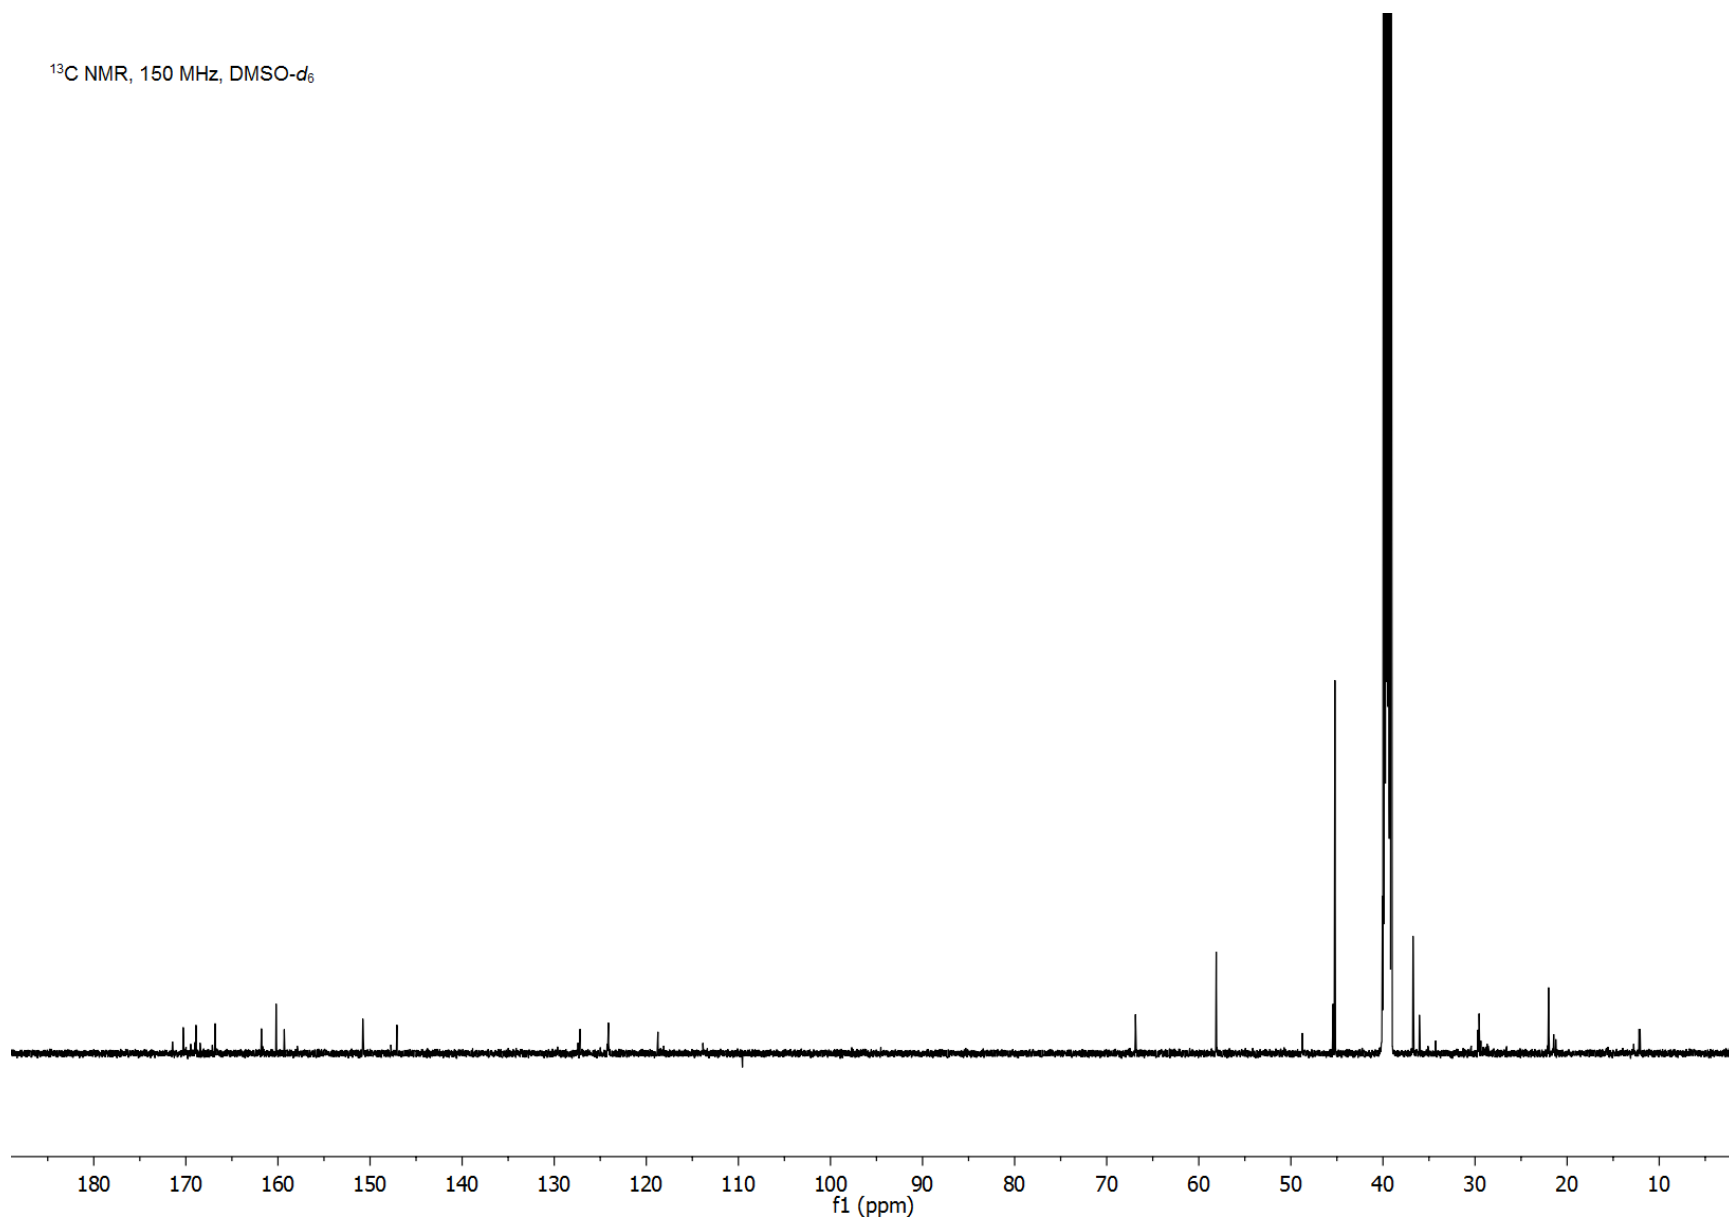

## Bibliography.

- (1) Still, W. C.; Kahn, M.; Mitra, A. *J. Org. Chem.* **1978**, *43*, 2923.
- (2) *SiliaBond® TMA Acetate: a NEW strong anion exchange sorbent and its applications in SPE format*; François Béland, N. H., Steeves Potvin and Lynda Tremblay, Ed.; SiliCycle, 2009.
- (3) Pangborn, A. B.; Giardello, M. A.; Grubbs, R. H.; Rosen, R. K.; Timmers, F. *J. Organometallics* **1996**, *15*, 1518.
- (4) Tanaka, A.; Usuki, T. *Tetrahedron Lett.* **2011**, *52*, 5036.
- (5) Healy, A. R.; Vizcaino, M. I.; Crawford, J. M.; Herzon, S. B. *J. Am. Chem. Soc.* **2016**, *138*, 5426.
- (6) Bae, H. Y.; Sim, J. H.; Lee, J.-W.; List, B.; Song, C. E. *Angew. Chem., Int. Ed.* **2013**, *52*, 12143.
- (7) Hickey, S. M.; Ashton, T. D.; Khosa, S. K.; Pfeffer, F. M. *Synlett* **2012**, *23*, 1779.
